# Supplementary material for: Transcriptomic Analysis Revealed Reactive Oxygen Species Scavenging Mechanisms Associated With Ferrous Iron Toxicity in Aromatic Keteki Joha Rice
Source: Front Plant Sci. 2022 Feb 24;13:798580. doi: 10.3389/fpls.2022.798580 (PMC8913046; doi:10.3389/fpls.2022.798580)
Supplement: Supplementary Table S2 — Total differentially expressed genes and their annotation in all tissue samples. [file Table_2.XLSX]

## Sheet: Fe_root_annotated
	Gene	baseMean	log2FoldChange	lfcSE	pvalue	padj	MSU_annotation	RAPD	Oryzabase_symbol	Custom Annot	References	UNIPROT	Uniprot.Entry.name	Status	Protein.names	Gene.names	Gene.ontology..GO.	Subcellular.location..CC.	Cross.reference..KEGG.	Cross.reference..Pfam.
4901	LOC_Os06g01590	246.742	10.2582	1.32551	4.18e-18	1.92e-16	lactate/malate dehydrogenase, putative, expressed	Os06g0104900		OsLDHB		Q9LWZ6	Q9LWZ6_ORYSJ	unreviewed	L-lactate dehydrogenase (EC 1.1.1.27)	Os06g0104900 OSNPB_060104900	cytoplasm [GO:0005737]; L-lactate dehydrogenase activity [GO:0004459]; carbohydrate metabolic process [GO:0005975]; carboxylic acid metabolic process [GO:0019752]		osa:4339856;	PF02866;PF00056;
1745	LOC_Os02g37520	35.6491	9.45874	2.84054	2.1e-11	4.2e-10	RNA-binding protein FUS, putative, expressed	Os02g0587600				Q6YY05	Q6YY05_ORYSJ	unreviewed	Os02g0587600 protein	Os02g0587600 OSNPB_020587600
5997	LOC_Os07g41340	211.968	9.17848	1.02455	3.24e-18	1.51e-16	B12D protein, putative, expressed	Os07g0604600		OsB12D	He et al. 2014	Q0D4T7	Q0D4T7_ORYSJ	unreviewed	Os07g0604600 protein (Fragment)	Os07g0604600	integral component of membrane [GO:0016021]			PF06522;
2845	LOC_Os03g31750	4879.68	8.97441	0.991009	6.34e-21	3.9e-19	pyruvate, phosphate dikinase, chloroplast precursor, putative, expressed	Os03g0432100	osppdka, ppdka	OsPPDKA	Moons et al. 1988	Q75KR1	PPDK2_ORYSJ	reviewed	Pyruvate, phosphate dikinase 2 (EC 2.7.9.1) (Pyruvate, orthophosphate dikinase 2)	PPDK2 CPDK2 Os03g0432100 LOC_Os03g31750 OsJ_010907 OSJNBa0036E17.10	cytoplasm [GO:0005737]; ATP binding [GO:0005524]; kinase activity [GO:0016301]; metal ion binding [GO:0046872]; pyruvate, phosphate dikinase activity [GO:0050242]; pyruvate metabolic process [GO:0006090]	SUBCELLULAR LOCATION: Cytoplasm.	osa:4333181;	PF00391;PF02896;PF01326;
6788	LOC_Os09g11020	13.6258	7.80194	2.66223	1.71e-08	2.2e-07	NBS-LRR disease resistance protein, putative, expressed	NA	NA			B9EXS3	B9EXS3_ORYSJ	unreviewed	NB-ARC domain-containing protein	OsJ_02394	ADP binding [GO:0043531]			PF00931;
7962	LOC_Os11g25040	13.2622	7.7575	2.65509	1.85e-08	2.37e-07	plant-specific domain TIGR01615 family protein, expressed	Os11g0437600				Q2R5G9	Q2R5G9_ORYSJ	unreviewed	Os11g0437600 protein (cDNA, clone: J065181M02, full insert sequence)	LOC_Os11g25040 Os11g0437600 OSNPB_110437600			osa:9271655;	PF04720;
4380	LOC_Os05g15920	11.1663	7.42374	2.64382	1.2e-07	1.37e-06	glycosyl hydrolase, putative, expressed	Os05g0248200				A0A345DGH7	A0A345DGH7_ORYSJ	unreviewed	Xylanase inhibitor protein	XIP	hydrolase activity, acting on glycosyl bonds [GO:0016798]; xylan catabolic process [GO:0045493]			PF00704;
7986	LOC_Os11g28540	9.34404	6.99701	2.69972	2.91e-06	2.6e-05	expressed protein	NA	NA			Q2R4G7	Q2R4G7_ORYSJ	unreviewed	Expressed protein	LOC_Os11g28540
2941	LOC_Os03g44170	64.8149	6.89326	0.857654	1.83e-15	6.32e-14	glutathione S-transferase, putative, expressed	Os03g0643700	OsGSTU44			A0A0P0W193	A0A0P0W193_ORYSJ	unreviewed	Glutathione S-transferase, putative (Os03g0643700 protein)	Os03g0643700 OSJNBa0038E17.17	cytoplasm [GO:0005737]; glutathione transferase activity [GO:0004364]; glutathione metabolic process [GO:0006749]		osa:4333555;	PF02798;
1740	LOC_Os02g37360	46.5893	6.87263	1.07574	1.94e-10	3.37e-09	NA	Os02g0585700				NA	NA	NA	NA	NA	NA	NA	NA	NA
2895	LOC_Os03g39850	287.463	6.7791	0.438411	1.89e-54	1.24e-51	glutathione S-transferase, putative, expressed	Os03g0595600	OsGSTU43			Q10HA8	Q10HA8_ORYSJ	unreviewed	Glutathione S-transferase, N-terminal domain containing protein, expressed	LOC_Os03g39850	transferase activity [GO:0016740]		osa:4333371;	PF13417;
7208	LOC_Os10g07114	23.9564	6.68921	1.3327	1.37e-08	1.78e-07	expressed protein	Os10g0159033				C7J7U5	C7J7U5_ORYSJ	unreviewed	Os10g0159033 protein	Os10g0159033 OSNPB_100159033
4815	LOC_Os05g48200	1841.53	6.67246	0.618868	2.38e-28	2.86e-26	glutamate synthase, chloroplast precursor, putative, expressed	Os05g0555600	OsGLT2, OsNADH-GOGAT2, NADH-GOGAT2, OsGOGAT2			Q0DG35	GLT2_ORYSJ	reviewed	Glutamate synthase 2 [NADH], chloroplastic (EC 1.4.1.14) (NADH-dependent glutamate synthase 2) (NADH-GOGAT 2)	Os05g0555600 LOC_Os05g48200 OJ1214_E03.1 OJ1263_E10.17	chloroplast [GO:0009507]; 3 iron, 4 sulfur cluster binding [GO:0051538]; flavin adenine dinucleotide binding [GO:0050660]; FMN binding [GO:0010181]; glutamate synthase (NADH) activity [GO:0016040]; glutamate synthase activity [GO:0015930]; iron ion binding [GO:0005506]; oxidoreductase activity [GO:0016491]; ammonia assimilation cycle [GO:0019676]; glutamate biosynthetic process [GO:0006537]; L-gl…	SUBCELLULAR LOCATION: Plastid, chloroplast {ECO:0000305}.	osa:4339561;	PF14691;PF00310;PF04898;PF01645;PF01493;PF07992;
6731	LOC_Os08g45120	6.58948	6.40237	2.58196	5.97e-06	5.01e-05	expressed protein	NA	NA			Q84ZA0	Q84ZA0_ORYSJ	unreviewed	Uncharacterized protein	P0705A05.129 OSJNBa0044E16.13
2387	LOC_Os03g08530	364.351	6.38849	0.391912	2.68e-60	2.61e-57	aminotransferase, classes I and II, domain containing protein, expressed	Os03g0183600	OsAlaAT2, AlaAT2			Q94HF9	Q94HF9_ORYSJ	unreviewed	Putative alanine aminotransferase	OSJNBa0032G08.9	pyridoxal phosphate binding [GO:0030170]; transaminase activity [GO:0008483]; biosynthetic process [GO:0009058]			PF00155;
2139	LOC_Os02g55890	8625.31	6.22034	0.268307	3.63e-120	1.77e-116	inorganic H+ pyrophosphatase, putative, expressed	Os02g0802500				Q69SK4	Q69SK4_ORYSJ	unreviewed	Os02g0802500 protein (Proton translocating pyrophosphatase)	Os02g0802500 OSJNBa0032L17.38 P0689B12.15	integral component of membrane [GO:0016021]; inorganic diphosphatase activity [GO:0004427]; pyrophosphate hydrolysis-driven proton transmembrane transporter activity [GO:0009678]		osa:4331044;	PF03030;
8161	LOC_Os11g46000	5.84809	6.09144	2.63577	3.34e-05	0.000238824	von Willebrand factor type A domain containing protein, putative, expressed	Os11g0687200				A0A0P0Y5F2	A0A0P0Y5F2_ORYSJ	unreviewed	Os11g0687200 protein	Os11g0687200 OSNPB_110687200				PF13768;
8162	LOC_Os11g46000	5.84809	6.09144	2.63577	3.34e-05	0.000238824	von Willebrand factor type A domain containing protein, putative, expressed	Os11g0687200				B7F036	B7F036_ORYSJ	unreviewed	Expressed protein (Os11g0687200 protein) (cDNA clone:002-124-G07, full insert sequence)	LOC_Os11g46000 Os11g0687200 OSNPB_110687200				PF13768;
8163	LOC_Os11g46000	5.84809	6.09144	2.63577	3.34e-05	0.000238824	von Willebrand factor type A domain containing protein, putative, expressed	Os11g0687200				Q0IR20	Q0IR20_ORYSJ	unreviewed	Os11g0687200 protein	Os11g0687200			osa:4351147;	PF13768;
288	LOC_Os01g15060	5.549	6.06105	2.56844	1.84e-05	0.000139276	expressed protein	Os01g0254400				Q5NBT7	Q5NBT7_ORYSJ	unreviewed	Os01g0254400 protein	Os01g0254400 OSNPB_010254400	integral component of membrane [GO:0016021]; membrane [GO:0016020]		osa:107277409;	PF13962;
1744	LOC_Os02g37490	5.37854	5.94917	2.59824	3.62e-05	0.000256197	glycine-rich cell wall structural protein precursor, putative, expressed	Os02g0587000				Q6YY09	Q6YY09_ORYSJ	unreviewed	Glycine-rich protein (Os02g0587000 protein) (cDNA clone:001-103-D05, full insert sequence)	Os02g0587000 OSNPB_020587000			osa:4329813;	PF07172;
8350	LOC_Os12g09540	391.034	5.88766	0.417849	3.05e-46	1.28e-43	phosphoribosylamine--glycine ligase, putative, expressed	Os12g0197100	OsPRAGL			Q2QWF3	Q2QWF3_ORYSJ	unreviewed	Os12g0197100 protein (Phosphoribosylamine-glycine ligase, chloroplast, putative, expressed) (cDNA clone:J023114O15, full insert sequence)	LOC_Os12g09540 Os12g0197100 OSNPB_120197100	ATP binding [GO:0005524]; metal ion binding [GO:0046872]; phosphoribosylamine-glycine ligase activity [GO:0004637]; purine nucleobase biosynthetic process [GO:0009113]		osa:4351721;	PF01071;PF02843;PF02844;
8437	LOC_Os12g22970	33.1932	5.87433	0.881149	2.39e-11	4.72e-10	expressed protein	Os12g0418600				Q2QST8	Q2QST8_ORYSJ	unreviewed	Expressed protein (Os12g0418600 protein)	LOC_Os12g22970 Os12g0418600 OSNPB_120418600
5600	LOC_Os07g03020	4.96692	5.805	2.58056	4.78e-05	0.000329198	expressed protein	NA	NA			A3BG49	A3BG49_ORYSJ	unreviewed	Uncharacterized protein	OsJ_22926				PF08224;
4641	LOC_Os05g39320	443.868	5.77189	1.15215	2.31e-08	2.9e-07	thiamine pyrophosphate enzyme, C-terminal TPP binding domain containing protein, expressed	Os05g0469800				Q6AUJ8	Q6AUJ8_ORYSJ	unreviewed	Os05g0469800 protein	Os05g0469800 OSNPB_050469800	cytosol [GO:0005829]; carboxy-lyase activity [GO:0016831]; magnesium ion binding [GO:0000287]; thiamine pyrophosphate binding [GO:0030976]		osa:4339068;	PF02775;PF00205;PF02776;
6991	LOC_Os09g29480	37.566	5.67023	0.802012	8.51e-13	2.02e-11	2-aminoethanethiol dioxygenase, putative, expressed	Os09g0471000				Q6K4J5	Q6K4J5_ORYSJ	unreviewed	Uncharacterized protein OJ1118_B06.9-1	OJ1118_B06.9-1	oxidoreductase activity, acting on single donors with incorporation of molecular oxygen, incorporation of two atoms of oxygen [GO:0016702]		osa:4347335;	PF07847;
6992	LOC_Os09g29480	37.566	5.67023	0.802012	8.51e-13	2.02e-11	2-aminoethanethiol dioxygenase, putative, expressed	Os09g0471000				B7EUY2	B7EUY2_ORYSJ	unreviewed	Os09g0471000 protein (cDNA clone:J033134B11, full insert sequence)	Os09g0471000 OSNPB_090471000	oxidoreductase activity, acting on single donors with incorporation of molecular oxygen, incorporation of two atoms of oxygen [GO:0016702]			PF07847;
8413	LOC_Os12g17804	4.61477	5.62593	2.58106	7.94e-05	0.000513094	expressed protein	NA	NA			C7J1H3	C7J1H3_ORYSJ	unreviewed	Os04g0266330 protein (Fragment)	Os04g0266330
1692	LOC_Os02g34800	4.68908	5.59239	2.64456	0.000136855	0.000834611	leucine-rich repeat receptor protein kinase EXS precursor, putative, expressed	NA	NA			B9F0I3	B9F0I3_ORYSJ	unreviewed	LRRNT_2 domain-containing protein	OsJ_07111				PF00560;PF08263;
6643	LOC_Os08g41720	12.0547	5.56939	1.36411	2.19e-06	2.01e-05	auxin efflux carrier component, putative, expressed	Os08g0529000	PIN5C, OsPIN5c, OsPIN5b, PIN4			B7EQ91	B7EQ91_ORYSJ	unreviewed	Uncharacterized protein	OsJ_28036	integral component of membrane [GO:0016021]; transmembrane transport [GO:0055085]			PF03547;
4377	LOC_Os05g15880	69.4702	5.53203	1.19124	1.87e-07	2.07e-06	glycosyl hydrolase, putative, expressed	Os05g0247800	OsXIP, XIP			Q5WMW5	XIP_ORYSJ	reviewed	Xylanase inhibitor protein XIP (OsXIP) (Class III chitinase homolog XIP)	XIP Os05g0247800 LOC_Os05g15880 OJ1037_G10.8 OsJ_17793	extracellular region [GO:0005576]; chitinase activity [GO:0004568]; enzyme inhibitor activity [GO:0004857]; carbohydrate metabolic process [GO:0005975]; defense response to fungus [GO:0050832]	SUBCELLULAR LOCATION: Secreted {ECO:0000269|PubMed:18511458}.	osa:4338211;	PF00704;
3155	LOC_Os03g55680	19.6964	5.5217	1.11985	3.93e-07	4.12e-06	expressed protein	Os03g0765500				A3AN04	A3AN04_ORYSJ	unreviewed	Uncharacterized protein OSJNBa0079B15.19	OSJNBa0079B15.19 OsJ_12707	cytosol [GO:0005829]; nucleus [GO:0005634]; mediator complex binding [GO:0036033]; pollen tube guidance [GO:0010183]
6382	LOC_Os08g19540	18.7343	5.49881	1.03259	9.12e-08	1.06e-06	retrotransposon protein, putative, unclassified, expressed	NA	NA			Q2QSC3	Q2QSC3_ORYSJ	unreviewed	Retrotransposon protein, putative, unclassified	LOC_Os12g24610	nucleic acid binding [GO:0003676]; zinc ion binding [GO:0008270]; DNA integration [GO:0015074]			PF13961;PF13976;PF00665;PF07727;PF00098;
7176	LOC_Os10g02750	54.0932	5.46897	0.620561	5.6e-19	2.86e-17	Ser/Thr protein phosphatase family protein, putative, expressed	Os10g0116800	OsPAP3b			Q7XH73	Q7XH73_ORYSJ	unreviewed	Purple acid phosphatase (EC 3.1.3.2)	LOC_Os10g02750 Os10g0116800 OSNPB_100116800	acid phosphatase activity [GO:0003993]; ferric iron binding [GO:0008199]; ferrous iron binding [GO:0008198]		osa:4347989;	PF00149;
1792	LOC_Os02g39620	240.822	5.44049	0.339157	1.22e-58	1.02e-55	ATOZI1, putative, expressed	Os02g0609200				A0A0N7KFN3	A0A0N7KFN3_ORYSJ	unreviewed	Os02g0609200 protein (Fragment)	Os02g0609200 OSNPB_020609200				PF06592;
7956	LOC_Os11g24140	6857.41	5.43012	0.631063	4.37e-19	2.26e-17	plastocyanin-like domain containing protein, putative, expressed	Os11g0428800	OsUCL35			A0A0P0Y1N2	A0A0P0Y1N2_ORYSJ	unreviewed	Basic blue copper protein (Os11g0428800 protein)	LOC_Os11g24140 Os11g0428800 OsJ_33756	anchored component of plasma membrane [GO:0046658]; electron transfer activity [GO:0009055]		osa:4350388;	PF02298;
4607	LOC_Os05g37780	53.1266	5.41468	0.700386	2.48e-15	8.34e-14	expressed protein	Os05g0450300				Q53WQ2	Q53WQ2_ORYSJ	unreviewed	Os05g0450300 protein	Os05g0450300 B1122D01.12 OJ1576_F01.3	chloroplast [GO:0009507]		osa:4338958;
7427	LOC_Os10g34020	24.9029	5.41427	0.8901	7e-10	1.12e-08	glutathione S-transferase, putative, expressed	Os10g0481300	OsGSTU47			Q7XDA6	Q7XDA6_ORYSJ	unreviewed	Glutathione S-transferase, N-terminal domain containing protein, expressed (Os10g0481300 protein)	LOC_Os10g34020 Os10g0481300 OSNPB_100481300	cytoplasm [GO:0005737]; glutathione transferase activity [GO:0004364]; glutathione metabolic process [GO:0006749]			PF00043;PF02798;
1359	LOC_Os02g06560	4.21565	5.35995	2.63911	0.000223972	0.00129451	wound induced protein, putative, expressed	Os02g0160900				A0A0P0VEZ1	A0A0P0VEZ1_ORYSJ	unreviewed	Os02g0160900 protein	Os02g0160900			osa:9267626;	PF12609;
4373	LOC_Os05g15530	90.5741	5.34758	0.542628	1.06e-23	8.61e-22	aminotransferase domain containing protein, putative, expressed	Os05g0244700	OsAT-IV			A0A0P0WJP7	A0A0P0WJP7_ORYSJ	unreviewed	Os05g0244700 protein	Os05g0244700	cytosol [GO:0005829]; branched-chain-amino-acid transaminase activity [GO:0004084]; branched-chain amino acid biosynthetic process [GO:0009082]		osa:4338203;	PF01063;
7728	LOC_Os11g02770	4.13618	5.34533	2.61355	0.000199399	0.00116718	expressed protein	NA	NA			Q2RB93	Q2RB93_ORYSJ	unreviewed	Uncharacterized protein	LOC_Os11g02770				PF04525;
4347	LOC_Os05g11320	71.5555	5.32647	2.18412	0.000322101	0.0017894	metallothionein-like protein 3B, putative, expressed	Os05g0202800	MTd, OsMT-I-3b, OsMT3b, MT-I-3b, MT3b			B9FIL2	B9FIL2_ORYSJ	unreviewed	Uncharacterized protein	OsJ_17479
6478	LOC_Os08g32840	10.3998	5.32066	1.36918	5.46e-06	4.62e-05	bifunctional monodehydroascorbate reductase and carbonic anhydrasenectarin-3 precursor, putative, expressed	Os08g0424100	OsalphaCA5, alphaCA5			Q6YZ76	Q6YZ76_ORYSJ	unreviewed	Os08g0424100 protein (Putative dioscorin)	Os08g0424100 OSJNBa0056L09.26	carbonate dehydratase activity [GO:0004089]; zinc ion binding [GO:0008270]		osa:9267362;	PF00194;
2742	LOC_Os03g22590	4.09839	5.31557	2.61102	0.000208581	0.00121624	nodulin MtN3 family protein, putative, expressed	Os03g0347500	OsSWEET12			Q10LI8	SWT12_ORYSJ	reviewed	Bidirectional sugar transporter SWEET12 (OsSWEET12)	SWEET12 Os03g0347500 LOC_Os03g22590 OsJ_10824	integral component of membrane [GO:0016021]; integral component of plasma membrane [GO:0005887]; trans-Golgi network membrane [GO:0032588]; vesicle membrane [GO:0012506]; sucrose transmembrane transporter activity [GO:0008515]; sugar transmembrane transporter activity [GO:0051119]; carbohydrate transport [GO:0008643]; nectar secretion [GO:0071836]	SUBCELLULAR LOCATION: Cell membrane {ECO:0000250|UniProtKB:Q8L9J7}; Multi-pass membrane protein {ECO:0000250|UniProtKB:Q8L9J7}.	osa:4332825;	PF03083;
4640	LOC_Os05g39310	426.055	5.29681	2.06352	0.000198118	0.00115996	thiamine pyrophosphate enzyme, C-terminal TPP binding domain containing protein, expressed	Os05g0469600	pdc1*, pdc1, pdc4, pdc 1, PDC 1, RRJ2			B7EQR6	B7EQR6_ORYSJ	unreviewed	Pyruvate decarboxylase (cDNA clone:J023113E15, full insert sequence) (cDNA clone:J033033A07, full insert sequence)		carboxy-lyase activity [GO:0016831]; magnesium ion binding [GO:0000287]; thiamine pyrophosphate binding [GO:0030976]		osa:4339066;	PF02775;PF00205;PF02776;
7215	LOC_Os10g07400	123.053	5.28128	0.413854	6.05e-38	1.58e-35	disease resistance RPP13-like protein 1, putative, expressed	Os10g0161400				Q7G752	Q7G752_ORYSJ	unreviewed	NB-ARC domain containing protein, expressed (Os10g0161400 protein)	LOC_Os10g07400 Os10g0161400 OSNPB_100161400	ADP binding [GO:0043531]		osa:4348157;	PF00931;PF18052;
4359	LOC_Os05g12770	10.3362	5.26458	1.42937	1.22e-05	9.61e-05	NB-ARC domain containing protein, expressed	NA	NA			Q60E25	Q60E25_ORYSJ	unreviewed	Putative NBS-LRR-like protein	OSJNBb0012L23.12 OSJNOa0158O07.2	ADP binding [GO:0043531]			PF00931;PF18052;
3498	LOC_Os04g21130	40.8961	5.26229	0.662041	9.08e-16	3.24e-14	F-box protein PP2-B1, putative, expressed	Os04g0280500				Q7X867	Q7X867_ORYSJ	unreviewed	OSJNBa0079F16.17 protein (Os04g0280500 protein)	Os04g0280500 OSJNBa0079F16.17				PF14299;
6823	LOC_Os09g15480	28.2359	5.23809	0.785116	1.31e-11	2.68e-10	Ser/Thr-rich protein T10 in DGCR region, putative, expressed	Os09g0323500				Q6K2D5	Q6K2D5_ORYSJ	unreviewed	Os09g0323500 protein (cDNA clone:J023109A10, full insert sequence)	Os09g0323500 OSNPB_090323500			osa:4346725;	PF05742;
8160	LOC_Os11g45990	117.966	5.22712	0.456128	4.93e-31	7.9e-29	von Willebrand factor type A domain containing protein, putative, expressed	Os11g0687100				Q0IR21	Q0IR21_ORYSJ	unreviewed	Os11g0687100 protein	Os11g0687100			osa:4351146;	PF13768;PF14624;
1715	LOC_Os02g36110	92.3733	5.20189	0.463673	9.82e-30	1.38e-27	cytochrome P450, putative, expressed	Os02g0569900	OsCYP76M7, CYP76M10, OsCYP76M10			Q6YV99	Q6YV99_ORYSJ	unreviewed	Os02g0569900 protein (Putative Cyt-P450 monooxygenase)	Os02g0569900 OsJ_07204 OSJNBa0008E01.17 P0025F02.46	integral component of membrane [GO:0016021]; heme binding [GO:0020037]; iron ion binding [GO:0005506]; monooxygenase activity [GO:0004497]; oxidoreductase activity, acting on paired donors, with incorporation or reduction of molecular oxygen [GO:0016705]		osa:4329723;	PF00067;
369	LOC_Os01g21590	28.8298	5.20079	0.891568	1.14e-09	1.77e-08	homeodomain, putative, expressed	Os01g0318400	OsDLN9			Q94D75	Q94D75_ORYSJ	unreviewed	Uncharacterized protein	B1153F04.11 P0028G04.35
747	LOC_Os01g52340	38.4515	5.16309	0.664181	3.04e-15	1e-13	NB-ARC domain containing protein, expressed	Os01g0721400				Q8W0D5	Q8W0D5_ORYSJ	unreviewed	Os01g0721400 protein	Os01g0721400 OSNPB_010721400			osa:4324658;	PF18052;
5287	LOC_Os06g37280	3.87855	5.15807	2.64899	0.000355047	0.00194953	expressed protein	Os06g0569300				Q5Z5S2	Q5Z5S2_ORYSJ	unreviewed	Os06g0569300 protein	Os06g0569300 OSNPB_060569300
6531	LOC_Os08g36030	9.67847	5.14892	1.40138	1.25e-05	9.81e-05	plant viral response family protein, putative, expressed	Os08g0462800				A0A0P0XH27	A0A0P0XH27_ORYSJ	unreviewed	Os08g0462800 protein	Os08g0462800 B1111C03.20 B1116H04.8	integral component of membrane [GO:0016021]		osa:4345774;	PF04819;
6811	LOC_Os09g13440	9.29122	5.12789	1.37733	1.12e-05	8.89e-05	expressed protein	NA	NA			B9G2R4	B9G2R4_ORYSJ	unreviewed	Uncharacterized protein	OsJ_28778
4929	LOC_Os06g03520	635.847	5.12493	0.336053	1.14e-53	7.12e-51	DUF581 domain containing protein, expressed	Os06g0125200				A0A0P0WSC0	A0A0P0WSC0_ORYSJ	unreviewed	Os06g0125200 protein	Os06g0125200			osa:4339960;	PF04570;
6220	LOC_Os08g02700	124.844	5.1109	0.889351	4.42e-10	7.29e-09	fructose-bisphospate aldolase isozyme, putative, expressed	Os08g0120600				A0A0N7KP70	A0A0N7KP70_ORYSJ	unreviewed	Os08g0120600 protein (Putative fructose-bisphosphate aldolase)	Os08g0120600 B1203H11.11 OsJ_25856	cytosol [GO:0005829]; fructose-bisphosphate aldolase activity [GO:0004332]; fructose 1,6-bisphosphate metabolic process [GO:0030388]; glycolytic process [GO:0006096]		osa:4344545;	PF00274;
1719	LOC_Os02g36210	803.352	5.1098	0.674689	2.03e-15	6.91e-14	ent-kaurene synthase, chloroplast precursor, putative, expressed	Os02g0571100	OsCPS2, cps2, OsCPS2ent, CYC2, OsCyc2, OsCYC2, OsCPSL1, cpsl1, OsCyc2/OsCPS2, OsTPS7, Os-CPS2			C7IY39	C7IY39_ORYSJ	unreviewed	Os02g0571100 protein	Os02g0571100	magnesium ion binding [GO:0000287]; terpene synthase activity [GO:0010333]		osa:9266189;	PF01397;PF03936;
5412	LOC_Os06g45184	26.3676	5.09417	0.842522	4.27e-10	7.08e-09	retrotransposon protein, putative, Ty3-gypsy subclass, expressed	Os06g0662550				C7J1H9	C7J1H9_ORYSJ	unreviewed	Os04g0274700 protein	Os04g0274700
2140	LOC_Os02g55900	20.8908	5.08382	0.966598	3.94e-08	4.81e-07	expressed protein	NA	NA			Q69SK3	Q69SK3_ORYSJ	unreviewed	Uncharacterized protein P0689B12.16	P0689B12.16
7127	LOC_Os09g38380	20.1733	5.08245	0.914443	1.22e-08	1.61e-07	aspartic proteinase nepenthesin, putative, expressed	NA	NA			A0A0P0XRG2	A0A0P0XRG2_ORYSJ	unreviewed	Uncharacterized protein	OsJ_30294	extracellular region [GO:0005576]; aspartic-type endopeptidase activity [GO:0004190]; protein catabolic process [GO:0030163]; proteolysis [GO:0006508]		osa:107275332;	PF14541;PF14543;
5264	LOC_Os06g35560	25.5249	5.07024	0.804395	1.18e-10	2.11e-09	reticuline oxidase-like protein precursor, putative, expressed	Os06g0548200				Q5Z7I5	Q5Z7I5_ORYSJ	unreviewed	Os06g0548200 protein	Os06g0548200 OSNPB_060548200	FAD binding [GO:0071949]; oxidoreductase activity [GO:0016491]		osa:4341254;	PF08031;PF01565;
7536	LOC_Os10g38610	30.3383	5.04929	0.731743	2.06e-12	4.72e-11	glutathione S-transferase, putative, expressed	Os10g0529700	OsGSTU8, OsGST35, GST35			Q0IW72	Q0IW72_ORYSJ	unreviewed	Os10g0529700 protein (Fragment)	Os10g0529700				PF02798;
7015	LOC_Os09g31025	9.01615	5.01276	1.44071	2.8e-05	0.000203123	EF hand family protein, expressed	Os09g0483300				Q0J0U3	Q0J0U3_ORYSJ	unreviewed	Os09g0483300 protein	Os09g0483300 OSNPB_090483300	calcium ion binding [GO:0005509]		osa:4347410;	PF13499;
2106	LOC_Os02g54190	3.83821	5.0121	2.72678	0.000623498	0.00319121	pectinesterase, putative, expressed	Os02g0783000	OsPME9			A0A0P0VQA8	A0A0P0VQA8_ORYSJ	unreviewed	Os02g0783000 protein	Os02g0783000	integral component of membrane [GO:0016021]; aspartyl esterase activity [GO:0045330]; pectinesterase activity [GO:0030599]; pectinesterase inhibitor activity [GO:0046910]; cell wall modification [GO:0042545]; pectin catabolic process [GO:0045490]		osa:4330938;	PF01095;PF04043;
1718	LOC_Os02g36190	438.245	4.98121	0.615296	3.39e-17	1.41e-15	cytochrome P450, putative, expressed	Os02g0570700	Oscyp71Z7			Q6YV88	C71Z7_ORYSJ	reviewed	Ent-cassadiene hydroxylase (EC 1.14.14.69) (Cytochrome P450 71Z7)	CYP71Z7 Os02g0570700 LOC_Os02g36190 OsJ_07207 OSJNBa0008E01.37 P0689H05.7	integral component of membrane [GO:0016021]; membrane [GO:0016020]; heme binding [GO:0020037]; iron ion binding [GO:0005506]; oxidoreductase activity, acting on paired donors, with incorporation or reduction of molecular oxygen, NAD(P)H as one donor, and incorporation of one atom of oxygen [GO:0016709]; diterpenoid biosynthetic process [GO:0016102]; oxidation-reduction process [GO:0055114]	SUBCELLULAR LOCATION: Membrane {ECO:0000305}; Single-pass membrane protein {ECO:0000305}.	osa:4329726;	PF00067;
4966	LOC_Os06g05010	50.729	4.95863	1.20976	1.98e-06	1.82e-05	early nodulin 93 ENOD93 protein, putative, expressed	Os06g0142350	UDP-GT, OsENOD93-1			Q9SNR0	Q9SNR0_ORYSJ	unreviewed	Putative early nodulin	OsJ_20083 P0535G04.17	integral component of membrane [GO:0016021]		osa:9271477;	PF03386;
4967	LOC_Os06g05010	50.729	4.95863	1.20976	1.98e-06	1.82e-05	early nodulin 93 ENOD93 protein, putative, expressed	Os06g0142350	UDP-GT, OsENOD93-1			A0A0P0WST6	A0A0P0WST6_ORYSJ	unreviewed	Os06g0142350 protein	Os06g0142350 OSNPB_060142350	integral component of membrane [GO:0016021]			PF03386;
5482	LOC_Os06g48210	3.49228	4.95279	2.61464	0.000449	0.00239851	DEAD-box ATP-dependent RNA helicase, putative, expressed	Os06g0697200	OsRH35B			Q5Z6G5	RH35B_ORYSJ	reviewed	DEAD-box ATP-dependent RNA helicase 35B (EC 3.6.4.13)	Os06g0697200 LOC_Os06g48210 OsJ_22496 P0028E05.25	spliceosomal complex [GO:0005681]; ATP binding [GO:0005524]; metal ion binding [GO:0046872]; RNA binding [GO:0003723]; RNA helicase activity [GO:0003724]; mRNA splicing, via spliceosome [GO:0000398]		osa:4341945;	PF00270;PF00271;
303	LOC_Os01g16140	92.4238	4.94591	0.55388	3.27e-20	1.87e-18	expressed protein	Os01g0266400				A0A5S6R7Y2	A0A5S6R7Y2_ORYSJ	unreviewed	Os01g0266400 protein	Os01g0266400 OsJ_01219 P0011D01.3 P0499C11.31			osa:4324374;
1691	LOC_Os02g34790	13.3248	4.93367	1.09008	2.79e-06	2.51e-05	receptor-like protein kinase 5 precursor, putative, expressed	Os02g0553000				A0A0N7KFG9	A0A0N7KFG9_ORYSJ	unreviewed	Uncharacterized protein	OsJ_07112	integral component of membrane [GO:0016021]; plasma membrane [GO:0005886]; ATP binding [GO:0005524]; protein kinase activity [GO:0004672]; hormone-mediated signaling pathway [GO:0009755]			PF00069;
2868	LOC_Os03g37290	8.53559	4.92841	1.45827	4.15e-05	0.000289617	cytochrome P450, putative, expressed	Os03g0570100				Q0DQQ7	Q0DQQ7_ORYSJ	unreviewed	Os03g0570100 protein	Os03g0570100	integral component of membrane [GO:0016021]; membrane [GO:0016020]; heme binding [GO:0020037]; iron ion binding [GO:0005506]; oxidoreductase activity, acting on paired donors, with incorporation or reduction of molecular oxygen, NAD(P)H as one donor, and incorporation of one atom of oxygen [GO:0016709]			PF00067;
1720	LOC_Os02g36280	53.3716	4.92838	0.599629	3.75e-17	1.56e-15	cytochrome P450, putative, expressed	Os02g0571900	OsCYP76M6			Q6Z5I7	C76M6_ORYSJ	reviewed	Oryzalexin E synthase (EC 1.14.14.122) (Cytochrome P450 76M6)	CYP76M6 Os02g0571900 LOC_Os02g36280 OsJ_07213 P0689H05.39	integral component of membrane [GO:0016021]; membrane [GO:0016020]; 3alpha-hydroxy-ent-sandaracopimardiene 9-beta-monooxygenase activity [GO:0102597]; heme binding [GO:0020037]; iron ion binding [GO:0005506]; monooxygenase activity [GO:0004497]; oxidoreductase activity, acting on paired donors, with incorporation or reduction of molecular oxygen, NAD(P)H as one donor, and incorporation of one ato…	SUBCELLULAR LOCATION: Membrane {ECO:0000255}; Single-pass membrane protein {ECO:0000255}.	osa:4329730;	PF00067;
3474	LOC_Os04g15530	3.48091	4.92055	2.63334	0.000514823	0.00270265	retrotransposon protein, putative, Ty1-copia subclass, expressed	Os04g0226340				C7J1G4	C7J1G4_ORYSJ	unreviewed	Os04g0226340 protein (Fragment)	Os04g0226340				PF13855;PF08263;
3521	LOC_Os04g27060	1410.87	4.91174	0.183707	6.68e-159	8.13e-155	oxidoreductase, aldo/keto reductase family protein, putative, expressed	Os04g0339400	OsAKR, AKR			Q7XQ45	AKR3_ORYSJ	reviewed	Probable aldo-keto reductase 3 (EC 1.1.1.-)	Os04g0339400 LOC_Os04g27060 OsJ_14323 OSJNBa0032I19.9	oxidoreductase activity [GO:0016491]		osa:4335515;	PF00248;
1566	LOC_Os02g20320	8.56999	4.90272	1.47588	5e-05	0.000343412	OsSAUR7 - Auxin-responsive SAUR gene family member, expressed	Os02g0305950	OsSAUR7			Q6K2Z2	Q6K2Z2_ORYSJ	unreviewed	Os02g0305950 protein	Os02g0305950 OSNPB_020305950	response to auxin [GO:0009733]		osa:9267829;	PF02519;
4968	LOC_Os06g05020	50.2332	4.90155	0.743431	3.97e-12	8.77e-11	early nodulin 93 ENOD93 protein, putative, expressed	Os06g0142400	OsENOD93, ENOD93			Q9SNQ9	Q9SNQ9_ORYSJ	unreviewed	Os06g0142400 protein (cDNA, clone: J065127G01, full insert sequence)	Os06g0142400 OSNPB_060142400	integral component of membrane [GO:0016021]		osa:4340085;	PF03386;
4206	LOC_Os05g02390	239.044	4.89161	0.364103	4.56e-42	1.56e-39	ZOS5-02 - C2H2 zinc finger protein, expressed	Os05g0114400	OsDLN129			B9FKB9	B9FKB9_ORYSJ	unreviewed	Os05g0114400 protein (Putative C2H2 type zinc finger transcription factor ZFP16) (Putative zinc finger protein)	Os05g0114400 OJ1654_B10.5 OsJ_16882 OSJNBb0041A22.16	nucleic acid binding [GO:0003676]		osa:4337609;
109	LOC_Os01g06310	215.367	4.86901	0.291487	2.42e-63	2.68e-60	glycine-rich cell wall structural protein precursor, putative, expressed	Os01g0155800				A0A0N7KCD1	A0A0N7KCD1_ORYSJ	unreviewed	Os01g0155800 protein	Os01g0155800 OsJ_00435 P0011G08.23			osa:4324081;
1446	LOC_Os02g11790	8.49052	4.86582	1.49541	6.3e-05	0.000419545	OsFBK4 - F-box domain and kelch repeat containing protein, expressed	Os02g0208700	OsKMD1, OsFbox074, OsFbox74, Os_F0323			C7IY44	C7IY44_ORYSJ	unreviewed	Os02g0208700 protein	Os02g0208700				PF01344;
2915	LOC_Os03g42259	103.286	4.85591	0.418844	5.48e-32	9.66e-30	hypervariable Bacillus group-specific protein, putative, expressed	Os03g0619875				A0A0P0W0V0	A0A0P0W0V0_ORYSJ	unreviewed	Os03g0619875 protein	Os03g0619875
5618	LOC_Os07g03900	3.39501	4.84364	2.65373	0.00064032	0.00326797	lectin-like receptor kinase, putative, expressed	NA	NA			Q8H4I1	Q8H4I1_ORYSJ	unreviewed	Os07g0131100 protein (Putative receptor-type protein kinase LRK1)	OJ1606_D04.102 Os07g0131100 OsJ_22976 OSJNBa0088O14.39	integral component of membrane [GO:0016021]; ATP binding [GO:0005524]; carbohydrate binding [GO:0030246]; protein kinase activity [GO:0004672]			PF00139;PF00069;
5254	LOC_Os06g34560	7.96898	4.8352	1.41653	3.85e-05	0.000271233	zinc finger, C3HC4 type domain containing protein, expressed	Os06g0536600				A0A0P0WXH4	A0A0P0WXH4_ORYSJ	unreviewed	Os06g0536600 protein (Fragment)	Os06g0536600 OSNPB_060536600	integral component of membrane [GO:0016021]; ubiquitin protein ligase activity [GO:0061630]; ubiquitin-dependent protein catabolic process [GO:0006511]			PF13639;
7052	LOC_Os09g32770	12.5477	4.8344	1.07322	3.15e-06	2.8e-05	auxin efflux carrier component, putative, expressed	Os09g0505400	PIN5B, OsPIN5b, OsPIN5c			A3C0E9	A3C0E9_ORYSJ	unreviewed	Uncharacterized protein	OsJ_29930	integral component of membrane [GO:0016021]; transmembrane transport [GO:0055085]			PF03547;
8179	LOC_Os11g47580	18.9446	4.83172	1.06652	8.25e-07	8.12e-06	glycosyl hydrolase, putative, expressed	Os11g0701800	C10701			Q7GCM7	XIP1_ORYSJ	reviewed	Xylanase inhibitor protein 1 (XIP-I) (Class III chitinase homolog a) (RIXI protein)	RIXI Chib3H-a Os11g0701800 LOC_Os11g47580 OsJ_34838	extracellular region [GO:0005576]; chitinase activity [GO:0004568]; enzyme inhibitor activity [GO:0004857]; carbohydrate metabolic process [GO:0005975]; defense response to fungus [GO:0050832]	SUBCELLULAR LOCATION: Secreted {ECO:0000305}.	osa:4351194;	PF00704;
7909	LOC_Os11g14910	967.02	4.82615	0.305468	1.61e-57	1.23e-54	NADP-dependent oxidoreductase, putative, expressed	Os11g0255500				Q53LC7	Q53LC7_ORYSJ	unreviewed	NADP-dependent oxidoreductase P1, putative, expressed (Os11g0255500 protein)	LOC_Os11g14910 Os11g0255500 OSNPB_110255500	oxidoreductase activity [GO:0016491]		osa:4350217;	PF16884;PF00107;
5874	LOC_Os07g34520	14.0012	4.8152	1.33511	4.64e-05	0.000320986	isocitrate lyase, putative, expressed	Os07g0529000	OsEnS-107, EnS-107, OsI85, I85, OsICL, Osl85, l43, Osl43, OsL85			A1YZC8	A1YZC8_ORYSJ	unreviewed	Isocitrate lyase		isocitrate lyase activity [GO:0004451]; metal ion binding [GO:0046872]; carboxylic acid metabolic process [GO:0019752]			PF00463;
5875	LOC_Os07g34520	14.0012	4.8152	1.33511	4.64e-05	0.000320986	isocitrate lyase, putative, expressed	Os07g0529000	OsEnS-107, EnS-107, OsI85, I85, OsICL, Osl85, l43, Osl43, OsL85			A0A0A0QMT5	A0A0A0QMT5_ORYSJ	unreviewed	Isocitrate lyase		isocitrate lyase activity [GO:0004451]; metal ion binding [GO:0046872]; carboxylic acid metabolic process [GO:0019752]		osa:4343441;	PF00463;
5247	LOC_Os06g33200	57.4134	4.77714	0.52033	7.73e-21	4.69e-19	expressed protein	Os06g0523300				Q0DBV7	Q0DBV7_ORYSJ	unreviewed	Os06g0523300 protein	Os06g0523300 OSNPB_060523300			osa:4341174;
1649	LOC_Os02g32140	34.4856	4.76752	0.634892	1.61e-14	4.87e-13	AP2 domain containing protein, expressed	Os02g0521100	OsERF#107, OsERF107, AP2/EREBP#015, AP2/EREBP15			B9F0A5	B9F0A5_ORYSJ	unreviewed	Uncharacterized protein	OsJ_06940	membrane [GO:0016020]; nucleus [GO:0005634]; 2 iron, 2 sulfur cluster binding [GO:0051537]; DNA binding [GO:0003677]; DNA-binding transcription factor activity [GO:0003700]; ubiquinol-cytochrome-c reductase activity [GO:0008121]	SUBCELLULAR LOCATION: Nucleus {ECO:0000256|SAAS:SAAS00550310}.		PF00847;PF00355;PF02921;
5998	LOC_Os07g41350	393.025	4.76019	0.3165	2.44e-52	1.38e-49	B12D protein, putative, expressed	Os07g0604700	OsB12D1			Q6Z4G4	Q6Z4G4_ORYSJ	unreviewed	Os07g0604700 protein (cDNA, clone: J065216A09, full insert sequence)	Os07g0604700 OSNPB_070604700	integral component of membrane [GO:0016021]		osa:4343848;	PF06522;
4960	LOC_Os06g04940	11.9752	4.75294	1.10124	6.4e-06	5.33e-05	early nodulin 93 ENOD93 protein, putative, expressed	Os06g0141600	OsENOD93			Q9SNR7	Q9SNR7_ORYSJ	unreviewed	Putative early nodulin	P0535G04.9-1	integral component of membrane [GO:0016021]		osa:4340079;	PF03386;
4961	LOC_Os06g04940	11.9752	4.75294	1.10124	6.4e-06	5.33e-05	early nodulin 93 ENOD93 protein, putative, expressed	Os06g0141600	OsENOD93			A0A0P0WSA5	A0A0P0WSA5_ORYSJ	unreviewed	Os06g0141600 protein	Os06g0141600	integral component of membrane [GO:0016021]			PF03386;
7252	LOC_Os10g13700	2888.49	4.73893	0.257926	1.76e-76	3.9e-73	phosphoenolpyruvate carboxykinase, putative, expressed	NA	NA			Q109X4	Q109X4_ORYSJ	unreviewed	Phosphoenolpyruvate carboxykinase, putative, expressed	LOC_Os10g13700	ATP binding [GO:0005524]; kinase activity [GO:0016301]; phosphoenolpyruvate carboxykinase (ATP) activity [GO:0004612]; gluconeogenesis [GO:0006094]			PF01293;
5757	LOC_Os07g15940	16.1133	4.7218	0.953951	2.36e-07	2.56e-06	legume lectins beta domain containing protein, expressed	Os07g0262800				B7F5M1	B7F5M1_ORYSJ	unreviewed	cDNA clone:J013038K24, full insert sequence		integral component of membrane [GO:0016021]; ATP binding [GO:0005524]; carbohydrate binding [GO:0030246]; protein kinase activity [GO:0004672]			PF00139;
1741	LOC_Os02g37380	17.6602	4.70867	1.09678	2.32e-06	2.12e-05	expressed protein	Os02g0586000				A3A8G1	A3A8G1_ORYSJ	unreviewed	Os02g0586000 protein	Os02g0586000 OsJ_07300 OSJNBb0056I22.23
8021	LOC_Os11g32210	24.9087	4.70501	0.805545	1.09e-09	1.68e-08	jacalin-like lectin domain containing protein, expressed	Os11g0524900	OsSTA260			Q2R3E5	Q2R3E5_ORYSJ	unreviewed	Jacalin-like lectin domain containing protein, expressed	LOC_Os11g32210	ADP binding [GO:0043531]; carbohydrate binding [GO:0030246]			PF01419;PF00931;PF18052;
7191	LOC_Os10g04490	23.8512	4.67588	0.73592	7.1e-11	1.32e-09	expressed protein	NA	NA			Q948E0	Q948E0_ORYSJ	unreviewed	Uncharacterized protein	LOC_Os10g04490
8077	LOC_Os11g37210	15.5384	4.66651	0.932627	1.89e-07	2.08e-06	MTN26L5 - MtN26 family protein precursor, expressed	Os11g0582000				A0A0P0Y3U9	A0A0P0Y3U9_ORYSJ	unreviewed	Os11g0582000 protein	Os11g0582000 OSNPB_110582000	integral component of membrane [GO:0016021]		osa:107276261;
4034	LOC_Os04g54220	37.3329	4.66281	0.734436	2.97e-11	5.81e-10	expressed protein	Os04g0634900				Q7XQT0	Q7XQT0_ORYSJ	unreviewed	Os04g0634900 protein	Os04g0634900 OSNPB_040634900
8698	LOC_Os12g44350	190.802	4.61638	0.995526	1.61e-07	1.8e-06	actin, putative, expressed	NA	NA			Q2QLI5	Q2QLI5_ORYSJ	unreviewed	Actin-1, putative, expressed	LOC_Os12g44350	cytoplasm [GO:0005737]; cytoskeleton [GO:0005856]; ATP binding [GO:0005524]	SUBCELLULAR LOCATION: Cytoplasm, cytoskeleton {ECO:0000256|SAAS:SAAS00092513}.		PF00022;
4392	LOC_Os05g18090	11.4227	4.61597	1.1209	1.13e-05	9e-05	SHR5-receptor-like kinase, putative, expressed	NA	NA			B9FEA8	B9FEA8_ORYSJ	unreviewed	Protein kinase domain-containing protein	OsJ_14169	integral component of membrane [GO:0016021]; ATP binding [GO:0005524]; protein kinase activity [GO:0004672]			PF11721;PF00069;
6624	LOC_Os08g40690	69.1726	4.6049	0.541474	1.61e-18	7.8e-17	glycosyl hydrolase, putative, expressed	Os08g0518900	C10122			O49825	O49825_ORYSJ	unreviewed	Chitinase (EC 3.2.1.14) (Os08g0518900 protein)	Os08g0518900 OSNPB_080518900	extracellular region [GO:0005576]; chitinase activity [GO:0004568]; carbohydrate metabolic process [GO:0005975]		osa:4346052;	PF00704;
3440	LOC_Os04g09920	902.694	4.60279	0.304679	1e-52	5.95e-50	cytochrome P450, putative, expressed	Os04g0178400				Q0JF01	C99A3_ORYSJ	reviewed	9-beta-pimara-7,15-diene oxidase (EC 1.14.14.111) (Cytochrome P450 99A3)	CYP99A3 Os04g0178400 LOC_Os04g09920 OsJ_013415 OSJNBa0096F01.14	integral component of membrane [GO:0016021]; membrane [GO:0016020]; 9beta-pimara-7,15-diene oxidase activity [GO:0036209]; heme binding [GO:0020037]; iron ion binding [GO:0005506]; oxidoreductase activity, acting on paired donors, with incorporation or reduction of molecular oxygen, NAD(P)H as one donor, and incorporation of one atom of oxygen [GO:0016709]; cellular response to jasmonic acid stim…	SUBCELLULAR LOCATION: Membrane {ECO:0000305}; Multi-pass membrane protein {ECO:0000305}.	osa:4335091;	PF00067;
4964	LOC_Os06g04990	83.9317	4.58709	0.477546	6.63e-23	5e-21	early nodulin 93 ENOD93 protein, putative, expressed	Os06g0142200	OsENOD93a			A0A5S6RDN3	A0A5S6RDN3_ORYSJ	unreviewed	Os06g0142200 protein (Putative early nodulin)	P0535G04.15-1 Os06g0142200	integral component of membrane [GO:0016021]		osa:4340083;	PF03386;
7538	LOC_Os10g38660	7.19417	4.56053	1.5097	0.0001434	0.000868656	glutathione S-transferase, putative, expressed	NA	NA			Q8S714	Q8S714_ORYSJ	unreviewed	Glutathione S-transferase GSTU6, putative	LOC_Os10g38660	transferase activity [GO:0016740]			PF02798;
211	LOC_Os01g10400	913.698	4.54581	1.20278	6.27e-06	5.23e-05	expressed protein	Os01g0200700	OsMT3a, MT3a, OsMT-I-3a, MT-I-3a, MTe, met2, OsMT3, MT3, OsMTI-3a, MTI-3a			B0FFN3	B0FFN3_ORYSJ	unreviewed	Metallothionein (Metallothionein-like protein)
7867	LOC_Os11g10520	658.265	4.5373	0.340586	1.14e-41	3.8e-39	dehydrogenase, putative, expressed	Os11g0210600	Adh3			H2KVY6	H2KVY6_ORYSJ	unreviewed	Alcohol dehydrogenase 2, putative, expressed	LOC_Os11g10520	oxidoreductase activity [GO:0016491]; zinc ion binding [GO:0008270]			PF08240;PF00107;
7868	LOC_Os11g10520	658.265	4.5373	0.340586	1.14e-41	3.8e-39	dehydrogenase, putative, expressed	Os11g0210600	Adh3			Q2R8Z1	Q2R8Z1_ORYSJ	unreviewed	Alcohol dehydrogenase 2, putative, expressed (Alcohol dehydrogenase 3)	Adh3 LOC_Os11g10520	oxidoreductase activity [GO:0016491]; zinc ion binding [GO:0008270]		osa:4350055;	PF08240;PF00107;
3444	LOC_Os04g10160	277.836	4.53024	0.33409	3.96e-43	1.44e-40	cytochrome P450, putative, expressed	Os04g0180400	CYP99A2			Q7X7X4	C99A2_ORYSJ	reviewed	Cytochrome P450 99A2 (EC 1.14.-.-)	CYP99A2 Os04g0180400 LOC_Os04g10160 OSJNBa0027O01.2 OSJNBa0052P16.24	integral component of membrane [GO:0016021]; membrane [GO:0016020]; heme binding [GO:0020037]; iron ion binding [GO:0005506]; oxidoreductase activity, acting on paired donors, with incorporation or reduction of molecular oxygen, NAD(P)H as one donor, and incorporation of one atom of oxygen [GO:0016709]; defense response [GO:0006952]	SUBCELLULAR LOCATION: Membrane {ECO:0000305}; Multi-pass membrane protein {ECO:0000305}.	osa:4335096;	PF00067;
5734	LOC_Os07g12890	88.9892	4.52279	0.373898	2.48e-34	5.11e-32	metal cation transporter, putative, expressed	Os07g0232800	OsZIP8, OsZIP1			E3WCP1	E3WCP1_ORYSJ	unreviewed	Zinc transporter	OsZIP8	integral component of membrane [GO:0016021]; zinc ion transmembrane transporter activity [GO:0005385]	SUBCELLULAR LOCATION: Membrane {ECO:0000256|RuleBase:RU362088}; Multi-pass membrane protein {ECO:0000256|RuleBase:RU362088}.	osa:4342782;	PF02535;
763	LOC_Os01g52900	21.9388	4.51237	0.758849	6.46e-10	1.04e-08	expressed protein	Os01g0729600				Q9AX15	Q9AX15_ORYSJ	unreviewed	Os01g0729600 protein	Os01g0729600 OSNPB_010729600	transaminase activity [GO:0008483]		osa:4323929;	PF00266;
3157	LOC_Os03g55770	66.6111	4.49824	0.489852	5.73e-21	3.53e-19	expressed protein	Os03g0766600				Q9AYP3	Q9AYP3_ORYSJ	unreviewed	Expressed protein (Os03g0766600 protein) (cDNA clone:001-122-B04, full insert sequence) (cDNA clone:J023133G21, full insert sequence) (mRNA, relating to carbonate stress)	LOC_Os03g55770 Os03g0766600 OSNPB_030766600
5701	LOC_Os07g09190	441.935	4.49167	0.284601	2.87e-57	2.05e-54	transketolase, putative, expressed	Os07g0190000	OsDXS, OsDXS3, dxs3, DXS2, OsDXS2			Q6YU51	DXS2_ORYSJ	reviewed	Probable 1-deoxy-D-xylulose-5-phosphate synthase 2, chloroplastic (1-deoxyxylulose-5-phosphate synthase) (DXP synthase) (DXPS) (EC 2.2.1.7)	Os07g0190000 LOC_Os07g09190 OsJ_23394 OSJNBb0002L09.31 OSJNBb0003E08.7	chloroplast [GO:0009507]; 1-deoxy-D-xylulose-5-phosphate synthase activity [GO:0008661]; metal ion binding [GO:0046872]; transferase activity, transferring aldehyde or ketonic groups [GO:0016744]; 1-deoxy-D-xylulose 5-phosphate biosynthetic process [GO:0052865]; terpenoid biosynthetic process [GO:0016114]; thiamine biosynthetic process [GO:0009228]	SUBCELLULAR LOCATION: Plastid, chloroplast {ECO:0000250}.	osa:4342614;	PF13292;PF02779;PF02780;
4335	LOC_Os05g10650	351.354	4.47599	0.369236	4.43e-35	9.29e-33	6-phosphofructokinase, putative, expressed	Os05g0194900	OsPPi-PFK, OsPFK04, PFK04, PFK4			Q6L4N6	Q6L4N6_ORYSJ	unreviewed	ATP-dependent 6-phosphofructokinase (ATP-PFK) (Phosphofructokinase) (EC 2.7.1.11) (Phosphohexokinase)	PFK OsJ_17437 P0473H02.6 P0681D04.18	cytoplasm [GO:0005737]; 6-phosphofructokinase activity [GO:0003872]; ATP binding [GO:0005524]; metal ion binding [GO:0046872]; fructose 6-phosphate metabolic process [GO:0006002]	SUBCELLULAR LOCATION: Cytoplasm {ECO:0000256|HAMAP-Rule:MF_03186}.	osa:4338034;	PF00365;
2958	LOC_Os03g45250	132.725	4.46877	0.477969	7.61e-22	5.1e-20	2-aminoethanethiol dioxygenase, putative, expressed	Os03g0655100				Q84SU3	Q84SU3_ORYSJ	unreviewed	Expressed protein	LOC_Os03g45250	oxidoreductase activity, acting on single donors with incorporation of molecular oxygen, incorporation of two atoms of oxygen [GO:0016702]		osa:9266373;	PF07847;
7192	LOC_Os10g04510	13.712	4.45019	0.970557	1.2e-06	1.15e-05	expressed protein	Os10g0134500				Q948D9	Q948D9_ORYSJ	unreviewed	Expressed protein	LOC_Os10g04510
7351	LOC_Os10g26700	82.2339	4.45003	1.35526	3.85e-05	0.000271127	YGL010w, putative, expressed	Os10g0407200				Q338F7	Q338F7_ORYSJ	unreviewed	Os10g0407200 protein (YGL010w, putative, expressed)	LOC_Os10g26700 Os10g0407200 OSNPB_100407200	integral component of membrane [GO:0016021]; sphingoid catabolic process [GO:0046521]			PF06127;
7352	LOC_Os10g26700	82.2339	4.45003	1.35526	3.85e-05	0.000271127	YGL010w, putative, expressed	Os10g0407200				A0A5S6RCX4	A0A5S6RCX4_ORYSJ	unreviewed	Uncharacterized protein OSJNBa0060A14.19	OSJNBa0060A14.19	integral component of membrane [GO:0016021]		osa:4348591;	PF06127;
3990	LOC_Os04g52280	21.4584	4.44101	0.851427	2.84e-08	3.53e-07	dehydrogenase, putative, expressed	Os04g0612700	OsCAD7, fc1, CAD7			Q0JA75	CADH7_ORYSJ	reviewed	Cinnamyl alcohol dehydrogenase 7 (OsCAD7) (EC 1.1.1.195) (Protein FLEXIBLE CULM 1)	CAD7 FC1 Os04g0612700 LOC_Os04g52280 OSJNBa0070C17.13	cinnamyl-alcohol dehydrogenase activity [GO:0045551]; oxidoreductase activity, acting on the CH-OH group of donors, NAD or NADP as acceptor [GO:0016616]; sinapyl alcohol dehydrogenase activity [GO:0052747]; zinc ion binding [GO:0008270]; lignin biosynthetic process [GO:0009809]		osa:4336968;	PF08240;PF00107;
6548	LOC_Os08g37470	13.9602	4.43802	1.00906	2.3e-06	2.1e-05	2-aminoethanethiol dioxygenase, putative, expressed	Os08g0480400				Q6Z242	Q6Z242_ORYSJ	unreviewed	Os08g0480400 protein (cDNA, clone: J065214F15, full insert sequence)	Os08g0480400 OSNPB_080480400	oxidoreductase activity, acting on single donors with incorporation of molecular oxygen, incorporation of two atoms of oxygen [GO:0016702]			PF07847;
6853	LOC_Os09g19800	87.7044	4.43298	0.39376	3.78e-30	5.47e-28	aminopeptidase, putative, expressed	NA	NA			Q6K4E7	APM1D_ORYSJ	reviewed	Aminopeptidase M1-D (EC 3.4.11.2) (Alpha-aminoacylpeptide hydrolase)	Os09g0362800 LOC_Os09g19800/LOC_Os09g19820 OJ1506_A04.11	cytoplasm [GO:0005737]; endoplasmic reticulum [GO:0005783]; organelle membrane [GO:0031090]; metalloaminopeptidase activity [GO:0070006]; peptide binding [GO:0042277]; zinc ion binding [GO:0008270]; peptide catabolic process [GO:0043171]; proteolysis [GO:0006508]	SUBCELLULAR LOCATION: Membrane {ECO:0000250}; Peripheral membrane protein {ECO:0000250}. Microsome membrane {ECO:0000250}; Peripheral membrane protein {ECO:0000250}. Cytoplasm {ECO:0000250}. Note=The dileucine internalization motif may be involved in intracellular sequestration.	osa:4346856;	PF11838;PF01433;
1116	LOC_Os01g68300	425.367	4.41752	0.845089	8.97e-09	1.2e-07	expressed protein	Os01g0910900				Q5N7Y1	Q5N7Y1_ORYSJ	unreviewed	Os01g0910900 protein (cDNA, clone: J053089D02, full insert sequence)	Os01g0910900 OSNPB_010910900			osa:4324873;
6112	LOC_Os07g46846	95.5476	4.41385	0.455831	3.44e-23	2.64e-21	sex determination protein tasselseed-2, putative, expressed	Os07g0663700	OsSDR110C-MI3, SDR110C-MI3			A0A0P0XA86	A0A0P0XA86_ORYSJ	unreviewed	Os07g0663700 protein (Fragment)	Os07g0663700 OSNPB_070663700
1984	LOC_Os02g49720	141.425	4.40523	0.30365	1.8e-48	8.59e-46	aldehyde dehydrogenase, putative, expressed	Os02g0730000	OsALDH2a, ALDH2a, Aldh2a, OsSTA73, OsALDH2B5, ALDH2B5			Q6YWQ9	Q6YWQ9_ORYSJ	unreviewed	cDNA clone:001-130-H10, full insert sequence		oxidoreductase activity, acting on the aldehyde or oxo group of donors, NAD or NADP as acceptor [GO:0016620]			PF00171;
1985	LOC_Os02g49720	141.425	4.40523	0.30365	1.8e-48	8.59e-46	aldehyde dehydrogenase, putative, expressed	Os02g0730000	OsALDH2a, ALDH2a, Aldh2a, OsSTA73, OsALDH2B5, ALDH2B5			Q9LRI6	Q9LRI6_ORYSJ	unreviewed	Mitochondrial aldehyde dehydrogenase ALDH2a (Os02g0730000 protein) (cDNA clone:J033042M19, full insert sequence)	Aldh2a Os02g0730000 OSNPB_020730000	aldehyde dehydrogenase (NAD+) activity [GO:0004029]		osa:4330612;	PF00171;
3460	LOC_Os04g11430	131.007	4.36832	0.353313	6.56e-36	1.44e-33	disease resistance RPP13-like protein 1, putative, expressed	NA	NA			Q7XX49	Q7XX49_ORYSJ	unreviewed	OSJNBa0059D20.15 protein	OsJ_13929 OSJNBa0059D20.15	ADP binding [GO:0043531]			PF00931;PF18052;
1714	LOC_Os02g36070	38.5566	4.35803	1.34442	4.8e-05	0.000330734	cytochrome P450, putative, expressed	Os02g0569400	CYP76M8			Q6YTF1	C76M8_ORYSJ	reviewed	Oryzalexin D synthase (EC 1.14.14.112) (EC 1.14.14.123) (Cytochrome P450 76M8) (Ent-cassadiene C11-alpha-hydroxylase 2)	CYP76M8 Os02g0569400 LOC_Os02g36070 OsJ_07203 OSJNBa0008E01.2 P0025F02.31	integral component of membrane [GO:0016021]; membrane [GO:0016020]; 3alpha-hydroxy-ent-sandaracopimardiene 7-beta-monooxygenase activity [GO:0102598]; ent-cassa-12,15-diene 11-hydroxylase activity [GO:0036202]; heme binding [GO:0020037]; iron ion binding [GO:0005506]; monooxygenase activity [GO:0004497]; oxidoreductase activity, acting on paired donors, with incorporation or reduction of molecula…	SUBCELLULAR LOCATION: Membrane {ECO:0000305}; Single-pass membrane protein {ECO:0000305}.	osa:4329722;	PF00067;
4559	LOC_Os05g35050	20.4839	4.348	0.821882	1.76e-08	2.26e-07	ctr copper transporter family protein, putative, expressed	Os05g0424700	COPT5, OsCOPT5			E3SC18	E3SC18_ORYSJ	unreviewed	Copper transport protein COPT5		integral component of membrane [GO:0016021]; copper ion transmembrane transporter activity [GO:0005375]		osa:4338846;	PF04145;
6860	LOC_Os09g20220	247.235	4.33228	0.319622	4.13e-43	1.48e-40	glutathione S-transferase, putative, expressed	Os09g0367700	OsGSTU5			Q9FUE5	Q9FUE5_ORYSJ	unreviewed	Putative glutathione S-transferase OsGSTU5 (cDNA clone:J033125H12, full insert sequence)		transferase activity [GO:0016740]		osa:4346877;	PF02798;
7926	LOC_Os11g16590	2.78524	4.29375	2.71144	0.00166028	0.00750459	ATP-dependent Clp protease ATP-binding subunit clpA homolog CD4B,chloroplast precursor, putative, expressed	Os11g0267400	ClpC3			Q53LY0	CLPC3_ORYSJ	reviewed	Chaperone protein ClpC3, chloroplastic (ATP-dependent Clp protease ATP-binding subunit ClpC homolog 3) (Casein lytic proteinase C3)	CLPC3 Os11g0267400 LOC_Os11g16590	chloroplast [GO:0009507]; ATP binding [GO:0005524]; protein metabolic process [GO:0019538]	SUBCELLULAR LOCATION: Plastid, chloroplast {ECO:0000305}.	osa:4350258;	PF00004;PF07724;PF17871;PF02861;PF10431;
1716	LOC_Os02g36140	789.037	4.2796	0.326286	1.89e-40	5.97e-38	terpene synthase, putative, expressed	NA	NA			Q0E088	KSL7_ORYSJ	reviewed	Ent-cassa-12,15-diene synthase (EC 4.2.3.28) (Diterpene cyclase 1) (OsDTC1) (Ent-kaurene synthase-like 7) (OsKSL7) (OsKS3)	KSL7 DTC1 Os02g0570400 LOC_Os02g36140 OsJ_006992 OSJNBa0008E01.23	ent-cassa-12,15-diene synthase activity [GO:0034277]; magnesium ion binding [GO:0000287]; terpene synthase activity [GO:0010333]; defense response [GO:0006952]; diterpenoid biosynthetic process [GO:0016102]		osa:4329724;	PF01397;PF03936;
1713	LOC_Os02g36030	9.16478	4.27847	1.14133	4.86e-05	0.000334386	cytochrome P450, putative, expressed	Os02g0569000	CYP76M5			Q6YTF5	C76M5_ORYSJ	reviewed	Cytochrome P450 76M5 (EC 1.14.14.122)	CYP76M5 Os02g0569000 LOC_Os02g36030 OsJ_07201 P0025F02.20	integral component of membrane [GO:0016021]; membrane [GO:0016020]; 3alpha-hydroxy-ent-sandaracopimardiene 9-beta-monooxygenase activity [GO:0102597]; heme binding [GO:0020037]; iron ion binding [GO:0005506]; monooxygenase activity [GO:0004497]; oxidoreductase activity, acting on paired donors, with incorporation or reduction of molecular oxygen, NAD(P)H as one donor, and incorporation of one ato…	SUBCELLULAR LOCATION: Membrane {ECO:0000255}; Single-pass membrane protein {ECO:0000255}.	osa:4329721;	PF00067;
1773	LOC_Os02g38930	15.8941	4.27798	0.894428	3.27e-07	3.46e-06	cytochrome P450 71D7, putative, expressed	NA	NA			Q0DZS5	Q0DZS5_ORYSJ	unreviewed	Os02g0601400 protein	Os02g0601400	heme binding [GO:0020037]; iron ion binding [GO:0005506]; monooxygenase activity [GO:0004497]; oxidoreductase activity, acting on paired donors, with incorporation or reduction of molecular oxygen [GO:0016705]			PF00067;
8555	LOC_Os12g36880	1598.13	4.27188	0.547433	3.76e-16	1.4e-14	pathogenesis-related Bet v I family protein, putative, expressed	Os12g0555500	PBZ1, OsPR10a, RPR10a, PR-10a, PR10a, PR10, OsPR10A, OsPR-10a, OsPR10, PR10/PBZ1, OsPBZ1, OsPR10a/PBZ1			B9GDP9	B9GDP9_ORYSJ	unreviewed	Os12g0555500 protein	Os12g0555500 OsJ_36471	cytoplasm [GO:0005737]; nucleus [GO:0005634]; abscisic acid binding [GO:0010427]; protein phosphatase inhibitor activity [GO:0004864]; signaling receptor activity [GO:0038023]; abscisic acid-activated signaling pathway [GO:0009738]; defense response [GO:0006952]; regulation of protein serine/threonine phosphatase activity [GO:0080163]		osa:4352491;	PF00407;
4965	LOC_Os06g05000	75.141	4.26718	0.522966	2.84e-17	1.2e-15	early nodulin 93 ENOD93 protein, putative, expressed	Os06g0142300	OsENOD93			Q9SNR1	Q9SNR1_ORYSJ	unreviewed	Os06g0142300 protein	Os06g0142300 OSNPB_060142300	integral component of membrane [GO:0016021]		osa:4340084;	PF03386;
5761	LOC_Os07g18230	20.4939	4.24926	0.998007	1.85e-06	1.72e-05	lectin-like receptor kinase, putative, expressed	Os07g0283050				Q6YWI9	Q6YWI9_ORYSJ	unreviewed	Os07g0283050 protein	Os07g0283050 OSNPB_070283050	integral component of membrane [GO:0016021]; plasma membrane [GO:0005886]; ATP binding [GO:0005524]; carbohydrate binding [GO:0030246]; transmembrane receptor protein serine/threonine kinase activity [GO:0004675]; defense response [GO:0006952]; defense response to bacterium [GO:0042742]; defense response to oomycetes [GO:0002229]		osa:9268628;	PF00139;PF00069;
4037	LOC_Os04g54280	29.8667	4.24681	0.741883	9.3e-10	1.46e-08	retrotransposon protein, putative, Ty1-copia subclass, expressed	NA	NA			Q7XN62	Q7XN62_ORYSJ	unreviewed	OSJNBa0089N06.20 protein	OSJNBa0089N06.20	nucleic acid binding [GO:0003676]; zinc ion binding [GO:0008270]; DNA integration [GO:0015074]			PF13976;PF00665;PF07727;
172	LOC_Os01g09030	300.792	4.22995	0.344903	1.25e-35	2.67e-33	2-aminoethanethiol dioxygenase, putative, expressed	Os01g0185500				A0A0P0UZ10	A0A0P0UZ10_ORYSJ	unreviewed	Os01g0185500 protein	Os01g0185500 OSNPB_010185500	oxidoreductase activity, acting on single donors with incorporation of molecular oxygen, incorporation of two atoms of oxygen [GO:0016702]		osa:4325656;	PF07847;
1481	LOC_Os02g13460	11.968	4.2285	0.951475	2.28e-06	2.08e-05	receptor-like protein kinase 2 precursor, putative, expressed	Os02g0228000	OsRLCK70			B9F4E3	B9F4E3_ORYSJ	unreviewed	Protein kinase domain-containing protein	OsJ_05963	ATP binding [GO:0005524]; protein kinase activity [GO:0004672]			PF13855;PF00069;
2917	LOC_Os03g42600	2.75239	4.22677	2.74519	0.00192821	0.00854287	expressed protein	Os03g0624300				Q75LF9	Q75LF9_ORYSJ	unreviewed	Expressed protein (Os03g0624300 protein) (cDNA clone:001-101-G07, full insert sequence)	LOC_Os03g42600 Os03g0624300 OSNPB_030624300			osa:4333487;
4618	LOC_Os05g38219	30.3688	4.22631	0.595063	2.62e-13	6.64e-12	expressed protein	Os05g0456100				Q60EL8	Q60EL8_ORYSJ	unreviewed	Os05g0456100 protein	Os05g0456100 OSNPB_050456100
7298	LOC_Os10g22310	5.73792	4.2162	1.47463	0.000270233	0.0015299	glutathione S-transferase GST 26, putative, expressed	Os10g0368100				Q6QN17	Q6QN17_ORYSJ	unreviewed	Glutathione S-transferase GSTU35 (Glutathione transferase, putative, expressed) (Fragment)	LOC_Os10g22310	transferase activity [GO:0016740]			PF00043;PF02798;
7299	LOC_Os10g22310	5.73792	4.2162	1.47463	0.000270233	0.0015299	glutathione S-transferase GST 26, putative, expressed	Os10g0368100				Q109S9	Q109S9_ORYSJ	unreviewed	Glutathione transferase, putative, expressed (cDNA clone:001-107-G06, full insert sequence)	LOC_Os10g22310	transferase activity [GO:0016740]
7300	LOC_Os10g22310	5.73792	4.2162	1.47463	0.000270233	0.0015299	glutathione S-transferase GST 26, putative, expressed	Os10g0368100				A0A0P0XTY8	A0A0P0XTY8_ORYSJ	unreviewed	Os10g0368200 protein	Os10g0368200
8614	LOC_Os12g40330	43.5253	4.21588	0.556486	4.37e-15	1.42e-13	expressed protein	Os12g0594950				C7J9M9	C7J9M9_ORYSJ	unreviewed	Os12g0594800 protein	Os12g0594800			osa:9272261;
3876	LOC_Os04g47360	700.741	4.16831	0.184783	8.56e-114	2.97e-110	OsPOP9 - Putative Prolyl Oligopeptidase homologue, expressed	Os04g0561500	OsPOP9, POP9			A0A0P0WDF4	A0A0P0WDF4_ORYSJ	unreviewed	OSJNBa0084K11.14 protein (Os04g0561500 protein)	Os04g0561500 OsJ_15773 OSJNBa0084K11.14	cytoplasm [GO:0005737]; cytosol [GO:0005829]; endopeptidase activity [GO:0004175]; oligopeptidase activity [GO:0070012]; serine-type endopeptidase activity [GO:0004252]; serine-type exopeptidase activity [GO:0070008]		osa:4336657;	PF00326;PF02897;
3235	LOC_Os03g58880	76.5578	4.14618	0.533117	5.44e-16	1.99e-14	oxidoreductase, putative, expressed	Os03g0803300				Q84T01	Q84T01_ORYSJ	unreviewed	Prolyl 4-hydroxylase, putative, expressed	LOC_Os03g58880	iron ion binding [GO:0005506]; L-ascorbic acid binding [GO:0031418]; oxidoreductase activity, acting on paired donors, with incorporation or reduction of molecular oxygen [GO:0016705]		osa:107280232;	PF13640;
7720	LOC_Os11g02400	2.90893	4.14434	2.91564	0.00271764	0.0114579	LTPL8 - Protease inhibitor/seed storage/LTP family protein precursor, expressed	Os11g0116000	OsLTP1.12, OsLtpI.12			Q0IV35	Q0IV35_ORYSJ	unreviewed	Os11g0116000 protein	Os11g0116000 OsJ_32721	membrane [GO:0016020]; lipid binding [GO:0008289]; lipid transport [GO:0006869]		osa:4349605;	PF00234;
1480	LOC_Os02g13430	2.72081	4.1441	2.79168	0.00229361	0.00990358	receptor-like protein kinase 5 precursor, putative, expressed	Os02g0227700	OsRLK5			A0A0P0VGN8	A0A0P0VGN8_ORYSJ	unreviewed	Putative LRR receptor-like kinase	OsJ_05962 P0620H05.13	integral component of membrane [GO:0016021]; plasma membrane [GO:0005886]; ATP binding [GO:0005524]; protein kinase activity [GO:0004672]		osa:4328792;	PF13855;PF08263;PF07714;
5594	LOC_Os07g02660	8.54935	4.14001	1.14973	7.57e-05	0.0004911	expressed protein	Os07g0117800				Q0D8Z7	Q0D8Z7_ORYSJ	unreviewed	Os07g0117800 protein	Os07g0117800	ADP binding [GO:0043531]			PF00931;
3452	LOC_Os04g10924	2.70944	4.13653	2.79158	0.00231397	0.00998437	expressed protein	NA	NA			Q0JEX7	Q0JEX7_ORYSJ	unreviewed	Os04g0187800 protein	Os04g0187800	integral component of membrane [GO:0016021]
2872	LOC_Os03g37490	103.801	4.11109	0.343199	4.59e-34	9.08e-32	MATE efflux family protein, putative, expressed	Os03g0571900	PEZ1, OsPEZ1	OsPEZ1		B9F9D7	B9F9D7_ORYSJ	unreviewed	Uncharacterized protein	OsJ_11501	integral component of membrane [GO:0016021]; membrane [GO:0016020]; antiporter activity [GO:0015297]; transmembrane transporter activity [GO:0022857]; xenobiotic transmembrane transporter activity [GO:0042910]		osa:4333289;	PF01554;
4214	LOC_Os05g02730	2.68302	4.09952	2.78371	0.00235132	0.0101186	homeobox domain containing protein, expressed	Os05g0118700	gl1, NUDA/GL-1, NUDA/GL1, NUDA, GL-1, OsWOX3B, OsWOX2, OsWOX3, Os WOX3, WOX3B, WOX2, WOX3			Q5W7C3	WOX2_ORYSJ	reviewed	Putative WUSCHEL-related homeobox 2 (OsWOX2)	WOX2 Os05g0118700 LOC_Os05g02730 OsJ_016162 P0496H07.20	nucleus [GO:0005634]; DNA binding [GO:0003677]; multicellular organism development [GO:0007275]	SUBCELLULAR LOCATION: Nucleus {ECO:0000255|PROSITE-ProRule:PRU00108}.	osa:107275686;	PF00046;
6680	LOC_Os08g43620	5.50556	4.07001	1.49967	0.000388064	0.00210583	expressed protein	Os08g0549900				Q6ZJI5	Q6ZJI5_ORYSJ	unreviewed	Os08g0549900 protein	Os08g0549900 OJ1479_B11.18 OsJ_28196			osa:4346250;
3501	LOC_Os04g22120	5.41712	4.06802	1.48172	0.000363089	0.00198804	protein kinase, putative, expressed	Os04g0288500				Q7X756	Q7X756_ORYSJ	unreviewed	Os04g0288500 protein	Os04g0288500 OSNPB_040288500	integral component of membrane [GO:0016021]; plasma membrane [GO:0005886]; ATP binding [GO:0005524]; carbohydrate binding [GO:0030246]; transmembrane receptor protein serine/threonine kinase activity [GO:0004675]; defense response [GO:0006952]; defense response to bacterium [GO:0042742]; defense response to oomycetes [GO:0002229]		osa:4335391;	PF00139;PF00069;
5776	LOC_Os07g23410	542.106	4.04043	0.292731	1.8e-44	6.96e-42	fatty acid desaturase, putative, expressed	Os07g0416900	OsFAD2-3, FAD2-3, OsaFAD2-2, FAD2-2			Q0D6Z3	Q0D6Z3_ORYSJ	unreviewed	Os07g0416900 protein (Putative delta 12 oleic acid desaturase)	Os07g0416900 OSJNBa0066B06.115	integral component of membrane [GO:0016021]; oxidoreductase activity, acting on paired donors, with oxidation of a pair of donors resulting in the reduction of molecular oxygen to two molecules of water [GO:0016717]; lipid metabolic process [GO:0006629]		osa:4343026;	PF11960;PF00487;
5589	LOC_Os07g02570	32.4888	4.03573	0.546832	2.91e-14	8.42e-13	NB-ARC domain containing protein, expressed	Os07g0116900				A3BG10	A3BG10_ORYSJ	unreviewed	NB-ARC domain-containing protein	OsJ_22885	ADP binding [GO:0043531]		osa:107278772;	PF00931;
5288	LOC_Os06g37300	110.273	4.03252	0.401682	9.35e-25	8.46e-23	cytochrome P450, putative, expressed	Os06g0569500	OsKO4, OsKOL4, KOS1, CYP701A8, OsKO2			Q0DBF4	C7018_ORYSJ	reviewed	Ent-sandaracopimaradiene 3-hydroxylase (EC 1.14.14.70) (Cytochrome P450 701A8) (Ent-kaurene oxidase 4) (OsKO4) (Ent-kaurene oxidase-like 4) (OsKOL4) (OsKOS1) (Syn-pimaradiene 3-monooxygenase) (EC 1.14.14.68)	CYP701A8 KO1 Os06g0569500 LOC_Os06g37300 OSJNBa0062E01.27	chloroplast outer membrane [GO:0009707]; endoplasmic reticulum [GO:0005783]; integral component of membrane [GO:0016021]; intracellular membrane-bounded organelle [GO:0043231]; cytochrome P450 dependent ent-sandaracopimaradiene 3-hydroxylase activity [GO:0102596]; heme binding [GO:0020037]; iron ion binding [GO:0005506]; oxidoreductase activity, acting on paired donors, with incorporation or redu…	SUBCELLULAR LOCATION: Membrane {ECO:0000255}; Single-pass membrane protein {ECO:0000255}.	osa:4341343;	PF00067;
1460	LOC_Os02g12380	62.7889	4.03194	0.436036	2.99e-21	1.89e-19	histone deacetylase, putative, expressed	Os02g0215200	OsHDAC2, HDA710, OsHDA710			Q6YV04	HDAC2_ORYSJ	reviewed	Histone deacetylase 2 (OsHDAC2) (EC 3.5.1.98)	HDAC2 HDA710 Os02g0215200 LOC_Os02g12380 B1307A11.3-1 OJ1006_D05.31-1 OsJ_05884	histone deacetylase complex [GO:0000118]; Sin3-type complex [GO:0070822]; histone deacetylase activity [GO:0004407]; NAD-dependent histone deacetylase activity (H3-K14 specific) [GO:0032041]; histone H3 deacetylation [GO:0070932]; histone H4 deacetylation [GO:0070933]; positive regulation of transcription by RNA polymerase II [GO:0045944]	SUBCELLULAR LOCATION: Nucleus {ECO:0000250|UniProtKB:O22446}.	osa:4328720;	PF00850;
5622	LOC_Os07g04270	2.63752	4.00538	2.8346	0.00278964	0.0117107	hypothetical protein	NA	NA			Q6ZDY2	Q6ZDY2_ORYSJ	unreviewed	Uncharacterized protein	OsJ_23004 P0495H05.3 P0507H12.34	integral component of membrane [GO:0016021]
3385	LOC_Os04g01470	29.1321	3.98426	0.646379	9.94e-11	1.8e-09	O-methyltransferase, putative, expressed	Os04g0104900	OsCOMTL2			Q7XXI9	OMTL2_ORYSJ	reviewed	Caffeate O-methyltransferase-like protein 2 (OsCOMTL2) (EC 2.1.1.-)	COMTL2 Os04g0104900 LOC_Os04g01470 OSJNBa0094O15.13	O-methyltransferase activity [GO:0008171]; protein dimerization activity [GO:0046983]; S-adenosylmethionine-dependent methyltransferase activity [GO:0008757]; aromatic compound biosynthetic process [GO:0019438]; methylation [GO:0032259]			PF08100;PF00891;
2939	LOC_Os03g44140	18.4744	3.98205	0.752606	2.07e-08	2.62e-07	OsWAK26 - OsWAK receptor-like protein kinase, expressed	Os03g0643250				Q60DP4	Q60DP4_ORYSJ	unreviewed	Calcium binding EGF domain containing protein, expressed	LOC_Os03g44140	integral component of membrane [GO:0016021]; ATP binding [GO:0005524]; calcium ion binding [GO:0005509]; polysaccharide binding [GO:0030247]; protein kinase activity [GO:0004672]			PF00008;PF13947;PF12706;PF00069;
7290	LOC_Os10g21790	10.5068	3.97845	0.975702	9.16e-06	7.43e-05	dehydration stress-induced protein, putative, expressed	Os10g0361900				A0A0P0XT82	A0A0P0XT82_ORYSJ	unreviewed	Os10g0361900 protein	Os10g0361900 OSNPB_100361900			osa:4348446;	PF01477;
5662	LOC_Os07g07300	70.6386	3.97592	0.381351	2.72e-26	2.76e-24	expressed protein	Os07g0167500				A0A0P0X2K6	A0A0P0X2K6_ORYSJ	unreviewed	Os07g0167500 protein	OJ1641_C04.129 Os07g0167500	integral component of membrane [GO:0016021]		osa:4342493;
5282	LOC_Os06g37010	97.9273	3.97571	0.369742	5.63e-28	6.52e-26	metal cation transporter, putative, expressed	Os06g0566300	OsZIP10, ZIP10			Q5Z653	ZIP10_ORYSJ	reviewed	Zinc transporter 10 (ZRT/IRT-like protein 10) (OsZIP10)	ZIP10 Os06g0566300 LOC_Os06g37010 P0513E02.27 P0567G03.8	integral component of membrane [GO:0016021]; membrane [GO:0016020]; plasma membrane [GO:0005886]; zinc ion transmembrane transporter activity [GO:0005385]; zinc ion transmembrane transport [GO:0071577]	SUBCELLULAR LOCATION: Cell membrane {ECO:0000305}; Multi-pass membrane protein {ECO:0000305}.		PF02535;
6254	LOC_Os08g05770	10.7528	3.96577	1.0129	1.43e-05	0.000110836	expressed protein	NA	NA			Q0J7Z1	Q0J7Z1_ORYSJ	unreviewed	Os08g0153800 protein	Os08g0153800	integral component of membrane [GO:0016021]			PF04654;
3541	LOC_Os04g30250	7.85833	3.95554	1.16517	0.000137354	0.000837237	wall-associated receptor kinase-like 5 precursor, putative, expressed	Os04g0371000				B9FEQ5	B9FEQ5_ORYSJ	unreviewed	Os04g0371000 protein	Os04g0371000 OSNPB_040371000	polysaccharide binding [GO:0030247]		osa:4335594;	PF13947;
7012	LOC_Os09g30490	670.59	3.94174	0.303952	1.14e-39	3.3e-37	EF hand family protein, expressed	Os09g0482800				A3C020	A3C020_ORYSJ	unreviewed	Os09g0482800 protein (cDNA clone:001-123-B12, full insert sequence) (cDNA clone:J033097N16, full insert sequence)	Os09g0482800 OSNPB_090482800	calcium ion binding [GO:0005509]		osa:9271885;	PF13499;
3402	LOC_Os04g03210	36.7865	3.91801	0.663906	3.42e-10	5.74e-09	receptor kinase, putative, expressed	Os04g0122200				Q6MWD0	Q6MWD0_ORYSJ	unreviewed	B1292H11.1 protein	B1292H11.1	integral component of membrane [GO:0016021]; ATP binding [GO:0005524]; protein serine/threonine kinase activity [GO:0004674]			PF13855;PF08263;PF00069;
5223	LOC_Os06g29730	1096.07	3.91388	0.812327	7.98e-08	9.3e-07	RALFL28 - Rapid ALkalinization Factor RALF family protein precursor, expressed	Os06g0493100	bphi008a, BpHi008A, OsRALF-22, OsRALF22, RALF-22, RALF22			Q656L1	Q656L1_ORYSJ	unreviewed	Os06g0493100 protein (cDNA clone:001-121-F04, full insert sequence)	Os06g0493100 OSNPB_060493100	integral component of membrane [GO:0016021]
6681	LOC_Os08g43630	2.60468	3.91067	2.89506	0.00327529	0.0133958	expressed protein	Os08g0550000				Q6ZJI4	Q6ZJI4_ORYSJ	unreviewed	Os08g0550000 protein	Os08g0550000 OJ1479_B11.19			osa:4346251;
3010	LOC_Os03g49524	7.61773	3.90659	1.17594	0.000177731	0.00105224	anthocyanidin 3-O-glucosyltransferase, putative, expressed	Os03g0702000				Q75I83	Q75I83_ORYSJ	unreviewed	UDP-glucoronosyl and UDP-glucosyl transferase family protein, expressed	LOC_Os03g49524	transferase activity, transferring hexosyl groups [GO:0016758]			PF00201;
7014	LOC_Os09g31000	10.9224	3.90493	1.11574	5.34e-05	0.000363762	EF hand family protein, expressed	Os09g0483100				Q0J0U5	Q0J0U5_ORYSJ	unreviewed	Os09g0483100 protein	Os09g0483100 OSNPB_090483100	calcium ion binding [GO:0005509]		osa:4347408;	PF13499;
5286	LOC_Os06g37224	290.098	3.88053	0.311504	1.08e-36	2.56e-34	cytochrome P450, putative, expressed	Os06g0568600	OsKO5, OSKOL5, KOS2, CYP701A9, OsKO1			Q5Z5S6	C7019_ORYSJ	reviewed	Ent-kaurene oxidase-like 5 (OsKOL5) (EC 1.14.13.-) (Cytochrome P450 701A9) (Ent-kaurene oxidase 5) (OsKO5) (OsKOS2)	CYP701A9 Os06g0568600 LOC_Os06g37224 OSJNBa0062E01.13	chloroplast outer membrane [GO:0009707]; endoplasmic reticulum [GO:0005783]; integral component of membrane [GO:0016021]; intracellular membrane-bounded organelle [GO:0043231]; heme binding [GO:0020037]; iron ion binding [GO:0005506]; monooxygenase activity [GO:0004497]; oxidoreductase activity, acting on paired donors, with incorporation or reduction of molecular oxygen [GO:0016705]; ent-kaurene…	SUBCELLULAR LOCATION: Membrane {ECO:0000255}; Single-pass membrane protein {ECO:0000255}.	osa:4341340;	PF00067;
5609	LOC_Os07g03610	4.9884	3.86693	1.55045	0.000750961	0.00374511	SCP-like extracellular protein, expressed	NA	NA			Q6YSG9	Q6YSG9_ORYSJ	unreviewed	Os07g0127800 protein	Os07g0127800 OSNPB_070127800	extracellular space [GO:0005615]		osa:107275384;	PF00188;
4202	LOC_Os05g02240	12.5516	3.86633	0.892254	2.29e-06	2.09e-05	ATCHX20, putative, expressed	Os05g0113300	OsCHX12			A0A0P0WH43	A0A0P0WH43_ORYSJ	unreviewed	Os05g0113300 protein	Os05g0113300	endomembrane system [GO:0012505]; integral component of membrane [GO:0016021]; solute:proton antiporter activity [GO:0015299]; monovalent inorganic cation transport [GO:0015672]; regulation of pH [GO:0006885]		osa:4337604;	PF00999;
5777	LOC_Os07g23430	293.685	3.85	0.366737	6.18e-27	6.56e-25	fatty acid desaturase, putative, expressed	Os07g0417200	OsFAD2-2, FAD2-2, OsaFAD2-3, FAD2-3			Q0D6Z2	Q0D6Z2_ORYSJ	unreviewed	Os07g0417200 protein (Fragment)	Os07g0417200 OSNPB_070417200	integral component of membrane [GO:0016021]; oxidoreductase activity, acting on paired donors, with oxidation of a pair of donors resulting in the reduction of molecular oxygen to two molecules of water [GO:0016717]; lipid metabolic process [GO:0006629]			PF11960;PF00487;
2506	LOC_Os03g13140	4157.44	3.84897	0.238335	7.93e-60	7.14e-57	non-symbiotic hemoglobin 2, putative, expressed	Os03g0233900	HB1, OsHB1, GLB1A, rHb1, ORYsa GLB1a, nsHb1, OsNSHB1, hb1, nsHb, OsPgb1.1, Pgb1.1			Q10PH4	Q10PH4_ORYSJ	unreviewed	Non-symbiotic hemoglobin 1, putative, expressed	LOC_Os03g13140	heme binding [GO:0020037]; metal ion binding [GO:0046872]; oxygen binding [GO:0019825]; oxygen carrier activity [GO:0005344]			PF00042;
2507	LOC_Os03g13140	4157.44	3.84897	0.238335	7.93e-60	7.14e-57	non-symbiotic hemoglobin 2, putative, expressed	Os03g0233900	HB1, OsHB1, GLB1A, rHb1, ORYsa GLB1a, nsHb1, OsNSHB1, hb1, nsHb, OsPgb1.1, Pgb1.1			O04986	HBL1_ORYSJ	reviewed	Non-symbiotic hemoglobin 1 (ORYsa GLB1a) (rHb1)	HB1 GLB1A Os03g0233900 LOC_Os03g13140 OJ1175C11.5 OsJ_10047	heme binding [GO:0020037]; metal ion binding [GO:0046872]; oxygen binding [GO:0019825]		osa:4332166;	PF00042;
3438	LOC_Os04g09900	1272.43	3.84585	0.531923	3.18e-14	9.11e-13	ent-kaurene synthase, chloroplast precursor, putative, expressed	Os04g0178300	OsCPS4, CYC1, OsCYC1, OsCyc1, cpsl3, OsCPSL3, OsCPSsyn, OsCyc1/OsCPS4, OsTPS15, Os-CPS4			A3ARJ4	A3ARJ4_ORYSJ	unreviewed	Terpene_synth domain-containing protein	OsJ_13987	terpene synthase activity [GO:0010333]			PF01397;
3439	LOC_Os04g09900	1272.43	3.84585	0.531923	3.18e-14	9.11e-13	ent-kaurene synthase, chloroplast precursor, putative, expressed	Os04g0178300	OsCPS4, CYC1, OsCYC1, OsCyc1, cpsl3, OsCPSL3, OsCPSsyn, OsCyc1/OsCPS4, OsTPS15, Os-CPS4			Q0JF02	CPS4_ORYSJ	reviewed	Syn-copalyl diphosphate synthase (OsCPSsyn) (Syn-CPP synthase) (EC 5.5.1.14) (OsCPS4) (OsCyc1)	CPS4 CYC1 Os04g0178300 LOC_Os04g09900 OSJNBa0096F01.12	chloroplast [GO:0009507]; magnesium ion binding [GO:0000287]; syn-copalyl diphosphate synthase activity [GO:0051498]; terpene synthase activity [GO:0010333]; defense response [GO:0006952]; diterpenoid biosynthetic process [GO:0016102]; gibberellin biosynthetic process [GO:0009686]		osa:4335090;	PF01397;
745	LOC_Os01g52320	45.8761	3.84554	0.447408	1.2e-18	5.91e-17	NB-ARC domain containing protein, expressed	Os01g0721200				A0A0P0V7L9	A0A0P0V7L9_ORYSJ	unreviewed	Os01g0721200 protein	Os01g0721200 OSNPB_010721200	ADP binding [GO:0043531]		osa:107275946;	PF00931;PF18052;
7017	LOC_Os09g31040	71.7711	3.83972	0.526162	2.5e-14	7.29e-13	EF hand family protein, putative, expressed	Os09g0483500				A0A0N7KR06	A0A0N7KR06_ORYSJ	unreviewed	Os09g0483500 protein	Os09g0483500 OsJ_29807	calcium ion binding [GO:0005509]		osa:4347412;	PF13499;
2731	LOC_Os03g22170	152.658	3.83239	0.330589	3.53e-32	6.4e-30	AP2 domain containing protein, expressed	Os03g0341000	OsERF#066, OsERF066, OsERF66, AP2/EREBP#030, AP2/EREBP30			Q0DS06	Q0DS06_ORYSJ	unreviewed	Os03g0341000 protein	Os03g0341000	nucleus [GO:0005634]; DNA binding [GO:0003677]; DNA-binding transcription factor activity [GO:0003700]		osa:4332792;	PF00847;
6897	LOC_Os09g24620	62.1003	3.83076	0.40082	1.68e-22	1.22e-20	expressed protein	Os09g0412700				Q6ESJ4	Q6ESJ4_ORYSJ	unreviewed	Os09g0412700 protein	Os09g0412700 OJ1294_G06.34 P0643D11.9	integral component of membrane [GO:0016021]		osa:4347042;
2683	LOC_Os03g20260	31.1638	3.82416	0.537088	1.57e-13	4.08e-12	aspartic proteinase nepenthesin-1 precursor, putative, expressed	Os03g0317900				A0A0N7KH60	A0A0N7KH60_ORYSJ	unreviewed	Os03g0317900 protein	Os03g0317900 OSNPB_030317900	extracellular region [GO:0005576]; aspartic-type endopeptidase activity [GO:0004190]; protein catabolic process [GO:0030163]; proteolysis [GO:0006508]		osa:107275570;	PF14541;PF14543;
8651	LOC_Os12g42010	7.47186	3.80961	1.22789	0.000294181	0.00164632	lipase class 3 family protein, putative, expressed	Os12g0614500				A0A0P0YC44	A0A0P0YC44_ORYSJ	unreviewed	Os12g0614500 protein	Os12g0614500 OSNPB_120614500	phospholipase activity [GO:0004620]; lipid metabolic process [GO:0006629]			PF01764;
8395	LOC_Os12g14480	2.42666	3.80307	2.84695	0.00342929	0.0139389	cysteine-rich receptor-like protein kinase 23 precursor, putative, expressed	NA	NA			Q2QV04	Q2QV04_ORYSJ	unreviewed	Protein kinase domain containing protein	LOC_Os12g14480	ATP binding [GO:0005524]; protein kinase activity [GO:0004672]			PF00069;
5253	LOC_Os06g34530	23.9068	3.79708	0.646274	5.46e-10	8.89e-09	zinc finger, C3HC4 type domain containing protein, expressed	Os06g0536100				Q5Z5E5	Q5Z5E5_ORYSJ	unreviewed	Os06g0536100 protein	Os06g0536100 OSNPB_060536100	integral component of membrane [GO:0016021]		osa:107277142;	PF13639;
7223	LOC_Os10g08540	261.506	3.78702	0.225921	4.71e-64	5.73e-61	cytochrome P450, putative, expressed	Os10g0167250				Q33AR5	Q33AR5_ORYSJ	unreviewed	Cytochrome P450 family protein, expressed	LOC_Os10g08540	heme binding [GO:0020037]; iron ion binding [GO:0005506]; oxidoreductase activity, acting on paired donors, with incorporation or reduction of molecular oxygen [GO:0016705]			PF00067;
7224	LOC_Os10g08540	261.506	3.78702	0.225921	4.71e-64	5.73e-61	cytochrome P450, putative, expressed	Os10g0167200				Q33AR5	Q33AR5_ORYSJ	unreviewed	Cytochrome P450 family protein, expressed	LOC_Os10g08540	heme binding [GO:0020037]; iron ion binding [GO:0005506]; oxidoreductase activity, acting on paired donors, with incorporation or reduction of molecular oxygen [GO:0016705]			PF00067;
8372	LOC_Os12g11990	10.5224	3.78231	1.21351	0.000171551	0.00101888	expressed protein	NA	NA			A3AL90	A3AL90_ORYSJ	unreviewed	Uncharacterized protein	OsJ_12043
5822	LOC_Os07g29960	4.97681	3.77897	1.64571	0.00117911	0.00555252	cytochrome P450, putative, expressed	Os07g0482900				A3BJS7	A3BJS7_ORYSJ	unreviewed	Uncharacterized protein	OsJ_24256	heme binding [GO:0020037]; iron ion binding [GO:0005506]; monooxygenase activity [GO:0004497]; oxidoreductase activity, acting on paired donors, with incorporation or reduction of molecular oxygen [GO:0016705]			PF00067;
3839	LOC_Os04g45890	20.9809	3.77623	0.683127	4.72e-09	6.61e-08	retrotransposon protein, putative, unclassified, expressed	NA	NA			Q7XUJ0	Q7XUJ0_ORYSJ	unreviewed	OSJNBb0103I08.13 protein	OSJNBb0103I08.13	nucleic acid binding [GO:0003676]; zinc ion binding [GO:0008270]			PF00098;
6854	LOC_Os09g19820	134.696	3.7743	0.347102	1.41e-28	1.72e-26	aminopeptidase, putative, expressed	Os09g0362800				B9FG75	B9FG75_ORYSJ	unreviewed	Uncharacterized protein	OsJ_15502				PF11838;
6855	LOC_Os09g19820	134.696	3.7743	0.347102	1.41e-28	1.72e-26	aminopeptidase, putative, expressed	Os09g0362800				Q6K4E7	APM1D_ORYSJ	reviewed	Aminopeptidase M1-D (EC 3.4.11.2) (Alpha-aminoacylpeptide hydrolase)	Os09g0362800 LOC_Os09g19800/LOC_Os09g19820 OJ1506_A04.11	cytoplasm [GO:0005737]; endoplasmic reticulum [GO:0005783]; organelle membrane [GO:0031090]; metalloaminopeptidase activity [GO:0070006]; peptide binding [GO:0042277]; zinc ion binding [GO:0008270]; peptide catabolic process [GO:0043171]; proteolysis [GO:0006508]	SUBCELLULAR LOCATION: Membrane {ECO:0000250}; Peripheral membrane protein {ECO:0000250}. Microsome membrane {ECO:0000250}; Peripheral membrane protein {ECO:0000250}. Cytoplasm {ECO:0000250}. Note=The dileucine internalization motif may be involved in intracellular sequestration.	osa:4346856;	PF11838;PF01433;
4756	LOC_Os05g45090	5.06526	3.77405	1.67357	0.00127034	0.00593272	anthocyanidin 5,3-O-glucosyltransferase, putative, expressed	Os05g0526900	OsUGT706D2			Q0DGK3	Q0DGK3_ORYSJ	unreviewed	Glycosyltransferase (EC 2.4.1.-)	Os05g0526900 OSNPB_050526900	intracellular membrane-bounded organelle [GO:0043231]; transferase activity, transferring hexosyl groups [GO:0016758]; UDP-glycosyltransferase activity [GO:0008194]		osa:4339387;	PF00201;
7836	LOC_Os11g07840	9.37984	3.77379	1.00694	3.13e-05	0.000225282	expressed protein	Os11g0180100	OsDUF668-11			Q53NQ8	Q53NQ8_ORYSJ	unreviewed	Expressed protein	LOC_Os11g07840				PF11961;PF05003;
540	LOC_Os01g41770	41.8833	3.77192	0.510217	1.72e-14	5.16e-13	leucine rich repeat protein, putative, expressed	Os01g0601675				Q8S1D2	Q8S1D2_ORYSJ	unreviewed	Os01g0601675 protein	Os01g0601675 OSNPB_010601675	integral component of membrane [GO:0016021]		osa:9268844;	PF00560;PF13855;PF08263;
3507	LOC_Os04g23910	36.9172	3.77088	0.500358	7.04e-15	2.2e-13	OsMADS25 - MADS-box family gene with MIKCc type-box, expressed	Os04g0304400	OsMADS25			Q84NC5	MAD25_ORYSJ	reviewed	MADS-box transcription factor 25 (OsMADS25)	MADS25 Os04g0304400 LOC_Os04g23910 OSJNBa0079M09.14	nucleus [GO:0005634]; DNA-binding transcription factor activity [GO:0003700]; protein dimerization activity [GO:0046983]; RNA polymerase II regulatory region sequence-specific DNA binding [GO:0000977]; positive regulation of transcription by RNA polymerase II [GO:0045944]	SUBCELLULAR LOCATION: Nucleus {ECO:0000305}.	osa:4335427;	PF01486;PF00319;
7025	LOC_Os09g31442	13.7009	3.75954	0.82071	7.93e-07	7.82e-06	expressed protein	NA	NA			B9FKQ3	B9FKQ3_ORYSJ	unreviewed	Uncharacterized protein	OsJ_18890	integral component of membrane [GO:0016021]; metal ion transmembrane transporter activity [GO:0046873]			PF02535;
270	LOC_Os01g13610	120.289	3.74715	0.407202	2.87e-21	1.82e-19	isoflavone reductase homolog IRL, putative, expressed	Os01g0237500				A2ZR42	A2ZR42_ORYSJ	unreviewed	Uncharacterized protein	OsJ_01038				PF05368;
271	LOC_Os01g13610	120.289	3.74715	0.407202	2.87e-21	1.82e-19	isoflavone reductase homolog IRL, putative, expressed	Os01g0237750				A2ZR42	A2ZR42_ORYSJ	unreviewed	Uncharacterized protein	OsJ_01038				PF05368;
8253	LOC_Os12g03899	291.253	3.74293	0.23691	2.74e-57	2.02e-54	major facilitator superfamily antiporter, putative, expressed	Os12g0133100	OsZIFL12, OsVMT, VMT, OsVMT/OsZIFL12	OsVMT		B7ER16	B7ER16_ORYSJ	unreviewed	Transporter, putative, expressed (cDNA clone:J023128K07, full insert sequence)	LOC_Os12g03899	integral component of membrane [GO:0016021]; transmembrane transport [GO:0055085]			PF07690;
8254	LOC_Os12g03899	291.253	3.74293	0.23691	2.74e-57	2.02e-54	major facilitator superfamily antiporter, putative, expressed	Os12g0133100	OsZIFL12, OsVMT, VMT, OsVMT/OsZIFL12			H2KWZ1	H2KWZ1_ORYSJ	unreviewed	Uncharacterized protein	OsJ_35137	integral component of membrane [GO:0016021]; transmembrane transport [GO:0055085]			PF07690;
8255	LOC_Os12g03899	291.253	3.74293	0.23691	2.74e-57	2.02e-54	major facilitator superfamily antiporter, putative, expressed	Os12g0133100	OsZIFL12, OsVMT, VMT, OsVMT/OsZIFL12			H2KWZ0	H2KWZ0_ORYSJ	unreviewed	Os12g0133100 protein (Transporter, putative, expressed) (Vacuolar mugineic acid transporter)	OsVMT LOC_Os12g03899 Os12g0133100 OSNPB_120133100	integral component of membrane [GO:0016021]; transmembrane transport [GO:0055085]		osa:4351427;	PF07690;
3799	LOC_Os04g44250	49.0772	3.73085	0.428895	5.22e-19	2.68e-17	cytokinin-O-glucosyltransferase 3, putative, expressed	NA	NA			Q7XKF9	Q7XKF9_ORYSJ	unreviewed	Glycosyltransferase (EC 2.4.1.-)	OSJNBb0065J09.10	transferase activity, transferring hexosyl groups [GO:0016758]			PF00201;
378	LOC_Os01g22352	17.8052	3.71838	0.699582	1.76e-08	2.26e-07	peroxidase precursor, putative, expressed	Os01g0327100	prx15			Q0JN57	Q0JN57_ORYSJ	unreviewed	Os01g0327100 protein	Os01g0327100	extracellular region [GO:0005576]; plant-type cell wall [GO:0009505]; plasmodesma [GO:0009506]; heme binding [GO:0020037]; metal ion binding [GO:0046872]; peroxidase activity [GO:0004601]; hydrogen peroxide catabolic process [GO:0042744]; response to oxidative stress [GO:0006979]		osa:4326969;	PF00141;
890	LOC_Os01g58860	35.8304	3.70217	0.523666	1.83e-13	4.71e-12	auxin efflux carrier component, putative, expressed	Os01g0802700	OsPIN9			Q5VQY3	PIN9_ORYSJ	reviewed	Probable auxin efflux carrier component 9 (OsPIN9)	PIN9 Os01g0802700 LOC_Os01g58860 P0003D09.37	integral component of membrane [GO:0016021]; auxin-activated signaling pathway [GO:0009734]; transmembrane transport [GO:0055085]	SUBCELLULAR LOCATION: Membrane {ECO:0000255}; Multi-pass membrane protein {ECO:0000255}.	osa:4327533;	PF03547;
3404	LOC_Os04g03710	6.8996	3.7	1.25268	0.000489635	0.00258437	OsSub36 - Putative Subtilisin homologue, expressed	NA	NA			Q6MW93	Q6MW93_ORYSJ	unreviewed	B1248C03.11 protein	B1248C03.11	serine-type endopeptidase activity [GO:0004252]			PF00082;
6657	LOC_Os08g42590	1126.64	3.69785	0.166068	4.75e-111	1.28e-107	mtN19, putative, expressed	Os08g0538600				B9EYH3	B9EYH3_ORYSJ	unreviewed	Os08g0538600 protein (Putative MtN19)	P0666G10.103 Os08g0538600 OsJ_02924 P0665C04.36			osa:4346175;	PF07712;
7377	LOC_Os10g30010	6.64058	3.69105	1.18593	0.000360517	0.00197575	retrotransposon protein, putative, unclassified, expressed	NA	NA			C7J7D8	C7J7D8_ORYSJ	unreviewed	Os10g0436500 protein	Os10g0436500
5587	LOC_Os07g02540	4.48164	3.68824	1.55349	0.00108168	0.00515054	HLS, putative, expressed	Os07g0116600				Q7EYF5	Q7EYF5_ORYSJ	unreviewed	Os07g0116600 protein	Os07g0116600 OSNPB_070116600	N-acetyltransferase activity [GO:0008080]; transferase activity, transferring acyl groups other than amino-acyl groups [GO:0016747]		osa:107276557;	PF00583;
7362	LOC_Os10g28299	4.48164	3.68824	1.55349	0.00108168	0.00515054	expressed protein	Os10g0418900				A0A0P0XU80	A0A0P0XU80_ORYSJ	unreviewed	Uncharacterized protein	OsJ_31539
8011	LOC_Os11g31540	809.637	3.68707	0.321171	1.23e-31	2.1e-29	BRASSINOSTEROID INSENSITIVE 1-associated receptor kinase 1 precursor, putative, expressed	Os11g0514500				Q2R3L3	Q2R3L3_ORYSJ	unreviewed	BRASSINOSTEROID INSENSITIVE 1-associated receptor kinase 1, putative, expressed (Os11g0514500 protein) (cDNA, clone: J100084L14, full insert sequence)	LOC_Os11g31540 Os11g0514500 OSNPB_110514500	kinase activity [GO:0016301]		osa:4350584;	PF08263;
2913	LOC_Os03g42090	2.51256	3.687	3.01421	0.00432263	0.0170046	expressed protein	NA	NA			Q6AV36	Q6AV36_ORYSJ	unreviewed	Uncharacterized protein	LOC_Os03g42090
1804	LOC_Os02g40500	805.551	3.68381	0.234143	5.63e-57	3.91e-54	OsGrx_C2.1 - glutaredoxin subgroup I, expressed	Os02g0618100	OsGRX9, OsGrx_C2.1, Grx_C2.1			Q6K953	GRXC4_ORYSJ	reviewed	Glutaredoxin-C4, chloroplastic (Glutaredoxin-C2 homolog 2)	GRXC4 Os02g0618100 LOC_Os02g40500 OJ1014_H03.21 OJ1212_C01.7	cell [GO:0005623]; chloroplast [GO:0009507]; cytoplasm [GO:0005737]; electron transfer activity [GO:0009055]; glutathione-disulfide reductase activity [GO:0004362]; protein disulfide oxidoreductase activity [GO:0015035]; cell redox homeostasis [GO:0045454]; cellular response to oxidative stress [GO:0034599]	SUBCELLULAR LOCATION: Plastid, chloroplast {ECO:0000305}.	osa:4329999;	PF00462;
2384	LOC_Os03g08460	532.027	3.67556	0.227275	5.83e-60	5.45e-57	AP2 domain containing protein, expressed	Os03g0182800	OsEBP-89, ebp-89, OsERF#060, OsERF060, OsERF60, ERF60, AP2/EREBP#027, AP2/EREBP27, OsEBP89, DLN76, OsDLN76			Q0DUJ8	Q0DUJ8_ORYSJ	unreviewed	Os03g0182800 protein	Os03g0182800	nucleus [GO:0005634]; DNA binding [GO:0003677]; DNA-binding transcription factor activity [GO:0003700]		osa:4331843;	PF00847;
4575	LOC_Os05g35930	17.3622	3.67292	0.692578	1.88e-08	2.39e-07	expressed protein	Os05g0434800				B9FIZ8	B9FIZ8_ORYSJ	unreviewed	Uncharacterized protein	OsJ_18659	integral component of membrane [GO:0016021]		osa:9269376;	PF06749;
4432	LOC_Os05g25430	230.158	3.66078	0.257951	8.57e-47	3.79e-44	receptor-like protein kinase At3g46290 precursor, putative, expressed	Os05g0318600				Q5W6V7	Q5W6V7_ORYSJ	unreviewed	Os05g0318600 protein	Os05g0318600 OSNPB_050318600	integral component of membrane [GO:0016021]; ATP binding [GO:0005524]; protein kinase activity [GO:0004672]		osa:9268893;	PF12819;PF07714;
999	LOC_Os01g64000	9.21835	3.65763	1.09662	0.000106602	0.000667004	bZIP transcription factor, putative, expressed	Os01g0859300	OsABI5, OsbZIP10, OsABF1, OREB1, OsABI5-1, OsABI5-2, OsOREB1, OREB1			Q8RZ35	ABI5_ORYSJ	reviewed	bZIP transcription factor ABI5 homolog (OsABI5) (bZIP transcription factor 10) (OsBZIP10)	ABI5 BZIP10 OREB1 Os01g0859300 LOC_Os01g64000 OsJ_04142 P0489B03.11 P0679C12.1	nucleus [GO:0005634]; DNA-binding transcription factor activity [GO:0003700]; protein homodimerization activity [GO:0042803]; sequence-specific DNA binding [GO:0043565]; abscisic acid-activated signaling pathway [GO:0009738]; pollen maturation [GO:0010152]; regulation of transcription, DNA-templated [GO:0006355]; response to abscisic acid [GO:0009737]; response to cold [GO:0009409]; response to s…	SUBCELLULAR LOCATION: Nucleus {ECO:0000255|PROSITE-ProRule:PRU00978, ECO:0000269|PubMed:18236009, ECO:0000269|PubMed:21055780, ECO:0000269|PubMed:22071266, ECO:0000269|PubMed:28000033}.	osa:4325061;	PF00170;
8020	LOC_Os11g32170	19.7582	3.65475	0.722166	5.17e-08	6.18e-07	stripe rust resistance protein Yr10, putative, expressed	Os11g0524601				Q2R3E9	Q2R3E9_ORYSJ	unreviewed	NB-ARC domain containing protein, expressed	LOC_Os11g32170	ADP binding [GO:0043531]; carbohydrate binding [GO:0030246]			PF01419;PF00931;PF18052;
8076	LOC_Os11g37200	2.40391	3.65109	2.96878	0.00433756	0.0170551	transmembrane BAX inhibitor motif-containing protein, putative, expressed	Os11g0581900				Q2R230	Q2R230_ORYSJ	unreviewed	Os11g0581900 protein (cDNA clone:J023020E21, full insert sequence)	LOC_Os11g37200 Os11g0581900 OSNPB_110581900	integral component of membrane [GO:0016021]		osa:4350786;	PF01027;
1459	LOC_Os02g12350	77.0864	3.65018	0.387583	5e-22	3.41e-20	histone deacetylase, putative, expressed	Os02g0214900	OsHDAC3, HDA703			Q7Y0Y6	HDAC3_ORYSJ	reviewed	Histone deacetylase 3 (OsHDAC3) (EC 3.5.1.98)	HDAC3 HDA703 Os02g0214900 LOC_Os02g12350 OJ1006_D05.27-1	histone deacetylase complex [GO:0000118]; Sin3-type complex [GO:0070822]; histone deacetylase activity [GO:0004407]; NAD-dependent histone deacetylase activity (H3-K14 specific) [GO:0032041]; histone H3 deacetylation [GO:0070932]; histone H4 deacetylation [GO:0070933]; positive regulation of transcription by RNA polymerase II [GO:0045944]	SUBCELLULAR LOCATION: Nucleus {ECO:0000250|UniProtKB:O22446}.	osa:4328717;	PF00850;
1138	LOC_Os01g69070	15.0728	3.6489	0.741538	1.39e-07	1.57e-06	auxin efflux carrier component, putative, expressed	Os01g0919800	OsPIN5a, OsPIN6			Q5JLM1	PIN5A_ORYSJ	reviewed	Probable auxin efflux carrier component 5a (OsPIN5a)	PIN5A Os01g0919800 LOC_Os01g69070 P0678F11.27	endoplasmic reticulum [GO:0005783]; integral component of membrane [GO:0016021]; plasma membrane [GO:0005886]; auxin efflux transmembrane transporter activity [GO:0010329]; auxin efflux [GO:0010315]; auxin homeostasis [GO:0010252]; auxin polar transport [GO:0009926]; auxin-activated signaling pathway [GO:0009734]	SUBCELLULAR LOCATION: Membrane {ECO:0000255}; Multi-pass membrane protein {ECO:0000255}.	osa:4324368;	PF03547;
2150	LOC_Os02g56310	224.403	3.64	0.255685	6.48e-47	2.92e-44	calcium-dependent protein kinase isoform AK1, putative, expressed	Os02g0807000	OsPPCK1			Q6K8E6	Q6K8E6_ORYSJ	unreviewed	Os02g0807000 protein	Os02g0807000 OSNPB_020807000	cytoplasm [GO:0005737]; nucleus [GO:0005634]; ATP binding [GO:0005524]; calcium-dependent protein serine/threonine kinase activity [GO:0009931]; calmodulin binding [GO:0005516]; intracellular signal transduction [GO:0035556]; peptidyl-serine phosphorylation [GO:0018105]; protein autophosphorylation [GO:0046777]		osa:4331076;	PF00069;
8551	LOC_Os12g36830	2927.29	3.63307	0.282016	4.37e-39	1.24e-36	pathogenesis-related Bet v I family protein, putative, expressed	Os12g0555000	RSOsPR10, RsOsPR10a, OsPR10a, OsPR10alpha, OsPR10, PR10			Q75T45	Q75T45_ORYSJ	unreviewed	Os12g0555000 protein (Pathogenesis-related protein) (Pathogenesis-related protein 10) (Pathogenesis-related protein 10, putative, expressed) (Root specific pathogenesis-related protein 10) (cDNA clone:001-030-C06, full insert sequence)	RSOsPR10 LOC_Os12g36830 Os12g0555000 OSNPB_120555000	cytoplasm [GO:0005737]; nucleus [GO:0005634]; abscisic acid binding [GO:0010427]; protein phosphatase inhibitor activity [GO:0004864]; signaling receptor activity [GO:0038023]; abscisic acid-activated signaling pathway [GO:0009738]; regulation of protein serine/threonine phosphatase activity [GO:0080163]		osa:4352487;	PF10604;
8438	LOC_Os12g22980	2.44686	3.6253	3.02671	0.0045836	0.0178605	retrotransposon protein, putative, Ty3-gypsy subclass, expressed	NA	NA			Q2QST7	Q2QST7_ORYSJ	unreviewed	Retrotransposon protein, putative, Ty3-gypsy subclass	LOC_Os12g22980				PF03732;
7528	LOC_Os10g38350	26.014	3.61705	0.613258	3.82e-10	6.35e-09	glutathione S-transferase, putative, expressed	Os10g0527601	OsGSTU20			Q8RUS1	Q8RUS1_ORYSJ	unreviewed	Glutathione S-transferase GSTU6, putative, expressed	LOC_Os10g38350	transferase activity [GO:0016740]			PF02798;
6420	LOC_Os08g26050	10.6439	3.60011	0.907024	1.08e-05	8.64e-05	hypothetical protein	NA	NA			Q6YZU2	Q6YZU2_ORYSJ	unreviewed	Uncharacterized protein	OSJNBa0012O03.6 P0404D10.42
417	LOC_Os01g27160	22.863	3.59516	0.613551	6.54e-10	1.05e-08	cullin, putative, expressed	Os01g0369366				Q93VL5	Q93VL5_ORYSJ	unreviewed	Cullin-like protein (Os01g0369200 protein)	P0560B06.32 Os01g0369200 OSNPB_010369200	ubiquitin protein ligase binding [GO:0031625]; ubiquitin-dependent protein catabolic process [GO:0006511]		osa:4325736;	PF00888;PF10557;
418	LOC_Os01g27160	22.863	3.59516	0.613551	6.54e-10	1.05e-08	cullin, putative, expressed	Os01g0369200	OsCUL1-3			Q93VL5	Q93VL5_ORYSJ	unreviewed	Cullin-like protein (Os01g0369200 protein)	P0560B06.32 Os01g0369200 OSNPB_010369200	ubiquitin protein ligase binding [GO:0031625]; ubiquitin-dependent protein catabolic process [GO:0006511]		osa:4325736;	PF00888;PF10557;
1850	LOC_Os02g43360	326.137	3.59444	0.209745	6.72e-67	9.62e-64	cytochrome b5-like Heme/Steroid binding domain containing protein, expressed	Os02g0649800				A0A0P0VMK6	A0A0P0VMK6_ORYSJ	unreviewed	Os02g0649800 protein (Putative cytochrome b5)	Os02g0649800 OsJ_07729 OSJNBb0012J10.1 P0048B08.25	integral component of membrane [GO:0016021]; heme binding [GO:0020037]; metal ion binding [GO:0046872]		osa:4330160;	PF00173;
3724	LOC_Os04g40580	4.48084	3.5892	1.62059	0.00150352	0.00688039	O-acyltransferase, putative, expressed	Os04g0481800				Q7XT56	Q7XT56_ORYSJ	unreviewed	Os04g0481800 protein (cDNA clone:002-155-F11, full insert sequence)	Os04g0481800 OSNPB_040481800	integral component of membrane [GO:0016021]; O-acyltransferase activity [GO:0008374]		osa:4336190;	PF13813;
3443	LOC_Os04g10060	75.1901	3.58811	0.445429	7.18e-17	2.88e-15	ent-kaurene synthase, chloroplast precursor, putative, expressed	Os04g0179700	OsKS4, KS4, KSL4, OsKSL4, DTS2, OsDTS2, OsTPS16, TPS16			Q0JEZ8	KSL4_ORYSJ	reviewed	Syn-pimara-7,15-diene synthase (EC 4.2.3.35) (9-beta-pimara-7,15-diene synthase) (Ent-kaurene synthase-like 4) (OsKS4) (OsKSL4) (OsDTS2)	KSL4 DTS2 Os04g0179700 LOC_Os04g10060 OsJ_013413 OSJNBa0052P16.14	magnesium ion binding [GO:0000287]; syn-pimara-7,15-diene synthase activity [GO:0034279]; terpene synthase activity [GO:0010333]; defense response [GO:0006952]; diterpenoid biosynthetic process [GO:0016102]		osa:4335094;	PF01397;PF03936;
7294	LOC_Os10g21990	8.73458	3.57985	1.05906	9.56e-05	0.000606181	retrotransposon protein, putative, unclassified, expressed	NA	NA			Q8S6M7	Q8S6M7_ORYSJ	unreviewed	Uncharacterized protein	LOC_Os10g21990				PF18052;
3536	LOC_Os04g29930	14.5275	3.57726	0.765921	4.32e-07	4.49e-06	OsWAK42 - OsWAK receptor-like protein kinase, expressed	NA	NA			B9FEP8	B9FEP8_ORYSJ	unreviewed	Protein kinase domain-containing protein	OsJ_14444	integral component of membrane [GO:0016021]; ATP binding [GO:0005524]; calcium ion binding [GO:0005509]; protein kinase activity [GO:0004672]			PF00069;
6417	LOC_Os08g25839	44.4662	3.56489	0.433318	2.59e-17	1.1e-15	expressed protein	Os08g0346900				A0A0P0XEP6	A0A0P0XEP6_ORYSJ	unreviewed	Os08g0346900 protein	Os08g0346900 OSNPB_080346900
6226	LOC_Os08g03420	69.4855	3.55821	0.529925	1.45e-12	3.35e-11	kelch repeat protein, putative, expressed	Os08g0128000				Q6ZK44	Q6ZK44_ORYSJ	unreviewed	Os08g0128000 protein (cDNA clone:J023013D19, full insert sequence) (cDNA clone:J033150H12, full insert sequence)	Os08g0128000 OSNPB_080128000			osa:4344575;	PF01344;
1057	LOC_Os01g65830	99.8328	3.54812	0.506568	1.88e-13	4.84e-12	acyl-desaturase, chloroplast precursor, putative, expressed	Os01g0880800				Q8LJJ9	STAD1_ORYSJ	reviewed	Stearoyl-[acyl-carrier-protein] 9-desaturase 1, chloroplastic (Stearoyl-ACP desaturase 1) (EC 1.14.19.2) (Acyl-[acyl-carrier-protein] desaturase 1)	Os01g0880800 LOC_Os01g65830 P0018C10.55	chloroplast stroma [GO:0009570]; acyl-[acyl-carrier-protein] desaturase activity [GO:0045300]; metal ion binding [GO:0046872]; stearoyl-[acp] desaturase activity [GO:0102786]; fatty acid biosynthetic process [GO:0006633]; fatty acid metabolic process [GO:0006631]	SUBCELLULAR LOCATION: Plastid, chloroplast {ECO:0000305}.	osa:4324844;	PF03405;
7181	LOC_Os10g03640	12.2051	3.54704	0.852268	4.59e-06	3.94e-05	expressed protein	NA	NA			Q33BA7	Q33BA7_ORYSJ	unreviewed	Uncharacterized protein	LOC_Os10g03640				PF05879;
7366	LOC_Os10g28350	495.865	3.54459	0.21168	5.4e-64	6.26e-61	1,2-dihydroxy-3-keto-5-methylthiopentene dioxygenase protein, putative, expressed	Os10g0419400	Sip2, OsARD1, ARD1, OsIDI1, IDI1, OsIDI1L/OsARD1			A1L4T4	MTND1_ORYSJ	reviewed	1,2-dihydroxy-3-keto-5-methylthiopentene dioxygenase 1 (EC 1.13.11.54) (Acireductone dioxygenase (Fe(2+)-requiring) 1) (ARD 1) (Fe-ARD 1) (OsIDI1) (Submergence-induced protein 2)	ARD1 SIP2 Os10g0419400 LOC_Os10g28350 OSJNBa0006I13.11	cytoplasm [GO:0005737]; nucleus [GO:0005634]; acireductone dioxygenase [iron(II)-requiring] activity [GO:0010309]; iron ion binding [GO:0005506]; L-methionine salvage from methylthioadenosine [GO:0019509]; methionine metabolic process [GO:0006555]	SUBCELLULAR LOCATION: Cytoplasm {ECO:0000255|HAMAP-Rule:MF_03154}. Nucleus {ECO:0000255|HAMAP-Rule:MF_03154}.		PF03079;
60	LOC_Os01g03630	2.32317	3.5405	2.98306	0.00472464	0.0183166	multicopper oxidase domain containing protein, expressed	Os01g0127000	OsLPR3			Q5ZE00	LPR3_ORYSJ	reviewed	Multicopper oxidase LPR1 homolog 3 (EC 1.-.-.-)	LPR3 Os01g0127000 LOC_Os01g03630 P0409B08.15	endoplasmic reticulum membrane [GO:0005789]; copper ion binding [GO:0005507]; oxidoreductase activity [GO:0016491]	SUBCELLULAR LOCATION: Endoplasmic reticulum membrane {ECO:0000250|UniProtKB:F4I4K5}; Peripheral membrane protein {ECO:0000250|UniProtKB:F4I4K5}.		PF00394;PF07731;PF07732;
4039	LOC_Os04g54310	36.057	3.53971	0.475699	1.3e-14	3.97e-13	expressed protein	NA	NA			Q0J9R4	Q0J9R4_ORYSJ	unreviewed	Os04g0635600 protein	Os04g0635600 OsJ_16311				PF12609;
7155	LOC_Os09g39650	160.357	3.538	0.267757	7.53e-41	2.44e-38	protein kinase family protein, putative, expressed	Os09g0570100	OsRLCK282			B9G572	B9G572_ORYSJ	unreviewed	Protein kinase domain-containing protein	OsJ_30416	ATP binding [GO:0005524]; protein kinase activity [GO:0004672]			PF00069;
4478	LOC_Os05g30350	152.136	3.53738	0.249744	1.66e-46	7.06e-44	Os5bglu22 - beta-glucosidase homologue, similar to G. max isohydroxyurate hydrolase, expressed	Os05g0366600	Os5bglu22, Os5Bglu22			Q60DX8	BGL22_ORYSJ	reviewed	Beta-glucosidase 22 (Os5bglu22) (EC 3.2.1.21)	BGLU22 Os05g0366600 LOC_Os05g30350 OSJNBa0090H02.10	beta-glucosidase activity [GO:0008422]; scopolin beta-glucosidase activity [GO:0102483]; carbohydrate metabolic process [GO:0005975]		osa:4338560;	PF00232;
5707	LOC_Os07g09630	118.747	3.53703	0.442294	8.68e-17	3.44e-15	oxidoreductase, putative, expressed	Os07g0194500				A0A0P0X3D5	A0A0P0X3D5_ORYSJ	unreviewed	Os07g0194500 protein	Os07g0194500	endoplasmic reticulum [GO:0005783]; iron ion binding [GO:0005506]; L-ascorbic acid binding [GO:0031418]; oxidoreductase activity, acting on paired donors, with incorporation or reduction of molecular oxygen [GO:0016705]; peptidyl-proline hydroxylation to 4-hydroxy-L-proline [GO:0018401]		osa:4342642;	PF13640;
7295	LOC_Os10g22020	12.034	3.52904	0.81912	2.59e-06	2.34e-05	RGH2B, putative, expressed	NA	NA			A0A0P0XUC2	A0A0P0XUC2_ORYSJ	unreviewed	Uncharacterized protein	OSJNBb0089F16.3
8175	LOC_Os11g47510	10.2388	3.52841	0.942054	2.54e-05	0.000185947	glycosyl hydrolase, putative, expressed	Os11g0701000				Q53NL1	Q53NL1_ORYSJ	unreviewed	Os11g0701000 protein (Xylanase inhibitor protein 1, putative, expressed) (cDNA clone:J033125A18, full insert sequence)	LOC_Os11g47510 Os11g0701000 OSNPB_110701000	extracellular region [GO:0005576]; chitinase activity [GO:0004568]; xylan catabolic process [GO:0045493]		osa:4351186;	PF00704;
3910	LOC_Os04g49194	111.454	3.5256	0.305454	1.02e-31	1.78e-29	naringenin,2-oxoglutarate 3-dioxygenase, putative, expressed	Os04g0581000	2-ODD3, Os2-ODD3, Os2ODD3			A0A0P0WE88	A0A0P0WE88_ORYSJ	unreviewed	Uncharacterized protein	OsJ_15896	dioxygenase activity [GO:0051213]; metal ion binding [GO:0046872]		osa:4336764;	PF03171;PF14226;
2737	LOC_Os03g22410	10.2176	3.52518	0.906996	1.49e-05	0.000115131	DUF567 domain containing protein, putative, expressed	NA	NA			A3AHU6	A3AHU6_ORYSJ	unreviewed	Uncharacterized protein	OsJ_10810	translation initiation factor activity [GO:0003743]		osa:107277801;	PF04525;
7654	LOC_Os10g42040	35.3074	3.52074	0.627851	1.73e-09	2.61e-08	expressed protein	Os10g0570200				B9G745	B9G745_ORYSJ	unreviewed	Os10g0570200 protein	Os10g0570200 OsJ_32534
6405	LOC_Os08g24750	35.5755	3.5177	0.492165	1.13e-13	3e-12	xyloglucan fucosyltransferase, putative, expressed	Os08g0334900				Q6YUI8	Q6YUI8_ORYSJ	unreviewed	Os08g0334900 protein (cDNA clone:001-022-G05, full insert sequence)	Os08g0334900 OSNPB_080334900	Golgi apparatus [GO:0005794]; integral component of membrane [GO:0016021]; galactoside 2-alpha-L-fucosyltransferase activity [GO:0008107]; xyloglucan biosynthetic process [GO:0009969]		osa:4345303;	PF03254;
4038	LOC_Os04g54300	63.6891	3.50088	0.521202	1.34e-12	3.12e-11	wound induced protein, putative, expressed	Os04g0635500				Q7XQS3	Q7XQS3_ORYSJ	unreviewed	Os04g0635500 protein	Os04g0635500 OSNPB_040635500			osa:4337133;	PF12609;
5508	LOC_Os06g49190	2.28023	3.49701	2.99144	0.00491908	0.0189556	LTPL154 - Protease inhibitor/seed storage/LTP family protein precursor, expressed	Os06g0705400	OsLTP2.6, OsLtpII.6			Q5Z8V0	Q5Z8V0_ORYSJ	unreviewed	Os06g0705400 protein (cDNA clone:001-105-F12, full insert sequence)	Os06g0705400 OSNPB_060705400	lipid transport [GO:0006869]		osa:4342003;
1511	LOC_Os02g15560	42.3284	3.47989	0.458728	4.11e-15	1.34e-13	transposon protein, putative, Mutator sub-class, expressed	NA	NA			C7IY26	C7IY26_ORYSJ	unreviewed	Os02g0254800 protein	Os02g0254800	zinc ion binding [GO:0008270]			PF04434;
2	ChrSy.fgenesh.gene.47	33.5338	3.4748	0.533126	7.01e-12	1.48e-10	expressed protein	NA	NA			Q6ZDA6	Q6ZDA6_ORYSJ	unreviewed	Os08g0155900 protein	Os08g0155900 OSNPB_080155900
677	LOC_Os01g48940	4.3919	3.47171	1.65776	0.00184718	0.00824103	expressed protein	Os01g0681700				Q5QLF7	Q5QLF7_ORYSJ	unreviewed	Uncharacterized protein P0019E03.26	P0019E03.26
2846	LOC_Os03g31760	2.27895	3.47169	3.01659	0.00508297	0.0194699	expressed protein	Os03g0432200				Q10J67	Q10J67_ORYSJ	unreviewed	Expressed protein	OSJNBa0036E17.9	integral component of membrane [GO:0016021]
5424	LOC_Os06g45970	4.19785	3.46065	1.64643	0.00198129	0.00875707	OsSAUR26 - Auxin-responsive SAUR gene family member, expressed	Os06g0671600	OsSAUR26			A3AX83	A3AX83_ORYSJ	unreviewed	OSJNBa0060N03.10 protein (Os04g0608300 protein)	Os04g0608300 OsJ_16092 OSJNBa0060N03.10	response to auxin [GO:0009733]			PF02519;
5212	LOC_Os06g27910	38.9501	3.45774	0.502611	5.7e-13	1.38e-11	oleosin, putative, expressed	Os06g0473700				Q0DC80	Q0DC80_ORYSJ	unreviewed	Os06g0473800 protein	Os06g0473800 OSNPB_060473800	integral component of membrane [GO:0016021]; monolayer-surrounded lipid storage body [GO:0012511]; lipid storage [GO:0019915]; response to freezing [GO:0050826]; seed oilbody biogenesis [GO:0010344]		osa:9270007;	PF01277;
5213	LOC_Os06g27910	38.9501	3.45774	0.502611	5.7e-13	1.38e-11	oleosin, putative, expressed	Os06g0473800				Q0DC80	Q0DC80_ORYSJ	unreviewed	Os06g0473800 protein	Os06g0473800 OSNPB_060473800	integral component of membrane [GO:0016021]; monolayer-surrounded lipid storage body [GO:0012511]; lipid storage [GO:0019915]; response to freezing [GO:0050826]; seed oilbody biogenesis [GO:0010344]		osa:9270007;	PF01277;
7381	LOC_Os10g30390	19.1348	3.45637	0.673273	3.75e-08	4.6e-07	cytochrome P450, putative, expressed	Os10g0439800	Oscyp71Z4			A3C548	A3C548_ORYSJ	unreviewed	Uncharacterized protein	OsJ_31662	membrane [GO:0016020]; heme binding [GO:0020037]; iron ion binding [GO:0005506]; oxidoreductase activity, acting on paired donors, with incorporation or reduction of molecular oxygen, NAD(P)H as one donor, and incorporation of one atom of oxygen [GO:0016709]		osa:4348721;	PF00067;
6118	LOC_Os07g47230	22.7632	3.43982	0.600655	1.34e-09	2.05e-08	TKL_IRAK_DUF26-lh.10 - DUF26 kinases have homology to DUF26 containing loci, expressed	Os07g0668500				Q7F0M5	Q7F0M5_ORYSJ	unreviewed	Uncharacterized protein	P0450A04.142 P0625E02.109	integral component of membrane [GO:0016021]; ATP binding [GO:0005524]; protein kinase activity [GO:0004672]			PF07714;PF01657;
6337	LOC_Os08g13420	21.3624	3.43215	0.715392	1.64e-07	1.83e-06	S-domain receptor-like protein kinase, putative, expressed	Os08g0230800	OsLecRK paralog			Q6ZCR4	Q6ZCR4_ORYSJ	unreviewed	Receptor-like serine/threonine-protein kinase (EC 2.7.11.1)	Os08g0230800 P0461A06.11	integral component of membrane [GO:0016021]; ATP binding [GO:0005524]; protein serine/threonine kinase activity [GO:0004674]; recognition of pollen [GO:0048544]		osa:9269085;	PF01453;PF00069;PF00954;
228	LOC_Os01g11480	6.3045	3.43182	1.35285	0.00130069	0.0060547	zinc finger, C3HC4 type domain containing protein, expressed	NA	NA			Q5QN57	Q5QN57_ORYSJ	unreviewed	Os01g0213000 protein	Os01g0213000 OSJNBa0038J17.11	integral component of membrane [GO:0016021]		osa:4325571;	PF13639;
7866	LOC_Os11g10510	6200.87	3.43172	0.239044	9.27e-48	4.25e-45	dehydrogenase, putative, expressed	Os11g0210500	Adh2*, Adh2			A0A0R7VIL1	A0A0R7VIL1_ORYSJ	unreviewed	Alcohol dehydrogenase 2		oxidoreductase activity [GO:0016491]; zinc ion binding [GO:0008270]		osa:4350054;	PF08240;PF00107;
4525	LOC_Os05g33310	452.96	3.42798	0.230203	3.37e-51	1.78e-48	oxidoreductase, 2OG-Fe oxygenase family protein, putative, expressed	Os05g0401500				B9FIC9	B9FIC9_ORYSJ	unreviewed	Fe2OG dioxygenase domain-containing protein	OsJ_18483	metal ion binding [GO:0046872]; oxidoreductase activity [GO:0016491]			PF03171;
8016	LOC_Os11g31920	2.236	3.42481	3.02712	0.0052968	0.0201651	retrotransposon protein, putative, unclassified, expressed	NA	NA			Q2R3H4	Q2R3H4_ORYSJ	unreviewed	Retrotransposon protein, putative, unclassified, expressed	LOC_Os11g31920	nucleic acid binding [GO:0003676]; RNA-DNA hybrid ribonuclease activity [GO:0004523]; DNA integration [GO:0015074]			PF03732;PF00665;PF00078;PF13456;
5313	LOC_Os06g39240	8.04877	3.42363	1.1039	0.000233113	0.00134192	endothelial differentiation-related factor 1, putative, expressed	Os06g0592500				A0A0P0WYA0	A0A0P0WYA0_ORYSJ	unreviewed	Os06g0592500 protein (Putative ethylene-responsive transcriptional coactivator)	Os06g0592500 OsJ_21850 P0502H06.26	nucleolus [GO:0005730]; nucleus [GO:0005634]; DNA binding [GO:0003677]; transcription coactivator activity [GO:0003713]; response to abscisic acid [GO:0009737]; response to heat [GO:0009408]; response to water deprivation [GO:0009414]		osa:4341420;	PF01381;PF08523;
7265	LOC_Os10g18150	11.3842	3.42309	0.83125	5.6e-06	4.72e-05	crooked neck, putative, expressed	Os10g0328700				Q8S5Y7	Q8S5Y7_ORYSJ	unreviewed	Crooked neck protein, putative, expressed (Os10g0328700 protein) (cDNA clone:J023047D02, full insert sequence)	LOC_Os10g18150 Os10g0328700 OSNPB_100328700	catalytic step 2 spliceosome [GO:0071013]; post-mRNA release spliceosomal complex [GO:0071014]; Prp19 complex [GO:0000974]; U2-type catalytic step 2 spliceosome [GO:0071007]; mRNA splicing, via spliceosome [GO:0000398]; spliceosomal complex assembly [GO:0000245]		osa:4348330;
6424	LOC_Os08g26360	9.80669	3.41548	0.99132	6.87e-05	0.000452927	expressed protein	NA	NA			Q6YX75	Q6YX75_ORYSJ	unreviewed	Uncharacterized protein	OSJNBa0028A18.1 P0475C12.36
7118	LOC_Os09g37690	36.7988	3.40834	0.448991	4.19e-15	1.36e-13	flavin-containing monooxygenase family protein, putative, expressed	Os09g0549300				Q69NI6	Q69NI6_ORYSJ	unreviewed	Flavin-containing monooxygenase (EC 1.-.-.-)	Os09g0549300 OSNPB_090549300	flavin adenine dinucleotide binding [GO:0050660]; N,N-dimethylaniline monooxygenase activity [GO:0004499]; NADP binding [GO:0050661]		osa:4347777;	PF00743;
4461	LOC_Os05g29710	196.681	3.40662	0.754255	3.85e-07	4.04e-06	RING-H2 finger protein, putative, expressed	Os05g0360400				Q5KQA8	Q5KQA8_ORYSJ	unreviewed	Os05g0360400 protein (cDNA clone:001-206-E07, full insert sequence)	Os05g0360400 OSNPB_050360400	integral component of membrane [GO:0016021]; protein ubiquitination [GO:0016567]			PF13639;
1347	LOC_Os02g06200	4.03382	3.39689	1.62285	0.00207457	0.00911303	phytosulfokine receptor precursor, putative, expressed	Os02g0156600				A0A0P0VEX0	A0A0P0VEX0_ORYSJ	unreviewed	Os02g0156600 protein	Os02g0156600 OSNPB_020156600	integral component of membrane [GO:0016021]			PF00560;PF13855;PF08263;
7828	LOC_Os11g07260	9.34137	3.39574	0.908646	2.83e-05	0.000205146	expressed protein	Os11g0173800				Q53PF7	Q53PF7_ORYSJ	unreviewed	Leucine Rich Repeat, putative	LOC_Os11g07260 OsJ_33142	integral component of membrane [GO:0016021]; ATP binding [GO:0005524]; protein serine/threonine kinase activity [GO:0004674]			PF00560;PF12799;PF13855;PF08263;PF00069;
5606	LOC_Os07g03200	6.02337	3.38971	1.32322	0.00128118	0.00598221	phytosulfokines precursor, putative, expressed	Os07g0124100	OsPSK4, Psk4			Q9AR88	PSK4_ORYSJ	reviewed	Phytosulfokines 4 [Cleaved into: Phytosulfokine-alpha (PSK-alpha) (Phytosulfokine-a); Phytosulfokine-beta (PSK-beta) (Phytosulfokine-b)]	PSK4 Os07g0124100 LOC_Os07g03200 OJ1007_H09.107 OsJ_22943 OSJNBa0057M23.146 P0474G09.107	extracellular region [GO:0005576]; growth factor activity [GO:0008083]; cell differentiation [GO:0030154]; cell population proliferation [GO:0008283]; multicellular organism development [GO:0007275]	SUBCELLULAR LOCATION: Secreted {ECO:0000250}.	osa:4342304;	PF06404;
4479	LOC_Os05g30490	2.60228	3.38569	3.45247	0.00620523	0.0229519	harpin-induced protein 1 domain containing protein, expressed	Os05g0367900				A0A0N7KKM8	A0A0N7KKM8_ORYSJ	unreviewed	Os05g0367900 protein	Os05g0367900	anchored component of plasma membrane [GO:0046658]; integral component of membrane [GO:0016021]; plasmodesma [GO:0009506]		osa:4338569;	PF03168;
8191	LOC_Os11g48110	9.61851	3.38285	0.975025	6.26e-05	0.000417474	phenylalanine ammonia-lyase, putative, expressed	Os11g0708900	PAL03, OsPAL8			Q53NW6	Q53NW6_ORYSJ	unreviewed	Phenylalanine ammonia-lyase (EC 4.3.1.24)	LOC_Os11g48110 Os11g0708900 OSNPB_110708900	cytoplasm [GO:0005737]; ammonia-lyase activity [GO:0016841]; phenylalanine ammonia-lyase activity [GO:0045548]; cinnamic acid biosynthetic process [GO:0009800]; L-phenylalanine catabolic process [GO:0006559]	SUBCELLULAR LOCATION: Cytoplasm {ECO:0000256|RuleBase:RU003955}.	osa:4351235;	PF00221;
3442	LOC_Os04g10010	54.3322	3.37216	0.513834	4.26e-12	9.35e-11	sex determination protein tasselseed-2, putative, expressed	Os04g0179200	OsMAS, MAS1, OsMAS1, OsMAS/SDR110C-MS1, SDR110C-MS1			J3JRU2	J3JRU2_ORYSJ	unreviewed	Uncharacterized protein		oxidoreductase activity [GO:0016491]		osa:4335093;
5474	LOC_Os06g48000	6.16425	3.37123	1.33214	0.00129098	0.00601986	peroxidase precursor, putative, expressed	Os06g0695200	prx93			Q0D9W2	Q0D9W2_ORYSJ	unreviewed	Os06g0695200 protein	Os06g0695200	extracellular region [GO:0005576]; heme binding [GO:0020037]; metal ion binding [GO:0046872]; peroxidase activity [GO:0004601]; hydrogen peroxide catabolic process [GO:0042744]; response to oxidative stress [GO:0006979]		osa:4341932;	PF00141;
4870	LOC_Os05g51050	5.76927	3.37057	1.22989	0.000912984	0.00445004	acyl-protein thioesterase, putative, expressed	Os05g0588100				Q6L5B6	Q6L5B6_ORYSJ	unreviewed	Abhydrolase_2 domain-containing protein	OJ1007_H05.14 OsJ_19726	hydrolase activity [GO:0016787]			PF02230;
7324	LOC_Os10g25170	114.568	3.36812	0.382307	1.03e-19	5.56e-18	AP2 domain containing protein, expressed	Os10g0390800	OsERF#059, OsERF059, OsERF59, EBL1, AP2/EREBP#006, AP2/EREBP6			Q338N5	Q338N5_ORYSJ	unreviewed	AP2 domain containing protein, expressed	LOC_Os10g25170	nucleus [GO:0005634]; DNA binding [GO:0003677]; DNA-binding transcription factor activity [GO:0003700]	SUBCELLULAR LOCATION: Nucleus {ECO:0000256|SAAS:SAAS00550310}.		PF00847;
2660	LOC_Os03g19270	74.2902	3.36773	0.52824	1.3e-11	2.67e-10	universal stress protein domain containing protein, putative, expressed	Os03g0305400				A3AH58	A3AH58_ORYSJ	unreviewed	Usp domain-containing protein	OsJ_10550				PF00582;
2661	LOC_Os03g19270	74.2902	3.36773	0.52824	1.3e-11	2.67e-10	universal stress protein domain containing protein, putative, expressed	Os03g0305400				Q10MK6	Q10MK6_ORYSJ	unreviewed	Universal stress protein family protein, expressed	LOC_Os03g19270				PF00582;
2662	LOC_Os03g19270	74.2902	3.36773	0.52824	1.3e-11	2.67e-10	universal stress protein domain containing protein, putative, expressed	Os03g0305400				Q0DSJ2	Q0DSJ2_ORYSJ	unreviewed	Os03g0305400 protein	Os03g0305400	vacuole [GO:0005773]			PF00582;
2274	LOC_Os03g03724	57.1245	3.36483	0.375386	3.71e-20	2.1e-18	NA	Os03g0129400				NA	NA	NA	NA	NA	NA	NA	NA	NA
4526	LOC_Os05g33320	82.0687	3.3597	0.359387	9.1e-22	6.01e-20	expressed protein	NA	NA			Q6ATY0	Q6ATY0_ORYSJ	unreviewed	Uncharacterized protein	OSJNBa0035J16.13
5483	LOC_Os06g48250	37.8927	3.34931	0.468745	9.24e-14	2.48e-12	ATPase, putative, expressed	Os06g0697600				Q5Z6G1	Q5Z6G1_ORYSJ	unreviewed	Os06g0697600 protein	Os06g0697600 OSNPB_060697600	ATP binding [GO:0005524]		osa:4341948;	PF00004;PF14363;
5357	LOC_Os06g42190	2.25875	3.34316	3.13509	0.00585508	0.0218864	retrotransposon protein, putative, unclassified, expressed	NA	NA			Q7X5X7	Q7X5X7_ORYSJ	unreviewed	OSJNBa0081C01.21 protein (OSJNBb0039L24.2 protein)	OSJNBa0081C01.21 OSJNBb0039L24.2	nucleic acid binding [GO:0003676]; RNA-DNA hybrid ribonuclease activity [GO:0004523]; DNA integration [GO:0015074]			PF03732;PF17917;PF00665;PF00078;PF13456;
7207	LOC_Os10g07110	2.37107	3.34113	3.28206	0.00618596	0.0228876	retrotransposon, putative, centromere-specific, expressed	NA	NA			Q8LMD6	Q8LMD6_ORYSJ	unreviewed	Uncharacterized protein	LOC_Os10g07110
227	LOC_Os01g11460	9.36746	3.33669	0.965261	6.66e-05	0.000440824	zinc finger, C3HC4 type domain containing protein, expressed	Os01g0212700				Q5QN60	Q5QN60_ORYSJ	unreviewed	cDNA clone:002-141-F12, full insert sequence		integral component of membrane [GO:0016021]		osa:4325570;	PF13639;
5177	LOC_Os06g20050	12.7241	3.33049	0.78391	2.72e-06	2.45e-05	NBS type disease resistance protein, putative, expressed	Os06g0304700				Q5Z4E4	Q5Z4E4_ORYSJ	unreviewed	Putative disease resistance protein	B1386G10.7	ADP binding [GO:0043531]			PF00931;PF18052;
5182	LOC_Os06g20790	145.795	3.31938	0.403384	1.51e-17	6.54e-16	SAM dependent carboxyl methyltransferase, putative, expressed	Os06g0313440				A3BB44	A3BB44_ORYSJ	unreviewed	Uncharacterized protein	OsJ_21120	methyltransferase activity [GO:0008168]		osa:9269280;	PF03492;
7322	LOC_Os10g25130	6438.25	3.31384	0.225272	3.41e-50	1.73e-47	aminotransferase, classes I and II, domain containing protein, expressed	Os10g0390500	alaAT, ALT-1, OsAlaAT1, AlaAT1			Q0IXZ0	Q0IXZ0_ORYSJ	unreviewed	Os10g0390500 protein	Os10g0390500 OsJ_31385	pyridoxal phosphate binding [GO:0030170]; transaminase activity [GO:0008483]; biosynthetic process [GO:0009058]		osa:4348524;	PF00155;
7652	LOC_Os10g42020	843.899	3.30213	0.69591	1.32e-07	1.49e-06	RALFL29 - Rapid ALkalinization Factor RALF family protein precursor, expressed	Os10g0569800	RIR1b, Rir1b, OsRALF-30, OsRALF30, RALF-30, RALF30			Q7G1N9	Q7G1N9_ORYSJ	unreviewed	Expressed protein	LOC_Os10g42020
7653	LOC_Os10g42020	843.899	3.30213	0.69591	1.32e-07	1.49e-06	RALFL29 - Rapid ALkalinization Factor RALF family protein precursor, expressed	Os10g0569800	RIR1b, Rir1b, OsRALF-30, OsRALF30, RALF-30, RALF30			Q108X1	Q108X1_ORYSJ	unreviewed	Expressed protein (Os10g0569800 protein)	LOC_Os10g42020 Os10g0569800 OSNPB_100569800	integral component of membrane [GO:0016021]
4035	LOC_Os04g54230	10.7951	3.29158	0.851929	1.39e-05	0.000108038	wound induced protein, putative, expressed	Os04g0635000				A3AXS3	A3AXS3_ORYSJ	unreviewed	OSJNBa0043L09.18 protein (Os04g0635000 protein)	Os04g0635000 OsJ_16307 OSJNBa0043L09.18			osa:4337129;	PF12609;
6947	LOC_Os09g27260	52.8542	3.28988	0.4406	6.71e-15	2.12e-13	plant viral response family protein, putative, expressed	Os09g0444900				A0A0P0XNJ7	A0A0P0XNJ7_ORYSJ	unreviewed	Os09g0444900 protein (Fragment)	Os09g0444900 OSNPB_090444900	integral component of membrane [GO:0016021]			PF04819;
4676	LOC_Os05g41030	3.91609	3.28706	1.67217	0.00271372	0.0114475	LTPL67 - Protease inhibitor/seed storage/LTP family protein precursor, expressed	Os05g0489200	OsLTPG12, OsLTPg12			Q6AVM8	Q6AVM8_ORYSJ	unreviewed	cDNA clone:J023007E22, full insert sequence		integral component of membrane [GO:0016021]		osa:4339156;	PF14368;
364	LOC_Os01g21120	262.272	3.28377	0.333179	4.8e-24	4.05e-22	AP2 domain containing protein, expressed	Os01g0313300	OsERF#068, OsERF068, OsERF68, AP2/EREBP#003, AP2/EREBP3, ERF2			Q8LQ87	Q8LQ87_ORYSJ	unreviewed	Os01g0313300 protein (cDNA clone:J023075G11, full insert sequence)	Os01g0313300 OSNPB_010313300	nucleus [GO:0005634]; DNA binding [GO:0003677]; DNA-binding transcription factor activity [GO:0003700]	SUBCELLULAR LOCATION: Nucleus {ECO:0000256|SAAS:SAAS00550310}.	osa:4327287;	PF00847;
4828	LOC_Os05g48740	50.4394	3.28108	0.458919	7.84e-14	2.12e-12	expressed protein	Os05g0561400				Q0DFZ6	Q0DFZ6_ORYSJ	unreviewed	Os05g0561400 protein	Os05g0561400 OSNPB_050561400
5514	LOC_Os06g49340	28.1051	3.24734	0.636037	2.9e-08	3.6e-07	OsFBDUF35 - F-box and DUF domain containing protein, expressed	Os06g0707300	OsFbox326, Os_F0327			Q5Z8T5	Q5Z8T5_ORYSJ	unreviewed	Os06g0707300 protein (cDNA clone:J033041C08, full insert sequence)	Os06g0707300 OSNPB_060707300			osa:4342013;	PF03478;PF00646;
3135	LOC_Os03g55050	156.842	3.24679	0.238535	3.23e-43	1.19e-40	UDP-glucoronosyl and UDP-glucosyl transferase domain containing protein, expressed	Os03g0757600				A0A0P0W3N1	A0A0P0W3N1_ORYSJ	unreviewed	Os03g0757600 protein (Putative glucosyltransferase)	Os03g0757600 OsJ_12652 OSJNBa0040E01.14	intracellular membrane-bounded organelle [GO:0043231]; transferase activity, transferring hexosyl groups [GO:0016758]; UDP-glycosyltransferase activity [GO:0008194]		osa:4334167;	PF00201;
3493	LOC_Os04g20120	8.89998	3.24098	0.974954	0.000105099	0.000658613	retrotransposon protein, putative, unclassified, expressed	NA	NA			Q7X6J5	Q7X6J5_ORYSJ	unreviewed	OSJNBb0067G11.4 protein (OSJNBb0115I09.25 protein)	OSJNBb0067G11.4 OSJNBb0115I09.25	nucleic acid binding [GO:0003676]; DNA integration [GO:0015074]			PF13976;PF00665;PF07727;
6104	LOC_Os07g46520	65.3342	3.23855	0.358837	2.38e-20	1.38e-18	rhythmically expressed gene 2 protein, putative, expressed	Os07g0659400				Q8GRS0	Q8GRS0_ORYSJ	unreviewed	Os07g0659400 protein	OJ1477_F01.122 P0496C02.107 Os07g0659400	hydrolase activity [GO:0016787]			PF13419;
8553	LOC_Os12g36850	1523.24	3.23648	0.284867	5.14e-31	8.18e-29	pathogenesis-related Bet v I family protein, putative, expressed	Os12g0555200	RPR10b, PR-10b, PR10b, PBZ1, PBZ-1, OsPBZc, OsPR10b, BetV, OsBetV			Q0IMQ1	Q0IMQ1_ORYSJ	unreviewed	Os12g0555200 protein	Os12g0555200	cytoplasm [GO:0005737]; nucleus [GO:0005634]; abscisic acid binding [GO:0010427]; protein phosphatase inhibitor activity [GO:0004864]; signaling receptor activity [GO:0038023]; abscisic acid-activated signaling pathway [GO:0009738]; defense response [GO:0006952]; regulation of protein serine/threonine phosphatase activity [GO:0080163]		osa:4352488;	PF00407;
3486	LOC_Os04g17500	8.7205	3.2285	0.994632	0.000140155	0.000851662	expressed protein	Os04g0247700				Q7XWB3	Q7XWB3_ORYSJ	unreviewed	OSJNBa0061A09.13 protein	OSJNBa0061A09.13				PF01107;
584	LOC_Os01g43851	3.84938	3.21295	1.7188	0.0032265	0.0132341	cytochrome P450 72A1, putative, expressed	Os01g0628900				Q0JL26	Q0JL26_ORYSJ	unreviewed	Os01g0628900 protein	Os01g0628900 OSNPB_010628900	integral component of membrane [GO:0016021]; heme binding [GO:0020037]; iron ion binding [GO:0005506]; monooxygenase activity [GO:0004497]; oxidoreductase activity, acting on paired donors, with incorporation or reduction of molecular oxygen [GO:0016705]		osa:4326664;	PF00067;
8274	LOC_Os12g05050	211.548	3.20902	0.210869	2.9e-53	1.76e-50	stem-specific protein TSJT1, putative, expressed	Os12g0145100				Q0IQ53	Q0IQ53_ORYSJ	unreviewed	Os12g0145100 protein	Os12g0145100 OsJ_35204			osa:4351488;	PF12481;
3456	LOC_Os04g11120	4.99186	3.20675	2.19601	0.00483944	0.018702	expressed protein	NA	NA			Q7XP13	Q7XP13_ORYSJ	unreviewed	OSJNBb0013J13.7 protein	OSJNBb0013J13.7
3337	LOC_Os03g62670	5.51265	3.18773	1.32049	0.00181472	0.00811519	expressed protein	Os03g0843800	OsHOL1			A0A0P0W5N7	A0A0P0W5N7_ORYSJ	unreviewed	Putative methyl chloride transferase	OSJNBa0032G11.10 OsJ_13333	S-adenosylmethionine-dependent methyltransferase activity [GO:0008757]; methylation [GO:0032259]		osa:4334753;	PF05724;
3338	LOC_Os03g62670	5.51265	3.18773	1.32049	0.00181472	0.00811519	expressed protein	Os03g0843800	OsHOL1			Q10AR3	Q10AR3_ORYSJ	unreviewed	Thiopurine S-methyltransferase family protein, expressed	LOC_Os03g62670	S-adenosylmethionine-dependent methyltransferase activity [GO:0008757]; methylation [GO:0032259]			PF05724;
534	LOC_Os01g41050	7.09028	3.18756	1.09368	0.000414409	0.00223384	sulfate transporter, putative, expressed	Os01g0593700	OsSultr3;5, OsSul3;5			Q8LR58	Q8LR58_ORYSJ	unreviewed	Os01g0593700 protein	Os01g0593700 OSNPB_010593700	integral component of plasma membrane [GO:0005887]; anion:anion antiporter activity [GO:0015301]; secondary active sulfate transmembrane transporter activity [GO:0008271]	SUBCELLULAR LOCATION: Membrane {ECO:0000256|RuleBase:RU362052}; Multi-pass membrane protein {ECO:0000256|RuleBase:RU362052}.	osa:9266924;	PF01740;PF00916;
7204	LOC_Os10g06140	21.4574	3.18627	0.624847	3.71e-08	4.54e-07	OsWAK105 - OsWAK receptor-like protein kinase, expressed	Os10g0152000	OsWAK105, YK3			A0A5S6R8H1	A0A5S6R8H1_ORYSJ	unreviewed	Putative wall-associated protein kinase	OSJNBa0028C16.9 OsJ_30750	integral component of membrane [GO:0016021]; plasma membrane [GO:0005886]; ATP binding [GO:0005524]; calcium ion binding [GO:0005509]; polysaccharide binding [GO:0030247]; protein serine/threonine kinase activity [GO:0004674]; cell surface receptor signaling pathway [GO:0007166]; protein phosphorylation [GO:0006468]		osa:9269073;	PF07645;PF13947;PF00069;
333	LOC_Os01g18584	52.4327	3.17632	0.37615	3.61e-18	1.67e-16	WRKY9, expressed	Os01g0289600	OsWRKY9			Q9LGZ7	Q9LGZ7_ORYSJ	unreviewed	WRKY transcription factor 9	WRKY9	nucleus [GO:0005634]; DNA-binding transcription factor activity [GO:0003700]; sequence-specific DNA binding [GO:0043565]	SUBCELLULAR LOCATION: Nucleus {ECO:0000256|SAAS:SAAS00875356}.		PF03106;
5684	LOC_Os07g08420	32.3327	3.1743	0.547698	7.23e-10	1.15e-08	bZIP transcription factor domain containing protein, expressed	Os07g0182000	OsbZIP58, OsEnS-92, OsSMF1, SMF1, OsRISBZ1			Q6ZLB0	RSBZ1_ORYSJ	reviewed	bZIP transcription factor RISBZ1 (Rice seed bZIP1) (bZIP transcription factor 58) (OsbZIP58)	RISBZ1 BZIP58 Os07g0182000 LOC_Os07g08420 OJ1014_E09.42 OsJ_23334	nucleus [GO:0005634]; DNA-binding transcription factor activity [GO:0003700]; sequence-specific DNA binding [GO:0043565]; positive regulation of transcription, DNA-templated [GO:0045893]; regulation of starch biosynthetic process [GO:0010581]	SUBCELLULAR LOCATION: Nucleus {ECO:0000255|PROSITE-ProRule:PRU00978, ECO:0000269|PubMed:19473328}.	osa:4342570;	PF00170;PF12498;
765	LOC_Os01g52980	9.96442	3.1741	0.852863	2.55e-05	0.000186795	OsFBX23 - F-box domain containing protein, expressed	Os01g0730200	OsFbox036, OsFbox36, Os_F0051			A0A0P0V7U0	A0A0P0V7U0_ORYSJ	unreviewed	Os01g0730200 protein (Fragment)	Os01g0730200 OSNPB_010730200				PF00646;
8396	LOC_Os12g14520	2.31802	3.17227	3.46057	0.00707592	0.0256422	expressed protein	NA	NA			A3CGA9	A3CGA9_ORYSJ	unreviewed	Uncharacterized protein	OsJ_35716	cell surface receptor signaling pathway [GO:0007166]		osa:107277914;
7935	LOC_Os11g18670	5.22394	3.16717	1.28356	0.00179434	0.00803441	ubiquitin family protein, putative, expressed	NA	NA			Q2R6W3	Q2R6W3_ORYSJ	unreviewed	Ubiquitin family, putative	LOC_Os11g18670	ATP binding [GO:0005524]			PF00240;
5918	LOC_Os07g36740	5.25161	3.16327	1.26225	0.00160756	0.00729744	CSLF4 - cellulose synthase-like family F; beta1,3;1,4 glucan synthase, expressed	NA	NA			Q6ZF86	CSLF4_ORYSJ	reviewed	Mixed-linked glucan synthase 4 (EC 2.4.1.-) (1,3;1,4-beta-D-glucan synthase 4) (Cellulose synthase-like protein F4) (OsCslF4)	CSLF4 Os07g0553300 LOC_Os07g36740 P0013G11.11	Golgi apparatus [GO:0005794]; Golgi membrane [GO:0000139]; integral component of membrane [GO:0016021]; plasma membrane [GO:0005886]; trans-Golgi network [GO:0005802]; cellulose synthase (UDP-forming) activity [GO:0016760]; mannan synthase activity [GO:0051753]; cell wall organization [GO:0071555]; cellulose biosynthetic process [GO:0030244]; plant-type primary cell wall biogenesis [GO:0009833]	SUBCELLULAR LOCATION: Golgi apparatus membrane {ECO:0000305}; Multi-pass membrane protein {ECO:0000305}.	osa:4343554;	PF03552;
7491	LOC_Os10g36580	77.1868	3.16264	0.96124	5.38e-05	0.000366007	UP-9A, putative, expressed	Os10g0509401				Q94GY2	Q94GY2_ORYSJ	unreviewed	Uncharacterized protein	LOC_Os10g36580	cellular oxidant detoxification [GO:0098869]
8491	LOC_Os12g30824	72.821	3.16067	0.48454	4.78e-12	1.04e-10	terpene synthase, putative, expressed	Os12g0491800	OsKSL10, KS10, OsKS10, OsTPS33			Q2QQJ5	KSL10_ORYSJ	reviewed	Ent-sandaracopimara-8(14),15-diene synthase (EC 4.2.3.29) (Ent-kaurene synthase-like 10) (OsKSL10) (Ent-sandaracopimaradiene synthase) (Gamma-curcumene synthase) (EC 4.2.3.94)	KSL10 KS10 Os12g0491800 LOC_Os12g30824	ent-sandaracopimaradiene synthase activity [GO:0034280]; gamma-curcumene synthase activity [GO:0102064]; magnesium ion binding [GO:0000287]; terpene synthase activity [GO:0010333]; defense response [GO:0006952]; diterpenoid biosynthetic process [GO:0016102]		osa:4352248;	PF01397;PF03936;
3423	LOC_Os04g05650	72.3146	3.14659	0.40881	1.38e-15	4.81e-14	expressed protein	Os04g0142400				B9FDI0	B9FDI0_ORYSJ	unreviewed	OSJNBb0049I21.1 protein (Os04g0142400 protein)	Os04g0142400 OsJ_13677 OSJNBb0049I21.1			osa:4335019;
590	LOC_Os01g44050	719.099	3.1425	0.558875	1.35e-09	2.06e-08	siroheme synthase, putative, expressed	Os01g0631200				B9EY70	B9EY70_ORYSJ	unreviewed	TP_methylase domain-containing protein	OsJ_02706	NAD binding [GO:0051287]; precorrin-2 dehydrogenase activity [GO:0043115]; sirohydrochlorin ferrochelatase activity [GO:0051266]; uroporphyrin-III C-methyltransferase activity [GO:0004851]; cobalamin biosynthetic process [GO:0009236]; methylation [GO:0032259]; siroheme biosynthetic process [GO:0019354]			PF00590;
2164	LOC_Os02g56820	59.6763	3.14041	0.372081	3.12e-18	1.46e-16	OsFBX69 - F-box domain containing protein, expressed	Os02g0813166	OsFbox119, Os_F0693			A0A0P0VR75	A0A0P0VR75_ORYSJ	unreviewed	Os02g0813166 protein	Os02g0813166			osa:9267808;	PF14299;
4647	LOC_Os05g39560	118.836	3.13613	0.335932	1.02e-21	6.7e-20	metal cation transporter, putative, expressed	Os05g0472700	OsZIP5, OsZIP8, ZIP8, OsZIP9			Q6L8G0	ZIP5_ORYSJ	reviewed	Zinc transporter 5 (ZRT/IRT-like protein 5) (OsZIP5)	ZIP5 ZIP2 Os05g0472700 LOC_Os05g39560 P0015C02.14 P0486C01.1	integral component of membrane [GO:0016021]; membrane [GO:0016020]; plasma membrane [GO:0005886]; zinc ion transmembrane transporter activity [GO:0005385]; zinc ion transmembrane transport [GO:0071577]; zinc ion transport [GO:0006829]	SUBCELLULAR LOCATION: Cell membrane {ECO:0000269|PubMed:20419467}; Multi-pass membrane protein {ECO:0000269|PubMed:20419467}.	osa:4339082;	PF02535;
3534	LOC_Os04g29770	2.14389	3.13417	3.2342	0.00682708	0.0248552	wall-associated receptor kinase-like 3 precursor, putative, expressed	NA	NA			A0A0P0W950	A0A0P0W950_ORYSJ	unreviewed	Os04g0366800 protein	Os04g0366800 OSNPB_040366800	plasma membrane [GO:0005886]; ATP binding [GO:0005524]; protein serine/threonine kinase activity [GO:0004674]; cell surface receptor signaling pathway [GO:0007166]; protein phosphorylation [GO:0006468]			PF07714;
2401	LOC_Os03g09020	49.3011	3.13315	0.452302	3.89e-13	9.67e-12	dehydrogenase, putative, expressed	Os03g0189600				Q8H7N0	Q8H7N0_ORYSJ	unreviewed	Putative alcohol dehydrogenase	OJ1217B09.16	oxidoreductase activity [GO:0016491]; zinc ion binding [GO:0008270]			PF08240;
6421	LOC_Os08g26120	12.7446	3.12584	0.756005	4.46e-06	3.84e-05	expressed protein	Os08g0349300				Q0J690	Q0J690_ORYSJ	unreviewed	Os08g0349300 protein (cDNA clone:001-101-A11, full insert sequence)	Os08g0349300 OSNPB_080349300			osa:4345349;
3063	LOC_Os03g51459	129.771	3.12382	0.316623	5.23e-24	4.39e-22	expressed protein	Os03g0724500				A0A0P0W2D1	A0A0P0W2D1_ORYSJ	unreviewed	Os03g0724500 protein (Fragment)	Os03g0724500 OSNPB_030724500
579	LOC_Os01g43710	484.959	3.12141	0.269929	5e-32	8.88e-30	cytochrome P450 72A1, putative, expressed	Os01g0627500	OsCYP72A18			B9EY59	B9EY59_ORYSJ	unreviewed	Cytochrome P450-like (Os01g0627500 protein)	Os01g0627500 OsJ_02679 P0006C01.34 P0688A04.12	heme binding [GO:0020037]; iron ion binding [GO:0005506]; monooxygenase activity [GO:0004497]; oxidoreductase activity, acting on paired donors, with incorporation or reduction of molecular oxygen [GO:0016705]		osa:4326657;	PF00067;
6265	LOC_Os08g06280	337.2	3.12056	0.232174	3.11e-42	1.08e-39	LSD1 zinc finger domain containing protein, expressed	Os08g0159500	OsLSD1, OsLOL1, OsLSD1.1, LSD1.1, LSD1			Q0J7V9	LSD1_ORYSJ	reviewed	Protein LSD1 (Protein LESION SIMULATING DISEASE 1) (OsLSD1) (Putative zinc finger LSD1)	LSD1 Os08g0159500 LOC_Os08g06280 OsJ_26122	nucleus [GO:0005634]; cell differentiation [GO:0030154]; negative regulation of defense response [GO:0031348]; negative regulation of plant-type hypersensitive response [GO:0034051]; plant-type hypersensitive response [GO:0009626]; regulation of cell differentiation [GO:0045595]	SUBCELLULAR LOCATION: Nucleus {ECO:0000269|PubMed:15915636}.	osa:4344713;	PF06943;
3491	LOC_Os04g19670	2.13251	3.11896	3.24154	0.00690603	0.0251088	retrotransposon protein, putative, Ty3-gypsy subclass, expressed	NA	NA			Q6EN47	Q6EN47_ORYSJ	unreviewed	Uncharacterized protein OSJNBa0052K15.10	OSJNBa0052K15.10
3441	LOC_Os04g10000	35.7169	3.11861	0.536117	4.9e-10	8.04e-09	sex determination protein tasselseed-2, putative, expressed	Os04g0179100	OsSDR110C-MS2, SDR110C-MS2, OsMAS1, MAS1			A3ARJ6	A3ARJ6_ORYSJ	unreviewed	OSJNBa0052P16.8 protein (OSJNBa0096F01.22 protein) (Os04g0179100 protein)	Os04g0179100 OsJ_13989 OSJNBa0052P16.8 OSJNBa0096F01.22	oxidoreductase activity [GO:0016491]
7843	LOC_Os11g08210	993.908	3.10881	0.177008	3.88e-70	5.9e-67	no apical meristem protein, putative, expressed	Os11g0184900	OsNAC5, NAC71, ONAC071, ONAC009, ONAC9, ONAC020, ONAC20, OnNAC5*, OnNAC5, OsNAC5/ONAC009			Q53NF7	NAC71_ORYSJ	reviewed	NAC domain-containing protein 71 (ONAC071) (OsNAC5)	NAC071 NAC5 Os11g0184900 LOC_Os11g08210	nucleus [GO:0005634]; DNA binding [GO:0003677]; positive regulation of response to salt stress [GO:1901002]; positive regulation of transcription, DNA-templated [GO:0045893]	SUBCELLULAR LOCATION: Nucleus {ECO:0000255|PROSITE-ProRule:PRU00353, ECO:0000269|PubMed:20632034}.	osa:4349963;	PF02365;
5120	LOC_Os06g14180	15.0853	3.10594	0.814056	1.21e-05	9.49e-05	expressed protein	NA	NA			A0A0P0WUP1	A0A0P0WUP1_ORYSJ	unreviewed	Os06g0252100 protein	Os06g0252100 OSNPB_060252100
1078	LOC_Os01g66900	2.12241	3.10475	3.24823	0.00697866	0.0253312	expressed protein	Os01g0893700				Q5JLW0	Q5JLW0_ORYSJ	unreviewed	Membrane protein-like	B1078G07.36			osa:4324959;
1889	LOC_Os02g45160	78.2252	3.10043	0.305982	4.87e-25	4.52e-23	aluminum-activated malate transporter, putative, expressed	Os02g0673100	OsALMT7, ALMT7			Q6EPG5	Q6EPG5_ORYSJ	unreviewed	cDNA clone:002-153-D05, full insert sequence		integral component of membrane [GO:0016021]; malate transport [GO:0015743]		osa:4330288;	PF11744;
8371	LOC_Os12g11620	5.61463	3.09724	1.40335	0.00247976	0.0105945	expressed protein	Os12g0218100				Q2QVU4	Q2QVU4_ORYSJ	unreviewed	Os12g0218100 protein (cDNA clone:001-112-B09, full insert sequence)	LOC_Os12g11620 Os12g0218100 OSNPB_120218100
3083	LOC_Os03g52180	78.8191	3.09288	0.404381	1.75e-15	6.08e-14	4-hydroxy-3-methylbut-2-enyl diphosphate reductase, putative, expressed	Os03g0732000	OsHDR2			A0A0P0W2M8	A0A0P0W2M8_ORYSJ	unreviewed	Os03g0732000 protein	Os03g0732000	4-hydroxy-3-methylbut-2-en-1-yl diphosphate reductase activity [GO:0051745]; metal ion binding [GO:0046872]; dimethylallyl diphosphate biosynthetic process [GO:0050992]; isopentenyl diphosphate biosynthetic process, methylerythritol 4-phosphate pathway [GO:0019288]			PF02401;
5531	LOC_Os06g50080	317.441	3.08755	0.279395	2.03e-29	2.73e-27	DUF581 domain containing protein, expressed	Os06g0714800				A0A0P0X0W3	A0A0P0X0W3_ORYSJ	unreviewed	Os06g0714800 protein	Os06g0714800			osa:4342065;	PF04570;
3487	LOC_Os04g17660	30.8881	3.08706	0.547871	1.79e-09	2.7e-08	rhodanese-like domain containing protein, putative, expressed	Os04g0249600	OsStr6, OsRhST, RLD, OsHAC1;2, HAC1;2			Q0JEL3	Q0JEL3_ORYSJ	unreviewed	Os04g0249600 protein (Fragment)	Os04g0249600 OSNPB_040249600				PF00581;
3488	LOC_Os04g17660	30.8881	3.08706	0.547871	1.79e-09	2.7e-08	rhodanese-like domain containing protein, putative, expressed	Os04g0249600	OsStr6, OsRhST, RLD, OsHAC1;2, HAC1;2			A0A0P0W7L6	A0A0P0W7L6_ORYSJ	unreviewed	Uncharacterized protein	OsJ_14035				PF00581;
1755	LOC_Os02g38010	11.2733	3.08528	0.823545	1.98e-05	0.000148984	copper methylamine oxidase precursor, putative, expressed	NA	NA			A3AUU3	A3AUU3_ORYSJ	unreviewed	Amine oxidase (EC 1.4.3.-)	OsJ_15179	copper ion binding [GO:0005507]; primary amine oxidase activity [GO:0008131]; quinone binding [GO:0048038]; amine metabolic process [GO:0009308]			PF01179;PF02728;
7230	LOC_Os10g09110	27.343	3.07891	0.523041	4.6e-10	7.57e-09	cytochrome P450, putative, expressed	Os10g0171500				Q33AN0	Q33AN0_ORYSJ	unreviewed	Cytochrome P450 family protein, expressed (Os10g0171500 protein) (cDNA clone:J033052E03, full insert sequence)	LOC_Os10g09110 Os10g0171500 OSNPB_100171500	heme binding [GO:0020037]; iron ion binding [GO:0005506]; oxidoreductase activity, acting on paired donors, with incorporation or reduction of molecular oxygen [GO:0016705]			PF00067;
7231	LOC_Os10g09110	27.343	3.07891	0.523041	4.6e-10	7.57e-09	cytochrome P450, putative, expressed	Os10g0171500				A0A0P0XS64	A0A0P0XS64_ORYSJ	unreviewed	Putative cytochrome P450	OSJNBa0061H20.1	membrane [GO:0016020]; heme binding [GO:0020037]; iron ion binding [GO:0005506]; oxidoreductase activity, acting on paired donors, with incorporation or reduction of molecular oxygen, NAD(P)H as one donor, and incorporation of one atom of oxygen [GO:0016709]		osa:9269224;	PF00067;
7113	LOC_Os09g37330	45.7363	3.07875	0.448319	6.46e-13	1.55e-11	OsSAUR39 - Auxin-responsive SAUR gene family member, expressed	Os09g0545300	OsSAUR39			B7F8P5	SAU39_ORYSJ	reviewed	Auxin-responsive protein SAUR36 (Protein SMALL AUXIN UP RNA 36)	SAUR39 Os09g0545300 LOC_Os09g37330	cytoplasm [GO:0005737]; auxin-activated signaling pathway [GO:0009734]; multicellular organism development [GO:0007275]; negative regulation of organ growth [GO:0046621]; regulation of auxin polar transport [GO:2000012]	SUBCELLULAR LOCATION: Cytoplasm {ECO:0000269|PubMed:19700562}.	osa:9271092;	PF02519;
7749	LOC_Os11g03820	107.09	3.07564	0.337425	8.17e-21	4.93e-19	D-mannose binding lectin family protein, expressed	Os11g0133001				Q2RAY8	Q2RAY8_ORYSJ	unreviewed	D-mannose binding lectin family protein, expressed	LOC_Os11g03820	integral component of membrane [GO:0016021]; ATP binding [GO:0005524]; carbohydrate binding [GO:0030246]; protein kinase activity [GO:0004672]; recognition of pollen [GO:0048544]			PF01453;PF00069;PF11955;PF00954;
1772	LOC_Os02g38920	16578.7	3.07451	0.22201	1.12e-44	4.38e-42	glyceraldehyde-3-phosphate dehydrogenase, putative, expressed	Os02g0601300	OsGapC1			A0A2H4N016	A0A2H4N016_ORYSJ	unreviewed	Glyceraldehyde-3-phosphate dehydrogenase (EC 1.2.1.-)		NAD binding [GO:0051287]; NADP binding [GO:0050661]; oxidoreductase activity, acting on the aldehyde or oxo group of donors, NAD or NADP as acceptor [GO:0016620]; glucose metabolic process [GO:0006006]		osa:4329892;	PF02800;PF00044;
5614	LOC_Os07g03830	35.159	3.06821	0.487458	3.03e-11	5.91e-10	lectin-like receptor kinase, putative, expressed	NA	NA			Q6YT55	Q6YT55_ORYSJ	unreviewed	Os07g0130300 protein (Putative receptor kinase Lecrk)	Os07g0130300 OsJ_22968 OSJNBa0088O14.30	integral component of membrane [GO:0016021]; ATP binding [GO:0005524]; carbohydrate binding [GO:0030246]; protein kinase activity [GO:0004672]			PF00139;PF00069;
5772	LOC_Os07g22930	54.1986	3.06543	0.597001	2.2e-08	2.78e-07	starch synthase, putative, expressed	NA	NA			Q0D709	Q0D709_ORYSJ	unreviewed	Granule binding starch synthase II (Os07g0412100 protein)	P0710F09.134 Os07g0412100 OsJ_23947	amyloplast [GO:0009501]; chloroplast [GO:0009507]; glycogen (starch) synthase activity [GO:0004373]; starch biosynthetic process [GO:0019252]		osa:4343010;	PF08323;PF00534;
2419	LOC_Os03g10100	53.3899	3.06367	0.461982	3e-12	6.7e-11	transporter family protein, putative, expressed	Os03g0197200				B9F5Q0	B9F5Q0_ORYSJ	unreviewed	MFS domain-containing protein	OsJ_09775	integral component of membrane [GO:0016021]; transmembrane transporter activity [GO:0022857]		osa:4331946;	PF00083;
746	LOC_Os01g52330	51.6251	3.06237	0.377768	6.46e-17	2.61e-15	NB-ARC domain containing protein, expressed	Os01g0721300				Q5JMA9	Q5JMA9_ORYSJ	unreviewed	Os01g0721300 protein	Os01g0721300 OSNPB_010721300	ADP binding [GO:0043531]			PF00931;PF18052;
348	LOC_Os01g19390	68.0389	3.05623	0.340727	3.15e-20	1.81e-18	glycerol-3-phosphate acyltransferase, putative, expressed	Os01g0299300	GPAT			Q0JNF2	Q0JNF2_ORYSJ	unreviewed	Os01g0299300 protein	Os01g0299300	integral component of membrane [GO:0016021]; transferase activity, transferring acyl groups [GO:0016746]			PF01553;
221	LOC_Os01g11054	404.533	3.05438	0.234457	7.51e-40	2.26e-37	phosphoenolpyruvate carboxylase, putative, expressed	Os01g0208700	PEPC-2, Osppc4, ppc4			Q5QNA5	Q5QNA5_ORYSJ	unreviewed	Os01g0208700 protein (cDNA clone:J013071A07, full insert sequence)	Os01g0208700 OSNPB_010208700	apoplast [GO:0048046]; chloroplast [GO:0009507]; cytosol [GO:0005829]; phosphoenolpyruvate carboxylase activity [GO:0008964]; carbon fixation [GO:0015977]; leaf development [GO:0048366]; tricarboxylic acid cycle [GO:0006099]		osa:4325531;	PF00311;
3689	LOC_Os04g39180	5.21852	3.05297	1.39395	0.00294376	0.0122562	nodulation receptor kinase precursor, putative, expressed	Os04g0465900	OsKIN6			Q7XUY3	Q7XUY3_ORYSJ	unreviewed	OSJNBb0048E02.15 protein (Os04g0465900 protein)	Os04g0465900 OsJ_15106 OSJNBb0048E02.15	integral component of membrane [GO:0016021]; ATP binding [GO:0005524]; protein kinase activity [GO:0004672]			PF00069;
5252	LOC_Os06g34280	3.53604	3.05267	1.70583	0.00397236	0.0158185	expressed protein	Os06g0533700				A8R3R0	A8R3R0_ORYSJ	unreviewed	CLE family OsCLE602 protein (Os06g0533700 protein)	OsCLE602 Os06g0533700 OSNPB_060533700
5958	LOC_Os07g38800	39.3634	3.0394	0.436864	4.33e-13	1.07e-11	lectin-like receptor kinase, putative, expressed	Os07g0575600				Q8LIP2	Q8LIP2_ORYSJ	unreviewed	Os07g0575600 protein	Os07g0575600 OSNPB_070575600	integral component of membrane [GO:0016021]; plasma membrane [GO:0005886]; ATP binding [GO:0005524]; carbohydrate binding [GO:0030246]; transmembrane receptor protein serine/threonine kinase activity [GO:0004675]; defense response [GO:0006952]; defense response to bacterium [GO:0042742]; defense response to oomycetes [GO:0002229]		osa:4343698;	PF00139;PF00069;
3496	LOC_Os04g20630	2.78779	3.03321	4.58727	0.00787223	0.0280064	nucleic acid binding protein, putative	NA	NA			Q7XWX0	Q7XWX0_ORYSJ	unreviewed	OSJNBb0058J09.9 protein	OSJNBb0058J09.9
5308	LOC_Os06g38980	7.88329	3.03144	1.00563	0.000294765	0.00164845	polyadenylate-binding protein, putative, expressed	Os06g0589700				Q69X94	Q69X94_ORYSJ	unreviewed	Polyadenylate-binding protein (PABP)	P0633E08.11	cytoplasm [GO:0005737]; RNA binding [GO:0003723]	SUBCELLULAR LOCATION: Cytoplasm {ECO:0000256|RuleBase:RU362004}.	osa:4341408;	PF00658;PF00076;
5042	LOC_Os06g09190	9.42011	3.03081	0.885302	6.92e-05	0.000455461	mitogen-activated protein kinase kinase 5, putative, expressed	Os06g0191500	OsMPKK5			Q0DDY0	Q0DDY0_ORYSJ	unreviewed	Os06g0191500 protein (Fragment)	Os06g0191500	ATP binding [GO:0005524]; protein kinase activity [GO:0004672]			PF00069;
4748	LOC_Os05g44922	1356.1	3.02635	0.241751	5.04e-37	1.2e-34	6-phosphofructokinase, putative, expressed	Os05g0524400	OsPFK05, PFK05, PFK5, OsPFK5			A0A0N7KL42	A0A0N7KL42_ORYSJ	unreviewed	Os05g0524400 protein (Putative diphosphate-fructose-6-phosphate 1-phosphotransferase)	Os05g0524400 OJ1593_C11.1 OSJNBa0075A10.18	cytoplasm [GO:0005737]; 6-phosphofructokinase activity [GO:0003872]; ATP binding [GO:0005524]; metal ion binding [GO:0046872]; fructose 6-phosphate metabolic process [GO:0006002]		osa:4339369;	PF00365;
6413	LOC_Os08g25430	37.75	3.019	0.429528	2.46e-13	6.25e-12	cysteine-rich receptor-like protein kinase 35 precursor, putative, expressed	Os08g0343000	OsRLCK251			Q0J6A8	Q0J6A8_ORYSJ	unreviewed	Os08g0343000 protein	Os08g0343000 OSNPB_080343000	plasma membrane [GO:0005886]; ATP binding [GO:0005524]; protein serine/threonine kinase activity [GO:0004674]; cell surface receptor signaling pathway [GO:0007166]; protein phosphorylation [GO:0006468]		osa:4345329;	PF00069;
3509	LOC_Os04g24220	58.7428	3.01881	0.440724	7.09e-13	1.7e-11	OsWAK32 - OsWAK receptor-like protein kinase, expressed	Os04g0307500	OsWAK32			Q0JEA1	Q0JEA1_ORYSJ	unreviewed	Os04g0307500 protein	Os04g0307500	integral component of membrane [GO:0016021]; ATP binding [GO:0005524]; calcium ion binding [GO:0005509]; protein kinase activity [GO:0004672]			PF00069;
3510	LOC_Os04g24220	58.7428	3.01881	0.440724	7.09e-13	1.7e-11	OsWAK32 - OsWAK receptor-like protein kinase, expressed	Os04g0307500	OsWAK32			Q7F9G2	Q7F9G2_ORYSJ	unreviewed	OSJNBa0024J22.5 protein	OSJNBa0024J22.5	integral component of membrane [GO:0016021]; ATP binding [GO:0005524]; calcium ion binding [GO:0005509]; polysaccharide binding [GO:0030247]; protein kinase activity [GO:0004672]			PF13947;PF00069;
7161	LOC_Os10g01134	94.1728	3.01366	0.301214	1.66e-24	1.47e-22	OsSCP46 - Putative Serine Carboxypeptidase homologue, expressed	Os10g0101200	OsSCP45, OsSCP46, SCP46			Q8W3C6	Q8W3C6_ORYSJ	unreviewed	Putative acyltransferase (Putative serine carboxypeptidase)	OJ1136E01.6 OSJNBa0046L02.9	serine-type carboxypeptidase activity [GO:0004185]; transferase activity, transferring acyl groups [GO:0016746]			PF00450;
7162	LOC_Os10g01134	94.1728	3.01366	0.301214	1.66e-24	1.47e-22	OsSCP46 - Putative Serine Carboxypeptidase homologue, expressed	Os10g0101200	OsSCP45, OsSCP46, SCP46			Q0IZD5	Q0IZD5_ORYSJ	unreviewed	Os10g0101200 protein	Os10g0101200	serine-type carboxypeptidase activity [GO:0004185]; transferase activity, transferring acyl groups other than amino-acyl groups [GO:0016747]; secondary metabolic process [GO:0019748]		osa:4347942;	PF00450;
3426	LOC_Os04g06590	35.7026	3.00709	0.49124	8.52e-11	1.57e-09	expressed protein	Os04g0150300				A3AQN5	A3AQN5_ORYSJ	unreviewed	DUF4220 domain-containing protein	OsJ_13691	integral component of membrane [GO:0016021]		osa:4335022;	PF13968;PF04578;
8400	LOC_Os12g15780	2.17674	3.00236	3.45727	0.00760789	0.0272453	retrotransposon protein, putative, unclassified, expressed	NA	NA			Q2QUM2	Q2QUM2_ORYSJ	unreviewed	Retrotransposon protein, putative, unclassified	LOC_Os12g15780	aspartic-type endopeptidase activity [GO:0004190]; nucleic acid binding [GO:0003676]; DNA integration [GO:0015074]			PF17921;PF03732;PF17919;PF00665;PF00078;
2575	LOC_Os03g16260	3.81752	2.99977	1.81722	0.00436175	0.0171336	protein kinase, putative, expressed	Os03g0269300				Q0DT46	Q0DT46_ORYSJ	unreviewed	Os03g0269300 protein	Os03g0269300	integral component of membrane [GO:0016021]; plasma membrane [GO:0005886]; ATP binding [GO:0005524]; transmembrane receptor protein serine/threonine kinase activity [GO:0004675]; protein phosphorylation [GO:0006468]		osa:4332378;	PF00069;
6326	LOC_Os08g10630	198.967	2.99585	0.250193	5.49e-34	1.08e-31	metal cation transporter, putative, expressed	Os08g0207500	OsZIP4			Q6ZJ91	ZIP4_ORYSJ	reviewed	Zinc transporter 4 (ZRT/IRT-like protein 4) (OsZIP4)	ZIP4 Os08g0207500 LOC_Os08g10630 OJ1734_E04.11	integral component of membrane [GO:0016021]; membrane [GO:0016020]; plasma membrane [GO:0005886]; zinc ion transmembrane transporter activity [GO:0005385]; zinc ion transmembrane transport [GO:0071577]; zinc ion transport [GO:0006829]	SUBCELLULAR LOCATION: Cell membrane {ECO:0000269|PubMed:16263903}; Multi-pass membrane protein {ECO:0000269|PubMed:16263903}.	osa:4344937;	PF02535;
514	LOC_Os01g39136	72.3771	2.99003	0.404313	1.26e-14	3.85e-13	retrotransposon protein, putative, unclassified, expressed	NA	NA			C7IXU0	C7IXU0_ORYSJ	unreviewed	Os01g0573200 protein	Os01g0573200
4309	LOC_Os05g07450	12.4799	2.98757	0.805065	1.96e-05	0.000147273	S-domain receptor-like protein kinase, putative, expressed	Os05g0166600				Q60D68	Q60D68_ORYSJ	unreviewed	Receptor-like serine/threonine-protein kinase (EC 2.7.11.1)	Os05g0166600 OSNPB_050166600	integral component of membrane [GO:0016021]; ATP binding [GO:0005524]; protein serine/threonine kinase activity [GO:0004674]; recognition of pollen [GO:0048544]		osa:4337919;	PF01453;PF08276;PF00069;PF00954;
2484	LOC_Os03g12510	4591.92	2.9842	0.236472	1.21e-37	3.13e-35	non-symbiotic hemoglobin 2, putative, expressed	Os03g0226200	HB2, OsHB2, OsNSHB2, hb2, GLB1b, ORYsa GLB1b, OsPgb1.2, Pgb1.2			O04985	HBL2_ORYSJ	reviewed	Non-symbiotic hemoglobin 2 (ORYsa GLB1b) (rHb2)	HB2 GLB1B Os03g0226200 LOC_Os03g12510 OsJ_09991 OSJNBa0081P02.19	heme binding [GO:0020037]; metal ion binding [GO:0046872]; oxygen binding [GO:0019825]		osa:4332123;	PF00042;
4867	LOC_Os05g50815	11.7349	2.98058	0.757672	1.03e-05	8.28e-05	expressed protein	NA	NA			Q0DFK3	Q0DFK3_ORYSJ	unreviewed	Os05g0585600 protein	Os05g0585600	integral component of membrane [GO:0016021]		osa:4339752;
7980	LOC_Os11g28530	558.419	2.97883	0.324988	4.16e-21	2.6e-19	terpene synthase, putative, expressed	Os11g0474900				Q6BDZ9	KSL8_ORYSJ	reviewed	Stemar-13-ene synthase (EC 4.2.3.33) (Diterpene cyclase 2) (OsDTC2) (Ent-kaurene synthase-like 8) (OsKSL8) (Stemarene synthase)	KSL8 DTC2 Os11g0474800 LOC_Os11g28530	magnesium ion binding [GO:0000287]; stemar-13-ene synthase activity [GO:0034278]; terpene synthase activity [GO:0010333]; defense response [GO:0006952]; diterpenoid biosynthetic process [GO:0016102]		osa:4350502;	PF01397;PF03936;
7981	LOC_Os11g28530	558.419	2.97883	0.324988	4.16e-21	2.6e-19	terpene synthase, putative, expressed	Os11g0474900				H2KW59	H2KW59_ORYSJ	unreviewed	Terpene synthase family, metal binding domain containing protein, expressed	LOC_Os11g28530	magnesium ion binding [GO:0000287]; terpene synthase activity [GO:0010333]			PF01397;PF03936;
7982	LOC_Os11g28530	558.419	2.97883	0.324988	4.16e-21	2.6e-19	terpene synthase, putative, expressed	Os11g0475000				H2KW59	H2KW59_ORYSJ	unreviewed	Terpene synthase family, metal binding domain containing protein, expressed	LOC_Os11g28530	magnesium ion binding [GO:0000287]; terpene synthase activity [GO:0010333]			PF01397;PF03936;
7983	LOC_Os11g28530	558.419	2.97883	0.324988	4.16e-21	2.6e-19	terpene synthase, putative, expressed	Os11g0474800	OsKS8, KS8, KSL8, OsKSL8, DTC2, OsDTC2, OsDTC2/OsKS8, OsTPS32			H2KW59	H2KW59_ORYSJ	unreviewed	Terpene synthase family, metal binding domain containing protein, expressed	LOC_Os11g28530	magnesium ion binding [GO:0000287]; terpene synthase activity [GO:0010333]			PF01397;PF03936;
7984	LOC_Os11g28530	558.419	2.97883	0.324988	4.16e-21	2.6e-19	terpene synthase, putative, expressed	Os11g0474800	OsKS8, KS8, KSL8, OsKSL8, DTC2, OsDTC2, OsDTC2/OsKS8, OsTPS32			Q6BDZ9	KSL8_ORYSJ	reviewed	Stemar-13-ene synthase (EC 4.2.3.33) (Diterpene cyclase 2) (OsDTC2) (Ent-kaurene synthase-like 8) (OsKSL8) (Stemarene synthase)	KSL8 DTC2 Os11g0474800 LOC_Os11g28530	magnesium ion binding [GO:0000287]; stemar-13-ene synthase activity [GO:0034278]; terpene synthase activity [GO:0010333]; defense response [GO:0006952]; diterpenoid biosynthetic process [GO:0016102]		osa:4350502;	PF01397;PF03936;
7985	LOC_Os11g28530	558.419	2.97883	0.324988	4.16e-21	2.6e-19	terpene synthase, putative, expressed	Os11g0475000				Q6BDZ9	KSL8_ORYSJ	reviewed	Stemar-13-ene synthase (EC 4.2.3.33) (Diterpene cyclase 2) (OsDTC2) (Ent-kaurene synthase-like 8) (OsKSL8) (Stemarene synthase)	KSL8 DTC2 Os11g0474800 LOC_Os11g28530	magnesium ion binding [GO:0000287]; stemar-13-ene synthase activity [GO:0034278]; terpene synthase activity [GO:0010333]; defense response [GO:0006952]; diterpenoid biosynthetic process [GO:0016102]		osa:4350502;	PF01397;PF03936;
6435	LOC_Os08g28560	63.5582	2.97382	0.344758	6.51e-19	3.3e-17	expressed protein	Os08g0372900				Q6ZD18	Q6ZD18_ORYSJ	unreviewed	Os08g0372900 protein (cDNA clone:J033112H01, full insert sequence)	Os08g0372900 OSNPB_080372900			osa:4345408;
6804	LOC_Os09g12650	19.9526	2.97125	0.575611	3.03e-08	3.75e-07	pyrophosphate--fructose 6-phosphate 1-phosphotransferase subunit alpha, putative, expressed	Os09g0298100	OsPFPA4, OsPFP1a4, PFP1a4			R9TFH5	R9TFH5_ORYSJ	unreviewed	Pyrophosphate--fructose 6-phosphate 1-phosphotransferase subunit alpha (PFP) (6-phosphofructokinase, pyrophosphate dependent) (PPi-PFK) (Pyrophosphate-dependent 6-phosphofructose-1-kinase)	PFPA4 PFP-ALPHA LOC_Os09g12650.2	cytoplasm [GO:0005737]; 6-phosphofructokinase activity [GO:0003872]; ATP binding [GO:0005524]; diphosphate-fructose-6-phosphate 1-phosphotransferase activity [GO:0047334]; metal ion binding [GO:0046872]	SUBCELLULAR LOCATION: Cytoplasm {ECO:0000256|HAMAP-Rule:MF_03185}.	osa:9271821;	PF00365;
439	LOC_Os01g31420	2.41162	2.96723	3.92076	0.00798177	0.028334	retrotransposon protein, putative, Ty3-gypsy subclass, expressed	NA	NA			Q2QT03	Q2QT03_ORYSJ	unreviewed	Retrotransposon protein, putative, unclassified	LOC_Os12g22320	nucleic acid binding [GO:0003676]; RNA-DNA hybrid ribonuclease activity [GO:0004523]; DNA integration [GO:0015074]			PF17921;PF03732;PF00665;PF00078;PF13456;
4918	LOC_Os06g02360	11.7033	2.96704	0.762222	1.19e-05	9.39e-05	Skp1 family, dimerisation domain containing protein, expressed	Os06g0113800	OSK10			Q0DF60	Q0DF60_ORYSJ	unreviewed	Os06g0113800 protein (Putative SKP1)	Os06g0113800 OsJ_19880 P0541H01.17	cytoplasm [GO:0005737]; nucleus [GO:0005634]; cullin family protein binding [GO:0097602]; protein ubiquitination [GO:0016567]; SCF-dependent proteasomal ubiquitin-dependent protein catabolic process [GO:0031146]			PF01466;PF03931;
7289	LOC_Os10g21630	20.085	2.96688	0.567731	2.05e-08	2.6e-07	hypothetical protein	NA	NA			Q339F7	Q339F7_ORYSJ	unreviewed	Expressed protein	LOC_Os10g21630
8402	LOC_Os12g16080	8.98419	2.96574	0.902916	0.000116843	0.000723082	expressed protein	Os12g0261300				Q2QUJ1	Q2QUJ1_ORYSJ	unreviewed	Expressed protein	LOC_Os12g16090	integral component of membrane [GO:0016021]
4036	LOC_Os04g54240	45.6704	2.95935	0.433281	7.98e-13	1.9e-11	wound induced protein, putative, expressed	Os04g0635100				Q7XQS8	Q7XQS8_ORYSJ	unreviewed	Os04g0635100 protein	Os04g0635100 OSNPB_040635100			osa:107280826;osa:4337130;	PF12609;
5311	LOC_Os06g39120	294.969	2.95526	0.720504	2.72e-06	2.45e-05	expressed protein	Os06g0591400				B7E5V1	B7E5V1_ORYSJ	unreviewed	cDNA clone:006-207-H06, full insert sequence
7998	LOC_Os11g29710	60.4669	2.95282	0.340316	5.18e-19	2.66e-17	OsFBO4 - F-box and other domain containing protein, expressed	Os11g0488900	OsFbox600, Os_F0472			Q2R448	Q2R448_ORYSJ	unreviewed	MYND finger family protein, expressed (Os11g0488900 protein)	LOC_Os11g29710 Os11g0488900 OSNPB_110488900				PF12937;PF01753;
5442	LOC_Os06g46730	4.70883	2.95249	1.30314	0.00287934	0.0120312	expressed protein	Os06g0681100				Q653Y1	Q653Y1_ORYSJ	unreviewed	DUF629 domain-containing protein	OsJ_22380 P0547F09.12				PF04780;
8488	LOC_Os12g30180	14.3875	2.94885	0.702716	3.12e-06	2.77e-05	protein kinase domain containing protein, expressed	Os12g0486900	OsRLCK369			Q2QQQ9	Q2QQQ9_ORYSJ	unreviewed	Protein kinase domain containing protein, expressed	LOC_Os12g30180	ATP binding [GO:0005524]; protein kinase activity [GO:0004672]			PF00069;PF14299;
8343	LOC_Os12g08850	27.1512	2.94851	0.520234	1.49e-09	2.26e-08	expressed protein	Os12g0190400				Q2QWM4	Q2QWM4_ORYSJ	unreviewed	Phage head-tail adaptor family protein, expressed	LOC_Os12g08850	catalytic activity [GO:0003824]			PF00266;
3068	LOC_Os03g51495	11.6818	2.94738	0.759884	1.22e-05	9.58e-05	expressed protein	NA	NA			Q75GV7	Q75GV7_ORYSJ	unreviewed	Os03g0724900 protein	Os03g0724900 OJ1499_D04.2				PF07762;
1336	LOC_Os02g05610	20.1015	2.94637	0.6059	1.25e-07	1.42e-06	ZOS2-03 - C2H2 zinc finger protein, expressed	Os02g0149600				Q6Z422	Q6Z422_ORYSJ	unreviewed	Os02g0149600 protein	Os02g0149600 OSNPB_020149600	nucleic acid binding [GO:0003676]; mRNA processing [GO:0006397]		osa:4328304;	PF04959;PF12066;
5310	LOC_Os06g39110	194.477	2.9398	0.361333	3.31e-17	1.38e-15	expressed protein	Os06g0591200				Q0DB89	Q0DB89_ORYSJ	unreviewed	Os06g0591200 protein	Os06g0591200 OsJ_21843 P0502H06.6 P0633E08.36			osa:4341416;
2619	LOC_Os03g18130	6516.3	2.92966	0.191174	4.35e-54	2.79e-51	asparagine synthetase, putative, expressed	Os03g0291500	OsASN1, OsAS1, AS1			Q10MX3	ASNS1_ORYSJ	reviewed	Asparagine synthetase [glutamine-hydrolyzing] 1 (EC 6.3.5.4) (Glutamine-dependent asparagine synthetase 1)	Os03g0291500 LOC_Os03g18130	cytosol [GO:0005829]; asparagine synthase (glutamine-hydrolyzing) activity [GO:0004066]; ATP binding [GO:0005524]; asparagine biosynthetic process [GO:0006529]; glutamine metabolic process [GO:0006541]; L-asparagine biosynthetic process [GO:0070981]		osa:4332506;	PF00733;PF13537;
8463	LOC_Os12g25630	291.629	2.92558	0.211013	9.91e-45	3.95e-42	sulfite oxidase, putative, expressed	Os12g0442800				Q0INJ4	Q0INJ4_ORYSJ	unreviewed	Os12g0442800 protein	Os12g0442800	mitochondrion [GO:0005739]; heme binding [GO:0020037]; molybdenum ion binding [GO:0030151]; molybdopterin cofactor binding [GO:0043546]; sulfite oxidase activity [GO:0008482]; nitrate assimilation [GO:0042128]; sulfur compound metabolic process [GO:0006790]		osa:4352143;	PF03404;PF00174;
5601	LOC_Os07g03030	21.02	2.92099	0.583218	6.14e-08	7.27e-07	expressed protein	Os07g0121800				B9FVA1	B9FVA1_ORYSJ	unreviewed	Uncharacterized protein	OsJ_22927				PF08224;
519	LOC_Os01g39990	3.43104	2.91788	1.72964	0.0045431	0.0177258	expressed protein	Os01g0581800				A0A0P0V4J7	A0A0P0V4J7_ORYSJ	unreviewed	Os01g0581800 protein	Os01g0581800 OSNPB_010581800			osa:9270742;
6749	LOC_Os09g04430	6.02756	2.91738	1.10467	0.000964458	0.00466542	expressed protein	Os09g0130700				A0A0P0XK36	A0A0P0XK36_ORYSJ	unreviewed	Os09g0130700 protein	Os09g0130700 OSNPB_090130700	integral component of membrane [GO:0016021]		osa:107276123;
6361	LOC_Os08g15710	6.8226	2.91607	1.36048	0.00241665	0.0103576	DC1 domain, putative, expressed	Os08g0256700				Q0J6W6	Q0J6W6_ORYSJ	unreviewed	Os08g0256700 protein	Os08g0256700 OSJNBa0005L24.22			osa:4345101;
496	LOC_Os01g37630	17.1528	2.91479	0.680345	1.87e-06	1.74e-05	esterase, putative, expressed	Os01g0557100				Q8S0V0	Q8S0V0_ORYSJ	unreviewed	Os01g0557100 protein	Os01g0557100 OSNPB_010557100	hydrolase activity [GO:0016787]; methyl indole-3-acetate esterase activity [GO:0080030]; methyl jasmonate esterase activity [GO:0080032]; methyl salicylate esterase activity [GO:0080031]; jasmonic acid metabolic process [GO:0009694]; salicylic acid metabolic process [GO:0009696]		osa:4324570;	PF12697;
3470	LOC_Os04g13364	2.05672	2.91248	3.43823	0.00802822	0.0284809	transposon protein, putative, CACTA, En/Spm sub-class, expressed	Os04g0210700				Q7XN37	Q7XN37_ORYSJ	unreviewed	OSJNBa0083I11.7 protein (OSJNBb0022P19.11 protein)	OSJNBa0083I11.7 OSJNBb0022P19.11				PF13952;PF13960;PF13963;PF02992;
3471	LOC_Os04g13364	2.05672	2.91248	3.43823	0.00802822	0.0284809	transposon protein, putative, CACTA, En/Spm sub-class, expressed	Os04g0210800				Q7XN37	Q7XN37_ORYSJ	unreviewed	OSJNBa0083I11.7 protein (OSJNBb0022P19.11 protein)	OSJNBa0083I11.7 OSJNBb0022P19.11				PF13952;PF13960;PF13963;PF02992;
3472	LOC_Os04g13364	2.05672	2.91248	3.43823	0.00802822	0.0284809	transposon protein, putative, CACTA, En/Spm sub-class, expressed	Os04g0210250				Q7XN37	Q7XN37_ORYSJ	unreviewed	OSJNBa0083I11.7 protein (OSJNBb0022P19.11 protein)	OSJNBa0083I11.7 OSJNBb0022P19.11				PF13952;PF13960;PF13963;PF02992;
6422	LOC_Os08g26230	3.82812	2.90712	1.95865	0.00575357	0.0215732	expressed protein	NA	NA			A0A0N7KPQ3	A0A0N7KPQ3_ORYSJ	unreviewed	Os08g0351300 protein	Os08g0351300
7612	LOC_Os10g40934	249.023	2.90551	0.406512	7.65e-14	2.08e-12	flavonol synthase/flavanone 3-hydroxylase, putative, expressed	Os10g0558700	OsODD11, ODD11, 2-ODD11, Os2-ODD11, 2ODD11, Os2ODD11, M3H, OsM3H			Q8SB87	Q8SB87_ORYSJ	unreviewed	Putative ethylene-forming enzyme	OSJNBa0042H09.27 OsJ_32438	metal ion binding [GO:0046872]; oxidoreductase activity [GO:0016491]			PF03171;PF14226;
7613	LOC_Os10g40934	249.023	2.90551	0.406512	7.65e-14	2.08e-12	flavonol synthase/flavanone 3-hydroxylase, putative, expressed	Os10g0558750				C7J7C9	C7J7C9_ORYSJ	unreviewed	Os10g0558750 protein	Os10g0558750	metal ion binding [GO:0046872]; oxidoreductase activity [GO:0016491]			PF03171;PF14226;
7614	LOC_Os10g40934	249.023	2.90551	0.406512	7.65e-14	2.08e-12	flavonol synthase/flavanone 3-hydroxylase, putative, expressed	Os10g0558750				Q8SB87	Q8SB87_ORYSJ	unreviewed	Putative ethylene-forming enzyme	OSJNBa0042H09.27 OsJ_32438	metal ion binding [GO:0046872]; oxidoreductase activity [GO:0016491]			PF03171;PF14226;
7615	LOC_Os10g40934	249.023	2.90551	0.406512	7.65e-14	2.08e-12	flavonol synthase/flavanone 3-hydroxylase, putative, expressed	Os10g0558700	OsODD11, ODD11, 2-ODD11, Os2-ODD11, 2ODD11, Os2ODD11, M3H, OsM3H			C7J7C9	C7J7C9_ORYSJ	unreviewed	Os10g0558750 protein	Os10g0558750	metal ion binding [GO:0046872]; oxidoreductase activity [GO:0016491]			PF03171;PF14226;
7616	LOC_Os10g40934	249.023	2.90551	0.406512	7.65e-14	2.08e-12	flavonol synthase/flavanone 3-hydroxylase, putative, expressed	Os10g0558700	OsODD11, ODD11, 2-ODD11, Os2-ODD11, 2ODD11, Os2ODD11, M3H, OsM3H			Q108Z2	Q108Z2_ORYSJ	unreviewed	Oxidoreductase, 2OG-Fe oxygenase family protein, expressed	LOC_Os10g40934	oxidoreductase activity [GO:0016491]			PF03171;
7617	LOC_Os10g40934	249.023	2.90551	0.406512	7.65e-14	2.08e-12	flavonol synthase/flavanone 3-hydroxylase, putative, expressed	Os10g0558750				Q94LP4	Q94LP4_ORYSJ	unreviewed	(RAP Annotation release2) 2OG-Fe(II) oxygenase domain containing protein (Os10g0558700 protein) (Oxidoreductase, 2OG-Fe oxygenase family protein, expressed)	LOC_Os10g40934 Os10g0558700 OSNPB_100558700	dioxygenase activity [GO:0051213]; metal ion binding [GO:0046872]		osa:4349363;	PF03171;PF14226;
7618	LOC_Os10g40934	249.023	2.90551	0.406512	7.65e-14	2.08e-12	flavonol synthase/flavanone 3-hydroxylase, putative, expressed	Os10g0558700	OsODD11, ODD11, 2-ODD11, Os2-ODD11, 2ODD11, Os2ODD11, M3H, OsM3H			Q94LP4	Q94LP4_ORYSJ	unreviewed	(RAP Annotation release2) 2OG-Fe(II) oxygenase domain containing protein (Os10g0558700 protein) (Oxidoreductase, 2OG-Fe oxygenase family protein, expressed)	LOC_Os10g40934 Os10g0558700 OSNPB_100558700	dioxygenase activity [GO:0051213]; metal ion binding [GO:0046872]		osa:4349363;	PF03171;PF14226;
7619	LOC_Os10g40934	249.023	2.90551	0.406512	7.65e-14	2.08e-12	flavonol synthase/flavanone 3-hydroxylase, putative, expressed	Os10g0558700	OsODD11, ODD11, 2-ODD11, Os2-ODD11, 2ODD11, Os2ODD11, M3H, OsM3H			Q336T1	Q336T1_ORYSJ	unreviewed	Oxidoreductase, 2OG-Fe oxygenase family protein, expressed	LOC_Os10g40934	metal ion binding [GO:0046872]; oxidoreductase activity [GO:0016491]			PF03171;PF14226;
7620	LOC_Os10g40934	249.023	2.90551	0.406512	7.65e-14	2.08e-12	flavonol synthase/flavanone 3-hydroxylase, putative, expressed	Os10g0558750				Q336T1	Q336T1_ORYSJ	unreviewed	Oxidoreductase, 2OG-Fe oxygenase family protein, expressed	LOC_Os10g40934	metal ion binding [GO:0046872]; oxidoreductase activity [GO:0016491]			PF03171;PF14226;
7621	LOC_Os10g40934	249.023	2.90551	0.406512	7.65e-14	2.08e-12	flavonol synthase/flavanone 3-hydroxylase, putative, expressed	Os10g0558750				Q108Z2	Q108Z2_ORYSJ	unreviewed	Oxidoreductase, 2OG-Fe oxygenase family protein, expressed	LOC_Os10g40934	oxidoreductase activity [GO:0016491]			PF03171;
7842	LOC_Os11g08200	15.35	2.90437	0.687738	2.76e-06	2.48e-05	eukaryotic aspartyl protease domain containing protein, expressed	Os11g0184800	OsAsp1			B7F348	B7F348_ORYSJ	unreviewed	Aspartic proteinase (cDNA clone:002-171-F05, full insert sequence)		aspartic-type endopeptidase activity [GO:0004190]		osa:4349962;	PF14541;PF14543;
3084	LOC_Os03g52210	19.5099	2.9026	0.586235	8.16e-08	9.49e-07	retrotransposon protein, putative, Ty3-gypsy subclass, expressed	NA	NA			Q10DD9	Q10DD9_ORYSJ	unreviewed	Uncharacterized protein OSJNBa0079G12.14	OSJNBa0079G12.14	4-hydroxy-3-methylbut-2-en-1-yl diphosphate reductase activity [GO:0051745]; metal ion binding [GO:0046872]; dimethylallyl diphosphate biosynthetic process [GO:0050992]; isopentenyl diphosphate biosynthetic process, methylerythritol 4-phosphate pathway [GO:0019288]			PF06882;PF02401;
878	LOC_Os01g58280	51.3806	2.90201	0.39956	4.11e-14	1.17e-12	OsSub8 - Putative Subtilisin homologue, expressed	Os01g0795200	OsSub8, SUB8			A3AQF7	A3AQF7_ORYSJ	unreviewed	Uncharacterized protein	OsJ_13621	serine-type endopeptidase activity [GO:0004252]			PF17766;PF05922;PF00082;
7293	LOC_Os10g21950	25.7296	2.89365	0.494082	5.78e-10	9.36e-09	retrotransposon protein, putative, Ty1-copia subclass, expressed	NA	NA			Q7G3C9	Q7G3C9_ORYSJ	unreviewed	Retrotransposon protein, putative, Ty1-copia subclass	LOC_Os10g21950	ADP binding [GO:0043531]; nucleic acid binding [GO:0003676]; zinc ion binding [GO:0008270]; DNA integration [GO:0015074]			PF13976;PF00931;PF00665;PF07727;PF18052;
6672	LOC_Os08g43210	4.66861	2.89307	2.29664	0.00598009	0.0222409	AP2 domain containing protein, expressed	NA	NA			Q0J3Y6	DRE1I_ORYSJ	reviewed	Dehydration-responsive element-binding protein 1I (Protein DREB1I)	DREB1I ERF29 Os08g0545500 LOC_Os08g43210 OJ1323_A06.8 P0623F08.41	nucleus [GO:0005634]; DNA binding [GO:0003677]; DNA-binding transcription factor activity [GO:0003700]	SUBCELLULAR LOCATION: Nucleus {ECO:0000305}.	osa:4346220;	PF00847;
935	LOC_Os01g61070	117.706	2.89263	0.25817	4.47e-30	6.43e-28	heavy metal-associated domain containing protein, expressed	Os01g0826000	OsATX, OsHMP7, HMP7, OsHMP07			Q94D91	Q94D91_ORYSJ	unreviewed	Os01g0826000 protein	Os01g0826000 OSNPB_010826000	metal ion binding [GO:0046872]; metal ion transport [GO:0030001]		osa:4327517;	PF00403;
7861	LOC_Os11g10130	12.5789	2.89084	0.725386	7.91e-06	6.47e-05	MYB family transcription factor, putative, expressed	Os11g0207600	OsMyb12			Q0ITY5	Q0ITY5_ORYSJ	unreviewed	Os11g0207600 protein	Os11g0207600	nucleus [GO:0005634]; DNA binding [GO:0003677]		osa:4350036;	PF00249;
602	LOC_Os01g45110	242.167	2.88723	0.391764	1.31e-14	3.99e-13	anthocyanin 3-O-beta-glucosyltransferase, putative, expressed	Os01g0638000	OsUGT703A2			Q94CZ1	Q94CZ1_ORYSJ	unreviewed	Glycosyltransferase (EC 2.4.1.-)	Os01g0638000 OSNPB_010638000	integral component of membrane [GO:0016021]; intracellular membrane-bounded organelle [GO:0043231]; transferase activity, transferring hexosyl groups [GO:0016758]; UDP-glycosyltransferase activity [GO:0008194]		osa:4326578;	PF00201;
451	LOC_Os01g32780	79.0607	2.88598	0.305955	4.88e-22	3.33e-20	universal stress protein domain containing protein, putative, expressed	Os01g0511100				Q94E74	Q94E74_ORYSJ	unreviewed	Os01g0511100 protein (cDNA clone:J023069J05, full insert sequence)	Os01g0511100 OSNPB_010511100			osa:4324029;	PF00582;
578	LOC_Os01g43700	115.497	2.87646	0.271629	3.69e-27	4.02e-25	cytochrome P450 72A1, putative, expressed	Os01g0627400	OsCYP72A17			Q5ZE54	Q5ZE54_ORYSJ	unreviewed	Os01g0627400 protein	Os01g0627400 OSNPB_010627400	integral component of membrane [GO:0016021]; heme binding [GO:0020037]; iron ion binding [GO:0005506]; monooxygenase activity [GO:0004497]; oxidoreductase activity, acting on paired donors, with incorporation or reduction of molecular oxygen [GO:0016705]		osa:4326694;	PF00067;
5595	LOC_Os07g02690	58.2491	2.87135	0.376516	2.63e-15	8.82e-14	DUF538 domain containing protein, putative, expressed	Os07g0118200				Q8H5J1	Q8H5J1_ORYSJ	unreviewed	Os07g0118200 protein	Os07g0118200 OSNPB_070118200			osa:4342263;	PF04398;
2983	LOC_Os03g47620	2.16664	2.8523	3.70289	0.0083665	0.0294121	ankyrin, putative, expressed	NA	NA			Q9AUL8	Q9AUL8_ORYSJ	unreviewed	TPR Domain containing protein	LOC_Os03g47620				PF12796;PF13181;
7949	LOC_Os11g19864	18.8359	2.84848	0.59373	1.83e-07	2.02e-06	transposon protein, putative, Pong sub-class, expressed	Os11g0303800				A0A0P0Y203	A0A0P0Y203_ORYSJ	unreviewed	Ribosomal protein-like (Transposon protein, putative, ping/pong/SNOOPY sub-class)	LOC_Os11g19870 OSJNBa0042H24.31	ribosome [GO:0005840]		osa:107281171;	PF14303;
64	LOC_Os01g03890	4.82471	2.84755	1.43798	0.00446889	0.0174867	DUF260 domain containing protein, putative, expressed	Os01g0129600				Q9LG92	Q9LG92_ORYSJ	unreviewed	Os01g0129600 protein (Putative seed specific protein Bn15D17A)	Os01g0129600 OsJ_00237 P0408F06.25			osa:4325972;	PF03195;
6419	LOC_Os08g25860	35.3665	2.84709	0.441371	1.31e-11	2.68e-10	expressed protein	NA	NA			A3BS83	A3BS83_ORYSJ	unreviewed	Uncharacterized protein	OsJ_26999
117	LOC_Os01g06640	119.126	2.84495	0.258094	2.94e-29	3.88e-27	basic helix-loop-helix, putative, expressed	Os01g0159800	OsbHLH035, bHLH035, OsbHLH35, bHLH35			Q7F7Z2	Q7F7Z2_ORYSJ	unreviewed	ESTs C26093(C11622)		nucleus [GO:0005634]; protein dimerization activity [GO:0046983]; regulation of transcription, DNA-templated [GO:0006355]		osa:4324065;	PF00010;
118	LOC_Os01g06640	119.126	2.84495	0.258094	2.94e-29	3.88e-27	basic helix-loop-helix, putative, expressed	Os01g0159800	OsbHLH035, bHLH035, OsbHLH35, bHLH35			B7EZ72	B7EZ72_ORYSJ	unreviewed	cDNA clone:002-101-B04, full insert sequence
3540	LOC_Os04g30240	25.0281	2.84337	0.509624	2.89e-09	4.21e-08	OsWAK60 - OsWAK receptor-like protein kinase, expressed	Os04g0370900				B9FEQ4	B9FEQ4_ORYSJ	unreviewed	Uncharacterized protein	OsJ_14461	integral component of membrane [GO:0016021]; plasma membrane [GO:0005886]; ATP binding [GO:0005524]; calcium ion binding [GO:0005509]; polysaccharide binding [GO:0030247]; protein serine/threonine kinase activity [GO:0004674]; cell surface receptor signaling pathway [GO:0007166]; protein phosphorylation [GO:0006468]		osa:4335593;	PF13947;PF00069;
3818	LOC_Os04g44930	3.32755	2.83918	1.73695	0.00504791	0.0193508	expressed protein	Os04g0531800				A0A0P0WCT2	A0A0P0WCT2_ORYSJ	unreviewed	Os04g0531800 protein	Os04g0531800 OsJ_15571
3398	LOC_Os04g02980	6.07545	2.83588	1.19783	0.00170473	0.00767982	OsSub33 - Putative Subtilisin homologue, expressed	Os04g0120300	OsSub33, SUB33			Q7XTI6	Q7XTI6_ORYSJ	unreviewed	OSJNBa0020P07.18 protein	OSJNBa0020P07.18	serine-type endopeptidase activity [GO:0004252]			PF17766;PF05922;PF00082;
1161	LOC_Os01g70490	30.6621	2.83544	0.520588	5.19e-09	7.22e-08	potassium transporter, putative, expressed	Os01g0930400	OsHAK5, FCO13, OsFCO13			Q5JK32	HAK5_ORYSJ	reviewed	Potassium transporter 5 (OsHAK5)	HAK5 Os01g0930400 LOC_Os01g70490 OsJ_04644 OSJNBa0052O12.31 P0506E04.9	integral component of membrane [GO:0016021]; membrane [GO:0016020]; potassium ion transmembrane transporter activity [GO:0015079]; potassium ion transport [GO:0006813]	SUBCELLULAR LOCATION: Membrane {ECO:0000305}; Multi-pass membrane protein {ECO:0000305}.	osa:4326945;	PF02705;
7310	LOC_Os10g23050	43.1932	2.83182	0.460088	6.03e-11	1.13e-09	helix-loop-helix DNA-binding protein, putative, expressed	Os10g0376900	OsbHLH045			A0A5S6R7R5	A0A5S6R7R5_ORYSJ	unreviewed	Os10g0376900 protein (Putative helix-loop-helix DNA-binding protein)	Os10g0376900 OsJ_31307 OSJNBa0095C06.11	DNA binding [GO:0003677]; protein dimerization activity [GO:0046983]		osa:4348490;	PF00010;
8345	LOC_Os12g08930	24.6684	2.82324	0.513474	4.65e-09	6.53e-08	expressed protein	Os12g0191601				A3CFN2	A3CFN2_ORYSJ	unreviewed	Os12g0191601 protein	Os12g0191601 OsJ_35482
5774	LOC_Os07g23340	221.101	2.82062	0.331742	1.69e-18	8.13e-17	male sterility protein, putative, expressed	NA	NA			B9FWU3	B9FWU3_ORYSJ	unreviewed	Fatty acyl-CoA reductase (EC 1.2.1.84)	OsJ_23966	alcohol-forming fatty acyl-CoA reductase activity [GO:0102965]; fatty-acyl-CoA reductase (alcohol-forming) activity [GO:0080019]; lipid metabolic process [GO:0006629]			PF07993;PF03015;
7650	LOC_Os10g41999	148.941	2.81056	0.385342	2.64e-14	7.68e-13	RALFL27 - Rapid ALkalinization Factor RALF family protein precursor, expressed	Os10g0569500	OsRALF-29, OsRALF29, RALF-29			Q108X2	Q108X2_ORYSJ	unreviewed	Expressed protein	LOC_Os10g41999
7651	LOC_Os10g41999	148.941	2.81056	0.385342	2.64e-14	7.68e-13	RALFL27 - Rapid ALkalinization Factor RALF family protein precursor, expressed	Os10g0569600				Q108X2	Q108X2_ORYSJ	unreviewed	Expressed protein	LOC_Os10g41999
955	LOC_Os01g61900	8.4116	2.80964	0.917252	0.000233798	0.00134491	CCT motif family protein, expressed	Os01g0835700	OsCCT01, OsCMF1			Q5QMF4	Q5QMF4_ORYSJ	unreviewed	Os01g0835700 protein (cDNA clone:002-154-E04, full insert sequence)	Os01g0835700 OSNPB_010835700	nucleus [GO:0005634]; regulation of flower development [GO:0009909]	SUBCELLULAR LOCATION: Nucleus {ECO:0000256|PROSITE-ProRule:PRU00357}.	osa:4327455;	PF06203;
3400	LOC_Os04g03164	36.68	2.80775	0.557826	4.09e-08	4.97e-07	expressed protein	Os04g0121800				A0A0P0W6V3	A0A0P0W6V3_ORYSJ	unreviewed	Uncharacterized protein	OsJ_13599	integral component of membrane [GO:0016021]
2084	LOC_Os02g53130	488.822	2.80466	0.281805	2.29e-24	1.99e-22	nitrate reductase, putative, expressed	Os02g0770800	OsNIA1, OsNia1, NIA1, Nia1, OsNR, NR, OsNR2, NR2			A0A0P0VPX4	A0A0P0VPX4_ORYSJ	unreviewed	Os02g0770800 protein (Putative nitrate reductase [NAD(P)H])	Os02g0770800 OJ1353_F08.4	cytosol [GO:0005829]; FAD binding [GO:0071949]; heme binding [GO:0020037]; molybdenum ion binding [GO:0030151]; molybdopterin cofactor binding [GO:0043546]; nitrate reductase (NADH) activity [GO:0009703]; nitrate reductase (NADPH) activity [GO:0050464]; nitrate assimilation [GO:0042128]; nitric oxide biosynthetic process [GO:0006809]		osa:4330867;	PF00173;PF00970;PF03404;PF00175;PF00174;
1807	LOC_Os02g40710	99.1538	2.80441	0.386431	3.38e-14	9.64e-13	ammonium transporter protein, putative, expressed	Os02g0620500	OsAMT1;3, AMT1-3, Osamt1-2, "OsAMT1, 2", OsAMT1;2, OsAMT1.3, AMT1.2			Q6K9G3	AMT13_ORYSJ	reviewed	Ammonium transporter 1 member 3 (OsAMT1;3)	AMT1-3 AMT1-2 Os02g0620500 LOC_Os02g40710 OJ1234_B11.1 OJ1372_D06.26 OsJ_07561	integral component of plasma membrane [GO:0005887]; ammonium transmembrane transporter activity [GO:0008519]; ammonium transmembrane transport [GO:0072488]	SUBCELLULAR LOCATION: Membrane {ECO:0000305}; Multi-pass membrane protein {ECO:0000305}.	osa:4330007;	PF00909;
450	LOC_Os01g32770	446.269	2.80382	0.336138	6.33e-18	2.85e-16	DUF260 domain containing protein, putative, expressed	Os01g0511000				B9EX60	B9EX60_ORYSJ	unreviewed	LOB domain-containing protein	OsJ_01971				PF03195;
1753	LOC_Os02g37970	38.9006	2.7969	0.468949	2.43e-10	4.17e-09	DUF581 domain containing protein, expressed	Os02g0592833				Q0DZX7	Q0DZX7_ORYSJ	unreviewed	Os02g0592800 protein	Os02g0592800 OsJ_07343 OSJNBa0016G10.17			osa:4329840;	PF04570;
4348	LOC_Os05g11580	6.93905	2.78019	1.00405	0.000616614	0.00316063	expressed protein	Os05g0205400	OsCEP12, CEP12			A0A0P0WJ40	A0A0P0WJ40_ORYSJ	unreviewed	Uncharacterized protein OSJNBb0115F21.4	OSJNBb0115F21.4
5887	LOC_Os07g35260	13.7455	2.77567	0.807285	5.33e-05	0.000363433	TKL_IRAK_DUF26-lc.9 - DUF26 kinases have homology to DUF26 containing loci, expressed	Os07g0537000				Q7F1L6	Q7F1L6_ORYSJ	unreviewed	Os07g0537000 protein	Os07g0537000 OSNPB_070537000	integral component of membrane [GO:0016021]; plasma membrane [GO:0005886]; ATP binding [GO:0005524]; protein serine/threonine kinase activity [GO:0004674]; protein phosphorylation [GO:0006468]		osa:4343475;	PF07714;PF01657;
623	LOC_Os01g46810	622.47	2.7745	0.656686	1.75e-06	1.63e-05	viral A-type inclusion protein repeat containing protein, expressed	Os01g0656600				B9EYF0	B9EYF0_ORYSJ	unreviewed	Uncharacterized protein	OsJ_02876
805	LOC_Os01g54890	57.9859	2.76493	0.418038	3.64e-12	8.07e-11	ethylene-responsive transcription factor 2, putative, expressed	Os01g0752500	OsERF#092, OsERF092, OsERF92, ERF922, OsERF922, AP2/EREBP#078, AP2/EREBP78			Q0JJ98	Q0JJ98_ORYSJ	unreviewed	Os01g0752500 protein	Os01g0752500	nucleus [GO:0005634]; DNA binding [GO:0003677]; DNA-binding transcription factor activity [GO:0003700]	SUBCELLULAR LOCATION: Nucleus {ECO:0000256|SAAS:SAAS00550310}.		PF00847;
2009	LOC_Os02g50690	44.6255	2.75709	0.379767	4.4e-14	1.24e-12	GDSL-like lipase/acylhydrolase, putative, expressed	Os02g0740400	OsGELP44, OsGELP44a, OsGELP44b			Q6Z7T3	Q6Z7T3_ORYSJ	unreviewed	Os02g0740400 protein (cDNA clone:J033016K19, full insert sequence)	Os02g0740400 OSNPB_020740400	hydrolase activity, acting on ester bonds [GO:0016788]		osa:4330677;	PF00657;
7865	LOC_Os11g10480	408.621	2.7564	0.287732	8.81e-23	6.59e-21	dehydrogenase, putative, expressed	Os11g0210300	Adh1, Adh1/2, adh1/adh2, OsADH1			B6F2C1	B6F2C1_ORYSJ	unreviewed	ADH1 (Alcohol dehydrogenase 1) (cDNA clone:J023014M06, full insert sequence)	ADH1 adh1	oxidoreductase activity [GO:0016491]; zinc ion binding [GO:0008270]		osa:4350053;	PF08240;PF00107;
3351	LOC_Os03g63330	730.487	2.74768	0.218528	2.84e-37	6.91e-35	aspartokinase, chloroplast precursor, putative, expressed	Os03g0850400				Q851Z6	Q851Z6_ORYSJ	unreviewed	Aspartate kinase family protein, expressed	LOC_Os03g63330	aspartate kinase activity [GO:0004072]; lysine biosynthetic process via diaminopimelate [GO:0009089]; threonine biosynthetic process [GO:0009088]		osa:4334794;	PF00696;
4928	LOC_Os06g02650	2.10976	2.74452	3.82598	0.00887029	0.0308797	retrotransposon protein, putative, unclassified, expressed	NA	NA			Q5VPT3	Q5VPT3_ORYSJ	unreviewed	Uncharacterized protein OSJNBa0062J13.1	OSJNBa0062J13.1				PF04578;
3405	LOC_Os04g03796	162.573	2.73847	0.803162	4.32e-05	0.000300896	OsSub37 - Putative Subtilisin homologue, expressed	Os04g0127200	OsSub37, SUB37			B7F194	B7F194_ORYSJ	unreviewed	Os04g0127100 protein (cDNA clone:002-142-F02, full insert sequence)	Os04g0127100 OSNPB_040127100				PF05922;
3406	LOC_Os04g03796	162.573	2.73847	0.803162	4.32e-05	0.000300896	OsSub37 - Putative Subtilisin homologue, expressed	Os04g0127100	OsSub37, SUB37			Q6MW77	Q6MW77_ORYSJ	unreviewed	B1248C03.20 protein (B1340F09.6 protein)	B1248C03.20 B1340F09.6	serine-type endopeptidase activity [GO:0004252]			PF17766;PF05922;PF00082;
3407	LOC_Os04g03796	162.573	2.73847	0.803162	4.32e-05	0.000300896	OsSub37 - Putative Subtilisin homologue, expressed	Os04g0127100	OsSub37, SUB37			B7F194	B7F194_ORYSJ	unreviewed	Os04g0127100 protein (cDNA clone:002-142-F02, full insert sequence)	Os04g0127100 OSNPB_040127100				PF05922;
3408	LOC_Os04g03796	162.573	2.73847	0.803162	4.32e-05	0.000300896	OsSub37 - Putative Subtilisin homologue, expressed	Os04g0127100	OsSub37, SUB37			A0A0P0W6I6	A0A0P0W6I6_ORYSJ	unreviewed	Os04g0127200 protein (Fragment)	Os04g0127200	serine-type endopeptidase activity [GO:0004252]			PF17766;PF00082;
3409	LOC_Os04g03796	162.573	2.73847	0.803162	4.32e-05	0.000300896	OsSub37 - Putative Subtilisin homologue, expressed	Os04g0127200	OsSub37, SUB37			A0A0P0W6I6	A0A0P0W6I6_ORYSJ	unreviewed	Os04g0127200 protein (Fragment)	Os04g0127200	serine-type endopeptidase activity [GO:0004252]			PF17766;PF00082;
3410	LOC_Os04g03796	162.573	2.73847	0.803162	4.32e-05	0.000300896	OsSub37 - Putative Subtilisin homologue, expressed	Os04g0127200	OsSub37, SUB37			Q6MW77	Q6MW77_ORYSJ	unreviewed	B1248C03.20 protein (B1340F09.6 protein)	B1248C03.20 B1340F09.6	serine-type endopeptidase activity [GO:0004252]			PF17766;PF05922;PF00082;
1801	LOC_Os02g40200	35.5126	2.73352	0.547666	5.68e-08	6.74e-07	receptor-like protein kinase precursor, putative, expressed	Os02g0615500				Q6K7X3	Q6K7X3_ORYSJ	unreviewed	Os02g0615500 protein (cDNA clone:J013170D14, full insert sequence)	Os02g0615500 OSNPB_020615500	integral component of membrane [GO:0016021]; ATP binding [GO:0005524]; protein serine/threonine kinase activity [GO:0004674]		osa:4329982;	PF00560;PF13855;PF08263;PF00069;
8049	LOC_Os11g34970	17.0298	2.73198	0.717685	1.33e-05	0.0001039	NB-ARC domain containing protein, expressed	NA	NA			Q2R2Q9	Q2R2Q9_ORYSJ	unreviewed	NB-ARC domain containing protein, expressed	LOC_Os11g34970	ADP binding [GO:0043531]			PF00931;PF18052;
8009	LOC_Os11g31500	16.4039	2.73165	0.635648	1.94e-06	1.8e-05	ATP binding protein, putative, expressed	Os11g0514100				Q0ISI8	Q0ISI8_ORYSJ	unreviewed	Os11g0514100 protein	Os11g0514100
5062	LOC_Os06g10510	14.14	2.73036	0.738572	2.28e-05	0.000169119	oxidoreductase/ transition metal ion binding protein, putative, expressed	Os06g0206900				Q69TF5	Q69TF5_ORYSJ	unreviewed	Os06g0206900 protein (cDNA clone:J023086C11, full insert sequence)	Os06g0206900 OSNPB_060206900	integral component of membrane [GO:0016021]		osa:4340438;
3360	LOC_Os03g63700	115.481	2.72862	0.29541	2.76e-21	1.75e-19	AIG2-like family domain containing protein, expressed	Os03g0854000				Q0DLP0	Q0DLP0_ORYSJ	unreviewed	Expressed protein (Os03g0854000 protein)	Os03g0854000 Os03g63700 OsJ_13414	cytosol [GO:0005829]; gamma-glutamylaminecyclotransferase activity [GO:0061929]		osa:4334822;	PF06094;
1651	LOC_Os02g32320	21.1645	2.71829	0.594285	5.19e-07	5.34e-06	expressed protein	Os02g0523100				A0A0P0VJS0	A0A0P0VJS0_ORYSJ	unreviewed	Os02g0523100 protein	Os02g0523100 OSNPB_020523100			osa:107278022;	PF05553;
8218	LOC_Os12g02340	7.42703	2.71354	1.16582	0.00156167	0.0071117	LTPL14 - Protease inhibitor/seed storage/LTP family protein precursor, expressed	Os12g0115500	OsLTP1.20, OsLtpI.20, LTP1.20, OsLTPL14, LTPL14			Q2QYK9	Q2QYK9_ORYSJ	unreviewed	Nonspecific lipid-transfer protein 3, putative, expressed	LOC_Os12g02340	lipid binding [GO:0008289]; lipid transport [GO:0006869]
8219	LOC_Os12g02340	7.42703	2.71354	1.16582	0.00156167	0.0071117	LTPL14 - Protease inhibitor/seed storage/LTP family protein precursor, expressed	Os12g0115500	OsLTP1.20, OsLtpI.20, LTP1.20, OsLTPL14, LTPL14			A3CEC4	A3CEC4_ORYSJ	unreviewed	Uncharacterized protein	OsJ_34998	membrane [GO:0016020]; lipid binding [GO:0008289]; lipid transport [GO:0006869]		osa:4351320;	PF00234;
2723	LOC_Os03g21960	59.2612	2.70711	0.35155	1.38e-15	4.83e-14	aminotransferase, putative, expressed	Os03g0338000				Q0DS21	Q0DS21_ORYSJ	unreviewed	Os03g0338000 protein	Os03g0338000	pyridoxal phosphate binding [GO:0030170]; transaminase activity [GO:0008483]		osa:4332775;	PF00202;
6404	LOC_Os08g24300	161.708	2.70252	0.355817	2.75e-15	9.18e-14	expressed protein	Os08g0331800				Q6ZF99	Q6ZF99_ORYSJ	unreviewed	Os08g0331800 protein	Os08g0331800 OJ1224_G08.1 OsJ_26913 P0474F07.33
6095	LOC_Os07g45570	125.165	2.69996	0.255343	4.38e-27	4.76e-25	expressed protein	Os07g0650600	OsBLE2			Q69J23	Q69J23_ORYSJ	unreviewed	BLE2 protein (Os07g0650600 protein)	P0427D10.142 Os07g0650600 OSJNBa0084D17.4	integral component of membrane [GO:0016021]		osa:4344126;
8040	LOC_Os11g33450	5.59733	2.69914	1.17837	0.00216664	0.00944585	plant protein of unknown function domain containing protein, expressed	NA	NA			Q2R318	Q2R318_ORYSJ	unreviewed	Uncharacterized protein	LOC_Os11g33450	integral component of membrane [GO:0016021]			PF03140;
1072	LOC_Os01g66680	68.5323	2.68095	1.17725	0.00110147	0.00523427	S-domain receptor-like protein kinase, putative, expressed	Os01g0890600				B9EVA3	B9EVA3_ORYSJ	unreviewed	Receptor-like serine/threonine-protein kinase (EC 2.7.11.1)	OsJ_04364	integral component of membrane [GO:0016021]; ATP binding [GO:0005524]; protein serine/threonine kinase activity [GO:0004674]; recognition of pollen [GO:0048544]			PF01453;PF08276;PF00069;PF00954;
8487	LOC_Os12g30170	10.3407	2.67941	0.808602	9.42e-05	0.00059845	expressed protein	Os12g0486800				Q0INA9	Q0INA9_ORYSJ	unreviewed	Os12g0486800 protein	Os12g0486800
7027	LOC_Os09g31478	347.118	2.67937	0.212189	1.54e-37	3.91e-35	auxin efflux carrier component, putative, expressed	Os09g0491740	OsPILS1, PILS1			C7J739	C7J739_ORYSJ	unreviewed	Os09g0491740 protein	Os09g0491740	integral component of membrane [GO:0016021]; transmembrane transport [GO:0055085]			PF03547;
7028	LOC_Os09g31478	347.118	2.67937	0.212189	1.54e-37	3.91e-35	auxin efflux carrier component, putative, expressed	Os09g0491740	OsPILS1, PILS1			B9G4B2	B9G4B2_ORYSJ	unreviewed	Uncharacterized protein	OsJ_29847	integral component of membrane [GO:0016021]; transmembrane transport [GO:0055085]		osa:9272362;	PF03547;
5974	LOC_Os07g39530	54.695	2.67843	0.354065	4.04e-15	1.32e-13	BTBN16 - Bric-a-Brac, Tramtrack, Broad Complex BTB domain with non-phototropic hypocotyl 3 NPH3 domain, expressed	Os07g0584200				B9FY44	B9FY44_ORYSJ	unreviewed	NPH3 domain-containing protein	OsJ_24905				PF03000;
542	LOC_Os01g41810	47.4599	2.67665	0.375443	1.1e-13	2.92e-12	cytochrome P450 72A1, putative, expressed	Os01g0602400	OsCYP72A32			Q8S1C7	Q8S1C7_ORYSJ	unreviewed	Cytochrome P450 monooxygenase (Os01g0602400 protein)	CYP72A32 Os01g0602400 OSNPB_010602400	integral component of membrane [GO:0016021]; heme binding [GO:0020037]; iron ion binding [GO:0005506]; monooxygenase activity [GO:0004497]; oxidoreductase activity, acting on paired donors, with incorporation or reduction of molecular oxygen [GO:0016705]		osa:4324604;	PF00067;
4859	LOC_Os05g50380	118.314	2.67477	0.391619	8.09e-13	1.92e-11	glucose-1-phosphate adenylyltransferase large subunit, chloroplast precursor, putative, expressed	Os05g0580000	OsAGPL3, APL3, OsAPL3, AGPlar, OsAGPL1, AGPL1			Q688T8	GLGL3_ORYSJ	reviewed	Glucose-1-phosphate adenylyltransferase large subunit 3, chloroplastic/amyloplastic (OsAGPL3) (OsAPL3) (EC 2.7.7.27) (ADP-glucose pyrophosphorylase AGPL3) (ADP-glucose synthase AGPL3)	AGPL3 APL3 Os05g0580000 LOC_Os05g50380 10A19I.12 OsJ_19673 OSJNBa0017N18.13	chloroplast [GO:0009507]; ATP binding [GO:0005524]; glucose-1-phosphate adenylyltransferase activity [GO:0008878]; glycogen biosynthetic process [GO:0005978]; starch biosynthetic process [GO:0019252]	SUBCELLULAR LOCATION: Plastid, chloroplast {ECO:0000269|PubMed:17406793}.	osa:4339718;	PF00483;
7172	LOC_Os10g02300	63.0635	2.6598	0.346176	1.68e-15	5.83e-14	uncharacterized Cys-rich domain containing protein, putative, expressed	Os10g0112100	OsFWL5, FWL5, OsPcr1, OsPCR1, OsFWL5/OsPCR1			Q33BF6	Q33BF6_ORYSJ	unreviewed	Os10g0112100 protein (cDNA clone:002-143-F03, full insert sequence)	LOC_Os10g02300 Os10g0112100 OSNPB_100112100			osa:4347973;	PF04749;
5726	LOC_Os07g11080	7.71388	2.6556	0.931846	0.000468451	0.00249202	retrotransposon protein, putative, unclassified, expressed	NA	NA			Q6AV62	Q6AV62_ORYSJ	unreviewed	Zinc knuckle domain containing protein	OSJNBa0035N15.6	nucleic acid binding [GO:0003676]; zinc ion binding [GO:0008270]			PF13976;PF07727;
7187	LOC_Os10g03900	3.06755	2.65145	1.82087	0.00728063	0.0262627	expressed protein	NA	NA			Q8S803	Q8S803_ORYSJ	unreviewed	Uncharacterized protein	LOC_Os10g03900
8489	LOC_Os12g30520	75.7029	2.63947	0.351941	7.04e-15	2.2e-13	pumilio-family RNA binding repeat containing protein, expressed	Os12g0488900	OsPuf4			Q0INA4	Q0INA4_ORYSJ	unreviewed	Os12g0488900 protein	Os12g0488900 OsJ_36125	cytoplasm [GO:0005737]; mRNA binding [GO:0003729]; posttranscriptional regulation of gene expression [GO:0010608]		osa:4352241;	PF00806;
7786	LOC_Os11g05700	464.356	2.63439	0.208832	1.74e-37	4.32e-35	ABC transporter family protein, putative, expressed	Os11g0155600	OsABCC16, OsMRP16			Q53QH6	Q53QH6_ORYSJ	unreviewed	ABC transporter, putative	LOC_Os11g05700 OsJ_33016	integral component of membrane [GO:0016021]; ATP binding [GO:0005524]; ATPase activity [GO:0016887]; ATPase-coupled transmembrane transporter activity [GO:0042626]			PF00664;PF00005;
4097	LOC_Os04g57180	23.9864	2.63109	0.631572	3.06e-06	2.72e-05	flavonol synthase/flavanone 3-hydroxylase, putative, expressed	Os04g0667400	OsSTA135, STA135, OsODD21, ODD21, 2-ODD21, Os2-ODD21, Os2ODD21, M2H, OsM2H			Q7XR83	Q7XR83_ORYSJ	unreviewed	Os04g0667400 protein	Os04g0667400 OSNPB_040667400	dioxygenase activity [GO:0051213]; metal ion binding [GO:0046872]		osa:4337327;	PF03171;PF14226;
6127	LOC_Os07g47670	347.433	2.62629	0.298773	1.41e-19	7.57e-18	hypoxia-responsive family protein, putative, expressed	Os07g0673900	OsHIGD2, HIGD2			A0A0P0XA93	A0A0P0XA93_ORYSJ	unreviewed	Uncharacterized protein	OsJ_25548	integral component of mitochondrial inner membrane [GO:0031305]; mitochondrial respirasome [GO:0005746]; mitochondrial respiratory chain complex IV assembly [GO:0033617]		osa:4344259;	PF04588;
8012	LOC_Os11g31550	28.5815	2.61919	0.680495	1.02e-05	8.16e-05	BRASSINOSTEROID INSENSITIVE 1-associated receptor kinase 1 precursor, putative, expressed	NA	NA			Q2R3L2	Q2R3L2_ORYSJ	unreviewed	Leucine Rich Repeat family protein	LOC_Os11g31550				PF13855;PF08263;
6943	LOC_Os09g27040	394.781	2.61562	0.242706	4.2e-28	4.98e-26	GEX1, putative, expressed	Os09g0442400				Q67UU1	Q67UU1_ORYSJ	unreviewed	Os09g0442400 protein	Os09g0442400 OSNPB_090442400	integral component of membrane [GO:0016021]		osa:4347181;
582	LOC_Os01g43800	3.22406	2.60804	1.86762	0.00715761	0.0258808	retrotransposon protein, putative, unclassified, expressed	NA	NA			Q94HV2	Q94HV2_ORYSJ	unreviewed	Retrotransposon protein, putative, unclassified	LOC_Os10g16860	nucleic acid binding [GO:0003676]; RNA-DNA hybrid ribonuclease activity [GO:0004523]; DNA integration [GO:0015074]			PF03732;PF17917;PF00665;PF00078;PF13456;
412	LOC_Os01g26120	6.59084	2.60632	1.08293	0.00151276	0.00691746	membrane associated DUF588 domain containing protein, putative, expressed	Os01g0363300				Q9ARX2	CSPL8_ORYSJ	reviewed	CASP-like protein 1E1 (OsCASPL1E1)	Os01g0363300 LOC_Os01g26120 OsJ_01759 P0460H02.47 P0503E05.9	Casparian strip [GO:0048226]; integral component of membrane [GO:0016021]; plasma membrane [GO:0005886]; 4 iron, 4 sulfur cluster binding [GO:0051539]; cell wall modification [GO:0042545]; cell-cell junction assembly [GO:0007043]	SUBCELLULAR LOCATION: Cell membrane {ECO:0000250}; Multi-pass membrane protein {ECO:0000250}.	osa:4325816;	PF04535;
5799	LOC_Os07g26870	5.48968	2.60612	1.18846	0.00263142	0.0111407	cytochrome P450, putative, expressed	Os07g0451300				A0A0P0X586	A0A0P0X586_ORYSJ	unreviewed	Os07g0451300 protein (Putative Cytochrome P450 77A3)	OSJNBb0062P14.106 Os07g0451300 OSJNBb0015I22.134	integral component of membrane [GO:0016021]; membrane [GO:0016020]; heme binding [GO:0020037]; iron ion binding [GO:0005506]; oxidoreductase activity, acting on paired donors, with incorporation or reduction of molecular oxygen, NAD(P)H as one donor, and incorporation of one atom of oxygen [GO:0016709]		osa:4343126;	PF00067;
7547	LOC_Os10g39100	348.305	2.60196	0.275421	3.09e-22	2.15e-20	uncharacterized Cys-rich domain containing protein, putative, expressed	Os10g0535800				A3C6U3	A3C6U3_ORYSJ	unreviewed	Uncharacterized protein OSJNBb0060I05.12	OSJNBb0060I05.12 OsJ_32279			osa:4349235;
5852	LOC_Os07g32570	479.764	2.59743	0.177809	2.42e-49	1.2e-46	OsAPRL1 adenosine 5'-phosphosulfate reductase-like OsAPRL1, expressed	Os07g0509800	OsAPRL1			Q6Z4A7	APR1_ORYSJ	reviewed	Probable 5'-adenylylsulfate reductase 1, chloroplastic (EC 1.8.4.9) (Adenosine 5'-phosphosulfate 5'-adenylylsulfate sulfotransferase 1) (APS sulfotransferase 1) (Adenosine 5'-phosphosulfate reductase-like 1) (APR-like1) (OsAPRL1) (Thioredoxin-independent APS reductase 1)	APR1 Os07g0509800 LOC_Os07g32570 P0409B11.14	cell [GO:0005623]; chloroplast [GO:0009507]; 4 iron, 4 sulfur cluster binding [GO:0051539]; adenylyl-sulfate reductase (glutathione) activity [GO:0033741]; metal ion binding [GO:0046872]; cell redox homeostasis [GO:0045454]; cysteine biosynthetic process [GO:0019344]; sulfate reduction [GO:0019419]	SUBCELLULAR LOCATION: Plastid, chloroplast {ECO:0000305}.	osa:4343348;	PF01507;PF00085;
4366	LOC_Os05g14370	7.89064	2.5898	1.0233	0.00100113	0.00481979	WRKY82, expressed	NA	NA			A0A0P0WJL0	A0A0P0WJL0_ORYSJ	unreviewed	Os05g0233100 protein	Os05g0233100 OSNPB_050233100	nucleus [GO:0005634]; DNA-binding transcription factor activity [GO:0003700]; sequence-specific DNA binding [GO:0043565]	SUBCELLULAR LOCATION: Nucleus {ECO:0000256|SAAS:SAAS00875356}.	osa:107276056;	PF03106;
6810	LOC_Os09g13400	10.862	2.58804	0.809591	0.000144283	0.000873564	expressed protein	Os09g0304400				Q69K90	Q69K90_ORYSJ	unreviewed	Uncharacterized protein OSJNBb0079K11.18	OSJNBb0079K11.18
8158	LOC_Os11g45400	10.9387	2.58568	1.06393	0.00110088	0.00523376	glycerol-3-phosphate acyltransferase, putative, expressed	Os11g0679700	OsGPAT3			A0A0P0Y5A6	A0A0P0Y5A6_ORYSJ	unreviewed	Os11g0679700 protein (Fragment)	Os11g0679700 OSNPB_110679700	membrane [GO:0016020]; glycerol-3-phosphate 2-O-acyltransferase activity [GO:0090447]; phosphatase activity [GO:0016791]; cutin biosynthetic process [GO:0010143]			PF01553;
7824	LOC_Os11g07120	45.0614	2.58404	0.458223	1.84e-09	2.76e-08	receptor kinase-like protein, identical, putative, expressed	NA	NA			Q53P87	Q53P87_ORYSJ	unreviewed	Leucine Rich Repeat family protein, expressed	LOC_Os11g07120	integral component of membrane [GO:0016021]; ATP binding [GO:0005524]; protein serine/threonine kinase activity [GO:0004674]			PF00560;PF08263;PF07714;
5165	LOC_Os06g18990	8.4557	2.58392	0.857592	0.000288442	0.00161867	embryogenesis transmembrane protein, putative, expressed	Os06g0294000				A3BAV7	A3BAV7_ORYSJ	unreviewed	Embryogenesis transmembrane protein-like (Os06g0294000 protein)	Os06g0294000 OsJ_21035 P0036B02.1	integral component of membrane [GO:0016021]; membrane [GO:0016020]		osa:4340798;	PF13962;
7969	LOC_Os11g26750	3.7379	2.57787	2.18067	0.00789499	0.028071	dehydrin, putative, expressed	Os11g0453900	rab21, OsLEA26, Rab16D, OsRab16			Q2R4Z8	DH16D_ORYSJ	reviewed	Dehydrin Rab16D	RAB16D Os11g0453900 LOC_Os11g26750 OsJ_032468	cytosol [GO:0005829]; cold acclimation [GO:0009631]; response to abscisic acid [GO:0009737]; response to water deprivation [GO:0009414]		osa:4350451;	PF00257;
7974	LOC_Os11g27430	25.2559	2.57705	0.559992	4.42e-07	4.58e-06	NB-ARC domain containing protein, expressed	Os11g0462500				A3CB31	A3CB31_ORYSJ	unreviewed	Uncharacterized protein	OsJ_33832	ADP binding [GO:0043531]			PF00931;PF18052;
8074	LOC_Os11g37090	12.952	2.57669	0.68341	1.8e-05	0.000136842	pumilio-family RNA binding repeat domain containing protein, expressed	Os11g0579900				Q2R241	Q2R241_ORYSJ	unreviewed	Os11g0579900 protein (Pumilio-family RNA binding repeat containing protein, expressed) (cDNA clone:J033091K07, full insert sequence)	LOC_Os11g37090 Os11g0579900 OSNPB_110579900	cytoplasm [GO:0005737]; mRNA binding [GO:0003729]; posttranscriptional regulation of gene expression [GO:0010608]		osa:4350783;	PF00806;
2086	LOC_Os02g53160	111.552	2.57549	0.25592	8.26e-25	7.53e-23	tyrosine phosphatase family protein, putative, expressed	Os02g0771400	OsPFA-DSP2, OsPP39			Q0DX67	DSP2_ORYSJ	reviewed	Probable tyrosine-protein phosphatase DSP2 (EC 3.1.3.48) (Protein PLANT AND FUNGI ATYPICAL DUAL-SPECIFICITY PHOSPHATASE 2) (OsPFA-DSP2)	DSP2 Os02g0771400 LOC_Os02g53160	cytoplasm [GO:0005737]; nucleus [GO:0005634]; protein tyrosine phosphatase activity [GO:0004725]; defense response [GO:0006952]; regulation of defense response to fungus [GO:1900150]	SUBCELLULAR LOCATION: Cytoplasm {ECO:0000269|PubMed:22514699}. Nucleus {ECO:0000269|PubMed:22514699}.		PF03162;
422	LOC_Os01g27340	15.2474	2.57214	0.639305	6.17e-06	5.16e-05	glutathione S-transferase, putative, expressed	Os01g0370900	OsGSTF8			Q9AS53	Q9AS53_ORYSJ	unreviewed	Putative glutathione transferase	OsJ_01797 P0493G01.27	transferase activity [GO:0016740]		osa:4325709;	PF00043;PF02798;
655	LOC_Os01g48360	32.3466	2.57097	0.429625	2.77e-10	4.72e-09	expressed protein	Os01g0674400				Q8L4D7	Q8L4D7_ORYSJ	unreviewed	Uncharacterized protein	OJ1117_G01.1 P0485G01.35
656	LOC_Os01g48360	32.3466	2.57097	0.429625	2.77e-10	4.72e-09	expressed protein	Os01g0674400				A0A0P0V6G5	A0A0P0V6G5_ORYSJ	unreviewed	Os01g0674400 protein	Os01g0674400 OSNPB_010674400
8198	LOC_Os12g01490	49.656	2.56576	0.366368	2.93e-13	7.4e-12	MYB family transcription factor, putative, expressed	Os12g0105600				Q2QYV2	Q2QYV2_ORYSJ	unreviewed	Myb-like DNA-binding domain, SHAQKYF class family protein, expressed (Os12g0105600 protein)	LOC_Os12g01490 Os12g0105600 OSNPB_120105600	nucleus [GO:0005634]; DNA binding [GO:0003677]	SUBCELLULAR LOCATION: Nucleus {ECO:0000256|SAAS:SAAS00566530}.	osa:4351260;	PF00249;
95	LOC_Os01g05650	2088.64	2.56246	0.15475	1.51e-62	1.59e-59	metallothionein, putative, expressed	Os01g0149800	OsMT2a, MT2a, met6, Osmet6, OsMT-2, MT-2, rgMT-2, OsMT-I-2a, OsMT2-1, MT-I-2a, MT2-1			P94029	MT2A_ORYSJ	reviewed	Metallothionein-like protein 2A (Class I metallothionein-like protein 2A) (OsMT-I-2a) (OsMT2a) (OsMT2-1)	MT2A MT-2 Os01g0149800 LOC_Os01g05650 OsJ_00383 P0434B04.33	metal ion binding [GO:0046872]		osa:4325218;	PF01439;
328	LOC_Os01g18080	155.681	2.55863	0.239951	1.59e-27	1.8e-25	retrotransposon protein, putative, unclassified, expressed	Os01g0283300				Q0JNK0	Q0JNK0_ORYSJ	unreviewed	Os01g0283300 protein (Putative GABA-A receptor epsilon-like subunit)	Os01g0283300 OsJ_01334 P0581F09.21			osa:4327905;
4269	LOC_Os05g05080	26.6216	2.55587	0.530882	1.44e-07	1.62e-06	expressed protein	Os05g0142600				B9FH57	B9FH57_ORYSJ	unreviewed	Os05g0142600 protein	Os05g0142600 OSNPB_050142600
1808	LOC_Os02g40730	807.057	2.55532	0.222647	1.71e-31	2.85e-29	ammonium transporter protein, putative, expressed	Os02g0620600	OsAMT1;2, AMT1-2, Osamt1-3, "OsAMT1, 3", OsAMT1;3, OsAMT1.3, OsAMT1.2, AMT1.2			Q6K9G1	AMT12_ORYSJ	reviewed	Ammonium transporter 1 member 2 (OsAMT1;2)	AMT1-2 AMT1-3 Os02g0620600 LOC_Os02g40730 OJ1234_B11.3 OJ1372_D06.28 OsJ_07562	integral component of plasma membrane [GO:0005887]; ammonium transmembrane transporter activity [GO:0008519]; ammonium transmembrane transport [GO:0072488]	SUBCELLULAR LOCATION: Membrane {ECO:0000305}; Multi-pass membrane protein {ECO:0000305}.	osa:4330008;	PF00909;
8547	LOC_Os12g36680	39.2446	2.55251	0.466042	4.53e-09	6.4e-08	expressed protein	Os12g0552800				Q0IMR1	Q0IMR1_ORYSJ	unreviewed	Os12g0552800 protein	Os12g0552800	integral component of membrane [GO:0016021]
5706	LOC_Os07g09610	32.0364	2.54832	0.427254	2.89e-10	4.89e-09	CAMK_KIN1/SNF1/Nim1_like_AMPKh.1 - CAMK includes calcium/calmodulin depedent protein kinases, expressed	Os07g0194100	SnRK1B, OsSnRK1B			Q0D7Z9	Q0D7Z9_ORYSJ	unreviewed	Os07g0194100 protein (Putative SnRK1b protein kinase)	Os07g0194100 OJ1118_E12.20 OJ1715_A07.1	cytoplasm [GO:0005737]; nucleus [GO:0005634]; ATP binding [GO:0005524]; protein serine/threonine kinase activity [GO:0004674]; intracellular signal transduction [GO:0035556]; protein phosphorylation [GO:0006468]		osa:4342639;	PF02149;PF00069;
102	LOC_Os01g05870	25.7599	2.54569	0.605742	2.46e-06	2.24e-05	receptor kinase, putative, expressed	Os01g0152000				Q9LGI5	Q9LGI5_ORYSJ	unreviewed	Os01g0152000 protein	Os01g0152000 OSNPB_010152000	integral component of membrane [GO:0016021]; ATP binding [GO:0005524]; protein serine/threonine kinase activity [GO:0004674]		osa:4324494;	PF00560;PF13516;PF13855;PF08263;PF00069;
4646	LOC_Os05g39540	512.238	2.54408	0.189674	5.45e-42	1.84e-39	metal cation transporter, putative, expressed	Os05g0472400	OsZIP9, ZIP9			Q0DHE3	ZIP9_ORYSJ	reviewed	Zinc transporter 9 (ZRT/IRT-like protein 9) (OsZIP9)	ZIP9 Os05g0472400 LOC_Os05g39540	integral component of membrane [GO:0016021]; membrane [GO:0016020]; plasma membrane [GO:0005886]; zinc ion transmembrane transporter activity [GO:0005385]; zinc ion transmembrane transport [GO:0071577]	SUBCELLULAR LOCATION: Cell membrane {ECO:0000305}; Multi-pass membrane protein {ECO:0000305}.	osa:4339080;	PF02535;
5775	LOC_Os07g23380	37.8988	2.54343	0.468893	6.15e-09	8.48e-08	acyl CoA reductase, putative, expressed	Os07g0416600				A0A0P0X4Y9	A0A0P0X4Y9_ORYSJ	unreviewed	Fatty acyl-CoA reductase (EC 1.2.1.84)	Os07g0416600 OSNPB_070416600	intracellular membrane-bounded organelle [GO:0043231]; alcohol-forming fatty acyl-CoA reductase activity [GO:0102965]; fatty-acyl-CoA reductase (alcohol-forming) activity [GO:0080019]; lipid metabolic process [GO:0006629]; long-chain fatty-acyl-CoA metabolic process [GO:0035336]; suberin biosynthetic process [GO:0010345]			PF07993;
5330	LOC_Os06g40440	14.7517	2.54105	0.632789	6.82e-06	5.65e-05	expressed protein	Os06g0606700				Q69Q43	Q69Q43_ORYSJ	unreviewed	Os06g0606700 protein	Os06g0606700 OSNPB_060606700			osa:4341478;
4670	LOC_Os05g40400	9.40623	2.53774	0.800812	0.000168959	0.00100495	harpin-induced protein 1 domain containing protein, expressed	Os05g0482501				A0A0P0WNQ9	A0A0P0WNQ9_ORYSJ	unreviewed	Os05g0482501 protein	Os05g0482501 OSNPB_050482501	integral component of membrane [GO:0016021]		osa:107278337;	PF03168;
1107	LOC_Os01g67860	9941.26	2.53369	0.200549	1.36e-37	3.47e-35	fructose-bisphospate aldolase isozyme, putative, expressed	Os01g0905800	AldC-1			Q5N725	ALFC3_ORYSJ	reviewed	Fructose-bisphosphate aldolase 3, cytoplasmic (EC 4.1.2.13) (Aldolase C-1) (AldC-1)	FBA3 Os01g0905800 LOC_Os01g67860 B1417F08.1-1	cytosol [GO:0005829]; fructose-bisphosphate aldolase activity [GO:0004332]; fructose 1,6-bisphosphate metabolic process [GO:0030388]; gluconeogenesis [GO:0006094]; glycolytic process [GO:0006096]	SUBCELLULAR LOCATION: Cytoplasm, cytosol {ECO:0000250|UniProtKB:Q9SJQ9}.	osa:4325027;	PF00274;
6448	LOC_Os08g29910	2.97958	2.53323	1.84909	0.00827923	0.0291897	prenyltransferase, putative	NA	NA			Q0J5Y4	Q0J5Y4_ORYSJ	unreviewed	Os08g0388900 protein	Os08g0388900	integral component of membrane [GO:0016021]; transferase activity, transferring alkyl or aryl (other than methyl) groups [GO:0016765]			PF01040;
4755	LOC_Os05g45020	129.532	2.53011	0.787983	9.36e-05	0.000595281	zinc finger/CCCH transcription factor, putative, expressed	Os05g0525900	OsC3H37, OsTZF7, OsCCCH-Zn-1			B7F147	B7F147_ORYSJ	unreviewed	Zinc finger protein (cDNA clone:002-140-H10, full insert sequence)		metal ion binding [GO:0046872]		osa:4339379;	PF00642;
8414	LOC_Os12g17950	8.54083	2.52825	0.948274	0.000732663	0.00366833	expressed protein	Os12g0277900				Q2QU02	Q2QU02_ORYSJ	unreviewed	Os12g0277900 protein	LOC_Os12g17950 Os12g0277900 OSNPB_120277900	integral component of membrane [GO:0016021]		osa:107276434;
1391	LOC_Os02g08330	26.4867	2.52749	0.560219	6.06e-07	6.14e-06	gp176, putative, expressed	Os02g0179600				Q6ETK8	Q6ETK8_ORYSJ	unreviewed	Os02g0179600 protein	Os02g0179600 OSNPB_020179600				PF11443;
5866	LOC_Os07g33780	401.214	2.52646	0.33142	2.39e-15	8.07e-14	pleiotropic drug resistance protein 5, putative, expressed	Os07g0522500	ABCG43, OsABCG43, ABCG43/PDR5, OsPDR5			B9FXK4	B9FXK4_ORYSJ	unreviewed	Uncharacterized protein	OsJ_24490	integral component of membrane [GO:0016021]; ATP binding [GO:0005524]; ATPase activity [GO:0016887]			PF01061;PF00005;PF14510;PF08370;
2069	LOC_Os02g52730	74.1697	2.52582	0.427193	3.08e-10	5.2e-09	ferredoxin--nitrite reductase, putative, expressed	Os02g0765900				B9F3E6	B9F3E6_ORYSJ	unreviewed	Uncharacterized protein	OsJ_08501	heme binding [GO:0020037]; iron-sulfur cluster binding [GO:0051536]; oxidoreductase activity [GO:0016491]		osa:4330835;	PF01077;PF03460;
8084	LOC_Os11g37940	100.7	2.52544	0.285271	8.45e-20	4.6e-18	WIP2 - Wound-induced protein precursor, expressed	Os11g0591800	OsPR4d			A3CCY8	A3CCY8_ORYSJ	unreviewed	Os11g0591800 protein	Os11g0591800 OsJ_34488	defense response to bacterium [GO:0042742]; defense response to fungus [GO:0050832]		osa:4350820;	PF00967;
7622	LOC_Os10g40960	49.6439	2.52467	0.414876	1.19e-10	2.12e-09	oxidoreductase, 2OG-Fe oxygenase family protein, putative, expressed	Os10g0558900	2-ODD24, Os2-ODD24, 2ODD24, Os2ODD24			Q7XC81	Q7XC81_ORYSJ	unreviewed	Oxidoreductase, 2OG-Fe oxygenase family protein, expressed (cDNA clone:J013156L02, full insert sequence)	LOC_Os10g40960	oxidoreductase activity [GO:0016491]; plant-type secondary cell wall biogenesis [GO:0009834]			PF03171;
6174	LOC_Os08g01150	50.1049	2.52404	0.36606	5.78e-13	1.4e-11	DTA2, putative, expressed	Os08g0101800				Q6Z1Y8	Q6Z1Y8_ORYSJ	unreviewed	Os08g0101800 protein	Os08g0101800 OSNPB_080101800	integral component of membrane [GO:0016021]		osa:4344422;	PF05686;
2887	LOC_Os03g38800	49.0545	2.52295	0.381805	4.17e-12	9.18e-11	AAA family ATPase, putative, expressed	Os03g0584400				Q6F2W7	Q6F2W7_ORYSJ	unreviewed	ATPase, AAA family protein, expressed	LOC_Os03g38800	ATP binding [GO:0005524]		osa:4333339;	PF00004;PF14363;
3911	LOC_Os04g49210	285.194	2.52193	1.18629	0.00162703	0.00737348	naringenin,2-oxoglutarate 3-dioxygenase, putative, expressed	Os04g0581100	OsS3H, S3H, 2-ODD1, Os2-ODD1, 2ODD1, Os2ODD1			A0A0P0WDV6	A0A0P0WDV6_ORYSJ	unreviewed	OSJNBa0064M23.15 protein (Os04g0581100 protein)	Os04g0581100 OsJ_15897 OSJNBa0064M23.15	dioxygenase activity [GO:0051213]; metal ion binding [GO:0046872]		osa:4336765;	PF03171;PF14226;
4258	LOC_Os05g04640	12.5549	2.51923	0.683593	2.54e-05	0.000186127	WRKY5, expressed	Os05g0137500	OsWRKY5			Q75L34	Q75L34_ORYSJ	unreviewed	WRKY transcription factor 5	OJ1127_B08.14	nucleus [GO:0005634]; DNA-binding transcription factor activity [GO:0003700]; sequence-specific DNA binding [GO:0043565]	SUBCELLULAR LOCATION: Nucleus {ECO:0000256|SAAS:SAAS00875356}.		PF03106;
5728	LOC_Os07g11739	27.2874	2.50783	0.509685	9.68e-08	1.11e-06	cytochrome P450, putative, expressed	Os07g0217600	Oscyp71Z2			Q0D7R6	Q0D7R6_ORYSJ	unreviewed	Os07g0217600 protein (Putative cytochrome P450 71D7)	Os07g0217600 OSJNBa0031C24.111	membrane [GO:0016020]; heme binding [GO:0020037]; iron ion binding [GO:0005506]; oxidoreductase activity, acting on paired donors, with incorporation or reduction of molecular oxygen, NAD(P)H as one donor, and incorporation of one atom of oxygen [GO:0016709]		osa:4342731;	PF00067;
7642	LOC_Os10g41660	2.93121	2.50398	1.86231	0.00873469	0.0305125	zinc finger, C3HC4 type domain containing protein, expressed	Os10g0566400				Q336R1	Q336R1_ORYSJ	unreviewed	Os10g0566400 protein (Zinc finger, C3HC4 type family protein, expressed) (cDNA clone:002-149-F01, full insert sequence)	LOC_Os10g41660 Os10g0566400 OSNPB_100566400	integral component of membrane [GO:0016021]; ubiquitin protein ligase activity [GO:0061630]; ubiquitin-dependent protein catabolic process [GO:0006511]		osa:4349424;	PF13639;
3595	LOC_Os04g33660	49.9859	2.50052	0.3847	8.1e-12	1.7e-10	bifunctional monodehydroascorbate reductase and carbonic anhydrasenectarin-3 precursor, putative, expressed	Os04g0412500	OsalphaCA2, alphaCA2			B9FF31	B9FF31_ORYSJ	unreviewed	Uncharacterized protein	OsJ_14731	carbonate dehydratase activity [GO:0004089]; zinc ion binding [GO:0008270]		osa:4335782;	PF00194;
8458	LOC_Os12g24650	84.9549	2.49743	0.292572	1.47e-18	7.13e-17	leucine aminopeptidase, chloroplast precursor, putative, expressed	Os12g0434400				B9GCY2	B9GCY2_ORYSJ	unreviewed	CYTOSOL_AP domain-containing protein	OsJ_35947	cytoplasm [GO:0005737]; aminopeptidase activity [GO:0004177]; manganese ion binding [GO:0030145]; metalloexopeptidase activity [GO:0008235]			PF00883;PF02789;
8514	LOC_Os12g32760	19.1918	2.49678	0.599514	3.16e-06	2.8e-05	transporter family protein, putative, expressed	Os12g0512100				Q0IN24	Q0IN24_ORYSJ	unreviewed	Os12g0512100 protein	Os12g0512100	integral component of plasma membrane [GO:0005887]; carbohydrate:proton symporter activity [GO:0005351]; glucose import [GO:0046323]		osa:4352329;	PF00083;
977	LOC_Os01g62830	66.7505	2.49582	0.341289	2.93e-14	8.45e-13	expressed protein	Os01g0847100				Q5N788	Q5N788_ORYSJ	unreviewed	Os01g0847100 protein	Os01g0847100 OSNPB_010847100			osa:4327471;
3612	LOC_Os04g34330	78.0146	2.49354	0.32542	1.85e-15	6.36e-14	serine/threonine-protein kinase receptor precursor, putative, expressed	Os04g0420600				B9FBW5	B9FBW5_ORYSJ	unreviewed	Receptor-like serine/threonine-protein kinase (EC 2.7.11.1)	OsJ_14791	integral component of membrane [GO:0016021]; ATP binding [GO:0005524]; protein serine/threonine kinase activity [GO:0004674]; recognition of pollen [GO:0048544]		osa:4335830;	PF01453;PF08276;PF00069;PF00954;
3193	LOC_Os03g57200	261.435	2.49331	0.227618	6.01e-29	7.66e-27	glutathione S-transferase, putative, expressed	Os03g0785900	OsGSTU1			Q10CE7	GSTU1_ORYSJ	reviewed	Probable glutathione S-transferase GSTU1 (EC 2.5.1.18)	GSTU1 GST1 Os03g0785900 LOC_Os03g57200 OsJ_012308	cytoplasm [GO:0005737]; glutathione transferase activity [GO:0004364]; glutathione metabolic process [GO:0006749]		osa:4334347;	PF13417;
5263	LOC_Os06g35540	437.926	2.49165	0.225374	2.17e-29	2.9e-27	aminotransferase, classes I and II, domain containing protein, expressed	Os06g0548000				A0A0P0WXM3	A0A0P0WXM3_ORYSJ	unreviewed	Os06g0548000 protein	Os06g0548000	mitochondrion [GO:0005739]; L-aspartate:2-oxoglutarate aminotransferase activity [GO:0004069]; pyridoxal phosphate binding [GO:0030170]; biosynthetic process [GO:0009058]; cellular amino acid metabolic process [GO:0006520]		osa:4341252;	PF00155;
7559	LOC_Os10g39380	7.2123	2.49031	1.00756	0.00131197	0.00610138	aspartic proteinase nepenthesin-1 precursor, putative, expressed	Os10g0539200				A0A0P0XX90	A0A0P0XX90_ORYSJ	unreviewed	Os10g0539200 protein	Os10g0539200 OSNPB_100539200	extracellular region [GO:0005576]; aspartic-type endopeptidase activity [GO:0004190]; protein catabolic process [GO:0030163]; proteolysis [GO:0006508]		osa:107276470;	PF14541;PF14543;
1628	LOC_Os02g30110	8.0979	2.48392	0.8645	0.000441605	0.00236368	cytochrome P450, putative, expressed	Os02g0504000				Q6K660	Q6K660_ORYSJ	unreviewed	Putative cytochrome P450	OJ1003_F04.12	heme binding [GO:0020037]; iron ion binding [GO:0005506]; monooxygenase activity [GO:0004497]; oxidoreductase activity, acting on paired donors, with incorporation or reduction of molecular oxygen [GO:0016705]			PF00067;
6453	LOC_Os08g30910	4.05975	2.48321	1.41976	0.00736729	0.0265281	YDG/SRA domain containing protein, expressed	Os08g0400200	OsSET30, SDG710, OsSUVH10, DLN209, OsDLN209			Q0J5U8	Q0J5U8_ORYSJ	unreviewed	Os08g0400200 protein	Os08g0400200	chromosome [GO:0005694]; nucleus [GO:0005634]; histone-lysine N-methyltransferase activity [GO:0018024]; zinc ion binding [GO:0008270]	SUBCELLULAR LOCATION: Chromosome {ECO:0000256|SAAS:SAAS00563877}. Nucleus {ECO:0000256|PROSITE-ProRule:PRU00358, ECO:0000256|SAAS:SAAS00574581}.	osa:4345509;	PF05033;PF02182;PF00856;
4330	LOC_Os05g09440	121.679	2.48261	0.346458	7.33e-14	2e-12	NADP-dependent malic enzyme, chloroplast precursor, putative, expressed	Os05g0186300	OscytME2, cytME2			Q0DK77	Q0DK77_ORYSJ	unreviewed	Os05g0186300 protein	Os05g0186300	chloroplast [GO:0009507]; malate dehydrogenase (decarboxylating) (NAD+) activity [GO:0004471]; malate dehydrogenase (decarboxylating) (NADP+) activity [GO:0004473]; malic enzyme activity [GO:0004470]; metal ion binding [GO:0046872]; NAD binding [GO:0051287]; malate metabolic process [GO:0006108]; pyruvate metabolic process [GO:0006090]		osa:4338007;	PF00390;PF03949;
7326	LOC_Os10g25210	138.756	2.48226	0.227397	1.14e-28	1.41e-26	OsFBX384 - F-box domain containing protein, expressed	Os10g0391200	OsFbox550, Os_F0263			A0A5S6R8U4	A0A5S6R8U4_ORYSJ	unreviewed	Os10g0391200 protein	Os10g0391200 OSJNBb0061I18.2			osa:4348529;	PF00646;PF08268;
5592	LOC_Os07g02610	38.2741	2.48046	0.475576	1.82e-08	2.33e-07	expressed protein	Os07g0117200				Q8H5K1	Q8H5K1_ORYSJ	unreviewed	Os07g0117200 protein	Os07g0117200 OSNPB_070117200			osa:107276248;
1377	LOC_Os02g07820	368.905	2.48033	0.223658	1.39e-29	1.89e-27	DUF581 domain containing protein, expressed	Os02g0174800				Q6H502	Q6H502_ORYSJ	unreviewed	Os02g0174800 protein (cDNA clone:J023143O11, full insert sequence)	Os02g0174800 OSNPB_020174800			osa:4328466;	PF04570;
483	LOC_Os01g36560	7.45965	2.47717	1.01007	0.00126595	0.00591334	auxin-induced protein 5NG4, putative, expressed	Os01g0546100	Os5NG4			A0A0P0V3T9	A0A0P0V3T9_ORYSJ	unreviewed	WAT1-related protein (Fragment)	Os01g0546100 OSNPB_010546100	integral component of membrane [GO:0016021]; plasma membrane [GO:0005886]; transmembrane transporter activity [GO:0022857]	SUBCELLULAR LOCATION: Membrane {ECO:0000256|RuleBase:RU363077}; Multi-pass membrane protein {ECO:0000256|RuleBase:RU363077}.		PF00892;
460	LOC_Os01g33410	7.23715	2.47221	0.963646	0.00100373	0.00482851	transposon protein, putative, unclassified, expressed	Os01g0518400				Q0JMB2	RSLE4_ORYSJ	reviewed	Zinc finger BED domain-containing protein RICESLEEPER 4 (Transposase-like protein RICESLEEPER 4)	Os01g0518400 LOC_Os01g33410 B1003B09 OsJ_02008	nucleus [GO:0005634]; DNA binding [GO:0003677]; metal ion binding [GO:0046872]; protein dimerization activity [GO:0046983]; post-embryonic development [GO:0009791]	SUBCELLULAR LOCATION: Nucleus {ECO:0000250}.	osa:4323974;	PF05699;PF14372;PF02892;
4349	LOC_Os05g11620	23.1017	2.47189	0.542829	5.43e-07	5.56e-06	expressed protein	Os05g0206100	OsCEP11, CEP11			Q5W6I7	Q5W6I7_ORYSJ	unreviewed	Os05g0206100 protein	Os05g0206100 OSNPB_050206100
8015	LOC_Os11g31820	6.26767	2.46421	1.07816	0.0020286	0.00893692	expressed protein	Os11g0519500				Q2R3I5	Q2R3I5_ORYSJ	unreviewed	Uncharacterized protein	LOC_Os11g31820
5766	LOC_Os07g22070	3.94696	2.46175	1.40848	0.00763314	0.0273276	retrotransposon protein, putative, Ty3-gypsy subclass, expressed	NA	NA			Q7XKP3	Q7XKP3_ORYSJ	unreviewed	OSJNBa0032N05.6 protein	OSJNBa0032N05.6	nucleic acid binding [GO:0003676]; zinc ion binding [GO:0008270]; DNA integration [GO:0015074]			PF03732;PF17917;PF00665;PF00078;PF00098;
7626	LOC_Os10g41060	133.234	2.4599	0.290083	2.48e-18	1.17e-16	expressed protein	Os10g0560000				Q7XC71	Q7XC71_ORYSJ	unreviewed	Expressed protein (Os10g0560000 protein) (cDNA clone:J013063K07, full insert sequence)	LOC_Os10g41060 Os10g0560000 OSNPB_100560000			osa:4349374;	PF05703;PF08458;
6793	LOC_Os09g11460	67.6831	2.44946	0.350157	2.83e-13	7.15e-12	AP2 domain containing protein, expressed	Os09g0286600	Sub1C, OsERF#073, OsERF073, ERF073, OsERF73, ERF73, AP2/EREBP#122, AP2/EREBP122			Q6EN68	Q6EN68_ORYSJ	unreviewed	AP2/ERF domain protein (Os09g0286600 protein) (cDNA clone:J013007H05, full insert sequence)	Os09g0286600 OSNPB_090286600	nucleus [GO:0005634]; DNA binding [GO:0003677]; DNA-binding transcription factor activity [GO:0003700]	SUBCELLULAR LOCATION: Nucleus {ECO:0000256|SAAS:SAAS00550310}.	osa:4346628;	PF00847;
1386	LOC_Os02g08170	7.20964	2.44767	0.9923	0.0012902	0.00601738	GDU1, putative, expressed	Os02g0178300				C7IZB8	C7IZB8_ORYSJ	unreviewed	Os02g0178300 protein	Os02g0178300	integral component of membrane [GO:0016021]; regulation of amino acid export [GO:0080143]
5429	LOC_Os06g46160	134.139	2.44681	0.243328	9.16e-25	8.32e-23	expressed protein	Os06g0674100				A0A0P0WZT1	A0A0P0WZT1_ORYSJ	unreviewed	Os06g0674100 protein (Fragment)	Os06g0674100	integral component of membrane [GO:0016021]
8353	LOC_Os12g09710	58.5746	2.44639	0.325038	6.16e-15	1.95e-13	NBS-LRR disease resistance protein, putative, expressed	Os12g0198900				A3CFS9	A3CFS9_ORYSJ	unreviewed	Uncharacterized protein	OsJ_35534	ADP binding [GO:0043531]		osa:107277562;	PF00931;PF18052;
5312	LOC_Os06g39140	332.132	2.44434	0.186784	4.22e-40	1.3e-37	hemoglobin-like protein HbO, putative, expressed	Os06g0591600				Q69XE4	Q69XE4_ORYSJ	unreviewed	Os06g0591600 protein (cDNA clone:J033075H07, full insert sequence)	Os06g0591600 OSNPB_060591600	heme binding [GO:0020037]; oxygen binding [GO:0019825]		osa:4341418;	PF01152;
4106	LOC_Os04g57570	26.1061	2.43705	0.466219	2.04e-08	2.58e-07	retrotransposon protein, putative, unclassified, expressed	NA	NA			Q7XPI7	Q7XPI7_ORYSJ	unreviewed	OSJNBb0004A17.2 protein	OSJNBb0004A17.2	nucleic acid binding [GO:0003676]; zinc ion binding [GO:0008270]; DNA integration [GO:0015074]			PF13976;PF00665;PF07727;PF13966;
5898	LOC_Os07g35700	24.3271	2.4309	0.509203	1.99e-07	2.19e-06	TKL_IRAK_DUF26-lc.4 - DUF26 kinases have homology to DUF26 containing loci, expressed	Os07g0541500				Q0D5R2	CRK10_ORYSJ	reviewed	Cysteine-rich receptor-like protein kinase 10 (Cysteine-rich RLK10) (EC 2.7.11.-)	CRK10 Os07g0541500 LOC_Os07g35700 OJ1008_E09.116 OsJ_24608 P0458H05.133	integral component of membrane [GO:0016021]; plasma membrane [GO:0005886]; ATP binding [GO:0005524]; protein serine/threonine kinase activity [GO:0004674]; defense response to bacterium [GO:0042742]; protein phosphorylation [GO:0006468]	SUBCELLULAR LOCATION: Membrane {ECO:0000255}; Single-pass membrane protein {ECO:0000255}.	osa:4343501;	PF00069;PF01657;
7423	LOC_Os10g33620	18.2903	2.43006	0.572113	2.34e-06	2.13e-05	ubiquitin family protein, putative, expressed	Os10g0475900				Q7XDE7	Q7XDE7_ORYSJ	unreviewed	Os10g0475900 protein (Ubiquitin family protein, expressed) (cDNA clone:J033069L14, full insert sequence)	LOC_Os10g33620 Os10g0475900 OSNPB_100475900	cytoplasm [GO:0005737]; nucleus [GO:0005634]; protein tag [GO:0031386]; ubiquitin protein ligase binding [GO:0031625]; modification-dependent protein catabolic process [GO:0019941]; protein ubiquitination [GO:0016567]		osa:4348886;	PF00240;
3653	LOC_Os04g37700	42.8759	2.425	0.382809	2.84e-11	5.56e-10	expressed protein	Os04g0450000				Q7XV54	Q7XV54_ORYSJ	unreviewed	Os04g0450000 protein (cDNA clone:002-142-G09, full insert sequence)	Os04g0450000 OSNPB_040450000			osa:4335993;
2916	LOC_Os03g42464	1054.79	2.42326	0.160432	1.66e-52	9.61e-50	expressed protein	Os03g0622500				B7ELK0	B7ELK0_ORYSJ	unreviewed	Os03g0622500 protein (cDNA clone:J023147K22, full insert sequence)	Os03g0622500 OSNPB_030622500
1482	LOC_Os02g13510	722.483	2.41772	0.217587	1.23e-29	1.69e-27	receptor-like protein kinase 5 precursor, putative, expressed	Os02g0228300				Q6H5Y1	Q6H5Y1_ORYSJ	unreviewed	Os02g0228300 protein	Os02g0228300 OSNPB_020228300	integral component of membrane [GO:0016021]; plasma membrane [GO:0005886]; ATP binding [GO:0005524]; protein kinase activity [GO:0004672]		osa:4328793;	PF12799;PF13516;PF13855;PF00069;
1493	LOC_Os02g14190	121.72	2.41653	0.26963	3.24e-20	1.86e-18	spermidine synthase, putative, expressed	Os02g0237100	OsACL5			Q0E2H9	Q0E2H9_ORYSJ	unreviewed	Os02g0237100 protein (Putative spermine synthase)	Os02g0237100 OJ1077_A12.30 OSJNBb0006L10.5	spermine synthase activity [GO:0016768]; thermospermine synthase activity [GO:0010487]; auxin polar transport [GO:0009926]; polyamine biosynthetic process [GO:0006596]; xylem vessel member cell differentiation [GO:0048759]		osa:4328835;	PF17284;
5681	LOC_Os07g08390	140.947	2.40983	0.237886	4.45e-25	4.17e-23	plant-specific domain TIGR01615 family protein, expressed	NA	NA			C7J4H4	C7J4H4_ORYSJ	unreviewed	Os07g0181500 protein	Os07g0181500				PF04720;
5225	LOC_Os06g29844	62.581	2.40692	0.318264	4.46e-15	1.45e-13	MATE efflux family protein, putative, expressed	Os06g0494400				Q0DC22	Q0DC22_ORYSJ	unreviewed	Os06g0494400 protein (Putative ripening regulated protein)	Os06g0494400 B1423D04.35	integral component of membrane [GO:0016021]; membrane [GO:0016020]; antiporter activity [GO:0015297]; transmembrane transporter activity [GO:0022857]; xenobiotic transmembrane transporter activity [GO:0042910]		osa:4341093;	PF01554;
6986	LOC_Os09g29210	3.35652	2.4048	2.15067	0.00933213	0.0321927	purine permease, putative, expressed	Os09g0467300	OsPUP2			Q6YXG6	Q6YXG6_ORYSJ	unreviewed	Os09g0467300 protein	Os09g0467300 OSNPB_090467300	integral component of membrane [GO:0016021]; purine nucleoside transmembrane transporter activity [GO:0015211]		osa:4347320;
6987	LOC_Os09g29210	3.35652	2.4048	2.15067	0.00933213	0.0321927	purine permease, putative, expressed	Os09g0467300	OsPUP2			B7E8P8	B7E8P8_ORYSJ	unreviewed	Os09g0467300 protein (cDNA clone:001-116-G01, full insert sequence)	Os09g0467300 OSNPB_090467300	integral component of membrane [GO:0016021]; purine nucleoside transmembrane transporter activity [GO:0015211]
6623	LOC_Os08g40680	23.129	2.39179	0.557496	1.87e-06	1.73e-05	glycosyl hydrolase, putative, expressed	Os08g0518800	OsGH			Q7EZB2	Q7EZB2_ORYSJ	unreviewed	Putative chitinase	P0700D12.130 OsJ_27947 P0689E12.6	carbohydrate metabolic process [GO:0005975]		osa:4346051;	PF00704;
4860	LOC_Os05g50410	36.1992	2.39045	0.38977	1.04e-10	1.88e-09	Rad21 / Rec8 like protein, putative, expressed	Os05g0580500	OsRad21-4, REC8, OsREC8, OsRAD21-4			Q6UFU7	Q6UFU7_ORYSJ	unreviewed	Rad21-4 protein		cohesin complex [GO:0008278]; sister chromatid cohesion [GO:0007062]		osa:4339720;	PF04824;PF04825;
6885	LOC_Os09g23560	59.0964	2.39011	0.324016	1.83e-14	5.46e-13	dehydrogenase, putative, expressed	Os09g0400400	OsCAD8D			Q6ERW5	CAD8D_ORYSJ	reviewed	Probable cinnamyl alcohol dehydrogenase 8D (OsCAD8D) (EC 1.1.1.195)	CAD8D Os09g0400400 LOC_Os09g23560 OsJ_29284 P0435D08.35 P0650H04.17	cinnamyl-alcohol dehydrogenase activity [GO:0045551]; oxidoreductase activity, acting on the CH-OH group of donors, NAD or NADP as acceptor [GO:0016616]; sinapyl alcohol dehydrogenase activity [GO:0052747]; zinc ion binding [GO:0008270]; lignin biosynthetic process [GO:0009809]		osa:4346993;	PF08240;PF00107;
7915	LOC_Os11g15190	45.9928	2.38966	0.424393	2.11e-09	3.14e-08	RGH1A, putative, expressed	Os11g0258500				Q53L60	Q53L60_ORYSJ	unreviewed	NB-ARC domain containing protein, expressed	LOC_Os11g15190	ADP binding [GO:0043531]			PF00931;PF18052;
5871	LOC_Os07g34110	158.414	2.38734	0.2858	7.9e-18	3.51e-16	integral membrane protein DUF6 containing protein, expressed	Os07g0525100	OsCLIP, CLIP			Q69SA2	Q69SA2_ORYSJ	unreviewed	WAT1-related protein	Os07g0525100 OSNPB_070525100	integral component of membrane [GO:0016021]; plasma membrane [GO:0005886]; transmembrane transporter activity [GO:0022857]	SUBCELLULAR LOCATION: Membrane {ECO:0000256|RuleBase:RU363077}; Multi-pass membrane protein {ECO:0000256|RuleBase:RU363077}.	osa:4343427;	PF00892;
7013	LOC_Os09g30506	3.26751	2.38724	2.15649	0.0101358	0.0345281	EF hand family protein, expressed	Os09g0482840				A0A0P0XPF6	A0A0P0XPF6_ORYSJ	unreviewed	Os09g0482840 protein	Os09g0482840 OsJ_29798	calcium ion binding [GO:0005509]		osa:9270116;	PF13499;
7273	LOC_Os10g19919	4.85558	2.38617	1.21495	0.00468432	0.0181863	retrotransposon protein, putative, Ty3-gypsy subclass, expressed	Os10g0340301				B7EZF0	B7EZF0_ORYSJ	unreviewed	Os01g0386500 protein	Os01g0386500			osa:4325434;
1559	LOC_Os02g18930	126.692	2.38484	0.37558	2.35e-11	4.66e-10	calcineurin B, putative, expressed	Os02g0291400	OsCBL8			Q3HRN9	CNBL8_ORYSJ	reviewed	Calcineurin B-like protein 8	CBL8 Os02g0291400 LOC_Os02g18930 OJ1124_E11.15	plasma membrane [GO:0005886]; calcium ion binding [GO:0005509]	SUBCELLULAR LOCATION: Cell membrane {ECO:0000305|PubMed:18395997}; Lipid-anchor {ECO:0000305|PubMed:18395997}.	osa:107276173;	PF13499;
2854	LOC_Os03g33100	3.86622	2.38067	1.43099	0.00878345	0.0306432	retrotransposon protein, putative, unclassified, expressed	NA	NA			Q10IT7	Q10IT7_ORYSJ	unreviewed	Retrotransposon protein, putative, Ty1-copia subclass	LOC_Os03g33100	nucleic acid binding [GO:0003676]; zinc ion binding [GO:0008270]			PF13976;PF07727;
1315	LOC_Os02g04160	244.913	2.37902	0.192363	4.15e-36	9.25e-34	transcription elongation factor 1, putative, expressed	Os02g0134300	OsTEF1			A0A0P0VEJ2	A0A0P0VEJ2_ORYSJ	unreviewed	Os02g0134300 protein	Os02g0134300 OsJ_05282	transcription elongation factor complex [GO:0008023]; metal ion binding [GO:0046872]; RNA polymerase II complex binding [GO:0000993]; chromatin-mediated maintenance of transcription [GO:0048096]; transcription elongation from RNA polymerase II promoter [GO:0006368]		osa:4328219;	PF05129;
8554	LOC_Os12g36860	8.99025	2.37634	0.877486	0.000657124	0.00334083	pathogenesis-related protein 10, putative, expressed	Os12g0555300	PR10			Q2QNS9	Q2QNS9_ORYSJ	unreviewed	Os12g0555300 protein (Pathogenesis-related protein 10, putative, expressed)	LOC_Os12g36860 Os12g0555300 OSNPB_120555300	cytoplasm [GO:0005737]; nucleus [GO:0005634]; abscisic acid binding [GO:0010427]; protein phosphatase inhibitor activity [GO:0004864]; signaling receptor activity [GO:0038023]; abscisic acid-activated signaling pathway [GO:0009738]; defense response [GO:0006952]; regulation of protein serine/threonine phosphatase activity [GO:0080163]		osa:4352489;	PF00407;
5619	LOC_Os07g03990	77.3915	2.37388	0.311994	3.06e-15	1.01e-13	leucine-rich repeat family protein, putative, expressed	NA	NA			Q8H4J0	Q8H4J0_ORYSJ	unreviewed	Protein kinase domain-containing protein	OJ1606_D04.114 OsJ_22984	integral component of membrane [GO:0016021]; ATP binding [GO:0005524]; protein serine/threonine kinase activity [GO:0004674]			PF00560;PF13855;PF08263;PF00069;
2013	LOC_Os02g50805	321.672	2.37373	0.180689	2.33e-40	7.28e-38	transposon protein, putative, CACTA, En/Spm sub-class, expressed	NA	NA			A0A0P0W0W1	A0A0P0W0W1_ORYSJ	unreviewed	Os03g0643050 protein (Fragment)	Os03g0643050 OSNPB_030643050				PF13359;
6757	LOC_Os09g04960	26.2198	2.37351	0.458409	2.67e-08	3.34e-07	retrotransposon protein, putative, unclassified, expressed	Os09g0135100				Q2R3G0	Q2R3G0_ORYSJ	unreviewed	Retrotransposon protein, putative, unclassified	LOC_Os11g32060	aspartic-type endopeptidase activity [GO:0004190]; nucleic acid binding [GO:0003676]; DNA integration [GO:0015074]			PF03732;PF17919;PF00665;PF00078;
8111	LOC_Os11g40810	24.7531	2.37338	0.67559	4.14e-05	0.000289069	receptor kinase, putative, expressed	NA	NA			Q2R102	Q2R102_ORYSJ	unreviewed	Leucine Rich Repeat family protein, expressed	LOC_Os11g40810	integral component of membrane [GO:0016021]; ATP binding [GO:0005524]; protein kinase activity [GO:0004672]			PF13855;PF00069;
2898	LOC_Os03g40194	61.7733	2.3732	0.327	4.88e-14	1.37e-12	disease resistance RPP13-like protein 1, putative, expressed	Os03g0599000				C7J081	C7J081_ORYSJ	unreviewed	Os03g0599000 protein	Os03g0599000 OSNPB_030599000	ADP binding [GO:0043531]			PF00931;
3067	LOC_Os03g51490	15.8868	2.37076	0.655198	3.09e-05	0.000222214	expressed protein	Os03g0724800				Q0DNZ9	Q0DNZ9_ORYSJ	unreviewed	Os03g0724800 protein (Fragment)	Os03g0724800				PF07762;
4532	LOC_Os05g33570	658.131	2.37011	0.223574	3.15e-27	3.45e-25	pyruvate, phosphate dikinase, chloroplast precursor, putative, expressed	Os05g0405000	FLO4-4, flo4, flo4-2, flo4-3, ppdk, OsPPDK, PPDK1, CPDK1, PPDKB, OsPPDKB, cyOsPPDKB, OsPBDK, PBDK, osppdkb, PPD			Q6AVA8	PPDK1_ORYSJ	reviewed	Pyruvate, phosphate dikinase 1, chloroplastic (EC 2.7.9.1) (OsPPDKB) (Pyruvate, orthophosphate dikinase 1)	PPDK1 CPDK1 PPDKB Os05g0405000 LOC_Os05g33570 OJ1174_H11.5 OsJ_017742	chloroplast [GO:0009507]; ATP binding [GO:0005524]; kinase activity [GO:0016301]; metal ion binding [GO:0046872]; pyruvate, phosphate dikinase activity [GO:0050242]; photosynthesis [GO:0015979]; pyruvate metabolic process [GO:0006090]	SUBCELLULAR LOCATION: Plastid, chloroplast {ECO:0000269|PubMed:9278162}. Cytoplasm {ECO:0000269|PubMed:9278162}. Note=Isoform 1 is targeted to the chloroplast while isoform 2 is found in the cytoplasm.	osa:4338750;	PF00391;PF02896;PF01326;
4533	LOC_Os05g33570	658.131	2.37011	0.223574	3.15e-27	3.45e-25	pyruvate, phosphate dikinase, chloroplast precursor, putative, expressed	Os05g0405000	FLO4-4, flo4, flo4-2, flo4-3, ppdk, OsPPDK, PPDK1, CPDK1, PPDKB, OsPPDKB, cyOsPPDKB, OsPBDK, PBDK, osppdkb, PPD			A0A5H2Q5Q4	A0A5H2Q5Q4_ORYSJ	unreviewed	Pyruvate, phosphate dikinase (EC 2.7.9.1)	PPDK1	kinase activity [GO:0016301]			PF00391;PF02896;PF01326;
1141	LOC_Os01g69190	9.70723	2.36958	0.785398	0.000274012	0.00154733	regulatory protein, putative, expressed	Os01g0921000				Q8RUF2	Q8RUF2_ORYSJ	unreviewed	OJ1485_B09.2 protein (Os01g0921000 protein) (cDNA clone:J023113H16, full insert sequence)	OJ1485_B09.2 Os01g0921000 OSNPB_010921000	integral component of membrane [GO:0016021]		osa:4327746;	PF03407;
5387	LOC_Os06g44170	89.3353	2.36596	0.304506	8.91e-16	3.19e-14	NAD dependent epimerase/dehydratase family protein, putative, expressed	Os06g0651000	DHFR			A3BE48	A3BE48_ORYSJ	unreviewed	Epimerase domain-containing protein	OsJ_22181	catalytic activity [GO:0003824]; coenzyme binding [GO:0050662]		osa:4341689;	PF01370;
5388	LOC_Os06g44170	89.3353	2.36596	0.304506	8.91e-16	3.19e-14	NAD dependent epimerase/dehydratase family protein, putative, expressed	Os06g0651000	DHFR			Q67UQ3	Q67UQ3_ORYSJ	unreviewed	NADPH HC toxin reductase-like	P0453H04.35
8010	LOC_Os11g31530	9.91289	2.36411	1.06709	0.00197882	0.00874771	BRASSINOSTEROID INSENSITIVE 1-associated receptor kinase 1 precursor, putative, expressed	Os11g0514400	OsBDG1, BDG1			A0A0P0Y2U8	A0A0P0Y2U8_ORYSJ	unreviewed	Os11g0514400 protein	Os11g0514400 OSNPB_110514400	plasma membrane [GO:0005886]; transmembrane receptor protein serine/threonine kinase activity [GO:0004675]; protein phosphorylation [GO:0006468]		osa:4350583;	PF13855;PF08263;
894	LOC_Os01g58970	141.575	2.36229	0.263386	3.29e-20	1.87e-18	cytochrome P450, putative, expressed	Os01g0803900	OsCYP94D11			C7IXK5	C7IXK5_ORYSJ	unreviewed	Os01g0803900 protein	Os01g0803900	integral component of membrane [GO:0016021]; heme binding [GO:0020037]; iron ion binding [GO:0005506]; monooxygenase activity [GO:0004497]; oxidoreductase activity, acting on paired donors, with incorporation or reduction of molecular oxygen [GO:0016705]		osa:9269416;	PF00067;
4344	LOC_Os05g10940	150.915	2.36069	0.255836	3.48e-21	2.19e-19	metal cation transporter, putative, expressed	Os05g0198400	OsZIP7			Q6L8F7	ZIP7_ORYSJ	reviewed	Zinc transporter 7 (ZRT/IRT-like protein 7) (OsZIP7)	ZIP7 ZIP3 ZIP7a Os05g0198400 LOC_Os05g10940 OsJ_17459 OSJNBa0007C23.6	integral component of membrane [GO:0016021]; membrane [GO:0016020]; plasma membrane [GO:0005886]; zinc ion transmembrane transporter activity [GO:0005385]; zinc ion transmembrane transport [GO:0071577]	SUBCELLULAR LOCATION: Cell membrane {ECO:0000305}; Multi-pass membrane protein {ECO:0000305}.	osa:4338051;	PF02535;
3411	LOC_Os04g03860	36.4574	2.35996	0.443259	1.08e-08	1.43e-07	expressed protein	Os04g0127800	OsMED15_1, MED15_1, OsKIX_3, KIX_3			A0A0P0W677	A0A0P0W677_ORYSJ	unreviewed	OSJNBa0027H09.3 protein (Os04g0127800 protein)	Os04g0127800 OSJNBa0027H09.3	chromatin DNA binding [GO:0031490]; transcription coregulator activity [GO:0003712]; regulation of transcription, DNA-templated [GO:0006355]			PF16987;
7768	LOC_Os11g04860	119.125	2.35808	0.260509	1.81e-20	1.06e-18	anthocyanin 5-O-glucosyltransferase, putative, expressed	Os11g0145200	OsUGT75E1			Q0IUP1	Q0IUP1_ORYSJ	unreviewed	Os11g0145200 protein	Os11g0145200 OsJ_32945	intracellular membrane-bounded organelle [GO:0043231]; transferase activity, transferring hexosyl groups [GO:0016758]; UDP-glycosyltransferase activity [GO:0008194]		osa:4349754;	PF00201;
2864	LOC_Os03g36830	4.74616	2.35736	1.23501	0.00533586	0.0202758	expressed protein	Os03g0565900				C7J025	C7J025_ORYSJ	unreviewed	Os03g0565900 protein	Os03g0565900			osa:9267012;	PF10536;
1418	LOC_Os02g09850	32.2039	2.35222	0.525978	7.6e-07	7.54e-06	expressed protein	Os02g0191800				A0A0N7KEU7	A0A0N7KEU7_ORYSJ	unreviewed	Os02g0191800 protein	Os02g0191800	integral component of membrane [GO:0016021]; regulation of amino acid export [GO:0080143]		osa:4328581;
2653	LOC_Os03g19180	10.919	2.34947	0.800887	0.000328138	0.0018188	GCRP8 - Glycine and cysteine rich family protein precursor, putative, expressed	NA	NA			A3AH49	A3AH49_ORYSJ	unreviewed	Uncharacterized protein	OsJ_10542
4390	LOC_Os05g17604	465.411	2.33133	0.265952	2.06e-19	1.09e-17	SHR5-receptor-like kinase, putative, expressed	Os05g0261700				A0A0P0WJV8	A0A0P0WJV8_ORYSJ	unreviewed	Os05g0263100 protein	Os05g0263100 OSNPB_050263100	integral component of membrane [GO:0016021]; plasma membrane [GO:0005886]; ATP binding [GO:0005524]; protein serine/threonine kinase activity [GO:0004674]; protein autophosphorylation [GO:0046777]			PF11721;PF00069;
4391	LOC_Os05g17604	465.411	2.33133	0.265952	2.06e-19	1.09e-17	SHR5-receptor-like kinase, putative, expressed	Os05g0261700				B9FNJ4	B9FNJ4_ORYSJ	unreviewed	Protein kinase domain-containing protein	OsJ_17838	integral component of membrane [GO:0016021]; ATP binding [GO:0005524]; protein kinase activity [GO:0004672]			PF11721;PF07714;
346	LOC_Os01g19260	52.8739	2.3251	0.352068	4.84e-12	1.05e-10	ATPase, putative, expressed	Os01g0297200				Q0JNF6	Q0JNF6_ORYSJ	unreviewed	AAA-type ATPase-like (Os01g0297200 protein)	Os01g0297200 OSJNBa0025P13.20	integral component of membrane [GO:0016021]; ATP binding [GO:0005524]		osa:4326724;	PF00004;PF14363;
7063	LOC_Os09g33680	945.949	2.30842	0.143778	5.73e-59	4.98e-56	Os9bglu31 - beta-glucosidase, dhurrinase, similar to G. max hydroxyisourate hydrolase, expressed	Os09g0511600	Os9bglu31, Os9BGlu31			B7F7K7	BGL31_ORYSJ	reviewed	Beta-glucosidase 31 (Os9bglu31) (EC 3.2.1.21)	BGLU31 Os09g0511600 LOC_Os09g33680 OsJ_29984	beta-glucosidase activity [GO:0008422]; scopolin beta-glucosidase activity [GO:0102483]; carbohydrate metabolic process [GO:0005975]		osa:4347545;	PF00232;
5612	LOC_Os07g03810	31.6872	2.30725	0.430446	1.03e-08	1.37e-07	lectin-like receptor kinase 7, putative, expressed	Os07g0130100	RLK			Q6YT58	Q6YT58_ORYSJ	unreviewed	Os07g0130100 protein (Putative receptor kinase Lecrk)	Os07g0130100 OsJ_22966 OSJNBa0088O14.27	integral component of membrane [GO:0016021]; plasma membrane [GO:0005886]; ATP binding [GO:0005524]; carbohydrate binding [GO:0030246]; transmembrane receptor protein serine/threonine kinase activity [GO:0004675]; defense response [GO:0006952]; defense response to bacterium [GO:0042742]; defense response to oomycetes [GO:0002229]			PF00139;PF00069;
3581	LOC_Os04g33115	3.88372	2.30688	2.71412	0.0105559	0.0357203	NA	Os04g0404000				NA	NA	NA	NA	NA	NA	NA	NA	NA
6055	LOC_Os07g43950	143.387	2.3039	0.221158	2.44e-26	2.49e-24	RNA recognition motif containing protein, putative, expressed	Os07g0633200	Os-SCL25, OsSCL25			B9FUE7	B9FUE7_ORYSJ	unreviewed	RRM domain-containing protein	OsJ_25252	RNA binding [GO:0003723]			PF09366;PF00076;
6423	LOC_Os08g26320	4.8631	2.30332	1.30115	0.00646991	0.0237468	hypothetical protein	NA	NA			Q6ZDT6	Q6ZDT6_ORYSJ	unreviewed	Uncharacterized protein	OsJ_27009 P0475C12.30
6655	LOC_Os08g42400	472.57	2.30182	0.200356	1.7e-31	2.85e-29	no apical meristem protein, putative, expressed	Os08g0535800	ONAC005, ONAC5, ONAC035, ONAC35, ONAC046, ONAC46, ONAC052, ONAC52			Q6Z1G9	Q6Z1G9_ORYSJ	unreviewed	NAC4 protein (Os08g0535800 protein) (cDNA clone:001-038-H11, full insert sequence) (cDNA clone:006-311-A02, full insert sequence) (cDNA clone:J013160K11, full insert sequence)	Os08g0535800 OSNPB_080535800	nucleus [GO:0005634]; DNA binding [GO:0003677]; regulation of transcription, DNA-templated [GO:0006355]	SUBCELLULAR LOCATION: Nucleus {ECO:0000256|SAAS:SAAS01215438}.	osa:4346157;	PF02365;
1911	LOC_Os02g46460	158.116	2.30023	0.233915	9.53e-24	7.75e-22	peptide transporter PTR2, putative, expressed	Os02g0689900	OsNRT1.5A			Q6ZGY3	Q6ZGY3_ORYSJ	unreviewed	Os02g0689900 protein	Os02g0689900 OSNPB_020689900	integral component of membrane [GO:0016021]; transmembrane transporter activity [GO:0022857]		osa:4330372;	PF00854;
1917	LOC_Os02g46690	39.2331	2.29731	0.402874	1.4e-09	2.14e-08	OsFBD8 - F-box and FBD domain containing protein, expressed	Os02g0694100	OsFbox106, Os_F0496			Q6Z891	Q6Z891_ORYSJ	unreviewed	Os02g0694100 protein	Os02g0694100 OSNPB_020694100			osa:4330391;	PF00646;
3469	LOC_Os04g13220	122.584	2.29577	0.249201	4.12e-21	2.58e-19	ABC transporter family protein, putative, expressed	Os04g0209300	OsABCC10, OsMRP10			Q0JES1	Q0JES1_ORYSJ	unreviewed	OSJNBb0022P19.1 protein (Os04g0209300 protein)	Os04g0209300 OSJNBb0022P19.1	integral component of membrane [GO:0016021]; membrane [GO:0016020]; plant-type vacuole [GO:0000325]; vacuolar membrane [GO:0005774]; ATP binding [GO:0005524]; ATPase activity [GO:0016887]; ATPase-coupled transmembrane transporter activity [GO:0042626]; transmembrane transport [GO:0055085]		osa:4335177;	PF00664;PF00005;
5304	LOC_Os06g38660	145.817	2.29513	0.45538	4.48e-08	5.41e-07	expressed protein	Os06g0586000				Q0DBA8	Q0DBA8_ORYSJ	unreviewed	Os06g0586000 protein	Os06g0586000 B1047H05.13 OsJ_21814
2010	LOC_Os02g50700	117.649	2.29421	0.236089	3.03e-23	2.36e-21	expressed protein	Os02g0740500				Q6Z7T0	Q6Z7T0_ORYSJ	unreviewed	Os02g0740500 protein	Os02g0740500 OsJ_08325 P0516G10.14			osa:4330678;
3838	LOC_Os04g45834	67.2334	2.29227	0.312703	2.93e-14	8.47e-13	DUF584 domain containing protein, putative, expressed	Os04g0542000	OsS40-5			A0A0P0WD51	A0A0P0WD51_ORYSJ	unreviewed	OSJNBb0103I08.8 protein	OSJNBb0103I08.8			osa:9272389;	PF04520;
1670	LOC_Os02g33060	21.1832	2.28767	0.506761	7.85e-07	7.75e-06	expressed protein	Os02g0533700				Q6EPY4	Q6EPY4_ORYSJ	unreviewed	Os02g0533700 protein	Os02g0533700 OSNPB_020533700			osa:4329558;
3644	LOC_Os04g36730	102.792	2.28573	0.282316	6.63e-17	2.66e-15	PHD finger protein, putative, expressed	Os04g0444900				Q7XUW3	ALFL4_ORYSJ	reviewed	PHD finger protein ALFIN-LIKE 4	Os04g0444900 LOC_Os04g36730 OsJ_14937 OSJNBa0027P08.7	nucleus [GO:0005634]; histone binding [GO:0042393]; metal ion binding [GO:0046872]; chromatin organization [GO:0006325]; regulation of transcription, DNA-templated [GO:0006355]	SUBCELLULAR LOCATION: Nucleus {ECO:0000250}.	osa:4335954;	PF12165;PF00628;
4226	LOC_Os05g03160	4.88951	2.28156	1.33792	0.00710568	0.0257246	DUF260 domain containing protein, putative, expressed	Os05g0123000				A0A0P0WHL0	A0A0P0WHL0_ORYSJ	unreviewed	Putatvie LOB domain protein	OJ1729_E02.9				PF03195;
8008	LOC_Os11g31480	66.8423	2.27502	0.42211	7.78e-09	1.06e-07	ATP binding protein, putative, expressed	Os11g0514000	Stvb(St2), St2, Stvb, Stv2			Q2R3L9	Q2R3L9_ORYSJ	unreviewed	Expressed protein	LOC_Os11g31480
119	LOC_Os01g06660	626.532	2.27011	0.212663	1.52e-27	1.73e-25	thiamine pyrophosphate enzyme, C-terminal TPP binding domain containing protein, expressed	Os01g0160100				A2ZPI7	A2ZPI7_ORYSJ	unreviewed	Os01g0160100 protein (Putative pyruvate decarboxylase)	Os01g0160100 OsJ_00466 P0041E11.26	cytosol [GO:0005829]; carboxy-lyase activity [GO:0016831]; magnesium ion binding [GO:0000287]; thiamine pyrophosphate binding [GO:0030976]		osa:4324066;	PF02775;PF00205;PF02776;
2869	LOC_Os03g37394	2.76744	2.26872	1.94488	0.0112479	0.037669	retrotransposon protein, putative, unclassified, expressed	NA	NA			Q75LU1	Q75LU1_ORYSJ	unreviewed	Putative endonuclease/exonuclease/phosphatase family protein	OSJNBb0015I21.7	endonuclease activity [GO:0004519]; exonuclease activity [GO:0004527]			PF14111;PF03372;PF00078;
2202	LOC_Os02g58150	9.47979	2.26802	0.832782	0.00064566	0.00329287	expressed protein	Os02g0828200				B9F4N0	B9F4N0_ORYSJ	unreviewed	Uncharacterized protein	OsJ_08971
352	LOC_Os01g19694	27.0664	2.26777	0.535472	2.55e-06	2.31e-05	Homeobox domain containing protein, expressed	Os01g0302500	OsH6, HOS16			Q9FP29	KNOS1_ORYSJ	reviewed	Homeobox protein knotted-1-like 1 (Homeobox protein HOS16) (Homeobox protein OSH6)	OSH6 HOS16 Os01g0302500 LOC_Os01g19694 B1146F03.18 P0035H10.13	nucleus [GO:0005634]; sequence-specific DNA binding [GO:0043565]; regulation of transcription, DNA-templated [GO:0006355]	SUBCELLULAR LOCATION: Nucleus {ECO:0000255|PROSITE-ProRule:PRU00108, ECO:0000255|PROSITE-ProRule:PRU00559}.	osa:4325788;	PF03789;PF05920;PF03790;PF03791;
3236	LOC_Os03g58890	316.946	2.26636	0.297389	2.73e-15	9.14e-14	oxidoreductase, putative, expressed	Os03g0803500				Q84T04	Q84T04_ORYSJ	unreviewed	Os03g0803500 protein (Oxidoreductase, 2OG-Fe oxygenase family protein, putative, expressed) (cDNA clone:006-203-E11, full insert sequence)	LOC_Os03g58890 Os03g0803500 OSNPB_030803500	endoplasmic reticulum [GO:0005783]; iron ion binding [GO:0005506]; L-ascorbic acid binding [GO:0031418]; oxidoreductase activity, acting on paired donors, with incorporation or reduction of molecular oxygen [GO:0016705]; peptidyl-proline hydroxylation to 4-hydroxy-L-proline [GO:0018401]		osa:4334477;	PF13640;
4463	LOC_Os05g29810	25.5552	2.26399	0.483728	3.49e-07	3.69e-06	AP2 domain containing protein, expressed	Os05g0361700	OsERF#061, OsERF061, OsERF61, AP2/EREBP#093, AP2/EREBP93			Q6L4M2	Q6L4M2_ORYSJ	unreviewed	Os05g0361700 protein (cDNA clone:J023031H12, full insert sequence)	Os05g0361700 OSNPB_050361700	nucleus [GO:0005634]; DNA binding [GO:0003677]; DNA-binding transcription factor activity [GO:0003700]	SUBCELLULAR LOCATION: Nucleus {ECO:0000256|SAAS:SAAS00550310}.	osa:4338539;	PF00847;
1190	LOC_Os01g71700	26.0661	2.26156	0.508266	9.65e-07	9.43e-06	amino acid permease family protein, putative, expressed	Os01g0945100	OsBAT2			B9EWE8	B9EWE8_ORYSJ	unreviewed	Putative GABA-specific permease	OsJ_04734 P0614D08.26	integral component of membrane [GO:0016021]; transmembrane transporter activity [GO:0022857]		osa:4326066;	PF13520;
6990	LOC_Os09g29460	141.359	2.25259	0.32071	2.6e-13	6.58e-12	homeobox associated leucine zipper, putative, expressed	Os09g0470500	Oshox4, OsHox4			Q6K498	HOX4_ORYSJ	reviewed	Homeobox-leucine zipper protein HOX4 (HD-ZIP protein HOX4) (Homeodomain transcription factor HOX4) (OsHox4)	HOX4 Os09g0470500 LOC_Os09g29460 OJ1595_D08.21	nucleus [GO:0005634]; DNA-binding transcription factor activity [GO:0003700]; sequence-specific DNA binding [GO:0043565]; positive regulation of transcription, DNA-templated [GO:0045893]	SUBCELLULAR LOCATION: Nucleus {ECO:0000255|PROSITE-ProRule:PRU00108, ECO:0000269|PubMed:18049796}.	osa:4347333;	PF02183;PF00046;
607	LOC_Os01g45640	156.785	2.25167	0.227622	5.77e-24	4.81e-22	tat pathway signal sequence family protein, expressed	Os01g0644000				Q5VP66	Q5VP66_ORYSJ	unreviewed	Os01g0644000 protein (cDNA clone:001-122-B07, full insert sequence) (cDNA clone:J033147D17, full insert sequence)	Os01g0644000 OSNPB_010644000			osa:4326569;
7897	LOC_Os11g14040	34.1816	2.25053	0.406708	4.06e-09	5.77e-08	glutathione S-transferase, N-terminal domain containing protein, expressed	Os11g0245100	OsGSTZ4			Q53M09	Q53M09_ORYSJ	unreviewed	Glutathione S-transferase zeta class, putative (Os11g0245100 protein) (cDNA, clone: J065182P11, full insert sequence)	LOC_Os11g14040 Os11g0245100 OSNPB_110245100	cytoplasm [GO:0005737]; glutathione transferase activity [GO:0004364]; maleylacetoacetate isomerase activity [GO:0016034]; aromatic amino acid family metabolic process [GO:0009072]; glutathione metabolic process [GO:0006749]		osa:9266826;	PF14497;PF02798;
7997	LOC_Os11g29630	88.1701	2.25018	0.284616	3.14e-16	1.18e-14	expressed protein	Os11g0487100				C7J8M5	C7J8M5_ORYSJ	unreviewed	Os11g0487100 protein	Os11g0487100 OSNPB_110487100			osa:9271875;
2124	LOC_Os02g55100	4.7661	2.24896	1.26737	0.00647831	0.0237704	expressed protein	NA	NA			Q6K676	Q6K676_ORYSJ	unreviewed	Uncharacterized protein P0700F06.29	P0700F06.29
1184	LOC_Os01g71270	47.1982	2.24802	0.394643	1.35e-09	2.07e-08	eukaryotic peptide chain release factor subunit 1-1, putative, expressed	Os01g0939500				Q8RV12	Q8RV12_ORYSJ	unreviewed	Os01g0939500 protein	Os01g0939500 OSNPB_010939500	cytosol [GO:0005829]; translation release factor complex [GO:0018444]; sequence-specific mRNA binding [GO:1990825]; translation release factor activity, codon specific [GO:0016149]; cytoplasmic translational termination [GO:0002184]		osa:4326511;	PF03463;PF03464;PF03465;
4496	LOC_Os05g31740	8.36414	2.24657	0.859972	0.000917291	0.00446746	cytochrome P450 86A2, putative, expressed	Os05g0382500	OsCYP94E3			Q6L4C7	Q6L4C7_ORYSJ	unreviewed	Os05g0382500 protein (cDNA clone:002-121-G02, full insert sequence)	Os05g0382500 OSNPB_050382500	heme binding [GO:0020037]; iron ion binding [GO:0005506]; monooxygenase activity [GO:0004497]; oxidoreductase activity, acting on paired donors, with incorporation or reduction of molecular oxygen [GO:0016705]		osa:9272160;	PF00067;
5608	LOC_Os07g03600	16.0683	2.24639	0.687787	0.000111295	0.000692627	SCP-like extracellular protein, expressed	Os07g0127700	PR1b			Q6YSH0	Q6YSH0_ORYSJ	unreviewed	Os07g0127700 protein (Putative pathogenesis-related protein)	Os07g0127700 B1249D05.22 OJ1212_C12.43	extracellular region [GO:0005576]		osa:4342315;	PF00188;
23	LOC_Os01g01710	967.9	2.23828	0.244168	5.63e-21	3.49e-19	1-deoxy-D-xylulose 5-phosphate reductoisomerase, chloroplast precursor, putative, expressed	Os01g0106900	OsDXR, DXR, OsIspC, IspC			Q8W250	DXR_ORYSJ	reviewed	1-deoxy-D-xylulose 5-phosphate reductoisomerase, chloroplastic (1-deoxyxylulose-5-phosphate reductoisomerase) (DXP reductoisomerase) (EC 1.1.1.267) (2-C-methyl-D-erythritol 4-phosphate synthase)	DXR Os01g0106900 LOC_Os01g01710 OsJ_00058 P0005A05.24 P0482C06.2	chloroplast stroma [GO:0009570]; 1-deoxy-D-xylulose-5-phosphate reductoisomerase activity [GO:0030604]; manganese ion binding [GO:0030145]; NADPH binding [GO:0070402]; isopentenyl diphosphate biosynthetic process, methylerythritol 4-phosphate pathway involved in terpenoid biosynthetic process [GO:0051484]; response to cadmium ion [GO:0046686]	SUBCELLULAR LOCATION: Plastid, chloroplast stroma {ECO:0000250}.	osa:4326153;	PF08436;PF02670;PF13288;
5469	LOC_Os06g47850	595.41	2.23468	0.221734	8.03e-25	7.35e-23	zinc finger family protein, putative, expressed	Os06g0693600				A0A0P0X0A8	A0A0P0X0A8_ORYSJ	unreviewed	Os06g0693600 protein	Os06g0693600 OSNPB_060693600
2093	LOC_Os02g53620	47.4753	2.23359	0.346401	1.44e-11	2.93e-10	nuclear transcription factor Y subunit, putative, expressed	Os02g0776400	OsHAP2K, NF-YA11, OsNF-YA11, NFYA11			A0A0N7KG67	A0A0N7KG67_ORYSJ	unreviewed	Os02g0776400 protein	Os02g0776400 OSNPB_020776400	nucleus [GO:0005634]; DNA-binding transcription factor activity [GO:0003700]; RNA polymerase II cis-regulatory region sequence-specific DNA binding [GO:0000978]; regulation of transcription, DNA-templated [GO:0006355]		osa:9270863;	PF02045;
7673	LOC_Os10g42610	93.0903	2.23223	0.429604	2.04e-08	2.59e-07	expressed protein	Os10g0576600				Q336P1	Q336P1_ORYSJ	unreviewed	Expressed protein (Os10g0576600 protein) (cDNA clone:001-009-A12, full insert sequence)	LOC_Os10g42610 Os10g0576600 OSNPB_100576600
7674	LOC_Os10g42610	93.0903	2.23223	0.429604	2.04e-08	2.59e-07	expressed protein	Os10g0576600				Q7XBV4	Q7XBV4_ORYSJ	unreviewed	Expressed protein (Os10g0576600 protein) (cDNA clone:006-203-D09, full insert sequence) (cDNA clone:006-302-C07, full insert sequence) (cDNA clone:006-311-C05, full insert sequence) (cDNA clone:J023113L04, full insert sequence)	LOC_Os10g42610 Os10g0576600 OSNPB_100576600			osa:4349493;
3032	LOC_Os03g50150	41.262	2.22805	0.36779	1.71e-10	3e-09	NB-ARC domain containing protein, expressed	Os03g0709200				C7IZF5	C7IZF5_ORYSJ	unreviewed	Os03g0709200 protein	Os03g0709200	ADP binding [GO:0043531]		osa:9269265;	PF00931;PF18052;
576	LOC_Os01g43650	24.2375	2.22529	0.509522	1.51e-06	1.43e-05	WRKY11, expressed	Os01g0626400	OsWRKY11, Dlf1, OsWRKY11.1, OsWRKY11.2			Q9FE35	Q9FE35_ORYSJ	unreviewed	Os01g0626400 protein (WRKY transcription factor) (WRKY transcription factor 11) (WRKY16) (cDNA clone:002-150-E09, full insert sequence)	WRKY11 Os01g0626400 OSNPB_010626400	nucleus [GO:0005634]; DNA-binding transcription factor activity [GO:0003700]; sequence-specific DNA binding [GO:0043565]	SUBCELLULAR LOCATION: Nucleus {ECO:0000256|SAAS:SAAS00875356}.	osa:4326690;	PF03106;
6414	LOC_Os08g25720	3586.84	2.2244	0.209379	2.57e-27	2.85e-25	pyrophosphate--fructose 6-phosphate 1-phosphotransferase subunit alpha, putative, expressed	Os08g0345700	OsPFPA3, OsPFP1a3, PFP1a3			B9G0G9	B9G0G9_ORYSJ	unreviewed	Os08g0345700 protein (Putative pyrophosphate-dependent phosphofructokinase alpha subunit)	P0410E11.122 Os08g0345700 OsJ_26990	cytosol [GO:0005829]; 6-phosphofructokinase activity [GO:0003872]; ATP binding [GO:0005524]; diphosphate-fructose-6-phosphate 1-phosphotransferase activity [GO:0047334]; metal ion binding [GO:0046872]; phosphofructokinase activity [GO:0008443]; photosynthesis [GO:0015979]; response to glucose [GO:0009749]		osa:4345338;	PF00365;
4796	LOC_Os05g47490	43.2181	2.22293	0.393299	1.88e-09	2.82e-08	MDR-like ABC transporter, putative, expressed	Os05g0548300	OsABCB18, OsPGP18, OsABCB18_1, OsABCB18_2			B9FLG1	B9FLG1_ORYSJ	unreviewed	Uncharacterized protein	OsJ_19431	integral component of membrane [GO:0016021]; ATP binding [GO:0005524]; ATPase activity [GO:0016887]; ATPase-coupled transmembrane transporter activity [GO:0042626]			PF00664;PF00005;
7146	LOC_Os09g39120	15.3154	2.22211	0.617302	3.69e-05	0.000260915	thiol protease SEN102 precursor, putative, expressed	Os09g0564700				A3C1K0	A3C1K0_ORYSJ	unreviewed	Uncharacterized protein	OsJ_30362	cysteine-type peptidase activity [GO:0008234]		osa:107275682;	PF08246;PF00112;
3489	LOC_Os04g19114	11.5537	2.22205	0.877071	0.00102597	0.00491835	retrotransposon protein, putative, Ty3-gypsy subclass, expressed	NA	NA			Q7F9J4	Q7F9J4_ORYSJ	unreviewed	OSJNBa0013A04.10 protein	OSJNBa0013A04.10	nucleic acid binding [GO:0003676]; RNA-DNA hybrid ribonuclease activity [GO:0004523]			PF03732;PF17919;PF00078;PF13456;
5702	LOC_Os07g09310	71.9077	2.22121	0.358041	6.13e-11	1.15e-09	thioredoxin, putative, expressed	Os07g0190800	OsTRXh5, OsTrx24, Os4, OsTrxh4			Q6Z4I3	TRH21_ORYSJ	reviewed	Thioredoxin H2-1 (OsTrxh2-1) (OsTrx24)	Os07g0190800 LOC_Os07g09310 OsJ_23401 OSJNBb0003E08.27	cell [GO:0005623]; cytoplasm [GO:0005737]; cell redox homeostasis [GO:0045454]; oxidation-reduction process [GO:0055114]	SUBCELLULAR LOCATION: Cytoplasm {ECO:0000250}.	osa:4342618;	PF00085;
8174	LOC_Os11g47500	19.2154	2.22039	0.733481	0.000233446	0.00134337	glycosyl hydrolase, putative, expressed	Os11g0700900	C10923			Q53NK5	Q53NK5_ORYSJ	unreviewed	Chitinase III C10923-rice (EC 3.2.1.14)	OsJ_34834	extracellular region [GO:0005576]; chitinase activity [GO:0004568]; xylan catabolic process [GO:0045493]		osa:4351185;	PF00704;
8083	LOC_Os11g37860	16.3679	2.21909	0.668778	9.9e-05	0.000625146	stripe rust resistance protein Yr10, putative, expressed	Os11g0590700				Q0IRX1	Q0IRX1_ORYSJ	unreviewed	Os11g0590700 protein	Os11g0590700	ADP binding [GO:0043531]			PF00931;PF18052;
6166	LOC_Os07g48980	44.8294	2.21845	0.458719	1.56e-07	1.75e-06	nicotianamine synthase, putative, expressed	Os07g0689600	OsNAS3			H9BE60	H9BE60_ORYSJ	unreviewed	Nicotianamine synthase 3 (EC 2.5.1.43)		nicotianamine synthase activity [GO:0030410]; nicotianamine biosynthetic process [GO:0030418]		osa:4344361;	PF03059;
2909	LOC_Os03g41438	8.34216	2.21814	0.868305	0.00106011	0.00506468	serpin domain containing protein, putative, expressed	Os03g0610800	OsSRP-FRS, OrysaZxb			Q10GX0	SPZXB_ORYSJ	reviewed	Serpin-ZXB (OrysaZxb)	Os03g0610800 LOC_Os03g41438 OSJNBb0007E22.10	extracellular space [GO:0005615]; serine-type endopeptidase inhibitor activity [GO:0004867]; negative regulation of endopeptidase activity [GO:0010951]		osa:4333434;	PF00079;
158	LOC_Os01g08300	22.4914	2.21796	0.493163	8.19e-07	8.07e-06	expressed protein	Os01g0178300	OsCDT3			Q5VRU4	Q5VRU4_ORYSJ	unreviewed	Os01g0178300 protein	Os01g0178300 OsJ_00601 P0406H10.3 P0509B06.5				PF12734;
7346	LOC_Os10g26570	283.833	2.21735	0.196669	1.97e-30	2.91e-28	phosphofructokinase, putative, expressed	Os10g0405600	OsPFK10, PFK10			Q338G3	Q338G3_ORYSJ	unreviewed	ATP-dependent 6-phosphofructokinase (ATP-PFK) (Phosphofructokinase) (EC 2.7.1.11) (Phosphohexokinase)	PFK LOC_Os10g26570 Os10g0405600 OSNPB_100405600	cytoplasm [GO:0005737]; 6-phosphofructokinase activity [GO:0003872]; ATP binding [GO:0005524]; metal ion binding [GO:0046872]; fructose 6-phosphate metabolic process [GO:0006002]	SUBCELLULAR LOCATION: Cytoplasm {ECO:0000256|HAMAP-Rule:MF_03186}.	osa:4348582;	PF00365;
4806	LOC_Os05g47860	5.87418	2.21692	1.16521	0.00466064	0.0181059	expressed protein	Os05g0552000				B9FHV0	B9FHV0_ORYSJ	unreviewed	Os05g0552000 protein	Os05g0552000 OSNPB_050552000	integral component of membrane [GO:0016021]		osa:9269116;
3872	LOC_Os04g46970	50.86	2.2155	0.374484	3.68e-10	6.15e-09	glucosyltransferase, putative, expressed	Os04g0556400	OsUGT93B			Q0JB48	Q0JB48_ORYSJ	unreviewed	Os04g0556400 protein (Fragment)	Os04g0556400	transferase activity, transferring hexosyl groups [GO:0016758]			PF00201;
2871	LOC_Os03g37470	11.7478	2.21403	0.936494	0.001545	0.00704767	MATE efflux family protein, putative, expressed	Os03g0571700				Q10HY2	Q10HY2_ORYSJ	unreviewed	MATE efflux family protein, expressed	LOC_Os03g37470	integral component of membrane [GO:0016021]; antiporter activity [GO:0015297]; xenobiotic transmembrane transporter activity [GO:0042910]			PF01554;
7482	LOC_Os10g36210	10.7737	2.21371	0.721317	0.000241836	0.0013863	valyl-tRNA synthetase, putative, expressed	Os10g0506200	OsValRS3, ValRS3			Q7G2B1	Q7G2B1_ORYSJ	unreviewed	Valyl-tRNA synthetase (Valyl-tRNA synthetase, putative)	LOC_Os10g36210	cytoplasm [GO:0005737]; aminoacyl-tRNA editing activity [GO:0002161]; ATP binding [GO:0005524]; valine-tRNA ligase activity [GO:0004832]; valyl-tRNA aminoacylation [GO:0006438]			PF08264;PF00133;PF10458;
7948	LOC_Os11g19840	5.44134	2.21339	1.09998	0.00425336	0.0167758	O-methyltransferase, putative, expressed	Os11g0303600	OMT			Q53QK0	Y1103_ORYSJ	reviewed	Flavonoid O-methyltransferase-like protein Os11g0303600 (EC 2.1.1.-)	Os11g0303600 LOC_Os11g19840	O-methyltransferase activity [GO:0008171]; protein dimerization activity [GO:0046983]; S-adenosylmethionine-dependent methyltransferase activity [GO:0008757]; aromatic compound biosynthetic process [GO:0019438]; methylation [GO:0032259]			PF08100;PF00891;
3466	LOC_Os04g12960	12.3649	2.21019	0.6642	0.000104519	0.000655317	UDP-glucoronosyl/UDP-glucosyl transferase, putative, expressed	Os04g0206500				Q7XWK3	Q7XWK3_ORYSJ	unreviewed	Glycosyltransferase (EC 2.4.1.-)	Os04g0206500 OSNPB_040206500	intracellular membrane-bounded organelle [GO:0043231]; quercetin 3-O-glucosyltransferase activity [GO:0080043]; quercetin 7-O-glucosyltransferase activity [GO:0080044]; UDP-glycosyltransferase activity [GO:0008194]		osa:4335167;	PF00201;
4046	LOC_Os04g54590	71.657	2.20634	0.298246	1.71e-14	5.15e-13	expressed protein	Os04g0638700	OsPep1, Pep1, OsPROPEP1, PROPEP1			Q0J9P5	Q0J9P5_ORYSJ	unreviewed	Os04g0638700 protein (cDNA clone:001-108-D10, full insert sequence)	Os04g0638700 OSNPB_040638700			osa:4337154;
4047	LOC_Os04g54590	71.657	2.20634	0.298246	1.71e-14	5.15e-13	expressed protein	Os04g0638700	OsPep1, Pep1, OsPROPEP1, PROPEP1			Q7X6R0	Q7X6R0_ORYSJ	unreviewed	OSJNBb0003B01.4 protein (OSJNBb0034I13.24 protein)	OSJNBb0003B01.4 OSJNBb0034I13.24
4668	LOC_Os05g40290	116.208	2.20461	0.28729	1.99e-15	6.8e-14	KH domain-containing protein, putative, expressed	Os05g0481500				A0A0P0WNV4	A0A0P0WNV4_ORYSJ	unreviewed	Os05g0481500 protein	Os05g0481500	nucleus [GO:0005634]; RNA binding [GO:0003723]			PF00013;PF16544;
3453	LOC_Os04g10940	16.2647	2.1989	0.764225	0.000377689	0.00205687	expressed protein	Os04g0188433				C7J1E8	C7J1E8_ORYSJ	unreviewed	Os04g0188433 protein	Os04g0188433 OsJ_13942
2156	LOC_Os02g56460	8.7024	2.19853	1.26876	0.00534114	0.0202895	dehydrogenase, putative, expressed	Os02g0808800	OsCCR1			Q6K9A2	CCR1_ORYSJ	reviewed	Cinnamoyl-CoA reductase 1 (OsCCR1) (EC 1.2.1.44)	CCR1 Os02g0808800 LOC_Os02g56460 OJ1112_G06.14 OJ1520_C09.26 OsJ_08807	cytoplasm [GO:0005737]; cinnamoyl-CoA reductase activity [GO:0016621]; coenzyme binding [GO:0050662]; oxidoreductase activity [GO:0016491]; oxidoreductase activity, acting on the CH-OH group of donors, NAD or NADP as acceptor [GO:0016616]; defense response [GO:0006952]; lignin biosynthetic process [GO:0009809]	SUBCELLULAR LOCATION: Cytoplasm {ECO:0000269|PubMed:16380417}.	osa:4331085;	PF01370;
7530	LOC_Os10g38470	98.9945	2.19776	0.261396	5.38e-18	2.44e-16	glutathione S-transferase, putative, expressed	Os10g0528100	OsGSTU24			Q8S702	Q8S702_ORYSJ	unreviewed	Glutathione S-transferase GSTU6, putative, expressed (Os10g0528100 protein) (cDNA clone:002-142-E01, full insert sequence)	LOC_Os10g38470 Os10g0528100 OSNPB_100528100	cytoplasm [GO:0005737]; glutathione transferase activity [GO:0004364]; glutathione metabolic process [GO:0006749]			PF02798;
1675	LOC_Os02g33420	7.10502	2.19529	0.925669	0.00184837	0.00824445	ATPase, AAA family protein, expressed	Os02g0537400				Q6ETV8	Q6ETV8_ORYSJ	unreviewed	Putative endopeptidase Clp ATP-binding chain	OsJ_07035 P0508B05.20	ATP binding [GO:0005524]		osa:4329576;	PF00004;PF07724;PF17871;PF10431;
57	LOC_Os01g03390	359.58	2.19056	0.33466	6.63e-12	1.41e-10	BBTI7 - Bowman-Birk type bran trypsin inhibitor precursor, expressed	Os01g0124650	RBBI2-3			B7E9D7	B7E9D7_ORYSJ	unreviewed	Os01g0124650 protein (cDNA clone:001-125-E08, full insert sequence) (cDNA clone:J023130E04, full insert sequence)	Os01g0124650 OSNPB_010124650	extracellular region [GO:0005576]; serine-type endopeptidase inhibitor activity [GO:0004867]		osa:9267088;	PF00228;
3091	LOC_Os03g52390	382.562	2.19011	0.248308	1.29e-19	6.93e-18	PIII1 - Proteinase inhibitor II family protein precursor, expressed	Os03g0734300				Q6AVT6	Q6AVT6_ORYSJ	unreviewed	Os03g0734300 protein (Type II proteinase inhibitor family protein, expressed) (cDNA clone:001-121-H07, full insert sequence)	LOC_Os03g52390 Os03g0734300 OSNPB_030734300	serine-type endopeptidase inhibitor activity [GO:0004867]		osa:4334015;	PF02428;
5094	LOC_Os06g11812	1.9747	2.18763	4.90857	0.010825	0.0364373	wound/stress protein, putative, expressed	Os06g0221300				Q67VZ0	Q67VZ0_ORYSJ	unreviewed	Os06g0221300 protein	Os06g0221300 OSNPB_060221300			osa:4340523;	PF01477;
2604	LOC_Os03g17480	29.9445	2.18484	0.469823	4.03e-07	4.21e-06	IN2-1 protein, putative, expressed	Os03g0283200	OsGSTL1			Q10N44	IN21A_ORYSJ	reviewed	Protein IN2-1 homolog A	Os03g0283200 LOC_Os03g17480 OsJ_009979	protein glutathionylation [GO:0010731]		osa:4332456;	PF13417;
4829	LOC_Os05g48790	23.4739	2.18413	0.479412	6.71e-07	6.75e-06	expressed protein	Os05g0562000				A0A0N7KL87	A0A0N7KL87_ORYSJ	unreviewed	Os05g0562000 protein	Os05g0562000 OSNPB_050562000
4830	LOC_Os05g48790	23.4739	2.18413	0.479412	6.71e-07	6.75e-06	expressed protein	Os05g0562000				B9FLL7	B9FLL7_ORYSJ	unreviewed	Uncharacterized protein	OsJ_19541
6434	LOC_Os08g28080	15.4122	2.18237	0.649733	8.43e-05	0.000540706	coatomer subunit delta, putative, expressed	Os08g0368000				B9G0L5	B9G0L5_ORYSJ	unreviewed	Coatomer subunit delta	OsJ_27083	COPI vesicle coat [GO:0030126]; Golgi membrane [GO:0000139]; DNA binding [GO:0003677]; protein transport [GO:0015031]; retrograde vesicle-mediated transport, Golgi to endoplasmic reticulum [GO:0006890]	SUBCELLULAR LOCATION: Cytoplasm {ECO:0000256|RuleBase:RU366052}. Golgi apparatus membrane {ECO:0000256|RuleBase:RU366052}; Peripheral membrane protein {ECO:0000256|RuleBase:RU366052}; Cytoplasmic side {ECO:0000256|RuleBase:RU366052}. Cytoplasmic vesicle, COPI-coated vesicle membrane {ECO:0000256|RuleBase:RU366052}; Peripheral membrane protein {ECO:0000256|RuleBase:RU366052}; Cytoplasmic side {ECO…		PF00928;PF14372;
5351	LOC_Os06g41930	228.773	2.18117	0.245533	8.24e-20	4.5e-18	zinc-binding protein, putative, expressed	Os06g0624900				B9FQ01	B9FQ01_ORYSJ	unreviewed	Uncharacterized protein	OsJ_22026			osa:9268257;	PF04640;
5352	LOC_Os06g41930	228.773	2.18117	0.245533	8.24e-20	4.5e-18	zinc-binding protein, putative, expressed	Os06g0624900				A0A0N7KMF7	A0A0N7KMF7_ORYSJ	unreviewed	Putative zinc-binding protein	OSJNBa0029G06.28-2				PF04640;
2874	LOC_Os03g37830	6.14305	2.17869	1.36081	0.00745933	0.0268001	potassium transporter, putative, expressed	Os03g0574900	OsHAK27			Q84MS4	HAK27_ORYSJ	reviewed	Potassium transporter 27 (OsHAK27)	HAK27 Os03g0574900 LOC_Os03g37830 OSJNBa0029P07.16	integral component of membrane [GO:0016021]; membrane [GO:0016020]; potassium ion transmembrane transporter activity [GO:0015079]; potassium ion transport [GO:0006813]	SUBCELLULAR LOCATION: Membrane {ECO:0000305}; Multi-pass membrane protein {ECO:0000305}.	osa:4333296;	PF02705;
6050	LOC_Os07g43604	1.8989	2.17729	4.63767	0.0110514	0.0370976	expressed protein	Os07g0629500				A0A0N7KEE3	A0A0N7KEE3_ORYSJ	unreviewed	Os01g0944100 protein (Fragment)	Os01g0944100 OSNPB_010944100
4092	LOC_Os04g56700	3.62411	2.17413	1.4869	0.0122074	0.040404	naringenin,2-oxoglutarate 3-dioxygenase, putative, expressed	Os04g0662600	OsF3H-1, F3H-1, OsF3H1, OsF3H, F3H			Q7XM21	FL3H1_ORYSJ	reviewed	Flavanone 3-dioxygenase 1 (EC 1.14.11.9) (Flavanone 3-beta-hydroxylase 1) (Flavanone 3-hydroxylase 1) (OsF3H-1)	F3H-1 Os04g0662600 LOC_Os04g56700 OSJNBa0084K01.10	dioxygenase activity [GO:0051213]; L-ascorbic acid binding [GO:0031418]; metal ion binding [GO:0046872]; naringenin 3-dioxygenase activity [GO:0045486]; flavonoid biosynthetic process [GO:0009813]		osa:9270463;	PF03171;PF14226;
186	LOC_Os01g09570	1769.13	2.17133	0.145383	2.4e-51	1.3e-48	6-phosphofructokinase, putative, expressed	Os01g0191700	OsPFK01, PFK01, PFK1, OsPFK1			Q5SNH5	Q5SNH5_ORYSJ	unreviewed	ATP-dependent 6-phosphofructokinase (ATP-PFK) (Phosphofructokinase) (EC 2.7.1.11) (Phosphohexokinase)	PFK Os01g0191700 OSNPB_010191700	cytoplasm [GO:0005737]; 6-phosphofructokinase activity [GO:0003872]; ATP binding [GO:0005524]; metal ion binding [GO:0046872]; fructose 6-phosphate metabolic process [GO:0006002]	SUBCELLULAR LOCATION: Cytoplasm {ECO:0000256|HAMAP-Rule:MF_03186}.	osa:4327301;	PF00365;
692	LOC_Os01g49720	17.9107	2.17077	0.586702	2.4e-05	0.00017688	glutathione S-transferase, putative, expressed	Os01g0692100	OsGSTU39			Q8RZY8	Q8RZY8_ORYSJ	unreviewed	Os01g0692100 protein (cDNA, clone: J100032K22, full insert sequence)	Os01g0692100 OSNPB_010692100	cytoplasm [GO:0005737]; glutathione transferase activity [GO:0004364]; glutathione metabolic process [GO:0006749]		osa:4325643;	PF02798;
733	LOC_Os01g51870	97.6928	2.16652	0.256023	3.27e-18	1.52e-16	methyltransferase, putative, expressed	Os01g0716500				B9EZ57	B9EZ57_ORYSJ	unreviewed	Embryonic abundant protein-like (Os01g0716500 protein)	Os01g0716500 OsJ_03255 P0683B11.14			osa:4325584;	PF13649;
6794	LOC_Os09g11480	73.6848	2.16158	0.383253	2.09e-09	3.11e-08	AP2 domain containing protein, expressed	Os09g0287000	Sub1B, OsERF#063, OsERF063, ERF063, OsERF63, ERF63, AP2/EREBP#166, AP2/EREBP166			Q6EN65	Q6EN65_ORYSJ	unreviewed	AP2/ERF domain protein (Os09g0287000 protein) (cDNA clone:001-206-F09, full insert sequence) (cDNA clone:J013163J01, full insert sequence)	Os09g0287000 OSNPB_090287000	nucleus [GO:0005634]; DNA binding [GO:0003677]; DNA-binding transcription factor activity [GO:0003700]	SUBCELLULAR LOCATION: Nucleus {ECO:0000256|SAAS:SAAS00550310}.	osa:4346629;	PF00847;
5360	LOC_Os06g42660	41.3275	2.15899	0.517438	3.27e-06	2.9e-05	expressed protein	Os06g0633100				A0A0P0WZ58	A0A0P0WZ58_ORYSJ	unreviewed	Os06g0633100 protein	Os06g0633100 P0505A04.26	integral component of membrane [GO:0016021]; regulation of amino acid export [GO:0080143]		osa:4341587;
6381	LOC_Os08g19530	4.55497	2.1586	1.26077	0.007596	0.0272147	retrotransposon protein, putative, unclassified, expressed	NA	NA			C7J3Y7	C7J3Y7_ORYSJ	unreviewed	Os06g0363701 protein	Os06g0363701
893	LOC_Os01g58960	14.667	2.15851	0.605243	4.43e-05	0.000307846	cytochrome P450, putative, expressed	Os01g0803800	OsCYP94D12			A2ZYR7	A2ZYR7_ORYSJ	unreviewed	Uncharacterized protein	OsJ_03787	heme binding [GO:0020037]; iron ion binding [GO:0005506]; monooxygenase activity [GO:0004497]; oxidoreductase activity, acting on paired donors, with incorporation or reduction of molecular oxygen [GO:0016705]		osa:4327537;	PF00067;
8373	LOC_Os12g12000	10.0889	2.15774	0.887088	0.00142636	0.00657553	RALFL46 - Rapid ALkalinization Factor RALF family protein precursor, expressed	Os12g0221600	OsRALF-35, OsRALF35, RALF-35			B9GCE7	B9GCE7_ORYSJ	unreviewed	Os12g0221600 protein	Os12g0221600 OsJ_35591
6264	LOC_Os08g06170	31.78	2.15574	0.460337	3.26e-07	3.46e-06	berberine and berberine like domain containing protein, expressed	Os08g0158200				A0A0P0XC07	A0A0P0XC07_ORYSJ	unreviewed	Os08g0158200 protein (Putative Reticuline oxidase)	P0498E12.107 Os08g0158200 OsJ_26110	FAD binding [GO:0071949]; oxidoreductase activity [GO:0016491]		osa:4344706;	PF08031;PF01565;
4076	LOC_Os04g55980	7.21029	2.1556	1.00628	0.00303318	0.0125632	glycine-rich RNA-binding, abscisic acid-inducible protein, putative, expressed	Os04g0653700				A3AY53	A3AY53_ORYSJ	unreviewed	cDNA clone:001-107-A03, full insert sequence		integral component of membrane [GO:0016021]
1725	LOC_Os02g36590	89.0694	2.15484	0.268785	1.4e-16	5.45e-15	CPuORF19 - conserved peptide uORF-containing transcript, expressed	Os02g0575700	IIP3			Q69JW8	Q69JW8_ORYSJ	unreviewed	Os02g0575700 protein (cDNA clone:001-202-D10, full insert sequence)	Os02g0575700 OSNPB_020575700			osa:4329752;
7600	LOC_Os10g40570	146.99	2.15381	0.217403	5.01e-24	4.21e-22	flavin-containing monooxygenase family protein, putative, expressed	Os10g0553800				Q0IVU0	Q0IVU0_ORYSJ	unreviewed	Os10g0553800 protein	Os10g0553800	flavin adenine dinucleotide binding [GO:0050660]; N,N-dimethylaniline monooxygenase activity [GO:0004499]; NADP binding [GO:0050661]		osa:4349336;	PF00743;
155	LOC_Os01g08100	12.982	2.15207	0.638142	8.89e-05	0.000567175	flavonol-3-O-glycoside-7-O-glucosyltransferase 1, putative, expressed	Os01g0176100				Q9FU68	Q9FU68_ORYSJ	unreviewed	Glycosyltransferase (EC 2.4.1.-)	Os01g0176100 OSNPB_010176100	intracellular membrane-bounded organelle [GO:0043231]; transferase activity, transferring hexosyl groups [GO:0016758]; UDP-glycosyltransferase activity [GO:0008194]		osa:4326219;	PF00201;
4	ChrUn.fgenesh.gene.18	73.8291	2.14863	0.337434	2.31e-11	4.6e-10	expressed protein	NA	NA			B9EXK9	B9EXK9_ORYSJ	unreviewed	Peptidylprolyl isomerase (EC 5.2.1.8)	OsJ_02251	peptidyl-prolyl cis-trans isomerase activity [GO:0003755]			PF00254;
4764	LOC_Os05g45690	21.4955	2.14271	0.519665	4.6e-06	3.95e-05	expressed protein	Os05g0533400				Q6I5H2	Q6I5H2_ORYSJ	unreviewed	Os05g0533400 protein	Os05g0533400 OSNPB_050533400	ADP binding [GO:0043531]			PF00931;PF18052;
6153	LOC_Os07g48460	313.202	2.13833	0.220096	3.09e-23	2.4e-21	stress responsive protein, putative, expressed	Os07g0683600				B9FUX8	B9FUX8_ORYSJ	unreviewed	Uncharacterized protein	OsJ_25614
5229	LOC_Os06g30400	14.351	2.13553	0.695899	0.000224393	0.00129632	expressed protein	Os06g0499100				Q656A2	Q656A2_ORYSJ	unreviewed	Uncharacterized protein P0596H06.16	P0596H06.16
2479	LOC_Os03g12290	12549.2	2.13459	0.223467	1.84e-22	1.33e-20	glutamine synthetase, catalytic domain containing protein, expressed	Os03g0223400	OsGLN1;2, GSr, RGS8, OsGS1;2, GS1;2, GS1, OsGS1-2, GS1-2, OsGS1.2, GS1.2			P14654	GLN12_ORYSJ	reviewed	Glutamine synthetase cytosolic isozyme 1-2 (EC 6.3.1.2) (Glutamate--ammonia ligase GLN1;2) (OsGLN1;2) (Glutamine synthetase root isozyme) (OsGS1;2)	GLN1-2 GSR RGS8 Os03g0223400 LOC_Os03g12290 OJ1743A09.19 OsJ_09974	cytoplasm [GO:0005737]; ATP binding [GO:0005524]; glutamate-ammonia ligase activity [GO:0004356]; glutamine biosynthetic process [GO:0006542]	SUBCELLULAR LOCATION: Cytoplasm.	osa:4332108;	PF00120;PF03951;
6488	LOC_Os08g33140	45.666	2.12033	0.394848	9.29e-09	1.24e-07	F-box domain containing protein, expressed	Os08g0428100	OsFbox445, Os_F0550			Q7EY67	Q7EY67_ORYSJ	unreviewed	F-box protein family-like protein	OJ1663_D06.16 OSJNBb0032E15.123				PF12937;
5065	LOC_Os06g10650	81.7065	2.11833	0.293019	6.23e-14	1.73e-12	tyrosine phosphatase family protein, putative, expressed	Os06g0208700	OsPFA-DSP3			Q0DDQ5	Q0DDQ5_ORYSJ	unreviewed	Os06g0208700 protein	Os06g0208700	protein tyrosine phosphatase activity [GO:0004725]		osa:4340447;	PF03162;
4555	LOC_Os05g34830	40.5346	2.11804	0.404037	1.87e-08	2.39e-07	No apical meristem protein, putative, expressed	Os05g0421600	ONAC088, ONAC88			Q6L4Y5	Q6L4Y5_ORYSJ	unreviewed	Putative no apical meristem (NAM) protein	OSJNBb0092E21.9	nucleus [GO:0005634]; DNA binding [GO:0003677]; regulation of transcription, DNA-templated [GO:0006355]	SUBCELLULAR LOCATION: Nucleus {ECO:0000256|SAAS:SAAS01215438}.	osa:4338832;	PF02365;
762	LOC_Os01g52790	119.578	2.11773	0.301794	2.94e-13	7.42e-12	cytochrome P450 72A1, putative, expressed	Os01g0728300				Q9AX23	Q9AX23_ORYSJ	unreviewed	Os01g0728300 protein	Os01g0728300 OSNPB_010728300	integral component of membrane [GO:0016021]; heme binding [GO:0020037]; iron ion binding [GO:0005506]; monooxygenase activity [GO:0004497]; oxidoreductase activity, acting on paired donors, with incorporation or reduction of molecular oxygen [GO:0016705]		osa:4323921;	PF00067;
3523	LOC_Os04g28210	48.0701	2.11599	0.365396	9.1e-10	1.43e-08	verticillium wilt disease resistance protein, putative, expressed	Os04g0349700	OsVWR			Q7XKS4	Q7XKS4_ORYSJ	unreviewed	OSJNBa0038P21.7 protein	OSJNBa0038P21.7	integral component of membrane [GO:0016021]		osa:4335549;	PF13516;PF13855;PF08263;
488	LOC_Os01g36790	26.4048	2.11354	0.465881	7.03e-07	7.04e-06	TKL_IRAK_DUF26-lf.2 - DUF26 kinases have homology to DUF26 containing loci, expressed	Os01g0548750				B9EXG1	B9EXG1_ORYSJ	unreviewed	Uncharacterized protein	OsJ_02169	integral component of membrane [GO:0016021]; ATP binding [GO:0005524]; protein serine/threonine kinase activity [GO:0004674]			PF00069;PF01657;
489	LOC_Os01g36790	26.4048	2.11354	0.465881	7.03e-07	7.04e-06	TKL_IRAK_DUF26-lf.2 - DUF26 kinases have homology to DUF26 containing loci, expressed	Os01g0548600				B9EXG1	B9EXG1_ORYSJ	unreviewed	Uncharacterized protein	OsJ_02169	integral component of membrane [GO:0016021]; ATP binding [GO:0005524]; protein serine/threonine kinase activity [GO:0004674]			PF00069;PF01657;
6738	LOC_Os09g02180	4.61472	2.1134	1.30529	0.00861651	0.0301559	expressed protein	Os09g0109600	OsDSSR1			Q6YWA6	Q6YWA6_ORYSJ	unreviewed	Os09g0109600 protein (cDNA clone:001-117-H11, full insert sequence)	Os09g0109600 OSNPB_090109600			osa:4346387;
204	LOC_Os01g09990	78.1491	2.11121	0.350615	1.96e-10	3.4e-09	helix-loop-helix DNA-binding domain containing protein, expressed	Os01g0196300	OsbHLH025, bHLH025, bHLH25			A0A0P0V027	A0A0P0V027_ORYSJ	unreviewed	Basic helix-loop-helix protein-like (Os01g0196300 protein)	Os01g0196300 P0498B01.36	nucleus [GO:0005634]; protein dimerization activity [GO:0046983]; regulation of transcription, DNA-templated [GO:0006355]		osa:4327325;	PF00010;
6961	LOC_Os09g27990	66.6205	2.10838	0.34745	1.62e-10	2.86e-09	annexin, putative, expressed	Os09g0453300	OsANN10			B9G3Y7	B9G3Y7_ORYSJ	unreviewed	Os09g0453300 protein (Putative fiber annexin)	P0488D02.22-1 Os09g0453300 OsJ_29601	calcium ion binding [GO:0005509]; calcium-dependent phospholipid binding [GO:0005544]		osa:4347238;	PF00191;
6262	LOC_Os08g06010	202.366	2.10364	0.191091	4.89e-29	6.3e-27	transporter, major facilitator family, putative, expressed	Os08g0156600	OsVPE2			A0A0P0XCF9	A0A0P0XCF9_ORYSJ	unreviewed	Os08g0156600 protein	Os08g0156600	integral component of membrane [GO:0016021]; transmembrane transporter activity [GO:0022857]		osa:4344694;	PF07690;
3299	LOC_Os03g61160	8.52675	2.09749	0.812748	0.00108532	0.00516671	expressed protein	Os03g0826900	OsEnS-58			Q10B84	Q10B84_ORYSJ	unreviewed	Expressed protein	LOC_Os03g61160
3300	LOC_Os03g61160	8.52675	2.09749	0.812748	0.00108532	0.00516671	expressed protein	Os03g0826900	OsEnS-58			Q10B86	Q10B86_ORYSJ	unreviewed	Expressed protein	LOC_Os03g61160
3301	LOC_Os03g61160	8.52675	2.09749	0.812748	0.00108532	0.00516671	expressed protein	Os03g0826900	OsEnS-58			Q94GF5	Q94GF5_ORYSJ	unreviewed	Expressed protein	LOC_Os03g61160			osa:4334644;
3302	LOC_Os03g61160	8.52675	2.09749	0.812748	0.00108532	0.00516671	expressed protein	Os03g0826900	OsEnS-58			Q10B88	Q10B88_ORYSJ	unreviewed	Expressed protein	LOC_Os03g61160
5842	LOC_Os07g31830	2.70175	2.09678	2.053	0.0133827	0.0435592	GTPase activating protein, putative, expressed	Os07g0501700	OsSTA196			Q6ZII7	Q6ZII7_ORYSJ	unreviewed	Os07g0501700 protein (cDNA clone:J023068D10, full insert sequence)	Os07g0501700 OSNPB_070501700			osa:4343314;	PF00168;
5564	LOC_Os07g01130	677.768	2.0925	0.270711	1.36e-15	4.78e-14	pentatricopeptide containing protein, putative, expressed	Os07g0101300	OsbHLH188, bHLH188			B9FV32	B9FV32_ORYSJ	unreviewed	BHLH domain-containing protein	OsJ_22769	protein dimerization activity [GO:0046983]			PF14215;PF01535;PF12854;PF13041;
5565	LOC_Os07g01130	677.768	2.0925	0.270711	1.36e-15	4.78e-14	pentatricopeptide containing protein, putative, expressed	Os07g0101200	OsbHLH188, bHLH188			B9FV32	B9FV32_ORYSJ	unreviewed	BHLH domain-containing protein	OsJ_22769	protein dimerization activity [GO:0046983]			PF14215;PF01535;PF12854;PF13041;
1888	LOC_Os02g45040	12.0848	2.09153	0.729742	0.00045271	0.00241515	retrotransposon protein, putative, unclassified, expressed	Os02g0671800				B7F0F4	B7F0F4_ORYSJ	unreviewed	Os02g0671800 protein (cDNA clone:002-130-E02, full insert sequence)	Os02g0671800 OSNPB_020671800	nucleic acid binding [GO:0003676]			PF13976;
1454	LOC_Os02g11990	71.278	2.09021	0.311209	2.47e-12	5.56e-11	expressed protein	NA	NA			Q6H841	Q6H841_ORYSJ	unreviewed	Uncharacterized protein OJ1267_F10.4	OJ1267_F10.4
3580	LOC_Os04g33110	325.857	2.08917	0.222624	7.65e-22	5.11e-20	expressed protein	Os04g0403900				Q7F8W7	Q7F8W7_ORYSJ	unreviewed	OJ000315_02.4 protein	OJ000315_02.4
8386	LOC_Os12g13380	1380.81	2.08862	0.191535	1.4e-28	1.72e-26	adenylate kinase, putative, expressed	Os12g0236400	Adk-a			Q08479	KAD3_ORYSJ	reviewed	Adenylate kinase 3 (EC 2.7.4.3) (ATP-AMP transphosphorylase 3) (ATP:AMP phosphotransferase) (Adenylate kinase A) (AK A) (Adenylate monophosphate kinase 3)	ADK-A Os12g0236400 LOC_Os12g13380	cytoplasm [GO:0005737]; adenylate kinase activity [GO:0004017]; ATP binding [GO:0005524]; purine nucleotide metabolic process [GO:0006163]	SUBCELLULAR LOCATION: Cytoplasm {ECO:0000250|UniProtKB:P69441}.	osa:4351850;	PF05191;
7893	LOC_Os11g13570	10.0674	2.08809	0.730546	0.000497691	0.00261994	gibberellin receptor GID1L2, putative, expressed	Os11g0239500				A3CA26	A3CA26_ORYSJ	unreviewed	Os11g0239600 protein	LOC_Os11g13570 Os11g0239600 OsJ_33483	hydrolase activity [GO:0016787]; catabolic process [GO:0009056]		osa:9267725;	PF07859;
8177	LOC_Os11g47550	10.8795	2.0853	0.825904	0.00110668	0.0052531	glycosyl hydrolase, putative, expressed	Os11g0701400	C10150			Q53NL3	Q53NL3_ORYSJ	unreviewed	Chitinase III C10150-rice (EC 3.2.1.14) (Os11g0701400 protein)	Os11g0701400	extracellular region [GO:0005576]; chitinase activity [GO:0004568]; xylan catabolic process [GO:0045493]		osa:4351190;	PF00704;
5888	LOC_Os07g35380	56.2473	2.08515	0.343641	1.73e-10	3.03e-09	TKL_IRAK_DUF26-lc.16 - DUF26 kinases have homology to DUF26 containing loci, expressed	Os07g0538300				Q6YVV7	Q6YVV7_ORYSJ	unreviewed	Putative serine/threonine-specific protein kinase	OsJ_24585 P0696F12.8	integral component of membrane [GO:0016021]; ATP binding [GO:0005524]; protein kinase activity [GO:0004672]		osa:4343484;	PF00069;PF01657;
193	LOC_Os01g09700	56.1839	2.08365	0.492392	2.59e-06	2.34e-05	aminotransferase, classes I and II, domain containing protein, expressed	Os01g0192900	OsACS5, OS-ACS5, OsBphi008a			A0A0P0UZP7	A0A0P0UZP7_ORYSJ	unreviewed	Os01g0192900 protein	Os01g0192900 OSNPB_010192900	catalytic activity [GO:0003824]; pyridoxal phosphate binding [GO:0030170]; biosynthetic process [GO:0009058]			PF00155;
6002	LOC_Os07g41410	193.083	2.07456	0.262265	3.26e-16	1.22e-14	EGG APPARATUS-1, putative, expressed	Os07g0605400				Q0D4T3	Q0D4T3_ORYSJ	unreviewed	Os07g0605400 protein	Os07g0605400 OSJNBb0040H10.32			osa:4343852;
443	LOC_Os01g31940	14.1201	2.07412	0.655987	0.000187876	0.00110585	purine permease, putative, expressed	Os01g0504100	OsPUP8			Q5QNA0	Q5QNA0_ORYSJ	unreviewed	Os01g0504100 protein (cDNA clone:001-206-B08, full insert sequence)	Os01g0504100 OSNPB_010504100	integral component of membrane [GO:0016021]; purine nucleoside transmembrane transporter activity [GO:0015211]		osa:4324489;
3499	LOC_Os04g21730	5.96763	2.06703	1.03469	0.00450748	0.017615	XH domain containing protein	NA	NA			Q7XW71	Q7XW71_ORYSJ	unreviewed	OSJNBa0019J05.23 protein (OSJNBb0032D24.3 protein)	OSJNBa0019J05.23 OSJNBb0032D24.3				PF03469;
7480	LOC_Os10g36200	271.398	2.06428	0.255137	7.95e-17	3.17e-15	heavy metal-associated domain containing protein, expressed	Os10g0506100				Q109F9	Q109F9_ORYSJ	unreviewed	Heavy-metal-associated domain-containing protein, putative, expressed	LOC_Os10g36200	metal ion binding [GO:0046872]; metal ion transport [GO:0030001]			PF00403;
7481	LOC_Os10g36200	271.398	2.06428	0.255137	7.95e-17	3.17e-15	heavy metal-associated domain containing protein, expressed	Os10g0506100				A3C6A8	A3C6A8_ORYSJ	unreviewed	Os10g0506100 protein	Os10g0506100 OsJ_32093	metal ion binding [GO:0046872]; metal ion transport [GO:0030001]		osa:4349064;	PF00403;
4268	LOC_Os05g05070	7.63001	2.06312	0.889222	0.00213618	0.00933982	expressed protein	Os05g0142500				A0A0P0WHW5	A0A0P0WHW5_ORYSJ	unreviewed	Os05g0142500 protein	Os05g0142500 OSNPB_050142500
8399	LOC_Os12g15680	106.424	2.06113	0.355697	8.17e-10	1.29e-08	laccase precursor protein, putative, expressed	Os12g0258700	OsLAC29			A0A0P0Y8S2	A0A0P0Y8S2_ORYSJ	unreviewed	Laccase (EC 1.10.3.2) (Benzenediol:oxygen oxidoreductase) (Diphenol oxidase) (Urishiol oxidase)	Os12g0258700 OSNPB_120258700	apoplast [GO:0048046]; copper ion binding [GO:0005507]; hydroquinone:oxygen oxidoreductase activity [GO:0052716]; lignin catabolic process [GO:0046274]	SUBCELLULAR LOCATION: Secreted, extracellular space, apoplast {ECO:0000256|RuleBase:RU361119}.	osa:4351915;	PF00394;PF07731;PF07732;
3649	LOC_Os04g37490	232.827	2.06112	0.273379	5.63e-15	1.8e-13	oxidoreductase, aldo/keto reductase family protein, putative, expressed	Os04g0447700				A0A0P0WB95	A0A0P0WB95_ORYSJ	unreviewed	Os04g0447700 protein	Os04g0447700	cytosol [GO:0005829]; alcohol dehydrogenase (NADP+) activity [GO:0008106]; alditol:NADP+ 1-oxidoreductase activity [GO:0004032]; oxidoreductase activity [GO:0016491]			PF00248;
8123	LOC_Os11g42200	234.729	2.06067	0.325772	3.04e-11	5.92e-10	laccase precursor protein, putative, expressed	Os11g0641500	OsLAC23, OsLAC19, LAC19			Q2R0L2	LAC19_ORYSJ	reviewed	Laccase-19 (EC 1.10.3.2) (Benzenediol:oxygen oxidoreductase 19) (Diphenol oxidase 19) (Urishiol oxidase 19)	LAC19 Os11g0641500 LOC_Os11g42200 OsJ_033252	apoplast [GO:0048046]; plasma membrane [GO:0005886]; copper ion binding [GO:0005507]; ferroxidase activity [GO:0004322]; hydroquinone:oxygen oxidoreductase activity [GO:0052716]; iron ion homeostasis [GO:0055072]; iron ion transport [GO:0006826]; lignin catabolic process [GO:0046274]	SUBCELLULAR LOCATION: Secreted, extracellular space, apoplast {ECO:0000305}.	osa:4351005;	PF00394;PF07731;PF07732;
1451	LOC_Os02g11970	7.02292	2.05895	1.03762	0.00434102	0.0170659	expressed protein	Os02g0211100				Q6H843	Q6H843_ORYSJ	unreviewed	Uncharacterized protein	OJ1006_A02.46-1 OJ1267_F10.1-1
1452	LOC_Os02g11970	7.02292	2.05895	1.03762	0.00434102	0.0170659	expressed protein	Os02g0211100				B9F489	B9F489_ORYSJ	unreviewed	Uncharacterized protein	OsJ_05861
8518	LOC_Os12g33610	10.0819	2.05866	0.950874	0.00268424	0.0113367	phenylalanine ammonia-lyase, putative, expressed	Os12g0520200	OsPAL03, OsPAL9, TAM1, OsTAM1, TAM, OsTAM			A0A0P0YAL3	A0A0P0YAL3_ORYSJ	unreviewed	Phenylalanine ammonia-lyase (EC 4.3.1.24)	Os12g0520200 OSNPB_120520200	cytoplasm [GO:0005737]; ammonia-lyase activity [GO:0016841]; phenylalanine ammonia-lyase activity [GO:0045548]; cinnamic acid biosynthetic process [GO:0009800]; L-phenylalanine catabolic process [GO:0006559]	SUBCELLULAR LOCATION: Cytoplasm {ECO:0000256|RuleBase:RU003955}.		PF00221;
167	LOC_Os01g08810	38.9119	2.05771	0.373062	4.8e-09	6.72e-08	cytochrome P450, putative, expressed	Os01g0183600	OsCYP96E1			A0A0N7KCG5	A0A0N7KCG5_ORYSJ	unreviewed	Os01g0183600 protein (Putative cytochrome P450)	Os01g0183600 P0489A01.14	heme binding [GO:0020037]; iron ion binding [GO:0005506]; monooxygenase activity [GO:0004497]; oxidoreductase activity, acting on paired donors, with incorporation or reduction of molecular oxygen [GO:0016705]		osa:4325338;	PF00067;
7825	LOC_Os11g07124	40.6648	2.0562	0.443471	4.4e-07	4.57e-06	EFR, putative, expressed	Os11g0172300				A0A0P0XZP1	A0A0P0XZP1_ORYSJ	unreviewed	Os11g0172300 protein (Fragment)	Os11g0172300 OSNPB_110172300				PF00560;PF08263;
3940	LOC_Os04g50760	23.6129	2.0561	0.461725	1.13e-06	1.1e-05	ara54-like RING finger protein, putative, expressed	Os04g0594000				A3AWZ6	A3AWZ6_ORYSJ	unreviewed	RBR-type E3 ubiquitin transferase (EC 2.3.2.31)	OsJ_15995	metal ion binding [GO:0046872]; ubiquitin-protein transferase activity [GO:0004842]			PF01485;PF05773;
1726	LOC_Os02g36619	92.3209	2.05314	0.311223	5.3e-12	1.15e-10	exo70 exocyst complex subunit, putative, expressed	Os02g0575900	OsEXO70FX6, OsExo70FX6, OrysaFX6_Exo70			Q69S75	Q69S75_ORYSJ	unreviewed	Leucine zipper protein-like (Os02g0575900 protein)	Os02g0575900 B1342F01.4 OsJ_07242 P0703B01.25	exocyst [GO:0000145]; exocytosis [GO:0006887]; protein transport [GO:0015031]		osa:4329754;	PF03081;
1092	LOC_Os01g67360	47.8869	2.05307	0.372128	4.64e-09	6.52e-08	methyltransferase, putative, expressed	Os01g0899200				A3A0K3	A3A0K3_ORYSJ	unreviewed	Methyltransferase (EC 2.1.1.-)	OsJ_04423	integral component of membrane [GO:0016021]; methyltransferase activity [GO:0008168]; methylation [GO:0032259]	SUBCELLULAR LOCATION: Membrane {ECO:0000256|RuleBase:RU366043}; Single-pass type II membrane protein {ECO:0000256|RuleBase:RU366043}.		PF03141;
630	LOC_Os01g47290	2.7077	2.04988	2.10922	0.0141036	0.0455149	expressed protein	Os01g0661750				C7IY05	C7IY05_ORYSJ	unreviewed	Os01g0661750 protein	Os01g0661750
2630	LOC_Os03g18470	9.85037	2.04913	0.744316	0.000695017	0.00350491	expressed protein	Os03g0295866				A3AGZ6	A3AGZ6_ORYSJ	unreviewed	Uncharacterized protein	OsJ_10482	nucleus [GO:0005634]		osa:107277100;	PF08711;
7649	LOC_Os10g41980	211.781	2.04877	0.256995	2.02e-16	7.76e-15	RALFL26 - Rapid ALkalinization Factor RALF family protein precursor, expressed	Os10g0569400	Rir1b, Rir1a, OsRALF-28, OsRALF28, RALF-28, RALF28			Q0IVI0	Q0IVI0_ORYSJ	unreviewed	Os10g0569400 protein	Os10g0569400
144	LOC_Os01g07730	114.228	2.04862	0.257572	2.29e-16	8.71e-15	phosphate/phosphoenolpyruvate translocator-related protein, putative, expressed	Os01g0172100	OsPPT3			Q5VQL3	PPT3_ORYSJ	reviewed	Phosphoenolpyruvate/phosphate translocator 3, chloroplastic (OsPPT3)	PPT3 Os01g0172100 LOC_Os01g07730 P0583G08.29	chloroplast membrane [GO:0031969]; Golgi apparatus [GO:0005794]; integral component of membrane [GO:0016021]; antiporter activity [GO:0015297]; phosphoenolpyruvate:phosphate antiporter activity [GO:0015121]; phosphoglycerate transmembrane transporter activity [GO:0015120]; transmembrane transporter activity [GO:0022857]; triose-phosphate transmembrane transporter activity [GO:0071917]; phosphoeno…	SUBCELLULAR LOCATION: Plastid, chloroplast membrane {ECO:0000305}; Multi-pass membrane protein {ECO:0000305}.	osa:4327644;	PF03151;
7963	LOC_Os11g25454	62.6308	2.04745	0.295983	6.6e-13	1.58e-11	cytokinin-N-glucosyltransferase 1, putative, expressed	Os11g0441500				Q0ISY7	Q0ISY7_ORYSJ	unreviewed	Glycosyltransferase (EC 2.4.1.-)	LOC_Os11g25454 Os11g0441500 OSNPB_110441500	intracellular membrane-bounded organelle [GO:0043231]; quercetin 3-O-glucosyltransferase activity [GO:0080043]; quercetin 7-O-glucosyltransferase activity [GO:0080044]; UDP-glycosyltransferase activity [GO:0008194]			PF00201;
8275	LOC_Os12g05080	96.0515	2.04591	0.247674	2.12e-17	9.07e-16	PMR5, putative, expressed	Os12g0145400	OsTBL23, TBL23			Q0IQ51	Q0IQ51_ORYSJ	unreviewed	Os12g0145400 protein	Os12g0145400	Golgi apparatus [GO:0005794]; O-acetyltransferase activity [GO:0016413]			PF13839;PF14416;
4022	LOC_Os04g53860	73.1911	2.0424	0.310412	6.09e-12	1.3e-10	reductase, putative, expressed	Os04g0630900				A0A0N7KJR7	A0A0N7KJR7_ORYSJ	unreviewed	Os04g0630900 protein (Fragment)	Os04g0630900 OSNPB_040630900	integral component of membrane [GO:0016021]; 3-beta-hydroxy-delta5-steroid dehydrogenase activity [GO:0003854]; oxidoreductase activity [GO:0016491]; oxidoreductase activity, acting on the CH-OH group of donors, NAD or NADP as acceptor [GO:0016616]; steroid biosynthetic process [GO:0006694]			PF01073;
7522	LOC_Os10g38150	40.1108	2.04019	0.384772	1.45e-08	1.89e-07	glutathione S-transferase, N-terminal domain containing protein, expressed	Os10g0525500	OsGSTU21			Q7G228	Q7G228_ORYSJ	unreviewed	Glutathione S-transferase parC, putative, expressed (Os10g0525500 protein) (cDNA clone:001-111-C12, full insert sequence)	LOC_Os10g38150 Os10g0525500 OSNPB_100525500	cytoplasm [GO:0005737]; glutathione transferase activity [GO:0004364]; glutathione metabolic process [GO:0006749]			PF02798;
3609	LOC_Os04g34190	10.0811	2.03954	0.745177	0.000692205	0.00349435	retrotransposon protein, putative, unclassified, expressed	NA	NA			Q7XQY0	Q7XQY0_ORYSJ	unreviewed	OSJNBb0108J11.11 protein	OSJNBb0108J11.11				PF17921;PF17919;PF00078;
6651	LOC_Os08g42080	75.2899	2.03546	0.394437	3.06e-08	3.79e-07	ACR5, putative, expressed	Os08g0533300				A0A0N7KQ73	A0A0N7KQ73_ORYSJ	unreviewed	Os08g0533300 protein	Os08g0533300 OSNPB_080533300			osa:4346144;	PF01842;
7136	LOC_Os09g38670	14.0682	2.03388	0.646025	0.000193857	0.00113802	thioredoxin, putative, expressed	Os09g0559600				A3C1G5	A3C1G5_ORYSJ	unreviewed	Thioredoxin domain-containing protein	OsJ_30323	cell [GO:0005623]; cell redox homeostasis [GO:0045454]			PF00085;
7137	LOC_Os09g38670	14.0682	2.03388	0.646025	0.000193857	0.00113802	thioredoxin, putative, expressed	Os09g0559600				Q0IZN2	Q0IZN2_ORYSJ	unreviewed	Os09g0559600 protein	Os09g0559600 OJ1065_E04.18	cell [GO:0005623]; cell redox homeostasis [GO:0045454]			PF00085;
8461	LOC_Os12g25170	40.3323	2.0329	0.397197	4.15e-08	5.04e-07	NB-ARC domain containing disease resistance protein, putative, expressed	Os12g0438300				Q0INK6	Q0INK6_ORYSJ	unreviewed	Os12g0438300 protein	Os12g0438300 OsJ_35961	ADP binding [GO:0043531]		osa:4352130;	PF00931;PF18052;
94	LOC_Os01g05640	34.1612	2.02951	0.572112	4.5e-05	0.000311991	receptor-like protein kinase 5 precursor, putative, expressed	Os01g0149700				Q5ZED4	Q5ZED4_ORYSJ	unreviewed	Os01g0149700 protein	Os01g0149700 OsJ_00382 P0434B04.32	integral component of membrane [GO:0016021]; ATP binding [GO:0005524]; protein serine/threonine kinase activity [GO:0004674]			PF13855;PF08263;PF00069;
5599	LOC_Os07g03000	2.60549	2.02659	2.03514	0.0144261	0.0463965	receptor-like protein kinase precursor, putative, expressed	Os07g0121200				A0A0P0X1Y5	A0A0P0X1Y5_ORYSJ	unreviewed	Uncharacterized protein	OsJ_22922	integral component of membrane [GO:0016021]; ATP binding [GO:0005524]; protein serine/threonine kinase activity [GO:0004674]		osa:4342285;	PF00560;PF13855;PF08263;PF00069;
8687	LOC_Os12g43790	7.49673	2.02622	0.868268	0.00211381	0.0092591	bZIP transcription factor domain containing protein, expressed	Os12g0634500	OsbZIP89			Q2QLP2	Q2QLP2_ORYSJ	unreviewed	BZIP transcription factor family protein, expressed (Os12g0634500 protein)	LOC_Os12g43790 Os12g0634500 OSNPB_120634500	nucleus [GO:0005634]; DNA-binding transcription factor activity [GO:0003700]; sequence-specific DNA binding [GO:0043565]; transcription regulatory region DNA binding [GO:0044212]; positive regulation of transcription, DNA-templated [GO:0045893]		osa:9272516;	PF00170;
678	LOC_Os01g48960	12407.3	2.02579	0.184523	6.54e-29	8.28e-27	glutamate synthase, chloroplast precursor, putative, expressed	Os01g0681900	OsGLT1, OsNADH-GOGAT1, NADH-GOGAT1, OsNADH-GOGAT, GOGAT, NADH-GOGAT, OsGOGAT1, GOGAT1			Q0JKD0	GLT1_ORYSJ	reviewed	Glutamate synthase 1 [NADH], chloroplastic (EC 1.4.1.14) (NADH-dependent glutamate synthase 1) (NADH-GOGAT 1)	Os01g0681900 LOC_Os01g48960	chloroplast [GO:0009507]; plastid [GO:0009536]; 3 iron, 4 sulfur cluster binding [GO:0051538]; flavin adenine dinucleotide binding [GO:0050660]; FMN binding [GO:0010181]; glutamate synthase (NADH) activity [GO:0016040]; glutamate synthase activity [GO:0015930]; iron ion binding [GO:0005506]; oxidoreductase activity [GO:0016491]; ammonia assimilation cycle [GO:0019676]; developmental growth [GO:00…	SUBCELLULAR LOCATION: Plastid, chloroplast {ECO:0000269|PubMed:9952435}.	osa:4324398;	PF14691;PF00310;PF04898;PF01645;PF01493;PF07992;
523	LOC_Os01g40290	30.9416	2.02548	0.446024	7.15e-07	7.13e-06	expressed protein	Os01g0585200				Q94D46	Q94D46_ORYSJ	unreviewed	Os01g0585200 protein (cDNA clone:002-132-G01, full insert sequence)	Os01g0585200 OSNPB_010585200	integral component of membrane [GO:0016021]		osa:4327653;
8369	LOC_Os12g10880	14.739	2.02512	0.602518	9.5e-05	0.000602715	expressed protein	Os12g0211900				A0A0P0Y8E8	A0A0P0Y8E8_ORYSJ	unreviewed	Uncharacterized protein	OsJ_35581
518	LOC_Os01g39890	114.073	2.02019	0.337853	2.8e-10	4.76e-09	transposon protein, putative, unclassified, expressed	Os01g0580800				A0A0P0V4H2	A0A0P0V4H2_ORYSJ	unreviewed	Os01g0580800 protein	Os01g0580800 OSNPB_010580800	chloroplast outer membrane [GO:0009707]; chloroplast organization [GO:0009658]
1536	LOC_Os02g16940	322.016	2.01771	0.781861	0.00087193	0.00426875	OsSub13 - Putative Subtilisin homologue, expressed	Os02g0269600	OsSub13, SUB13			Q6ERT3	Q6ERT3_ORYSJ	unreviewed	Os02g0269600 protein (Putative subtilisin-like serine proteinase)	Os02g0269600 OsJ_06196 P0693E08.30	serine-type endopeptidase activity [GO:0004252]			PF17766;PF05922;PF00082;
5321	LOC_Os06g39875	15.6355	2.01343	0.609062	0.00011261	0.000699555	ras-related protein, putative, expressed	Os06g0600301				Q69XM7	RAN3_ORYSJ	reviewed	GTP-binding nuclear protein Ran-3 (OsRan3) (Ras-related nuclear protein 3)	RAN3 Os06g0600301 LOC_Os06g39875 OsJ_021038 P0457B11.6	cytoplasm [GO:0005737]; nucleus [GO:0005634]; GTP binding [GO:0005525]; GTPase activity [GO:0003924]; protein import into nucleus [GO:0006606]; ribosomal subunit export from nucleus [GO:0000054]	SUBCELLULAR LOCATION: Nucleus {ECO:0000250}.		PF00071;
4029	LOC_Os04g54080	55.739	2.01174	0.376832	1.21e-08	1.59e-07	serine/threonine-protein kinase receptor precursor, putative, expressed	Os04g0633300				Q0J9S8	Q0J9S8_ORYSJ	unreviewed	Receptor-like serine/threonine-protein kinase (EC 2.7.11.1)	Os04g0633300	integral component of membrane [GO:0016021]; ATP binding [GO:0005524]; protein serine/threonine kinase activity [GO:0004674]; recognition of pollen [GO:0048544]			PF01453;PF08276;PF07714;PF00954;
241	LOC_Os01g12130	39.3318	2.01055	0.407813	1.09e-07	1.25e-06	nodulin MtN3 family protein, putative, expressed	Os01g0220700	OsSWEET3b, SWEET3b			Q5NAZ9	SWT3B_ORYSJ	reviewed	Bidirectional sugar transporter SWEET3b (OsSWEET3b)	SWEET3B Os01g0220700 LOC_Os01g12130 OsJ_00913 P0483F08.29	integral component of membrane [GO:0016021]; integral component of plasma membrane [GO:0005887]; sugar transmembrane transporter activity [GO:0051119]; carbohydrate transport [GO:0008643]	SUBCELLULAR LOCATION: Cell membrane {ECO:0000250|UniProtKB:Q8L9J7}; Multi-pass membrane protein {ECO:0000250|UniProtKB:Q8L9J7}.	osa:4324648;	PF03083;
5615	LOC_Os07g03840	28.9914	2.00792	0.477129	3.32e-06	2.94e-05	lectin-like receptor kinase, putative, expressed	Os07g0130400				Q84ZI0	Q84ZI0_ORYSJ	unreviewed	Putative receptor-like protein kinase	P0483E09.10	integral component of membrane [GO:0016021]; ATP binding [GO:0005524]; carbohydrate binding [GO:0030246]; protein kinase activity [GO:0004672]			PF00139;PF00069;
3711	LOC_Os04g39980	73.818	2.00502	0.319651	4.56e-11	8.71e-10	gibberellin 20 oxidase 2, putative, expressed	Os04g0475600				Q7XKU5	DAO_ORYSJ	reviewed	2-oxoglutarate-dependent dioxygenase DAO (EC 1.14.11.-) (Protein DIOXYGENASE FOR AUXIN OXIDATION)	DAO Os04g0475600 LOC_Os04g39980 OSJNBa0022H21.12	dioxygenase activity [GO:0051213]; indole-3-acetaldehyde oxidase activity [GO:0050302]; metal ion binding [GO:0046872]; auxin catabolic process [GO:0009852]; auxin homeostasis [GO:0010252]		osa:4336150;	PF03171;PF14226;
4503	LOC_Os05g32420	12.2731	2.00387	0.681602	0.000384709	0.00208809	expressed protein	Os05g0390300				Q6I5X4	Q6I5X4_ORYSJ	unreviewed	Os05g0390300 protein	Os05g0390300 OJ1562_H01.11				PF11250;
7054	LOC_Os09g33460	16.9713	2.00297	0.605291	0.000114649	0.00071095	double-stranded RNA binding motif containing protein, expressed	Os09g0508500	OsDRB3			B7E321	DRB5_ORYSJ	reviewed	Double-stranded RNA-binding protein 5 (dsRNA-binding protein 2) (OsDRB2) (dsRNA-binding protein 5)	DRB5 DRB2 Os09g0508500 LOC_Os09g33460	RNA binding [GO:0003723]		osa:4347527;	PF00035;
7055	LOC_Os09g33460	16.9713	2.00297	0.605291	0.000114649	0.00071095	double-stranded RNA binding motif containing protein, expressed	Os09g0508500	OsDRB3			B9G4H3	B9G4H3_ORYSJ	unreviewed	Uncharacterized protein	OsJ_29958	RNA binding [GO:0003723]			PF00035;
1706	LOC_Os02g35770	30.8625	2.00286	0.426571	3.64e-07	3.84e-06	homeobox associated leucine zipper, putative, expressed	Os02g0565600	Oshox7, OsHox7			Q0E0A6	HOX7_ORYSJ	reviewed	Homeobox-leucine zipper protein HOX7 (HD-ZIP protein HOX7) (Homeodomain transcription factor HOX7) (OsHox7)	HOX7 Os02g0565600 LOC_Os02g35770 P0020C11.33	nucleus [GO:0005634]; DNA-binding transcription factor activity [GO:0003700]; sequence-specific DNA binding [GO:0043565]	SUBCELLULAR LOCATION: Nucleus {ECO:0000305}.	osa:4329705;	PF02183;PF00046;
1707	LOC_Os02g35770	30.8625	2.00286	0.426571	3.64e-07	3.84e-06	homeobox associated leucine zipper, putative, expressed	Os02g0565600	Oshox7, OsHox7			B9F0M4	B9F0M4_ORYSJ	unreviewed	Homeobox domain-containing protein	OsJ_07182	nucleus [GO:0005634]; DNA-binding transcription factor activity [GO:0003700]; sequence-specific DNA binding [GO:0043565]	SUBCELLULAR LOCATION: Nucleus {ECO:0000256|PROSITE-ProRule:PRU00108, ECO:0000256|RuleBase:RU000682}.		PF02183;PF00046;
5189	LOC_Os06g21820	8.10111	2.00037	1.53008	0.00981802	0.0336504	jasmonate O-methyltransferase, putative, expressed	Os06g0323100				A0A0P0WW84	A0A0P0WW84_ORYSJ	unreviewed	Os06g0323100 protein (Fragment)	Os06g0323100 OSNPB_060323100	S-adenosylmethionine-dependent methyltransferase activity [GO:0008757]; methylation [GO:0032259]			PF03492;
5190	LOC_Os06g21820	8.10111	2.00037	1.53008	0.00981802	0.0336504	jasmonate O-methyltransferase, putative, expressed	Os06g0323100				A3BB83	A3BB83_ORYSJ	unreviewed	Uncharacterized protein	OsJ_21163	methyltransferase activity [GO:0008168]			PF03492;
461	LOC_Os01g33810	42.4377	1.99857	0.520099	1.45e-05	0.000112408	disease resistance protein RPM1, putative, expressed	Os01g0521600				Q0JMA1	Q0JMA1_ORYSJ	unreviewed	Os01g0521600 protein	Os01g0521600	ADP binding [GO:0043531]			PF00931;
834	LOC_Os01g56210	7.40233	1.99777	0.873971	0.00240631	0.0103188	expressed protein	NA	NA			Q8LIX1	Q8LIX1_ORYSJ	unreviewed	Exocyst subunit Exo70 family protein	B1143G03.11 OSJNBb0053G03.25	exocyst [GO:0000145]; exocytosis [GO:0006887]; protein transport [GO:0015031]			PF03081;
1667	LOC_Os02g32814	292.695	1.99179	0.229785	6.05e-19	3.07e-17	heavy metal-associated domain containing protein, expressed	Os02g0530100	OsATX1, CCH, ATX1, OsHMP14, HMP14			A0A0P0VJT1	A0A0P0VJT1_ORYSJ	unreviewed	Os02g0530100 protein (Fragment)	Os02g0530100 OSNPB_020530100	metal ion binding [GO:0046872]; metal ion transport [GO:0030001]			PF00403;
2324	LOC_Os03g05630	12.002	1.99036	0.692703	0.000490356	0.00258761	expressed protein	Os03g0150700				A0A0P0VT20	A0A0P0VT20_ORYSJ	unreviewed	Os03g0150700 protein	Os03g0150700 OSNPB_030150700
4084	LOC_Os04g56420	124.978	1.98807	0.271119	3.04e-14	8.74e-13	retrotransposon protein, putative, unclassified, expressed	Os04g0659200				Q7XR08	Q7XR08_ORYSJ	unreviewed	OSJNBa0011F23.17 protein (OSJNBa0015K02.4 protein)	OSJNBa0011F23.17 OSJNBa0015K02.4
2485	LOC_Os03g12520	9.37711	1.98805	0.870315	0.00223016	0.00966043	STRUBBELIG-RECEPTOR FAMILY 7 precursor, putative, expressed	Os03g0226300	OsRLCK104			Q0DTT6	Q0DTT6_ORYSJ	unreviewed	Os03g0226300 protein	OSJNBa0081P02.20 Os03g0226300 OsJ_09992	plasma membrane [GO:0005886]; ATP binding [GO:0005524]; protein tyrosine kinase activity [GO:0004713]; transmembrane receptor protein serine/threonine kinase activity [GO:0004675]; protein phosphorylation [GO:0006468]		osa:4332124;	PF07714;
3115	LOC_Os03g53750	499.359	1.98734	0.199942	3.72e-24	3.18e-22	nuclear prelamin A recognition factor, putative, expressed	Os03g0748700	OsISC38			A0A5S6R6W8	A0A5S6R6W8_ORYSJ	unreviewed	Os03g0748700 protein (Putative hydrogenase)	OSJNBa0069E14.4 Os03g0748700	cytosol [GO:0005829]; nucleus [GO:0005634]; response to oxygen levels [GO:0070482]		osa:4334110;	PF02906;PF02256;
2978	LOC_Os03g47034	153.486	1.98717	0.287409	5.96e-13	1.44e-11	expressed protein	Os03g0673400				C7J044	C7J044_ORYSJ	unreviewed	Os03g0673400 protein	Os03g0673400 OSNPB_030673400
8481	LOC_Os12g29680	66.2358	1.98357	0.304553	9.87e-12	2.05e-10	hypothetical protein	NA	NA			Q2QQW0	Q2QQW0_ORYSJ	unreviewed	Uncharacterized protein	LOC_Os12g29680
5423	LOC_Os06g45940	41.5545	1.97851	0.3608	5.76e-09	7.97e-08	potassium transporter, putative, expressed	Os06g0671000	OsHAK13			Q652J4	HAK13_ORYSJ	reviewed	Probable potassium transporter 13 (OsHAK13)	HAK13 Os06g0671000 LOC_Os06g45940 OSJNBa0032M14.1 P0485A07.11	integral component of membrane [GO:0016021]; membrane [GO:0016020]; potassium ion transmembrane transporter activity [GO:0015079]; potassium ion transport [GO:0006813]	SUBCELLULAR LOCATION: Membrane {ECO:0000305}; Multi-pass membrane protein {ECO:0000305}.		PF02705;
2155	LOC_Os02g56420	10.3332	1.97509	0.727708	0.000798318	0.00395051	OsWAK23 - OsWAK short gene, expressed	Os02g0808300	OsWAK23			Q6K9A8	Q6K9A8_ORYSJ	unreviewed	Os02g0808300 protein	Os02g0808300 OSNPB_020808300	plasma membrane [GO:0005886]; polysaccharide binding [GO:0030247]; protein serine/threonine kinase activity [GO:0004674]; cell surface receptor signaling pathway [GO:0007166]; protein phosphorylation [GO:0006468]			PF13947;
2191	LOC_Os02g57700	46.6718	1.97243	0.414295	2.4e-07	2.6e-06	protein kinase, putative, expressed	Os02g0822900	OsPUB62, OsRLCK91			A0A0P0VRD5	A0A0P0VRD5_ORYSJ	unreviewed	Os02g0822900 protein	Os02g0822900 OSNPB_020822900	ATP binding [GO:0005524]; protein kinase activity [GO:0004672]; ubiquitin-protein transferase activity [GO:0004842]		osa:4331192;	PF00069;PF04564;
8517	LOC_Os12g33090	35.0404	1.97173	0.420765	3.86e-07	4.05e-06	zinc finger family protein, putative, expressed	Os12g0515500	OsC3H67, OsTZF4, OsCCCH-Zn-7			Q2QPW2	C3H67_ORYSJ	reviewed	Zinc finger CCCH domain-containing protein 67 (OsC3H67)	Os12g0515500 LOC_Os12g33090	DNA binding [GO:0003677]; metal ion binding [GO:0046872]		osa:4352343;	PF00023;PF18044;
8249	LOC_Os12g03860	11.7807	1.97125	1.1412	0.00607244	0.0225052	major facilitator superfamily antiporter, putative, expressed	Os12g0132800	OsZIFL10, Os-mfs2, mfs2			H2KWY9	H2KWY9_ORYSJ	unreviewed	Major facilitator superfamily antiporter, putative, expressed	LOC_Os12g03860	integral component of membrane [GO:0016021]; transmembrane transport [GO:0055085]			PF07690;
8250	LOC_Os12g03860	11.7807	1.97125	1.1412	0.00607244	0.0225052	major facilitator superfamily antiporter, putative, expressed	Os12g0132800	OsZIFL10, Os-mfs2, mfs2			B7F8V5	B7F8V5_ORYSJ	unreviewed	Major facilitator superfamily antiporter, putative, expressed (cDNA, clone: J065177A21, full insert sequence)	LOC_Os12g03860	integral component of membrane [GO:0016021]; transmembrane transport [GO:0055085]			PF07690;
8251	LOC_Os12g03860	11.7807	1.97125	1.1412	0.00607244	0.0225052	major facilitator superfamily antiporter, putative, expressed	Os12g0132800	OsZIFL10, Os-mfs2, mfs2			H2KX70	H2KX70_ORYSJ	unreviewed	Major facilitator superfamily antiporter, putative, expressed	LOC_Os12g03860	integral component of membrane [GO:0016021]; transmembrane transport [GO:0055085]			PF07690;
8252	LOC_Os12g03860	11.7807	1.97125	1.1412	0.00607244	0.0225052	major facilitator superfamily antiporter, putative, expressed	Os12g0132800	OsZIFL10, Os-mfs2, mfs2			B9GBR4	B9GBR4_ORYSJ	unreviewed	Os12g0132800 protein	Os12g0132800 OsJ_35134	integral component of membrane [GO:0016021]; transmembrane transport [GO:0055085]			PF07690;
6715	LOC_Os08g44550	12.3293	1.96875	0.735666	0.000828699	0.00408009	expressed protein	Os08g0559800				A0A0P0XJC2	A0A0P0XJC2_ORYSJ	unreviewed	Os08g0559800 protein	Os08g0559800 OSNPB_080559800			osa:9270089;
4619	LOC_Os05g38264	108.203	1.96609	0.33117	3.7e-10	6.17e-09	expressed protein	Os05g0456900				Q60EL4	Q60EL4_ORYSJ	unreviewed	Os05g0456900 protein	Os05g0456900 OSNPB_050456900
5544	LOC_Os06g50920	857.437	1.96571	0.209981	1.09e-21	7.14e-20	protein kinase family protein, putative, expressed	Os06g0724900	OsILA1, OsACTPK4, ACTPK4			Q5Z986	Q5Z986_ORYSJ	unreviewed	Os06g0724900 protein (cDNA clone:J033068K18, full insert sequence)	Os06g0724900 OSNPB_060724900	ATP binding [GO:0005524]; protein serine/threonine kinase activity [GO:0004674]		osa:4342105;	PF07714;
4631	LOC_Os05g38800	17.3191	1.96465	0.557619	5.52e-05	0.000374362	PWWP domain containing protein, expressed	Os05g0463400				A0A0P0WNF2	A0A0P0WNF2_ORYSJ	unreviewed	Os05g0463400 protein (Fragment)	Os05g0463400 OSNPB_050463400				PF00855;
1341	LOC_Os02g05830	39.8874	1.96463	0.431968	7.29e-07	7.26e-06	ribulose bisphosphate carboxylase small chain, chloroplast precursor, putative, expressed	Os02g0152400	RbcS1, OsRBCS1, OsRbcS1			Q67IU5	Q67IU5_ORYSJ	unreviewed	Ribulose bisphosphate carboxylase small chain (EC 4.1.1.39)	Os02g0152400 OSNPB_020152400	plastid [GO:0009536]; monooxygenase activity [GO:0004497]; ribulose-bisphosphate carboxylase activity [GO:0016984]; carbon fixation [GO:0015977]; photorespiration [GO:0009853]; photosynthesis [GO:0015979]		osa:4328326;	PF00101;
737	LOC_Os01g52140	9.66517	1.96394	0.783123	0.00137682	0.00636766	expressed protein	Os01g0719400				Q5JL93	Q5JL93_ORYSJ	unreviewed	Os01g0719400 protein	Os01g0719400 OSNPB_010719400			osa:4324698;	PF09405;
6678	LOC_Os08g43490	21.1304	1.96381	0.569211	6.65e-05	0.000440023	heat shock protein DnaJ, putative, expressed	Os08g0548400	OsDjC66			Q6YT03	Q6YT03_ORYSJ	unreviewed	Os08g0548400 protein	Os08g0548400 OSNPB_080548400			osa:4346241;	PF00226;
7317	LOC_Os10g25040	8.97137	1.96343	1.13595	0.00605653	0.0224599	red chlorophyll catabolite reductase, putative, expressed	Os10g0389300	OsRCCR2, OsRCCR1, RCCR1			G9I8W2	G9I8W2_ORYSJ	unreviewed	Red chlorophyll catabolite reductase 2	RCCR2	red chlorophyll catabolite reductase activity [GO:0051743]		osa:107277220;	PF06405;
7318	LOC_Os10g25040	8.97137	1.96343	1.13595	0.00605653	0.0224599	red chlorophyll catabolite reductase, putative, expressed	Os10g0389300	OsRCCR2, OsRCCR1, RCCR1			A0A0P0XTS2	A0A0P0XTS2_ORYSJ	unreviewed	Os10g0389300 protein (Fragment)	Os10g0389300 OSNPB_100389300	chloroplast [GO:0009507]; red chlorophyll catabolite reductase activity [GO:0051743]; chlorophyll catabolic process [GO:0015996]			PF06405;
4531	LOC_Os05g33554	6.44092	1.96077	0.961196	0.00436114	0.0171336	methyl-binding domain protein MBD, putative, expressed	Os05g0404700				Q0DIA3	Q0DIA3_ORYSJ	unreviewed	Os05g0404700 protein	Os05g0404700 OSNPB_050404700	nucleus [GO:0005634]; DNA binding [GO:0003677]; zinc ion binding [GO:0008270]		osa:4338749;	PF01429;PF07496;
558	LOC_Os01g42690	213.595	1.96073	0.201007	2.41e-23	1.9e-21	OsPOP2 - Putative Prolyl Oligopeptidase homologue, expressed	Os01g0612500	OsPOP2, POP2			Q5ZDZ4	Q5ZDZ4_ORYSJ	unreviewed	Lysophospholipase 2-like (Os01g0612500 protein)	Os01g0612500 P0046B10.25 P0410E01.6	hydrolase activity [GO:0016787]			PF02230;
559	LOC_Os01g42690	213.595	1.96073	0.201007	2.41e-23	1.9e-21	OsPOP2 - Putative Prolyl Oligopeptidase homologue, expressed	Os01g0612500	OsPOP2, POP2			B9EY14	B9EY14_ORYSJ	unreviewed	Abhydrolase_2 domain-containing protein	OsJ_02584	hydrolase activity [GO:0016787]		osa:4325318;	PF02230;
90	LOC_Os01g05490	7305.47	1.96066	0.207179	3.65e-22	2.52e-20	triosephosphate isomerase, cytosolic, putative, expressed	Os01g0147900	tpi*, tips, TI, OsTPI1, TPI1, OsTPI1.1, OsTPI1.2			P48494	TPIS_ORYSJ	reviewed	Triosephosphate isomerase, cytosolic (TIM) (Triose-phosphate isomerase) (EC 5.3.1.1)	TPI Os01g0147900 LOC_Os01g05490 OsJ_00367 P0416D03.45 P0434B04.9	cytosol [GO:0005829]; triose-phosphate isomerase activity [GO:0004807]; gluconeogenesis [GO:0006094]; glyceraldehyde-3-phosphate biosynthetic process [GO:0046166]; glycerol catabolic process [GO:0019563]; glycolytic process [GO:0006096]	SUBCELLULAR LOCATION: Cytoplasm {ECO:0000305}.	osa:4325211;	PF00121;
543	LOC_Os01g41820	10.447	1.96051	0.971371	0.00394809	0.0157374	cytochrome P450 72A1, putative, expressed	Os01g0602500				A2ZV50	A2ZV50_ORYSJ	unreviewed	Uncharacterized protein	OsJ_02504	heme binding [GO:0020037]; iron ion binding [GO:0005506]; monooxygenase activity [GO:0004497]; oxidoreductase activity, acting on paired donors, with incorporation or reduction of molecular oxygen [GO:0016705]			PF00067;
293	LOC_Os01g15470	401.135	1.95962	0.173168	1.62e-30	2.4e-28	protein kinase, putative, expressed	Os01g0259200	OsRLCK28			Q5NAV8	Q5NAV8_ORYSJ	unreviewed	Os01g0259200 protein	Os01g0259200 OSNPB_010259200	plasma membrane [GO:0005886]; ATP binding [GO:0005524]; transmembrane receptor protein serine/threonine kinase activity [GO:0004675]; protein phosphorylation [GO:0006468]		osa:4326237;	PF00069;
294	LOC_Os01g15470	401.135	1.95962	0.173168	1.62e-30	2.4e-28	protein kinase, putative, expressed	Os01g0259200	OsRLCK28			A0A0P0V188	A0A0P0V188_ORYSJ	unreviewed	Os01g0259200 protein (Fragment)	Os01g0259200 OSNPB_010259200	ATP binding [GO:0005524]; protein serine/threonine kinase activity [GO:0004674]			PF00069;
391	LOC_Os01g24010	45.7282	1.95897	0.470789	3.97e-06	3.47e-05	pleiotropic drug resistance protein, putative, expressed	Os01g0342750				Q8LQX2	AB32G_ORYSJ	reviewed	ABC transporter G family member 32 (OsABCG32) (Pleiotropic drug resistance protein 16) (OsPDR16)	ABCG32 PDR16 PDR5 Os01g0342700 LOC_Os01g24010 B1045F02.15	integral component of membrane [GO:0016021]; plasma membrane [GO:0005886]; ATP binding [GO:0005524]; ATPase activity [GO:0016887]; ATPase-coupled transmembrane transporter activity [GO:0042626]; transmembrane transport [GO:0055085]	SUBCELLULAR LOCATION: Membrane {ECO:0000255}; Multi-pass membrane protein {ECO:0000255}.	osa:4326812;	PF01061;PF00005;PF14510;PF08370;
5762	LOC_Os07g18240	4.35219	1.95727	1.41516	0.0130478	0.0426231	lectin-like receptor kinase, putative, expressed	Os07g0283125				A3BIM8	A3BIM8_ORYSJ	unreviewed	Os07g0283125 protein	Os07g0283125 OsJ_23853	integral component of membrane [GO:0016021]; ATP binding [GO:0005524]; carbohydrate binding [GO:0030246]; protein kinase activity [GO:0004672]			PF00139;PF00069;
2603	LOC_Os03g17470	286.959	1.95725	0.2039	1.09e-22	8.12e-21	IN2-1 protein, putative, expressed	Os03g0283100	OsGSTL2			Q8H8U5	IN21B_ORYSJ	reviewed	Protein IN2-1 homolog B (Glutathione S-transferase GSTZ5)	GSTZ5 Os03g0283100 LOC_Os03g17470	protein glutathionylation [GO:0010731]		osa:4332455;	PF13417;
8112	LOC_Os11g40840	18.8382	1.956	0.659014	0.000339981	0.00187587	receptor-like protein kinase 2 precursor, putative, expressed	NA	NA			Q2R0Z9	Q2R0Z9_ORYSJ	unreviewed	Leucine Rich Repeat family protein	LOC_Os11g40840				PF13516;PF13855;PF08263;
4265	LOC_Os05g05020	101.304	1.95342	0.325194	2.49e-10	4.27e-09	expressed protein	Os05g0142000				Q75KG1	Q75KG1_ORYSJ	unreviewed	Os05g0142000 protein (cDNA clone:J023107H06, full insert sequence)	Os05g0142000 OSNPB_050142000			osa:4337766;
216	LOC_Os01g10780	16.9797	1.95292	0.544673	4.58e-05	0.000316512	expressed protein	NA	NA			Q9LWN5	Q9LWN5_ORYSJ	unreviewed	Os01g0205000 protein	Os01g0205000 OSNPB_010205000
5722	LOC_Os07g10840	45.8902	1.95245	0.492869	8.92e-06	7.25e-05	uncharacterized glycosyltransferase, putative, expressed	Os07g0209100				Q6ZLJ9	Q6ZLJ9_ORYSJ	unreviewed	Os07g0209100 protein	Os07g0209100 OSNPB_070209100	raffinose alpha-galactosidase activity [GO:0052692]		osa:4342703;	PF05691;
5959	LOC_Os07g38810	55.8131	1.95133	0.337369	1.07e-09	1.66e-08	lectin receptor-type protein kinase, putative, expressed	Os07g0575700	SIT3			Q7F226	Q7F226_ORYSJ	unreviewed	Os07g0575700 protein	Os07g0575700 OSNPB_070575700	integral component of membrane [GO:0016021]; plasma membrane [GO:0005886]; ATP binding [GO:0005524]; carbohydrate binding [GO:0030246]; transmembrane receptor protein serine/threonine kinase activity [GO:0004675]; defense response [GO:0006952]; defense response to bacterium [GO:0042742]; defense response to oomycetes [GO:0002229]			PF00139;PF00069;
3436	LOC_Os04g09670	14.8038	1.94862	0.582689	0.000107888	0.000673838	O-methyltransferase, putative, expressed	Os04g0176200				A0A0P0W7B2	A0A0P0W7B2_ORYSJ	unreviewed	Os04g0176200 protein	Os04g0176200 OSNPB_040176200	O-methyltransferase activity [GO:0008171]; S-adenosylmethionine-dependent methyltransferase activity [GO:0008757]; aromatic compound biosynthetic process [GO:0019438]; methylation [GO:0032259]			PF00891;
6648	LOC_Os08g41910	31.44	1.94841	0.443657	1.46e-06	1.38e-05	Sua5/YciO/YrdC/YwlC family protein, putative, expressed	Os08g0531300				Q6YZF2	Q6YZF2_ORYSJ	unreviewed	Os08g0531300 protein	Os08g0531300 OSNPB_080531300	double-stranded RNA binding [GO:0003725]		osa:4346132;	PF01300;
3468	LOC_Os04g13210	73.5001	1.94772	0.306777	3.14e-11	6.1e-10	multidrug resistance-associated protein, putative, expressed	Os04g0209200	OsABCC9, ABCC9, OsMRP9, OsABCC14, ABCC14			A0A5S6R7H3	A0A5S6R7H3_ORYSJ	unreviewed	OSJNBa0035O13.14 protein	OSJNBa0035O13.14	integral component of membrane [GO:0016021]; ATP binding [GO:0005524]; ATPase activity [GO:0016887]; ATPase-coupled transmembrane transporter activity [GO:0042626]		osa:4335176;	PF00664;PF00005;
3114	LOC_Os03g53730	5.70141	1.94612	1.07563	0.00687681	0.0250175	flavoprotein wrbA, putative, expressed	Os03g0748500	OS-QR			Q10CV9	Q10CV9_ORYSJ	unreviewed	Flavodoxin family protein, expressed	LOC_Os03g53730	FMN binding [GO:0010181]; NAD(P)H dehydrogenase (quinone) activity [GO:0003955]		osa:4334108;	PF03358;
4881	LOC_Os05g51470	215.006	1.93762	0.233497	1.52e-17	6.59e-16	2-aminoethanethiol dioxygenase, putative, expressed	Os05g0592300				Q0DFG5	Q0DFG5_ORYSJ	unreviewed	Os05g0592300 protein (cDNA clone:J013155I19, full insert sequence)	Os05g0592300 OSNPB_050592300	oxidoreductase activity, acting on single donors with incorporation of molecular oxygen, incorporation of two atoms of oxygen [GO:0016702]		osa:4339793;	PF07847;
5302	LOC_Os06g38580	19.1062	1.93658	0.512542	2.19e-05	0.000163533	expressed protein	NA	NA			Q5VP86	Q5VP86_ORYSJ	unreviewed	Uncharacterized protein	OsJ_21806 P0498C03.47	integral component of membrane [GO:0016021]
545	LOC_Os01g42030	496.986	1.93575	0.154052	4.65e-37	1.12e-34	mitochondrial chaperone BCS1, putative, expressed	Os01g0605100				A2ZV72	A2ZV72_ORYSJ	unreviewed	AAA domain-containing protein	OsJ_02530	ATP binding [GO:0005524]		osa:4324105;	PF00004;PF14363;
249	LOC_Os01g12464	53.0117	1.93376	0.425803	7.02e-07	7.03e-06	CHCH domain containing protein, expressed	Os01g0224300				Q5NAG7	Q5NAG7_ORYSJ	unreviewed	Os01g0224300 protein	Os01g0224300 OSNPB_010224300			osa:4326731;
5235	LOC_Os06g31090	12.7261	1.93375	0.667093	0.000448588	0.00239684	GAMYB-binding protein, putative, expressed	Os06g0507300				A3BC60	A3BC60_ORYSJ	unreviewed	GAMYB-binding protein-like (Os06g0507300 protein)	Os06g0507300 OsJ_21491 P0561B08.18	nucleus [GO:0005634]; response to red light [GO:0010114]		osa:4341136;
7193	LOC_Os10g04520	11.8155	1.93297	0.674094	0.000504982	0.002655	expressed protein	NA	NA			B9G7E6	B9G7E6_ORYSJ	unreviewed	Rx_N domain-containing protein	OsJ_30637			osa:4348051;	PF18052;
5704	LOC_Os07g09384	2.63706	1.93291	2.1265	0.0155065	0.0491243	expressed protein	Os07g0191600	STR2			A0A0P0X3A1	A0A0P0X3A1_ORYSJ	unreviewed	Os07g0191600 protein (Fragment)	Os07g0191600 OSNPB_070191600				PF04601;
775	LOC_Os01g53630	7.86393	1.93135	0.819527	0.00213549	0.00933982	ulp1 protease family protein, putative, expressed	Os01g0738100	OsOTS3			B9EZL0	B9EZL0_ORYSJ	unreviewed	ULP_PROTEASE domain-containing protein	OsJ_03386	cysteine-type peptidase activity [GO:0008234]		osa:4327883;	PF02902;
7801	LOC_Os11g06234	25.4055	1.9191	0.478385	8.15e-06	6.66e-05	expressed protein	Os11g0161133				Q53PM2	Q53PM2_ORYSJ	unreviewed	NB-ARC domain, putative
8303	LOC_Os12g06440	25.2268	1.91646	0.466907	5.56e-06	4.7e-05	expressed protein	Os12g0161500				Q2QXD1	Q2QXD1_ORYSJ	unreviewed	Expressed protein	LOC_Os12g06440
1012	LOC_Os01g64520	910.524	1.91301	0.238078	1.32e-16	5.15e-15	uricase, putative, expressed	Os01g0865100	OsUO			Q94CU3	Q94CU3_ORYSJ	unreviewed	Uricase (EC 1.7.3.3) (Urate oxidase)	Os01g0865100 OSNPB_010865100	peroxisome [GO:0005777]; urate oxidase activity [GO:0004846]; peroxisome organization [GO:0007031]; purine nucleobase metabolic process [GO:0006144]; urate catabolic process [GO:0019628]	SUBCELLULAR LOCATION: Peroxisome {ECO:0000256|PIRNR:PIRNR000241}.	osa:4324793;	PF01014;
927	LOC_Os01g60680	21.2352	1.90947	0.492254	1.46e-05	0.000112601	expressed protein	NA	NA			Q8RV66	Q8RV66_ORYSJ	unreviewed	Uncharacterized protein	P0485B12.20 P0703B11.29
5315	LOC_Os06g39330	13.8878	1.90648	0.733091	0.00101888	0.00488977	UDP-glucoronosyl and UDP-glucosyl transferase domain containing protein, expressed	Os06g0593800				Q69UF5	Q69UF5_ORYSJ	unreviewed	Glycosyltransferase (EC 2.4.1.-)	Os06g0593800 OSNPB_060593800	intracellular membrane-bounded organelle [GO:0043231]; transferase activity, transferring hexosyl groups [GO:0016758]; UDP-glycosyltransferase activity [GO:0008194]		osa:4341423;	PF00201;
3645	LOC_Os04g36740	132.517	1.90404	0.213326	6.62e-20	3.65e-18	potassium channel SKOR, putative, expressed	Os04g0445000	OsSKOR, OsK5.1, K5.1			A3AU76	A3AU76_ORYSJ	unreviewed	Uncharacterized protein	OsJ_14938	integral component of membrane [GO:0016021]; ion channel activity [GO:0005216]			PF12796;PF00027;PF00520;
6130	LOC_Os07g47790	15.6429	1.90308	0.769538	0.00132633	0.00616225	AP2 domain containing protein, expressed	Os07g0674800	OsERF#067, OsERF067, OsERF67, AP2/EREBP#076, AP2/EREBP76			Q6ZDW4	Q6ZDW4_ORYSJ	unreviewed	AP2 domain transcription factor EREBP	P0618H09.16	nucleus [GO:0005634]; DNA binding [GO:0003677]; DNA-binding transcription factor activity [GO:0003700]	SUBCELLULAR LOCATION: Nucleus {ECO:0000256|SAAS:SAAS00550310}.	osa:4344266;	PF00847;
7996	LOC_Os11g29420	1.91028	1.90054	5.35382	0.0116422	0.0387534	LTPL30 - Protease inhibitor/seed storage/LTP family protein precursor, putative, expressed	Os11g0484700	OsLTPd12, OsLtpVI.4			Q2R478	Q2R478_ORYSJ	unreviewed	Protease inhibitor/seed storage/LTP family protein	LOC_Os11g29420			osa:107277424;	PF14368;
3458	LOC_Os04g11400	283.714	1.89998	0.207562	8.2e-21	4.94e-19	expressed protein	Os04g0191500				Q0JEX0	Q0JEX0_ORYSJ	unreviewed	Os04g0191500 protein (Fragment)	Os04g0191500 OSNPB_040191500	integral component of membrane [GO:0016021]
3459	LOC_Os04g11400	283.714	1.89998	0.207562	8.2e-21	4.94e-19	expressed protein	Os04g0191500				Q7XSK6	Q7XSK6_ORYSJ	unreviewed	OSJNBa0059D20.12 protein	OSJNBa0059D20.12	integral component of membrane [GO:0016021]
3830	LOC_Os04g45480	7.2566	1.89788	0.946205	0.00460317	0.0179285	heat shock protein STI, putative, expressed	Os04g0538000	OsHop/Sti1b, Hop/Sti1b, Sti1b			A0A0P0WD35	A0A0P0WD35_ORYSJ	unreviewed	Os04g0538000 protein (Fragment)	Os04g0538000 OSNPB_040538000	Hsp90 protein binding [GO:0051879]			PF17830;PF00515;PF07719;
1083	LOC_Os01g67010	18.1014	1.89747	0.691559	0.000662222	0.00336323	expressed protein	Os01g0895200				Q7F438	Q7F438_ORYSJ	unreviewed	Membrane protein-like	B1078G07.53	integral component of membrane [GO:0016021]; oxidation-reduction process [GO:0055114]		osa:4324968;
1854	LOC_Os02g43540	13.3104	1.89429	0.650645	0.000438665	0.00235001	retrotransposon protein, putative, unclassified, expressed	Os02g0651900				Q6H3Y0	Q6H3Y0_ORYSJ	unreviewed	Os02g0651900 protein (cDNA clone:J033055A02, full insert sequence) (cDNA clone:J033115D03, full insert sequence)	Os02g0651900 OSNPB_020651900			osa:4330171;
1357	LOC_Os02g06490	9.33405	1.89424	0.763275	0.00154774	0.0070549	vacuolar protein sorting-associated protein 4, putative, expressed	Os02g0159900				Q6ETH5	Q6ETH5_ORYSJ	unreviewed	Os02g0159900 protein	Os02g0159900 OSNPB_020159900	nucleus [GO:0005634]; ATP binding [GO:0005524]; ATPase activity [GO:0016887]; vacuole organization [GO:0007033]		osa:4328374;	PF00004;PF04212;PF09336;
2601	LOC_Os03g17370	14.981	1.89242	0.634942	0.000346592	0.00190716	white-brown complex homolog protein, putative, expressed	Os03g0282100	OsABCG6			Q8H8V5	Q8H8V5_ORYSJ	unreviewed	ABC transporter family protein, putative	LOC_Os03g17370	integral component of membrane [GO:0016021]; ATP binding [GO:0005524]; ATPase activity [GO:0016887]		osa:107276687;	PF01061;PF00005;
8563	LOC_Os12g37519	101.601	1.89221	0.256501	2.46e-14	7.18e-13	retrotransposon protein, putative, unclassified, expressed	NA	NA			Q0IMM1	Q0IMM1_ORYSJ	unreviewed	Os12g0562000 protein	Os12g0562000			osa:4352521;
3500	LOC_Os04g21890	77.9454	1.88946	0.349652	9.55e-09	1.27e-07	disease resistance protein RPM1, putative, expressed	NA	NA			Q7XNH7	Q7XNH7_ORYSJ	unreviewed	OSJNBb0032D24.16 protein	OsJ_14145 OSJNBb0032D24.16	ADP binding [GO:0043531]		osa:107278355;	PF00931;PF18052;
1479	LOC_Os02g13420	39.3558	1.88814	0.464554	6.58e-06	5.47e-05	leucine-rich repeat receptor protein kinase EXS precursor, putative, expressed	Os02g0227600				B9F4E2	B9F4E2_ORYSJ	unreviewed	Uncharacterized protein	OsJ_05961			osa:9271199;	PF00560;PF13855;
1276	LOC_Os02g02120	15.945	1.88517	0.726278	0.00104656	0.00500586	OsWAK11 - OsWAK receptor-like protein kinase, expressed	Os02g0111600	OsWAK11			A0A0P0VE02	A0A0P0VE02_ORYSJ	unreviewed	Os02g0111600 protein	Os02g0111600	integral component of membrane [GO:0016021]; plasma membrane [GO:0005886]; ATP binding [GO:0005524]; calcium ion binding [GO:0005509]; polysaccharide binding [GO:0030247]; protein serine/threonine kinase activity [GO:0004674]; cell surface receptor signaling pathway [GO:0007166]; protein phosphorylation [GO:0006468]		osa:4328047;	PF07645;PF13947;PF00069;
7918	LOC_Os11g15520	21.1321	1.88095	0.501441	2.41e-05	0.00017761	OsSub62 - Putative Subtilisin homologue, expressed	Os11g0261600	OsSub62, SUB62			Q53L08	Q53L08_ORYSJ	unreviewed	Subtilase family, putative	LOC_Os11g15520	serine-type endopeptidase activity [GO:0004252]			PF17766;PF00082;
6185	LOC_Os08g01480	7.28488	1.88072	0.97482	0.00536566	0.0203636	cytochrome P450, putative, expressed	Os08g0105700				A0A0P0XAR6	A0A0P0XAR6_ORYSJ	unreviewed	Putative P450	OJ1300_E01.16 P0450B04.1	integral component of membrane [GO:0016021]; heme binding [GO:0020037]; iron ion binding [GO:0005506]; oxidoreductase activity, acting on paired donors, with incorporation or reduction of molecular oxygen [GO:0016705]			PF00067;
8178	LOC_Os11g47570	14.2687	1.87895	0.988822	0.00490422	0.0189163	glycosyl hydrolase, putative, expressed	Os11g0701600				Q2QZ61	Q2QZ61_ORYSJ	unreviewed	Xylanase inhibitor protein 2, putative, expressed	LOC_Os11g47570	hydrolase activity, acting on glycosyl bonds [GO:0016798]; xylan catabolic process [GO:0045493]		osa:4351192;	PF00704;
6985	LOC_Os09g29200	411.504	1.87713	0.164594	5.75e-31	8.97e-29	glutathione S-transferase, putative, expressed	Os09g0467200	OsGSTU17, OsGST23, GST23			Q0J128	Q0J128_ORYSJ	unreviewed	Os09g0467200 protein (Putative glutathione S-transferase)	Os09g0467200 OJ1005_D12.39 OsJ_29684 P0676H02.1	cytoplasm [GO:0005737]; glutathione transferase activity [GO:0004364]; glutathione metabolic process [GO:0006749]		osa:4347319;	PF00043;PF02798;
5188	LOC_Os06g21570	37.6689	1.87669	0.401867	4.47e-07	4.63e-06	Os6bglu24 - beta-glucosidase homologue, similar to G. max isohydroxyurate hydrolase, expressed	Os06g0320200	Os6bglu24, Os6BGlu24			Q5Z9Z0	BGL24_ORYSJ	reviewed	Beta-glucosidase 24 (Os6bglu24) (EC 3.2.1.21)	BGLU24 Os06g0320200 LOC_Os06g21570 OsJ_21154 P0592B08.35	beta-glucosidase activity [GO:0008422]; scopolin beta-glucosidase activity [GO:0102483]; carbohydrate metabolic process [GO:0005975]		osa:4340890;	PF00232;
5968	LOC_Os07g39270	235.769	1.8738	0.269621	5.34e-13	1.3e-11	polyprenyl synthetase, putative, expressed	Os07g0580900	OsGGPPS1			Q7XI92	Q7XI92_ORYSJ	unreviewed	Os07g0580900 protein (cDNA clone:J023007O22, full insert sequence) (cDNA clone:J033030K23, full insert sequence)	Os07g0580900 OSNPB_070580900	farnesyltranstransferase activity [GO:0004311]; prenyltransferase activity [GO:0004659]; isoprenoid biosynthetic process [GO:0008299]		osa:4343721;	PF00348;
7954	LOC_Os11g23080	15.7094	1.87169	0.690296	0.000789976	0.00391879	retrotransposon protein, putative, unclassified, expressed	NA	NA			Q2R5W8	Q2R5W8_ORYSJ	unreviewed	Rtac1	LOC_Os11g23080
7955	LOC_Os11g23080	15.7094	1.87169	0.690296	0.000789976	0.00391879	retrotransposon protein, putative, unclassified, expressed	NA	NA			Q2R5W9	Q2R5W9_ORYSJ	unreviewed	Rtac1	LOC_Os11g23080
8675	LOC_Os12g42960	19.2589	1.87113	0.495873	2.32e-05	0.000171533	expressed protein	Os12g0624800				Q0ILS9	Q0ILS9_ORYSJ	unreviewed	Os12g0624800 protein	Os12g0624800	integral component of membrane [GO:0016021]; microtubule [GO:0005874]; microtubule binding [GO:0008017]		osa:4352837;
331	LOC_Os01g18360	16.3332	1.86704	0.544686	8.53e-05	0.000545874	OsIAA4 - Auxin-responsive Aux/IAA gene family member, expressed	Os01g0286900	OsIAA4			A2ZRY8	IAA4_ORYSJ	reviewed	Auxin-responsive protein IAA4 (Indoleacetic acid-induced protein 4)	IAA4 IAA20 Os01g0286900 LOC_Os01g18360 OsJ_001310	nucleus [GO:0005634]; auxin-activated signaling pathway [GO:0009734]; regulation of transcription, DNA-templated [GO:0006355]	SUBCELLULAR LOCATION: Nucleus {ECO:0000250}.	osa:4327919;	PF02309;
2892	LOC_Os03g39690	68.571	1.86242	0.278893	3.73e-12	8.25e-11	cytochrome P450, putative, expressed	Os03g0594100				Q851G2	Q851G2_ORYSJ	unreviewed	Cytochrome P450 family protein, expressed (Os03g0594100 protein) (cDNA clone:002-183-A07, full insert sequence)	LOC_Os03g39690 Os03g0594100 OSNPB_030594100	membrane [GO:0016020]; heme binding [GO:0020037]; iron ion binding [GO:0005506]; oxidoreductase activity, acting on paired donors, with incorporation or reduction of molecular oxygen, NAD(P)H as one donor, and incorporation of one atom of oxygen [GO:0016709]		osa:4333365;	PF00067;
2162	LOC_Os02g56810	26.4162	1.85882	0.428225	2.11e-06	1.94e-05	OsFBX68 - F-box domain containing protein, expressed	Os02g0813083	OsFbox118, Os_F0460			Q6K3F2	Q6K3F2_ORYSJ	unreviewed	Uncharacterized protein OSJNBa0053L11.21	OSJNBa0053L11.21				PF14299;
2163	LOC_Os02g56810	26.4162	1.85882	0.428225	2.11e-06	1.94e-05	OsFBX68 - F-box domain containing protein, expressed	Os02g0813000	OsFbox118, Os_F0460, OsFbox119, Os_F0693			Q6K3F2	Q6K3F2_ORYSJ	unreviewed	Uncharacterized protein OSJNBa0053L11.21	OSJNBa0053L11.21				PF14299;
8681	LOC_Os12g43440	28.7248	1.85771	0.461952	7.82e-06	6.4e-05	thaumatin, putative, expressed	Os12g0630100				Q0ILR1	Q0ILR1_ORYSJ	unreviewed	Os12g0630100 protein	Os12g0630100	extracellular region [GO:0005576]; defense response [GO:0006952]		osa:4352856;	PF00314;
1547	LOC_Os02g17710	18.5461	1.85725	0.532851	6.85e-05	0.000452302	receptor-like protein kinase 5 precursor, putative, expressed	Os02g0277700				A0A0P0VHL9	A0A0P0VHL9_ORYSJ	unreviewed	Os02g0277700 protein (Fragment)	Os02g0277700 OSNPB_020277700	integral component of membrane [GO:0016021]; plasma membrane [GO:0005886]; hormone-mediated signaling pathway [GO:0009755]			PF00560;PF13516;PF13855;PF08263;
7519	LOC_Os10g38090	515.89	1.85716	0.183284	5.86e-25	5.42e-23	cytochrome P450, putative, expressed	Os10g0524700				Q7G234	Q7G234_ORYSJ	unreviewed	Cytochrome P450 family protein, expressed (Os10g0524700 protein)	LOC_Os10g38090 Os10g0524700 OSNPB_100524700	integral component of membrane [GO:0016021]; heme binding [GO:0020037]; iron ion binding [GO:0005506]; oxidoreductase activity, acting on paired donors, with incorporation or reduction of molecular oxygen [GO:0016705]		osa:4349164;	PF00067;
7180	LOC_Os10g03620	18.4662	1.85525	0.532802	7e-05	0.000458996	OsFBX344 - F-box domain containing protein, expressed	Os10g0124700	OsFbox508, Os_F0127			Q33BA9	Q33BA9_ORYSJ	unreviewed	F-box domain containing protein, expressed (Os10g0124700 protein)	LOC_Os10g03620 Os10g0124700 OSNPB_100124700			osa:4348011;	PF00646;
3107	LOC_Os03g53220	14.1361	1.85443	0.611649	0.000325853	0.00180875	U5 small nuclear ribonucleoprotein 200 kDa helicase, putative, expressed	Os03g0743800				A0A0P0W3G5	A0A0P0W3G5_ORYSJ	unreviewed	Putative Sec63 domain containing protein	OSJNBb0036F07.6	catalytic step 2 spliceosome [GO:0071013]; nucleus [GO:0005634]; post-mRNA release spliceosomal complex [GO:0071014]; spliceosomal complex [GO:0005681]; U4/U6 x U5 tri-snRNP complex [GO:0046540]; U5 snRNP [GO:0005682]; ATP binding [GO:0005524]; helicase activity [GO:0004386]; nucleic acid binding [GO:0003676]; RNA helicase activity [GO:0003724]; mRNA splicing, via spliceosome [GO:0000398]; splice…			PF00270;PF18149;PF02889;
3178	LOC_Os03g56580	42.0146	1.85341	0.373671	1.03e-07	1.18e-06	no apical meristem protein, putative, expressed	Os03g0777000	ONAC066, ONAC66			Q0DN36	Q0DN36_ORYSJ	unreviewed	Os03g0777000 protein (Putative NAC domain protein) (Putative NAM (No apical meristem) protein)	OSJNBa0010I09.1 Os03g0777000 OsJ_12786 OSJNBa0070N04.8	nucleus [GO:0005634]; DNA binding [GO:0003677]; regulation of transcription, DNA-templated [GO:0006355]		osa:4334294;	PF02365;
212	LOC_Os01g10450	345.419	1.85289	0.206832	5.07e-20	2.83e-18	protein kinase domain containing protein, expressed	Os01g0201200				Q8L650	Q8L650_ORYSJ	unreviewed	Os01g0201200 protein	Os01g0201200 OSNPB_010201200	ATP binding [GO:0005524]; protein serine/threonine kinase activity [GO:0004674]		osa:4327068;	PF07714;
8032	LOC_Os11g32870	8.9741	1.85248	0.957163	0.00517104	0.0197544	expressed protein	Os11g0533000				C7J995	C7J995_ORYSJ	unreviewed	Os11g0533000 protein	Os11g0533000
1946	LOC_Os02g47770	4.62438	1.85222	1.12969	0.0102496	0.0348729	ZF-HD protein dimerisation region containing protein, expressed	Os02g0706600	OsZHD7			Q8S3Q9	ZHD7_ORYSJ	reviewed	Zinc-finger homeodomain protein 7 (OsZHD7)	ZHD7 Os02g0706600 LOC_Os02g47770 49D11.22 OSJNBb0060O16.6 P0680A05.32	nucleus [GO:0005634]; DNA binding [GO:0003677]; metal ion binding [GO:0046872]	SUBCELLULAR LOCATION: Nucleus {ECO:0000250}.	osa:4330466;	PF04770;
6906	LOC_Os09g25090	27.6116	1.84992	0.500652	2.83e-05	0.000205278	CAMK_KIN1/SNF1/Nim1_like.34 - CAMK includes calcium/calmodulin depedent protein kinases, expressed	Os09g0418000	OsCIPK16			Q6ERS4	CIPKG_ORYSJ	reviewed	CBL-interacting protein kinase 16 (EC 2.7.11.1) (OsCIPK16)	CIPK16 Os09g0418000 LOC_Os09g25090 P0701F11.5-1	ATP binding [GO:0005524]; protein serine/threonine kinase activity [GO:0004674]; hyperosmotic salinity response [GO:0042538]; signal transduction [GO:0007165]; sodium ion transport [GO:0006814]		osa:4347071;	PF03822;PF00069;
5796	LOC_Os07g26660	83.0269	1.84834	0.33143	3.54e-09	5.09e-08	aquaporin protein, putative, expressed	Os07g0448400	OsPIP2;5, PIP2-5			Q8GRI8	PIP25_ORYSJ	reviewed	Aquaporin PIP2-5 (OsPIP2;5) (Plasma membrane intrinsic protein 2-5)	PIP2-5 Os07g0448400 LOC_Os07g26660 OJ1047_A06.108-1 OsJ_023143 P0475E07.134-1	integral component of membrane [GO:0016021]; plasma membrane [GO:0005886]; water channel activity [GO:0015250]	SUBCELLULAR LOCATION: Cell membrane {ECO:0000250}; Multi-pass membrane protein {ECO:0000250}.	osa:4343121;	PF00230;
7799	LOC_Os11g06140	22.4842	1.84815	0.494109	2.5e-05	0.000183166	serine/threonine-protein kinase WNK4, putative, expressed	Os11g0160300	OsWNK6			Q2RA93	WNK6_ORYSJ	reviewed	Probable serine/threonine-protein kinase WNK6 (OsWNK6) (EC 2.7.11.1) (Protein kinase with no lysine 6)	WNK6 Os11g0160300 LOC_Os11g06140 OsJ_031733	cytoplasm [GO:0005737]; ATP binding [GO:0005524]; protein serine/threonine kinase activity [GO:0004674]; intracellular signal transduction [GO:0035556]; protein phosphorylation [GO:0006468]		osa:4349847;	PF00069;
3142	LOC_Os03g55280	343.145	1.84576	0.214132	1e-18	4.98e-17	semialdehyde dehydrogenase, NAD binding domain containing protein, putative, expressed	Os03g0760700				Q93Y73	Q93Y73_ORYSJ	unreviewed	Aspartate-semialdehyde dehydrogenase family protein, expressed (Os03g0760700 protein)	LOC_Os03g55280 Os03g0760700 OSNPB_030760700	chloroplast stroma [GO:0009570]; mitochondrion [GO:0005739]; aspartate-semialdehyde dehydrogenase activity [GO:0004073]; NAD binding [GO:0051287]; NADP binding [GO:0050661]; protein dimerization activity [GO:0046983]; isoleucine biosynthetic process [GO:0009097]; lysine biosynthetic process via diaminopimelate [GO:0009089]; methionine biosynthetic process [GO:0009086]; threonine biosynthetic proc…		osa:4334188;	PF01118;PF02774;
3632	LOC_Os04g35790	43.3367	1.84182	0.402312	6.85e-07	6.88e-06	GLTP domain containing protein, putative, expressed	Os04g0438600				A0A0P0WAH7	A0A0P0WAH7_ORYSJ	unreviewed	Os04g0438600 protein	Os04g0438600	cytosol [GO:0005829]; membrane [GO:0016020]; ceramide 1-phosphate binding [GO:1902387]; ceramide 1-phosphate transfer activity [GO:1902388]; lipid binding [GO:0008289]; ceramide transport [GO:0035627]; intermembrane lipid transfer [GO:0120009]			PF08718;
3633	LOC_Os04g35790	43.3367	1.84182	0.402312	6.85e-07	6.88e-06	GLTP domain containing protein, putative, expressed	Os04g0438600				B9FFB5	B9FFB5_ORYSJ	unreviewed	GLTP domain-containing protein	OsJ_14904	cytoplasm [GO:0005737]; lipid transfer activity [GO:0120013]; intermembrane lipid transfer [GO:0120009]			PF08718;
4177	LOC_Os05g01370	36.0429	1.84128	0.40296	7.04e-07	7.04e-06	polygalacturonase inhibitor precursor, putative, expressed	Os05g0104150	Ospgip2, pgip2, OsPGIP2			Q0DLF8	Q0DLF8_ORYSJ	unreviewed	Os05g0104200 protein	Os05g0104200			osa:4337548;	PF13855;PF08263;
7754	LOC_Os11g04104	170.067	1.84052	0.242198	4.48e-15	1.45e-13	major facilitator superfamily antiporter, putative, expressed	Os11g0135900	OsZIFL7, OsTOM3, TOM3			Q0IUT5	Q0IUT5_ORYSJ	unreviewed	Os11g0135900 protein	Os11g0135900 OsJ_32870	integral component of membrane [GO:0016021]; transmembrane transport [GO:0055085]			PF07690;
7755	LOC_Os11g04104	170.067	1.84052	0.242198	4.48e-15	1.45e-13	major facilitator superfamily antiporter, putative, expressed	Os11g0135900	OsZIFL7, OsTOM3, TOM3			H2KVX5	H2KVX5_ORYSJ	unreviewed	Transporter, putative, expressed	LOC_Os11g04104	integral component of membrane [GO:0016021]; transmembrane transport [GO:0055085]		osa:4349708;	PF07690;
605	LOC_Os01g45520	18.3457	1.8381	0.516945	5.37e-05	0.000365801	D-mannose binding lectin family protein, expressed	Os01g0642801				Q5VNX4	Q5VNX4_ORYSJ	unreviewed	Receptor-like serine/threonine-protein kinase (EC 2.7.11.1)	OsJ_02791 P0039G05.34 P0510C12.19	integral component of membrane [GO:0016021]; ATP binding [GO:0005524]; protein serine/threonine kinase activity [GO:0004674]; recognition of pollen [GO:0048544]			PF01453;PF00069;PF00954;
606	LOC_Os01g45520	18.3457	1.8381	0.516945	5.37e-05	0.000365801	D-mannose binding lectin family protein, expressed	Os01g0642700				Q5VNX4	Q5VNX4_ORYSJ	unreviewed	Receptor-like serine/threonine-protein kinase (EC 2.7.11.1)	OsJ_02791 P0039G05.34 P0510C12.19	integral component of membrane [GO:0016021]; ATP binding [GO:0005524]; protein serine/threonine kinase activity [GO:0004674]; recognition of pollen [GO:0048544]			PF01453;PF00069;PF00954;
5356	LOC_Os06g42130	5.58859	1.83665	1.10395	0.00919582	0.0318353	leucoanthocyanidin dioxygenase, putative, expressed	Os06g0626700				Q67VR7	ANS2_ORYSJ	reviewed	Leucoanthocyanidin dioxygenase 2 (LDOX2) (Leucocyanidin oxygenase 2) (EC 1.14.20.4) (Anthocyanidin synthase 2) (OsANS2) (Leucoanthocyanidin hydroxylase 2)	ANS2 Os06g0626700 LOC_Os06g42130 OSJNBa0072A21.33 P0530H05.4	dioxygenase activity [GO:0051213]; L-ascorbic acid binding [GO:0031418]; leucocyanidin oxygenase activity [GO:0050589]; metal ion binding [GO:0046872]; anthocyanin-containing compound biosynthetic process [GO:0009718]		osa:4341576;	PF03171;PF14226;
6126	LOC_Os07g47590	302.913	1.83661	0.279149	6.84e-12	1.45e-10	expressed protein	Os07g0673200	OsRFPHC-13, OsNLA, NLA, OsNLA1, OsNLA1.1, OsNLA1.2, OsNLA1.3			Q7XI73	BAHL2_ORYSJ	reviewed	Probable E3 ubiquitin-protein ligase BAH1-like 2 (EC 2.3.2.27) (RING-type E3 ubiquitin transferase BAH1-like 2)	Os07g0673200 LOC_Os07g47590 OsJ_25542 P0470D12.139	nucleus [GO:0005634]; plasma membrane [GO:0005886]; metal ion binding [GO:0046872]; ubiquitin-protein transferase activity [GO:0004842]; defense response to bacterium [GO:0042742]; plant-type hypersensitive response [GO:0009626]; regulation of salicylic acid metabolic process [GO:0010337]; response to benzoic acid [GO:0080021]; response to nitrate [GO:0010167]; response to salicylic acid [GO:0009…		osa:4344254;
7582	LOC_Os10g39870	38.6028	1.83545	0.377303	1.7e-07	1.89e-06	ATG1, putative, expressed	Os10g0545800				Q9AV33	Q9AV33_ORYSJ	unreviewed	Cytochrome c biogenesis protein CcmE family, putative, expressed (Os10g0545800 protein) (cDNA clone:J033123A02, full insert sequence)	LOC_Os10g39870 Os10g0545800 OSNPB_100545800	integral component of membrane [GO:0016021]; mitochondrial inner membrane [GO:0005743]; plasma membrane [GO:0005886]; heme binding [GO:0020037]; cytochrome c-heme linkage [GO:0018063]		osa:4349284;	PF03100;
1186	LOC_Os01g71310	38.1574	1.83364	0.355415	3.87e-08	4.72e-07	cytokinin dehydrogenase precursor, putative, expressed	Os01g0940000	OsCKX4, ckx4, OsSCRM, OsSCRM2, SCRM, SCRM2			Q5JLP4	CKX4_ORYSJ	reviewed	Cytokinin dehydrogenase 4 (EC 1.5.99.12) (Cytokinin oxidase 4) (OsCKX4)	CKX4 Os01g0940000 LOC_Os01g71310 B1150F11.25	extracellular space [GO:0005615]; cytokinin dehydrogenase activity [GO:0019139]; FAD binding [GO:0071949]; cytokinin metabolic process [GO:0009690]	SUBCELLULAR LOCATION: Secreted, extracellular space {ECO:0000250}.	osa:4326515;	PF09265;PF01565;
355	LOC_Os01g19820	77.7454	1.83253	0.445363	5.1e-06	4.34e-05	universal stress protein domain containing protein, putative, expressed	Os01g0303800				Q657H4	Q657H4_ORYSJ	unreviewed	Os01g0303800 protein (cDNA clone:006-306-C04, full insert sequence)	Os01g0303800 OSNPB_010303800			osa:4323903;	PF00582;
492	LOC_Os01g37040	57.3889	1.83199	0.297806	1.22e-10	2.18e-09	retrotransposon protein, putative, Ty1-copia subclass, expressed	Os01g0551000				Q0JM09	Q0JM09_ORYSJ	unreviewed	Os01g0551000 protein	Os01g0551000 OSJNBa0024F24.32 OSJNBa0066C06.1			osa:4325843;
1183	LOC_Os01g71256	34.5266	1.82884	0.513897	5.12e-05	0.000350675	expressed protein	Os01g0939300				Q5JLP9	Q5JLP9_ORYSJ	unreviewed	Os01g0939300 protein (cDNA clone:J033024C23, full insert sequence)	Os01g0939300 OSNPB_010939300			osa:4326509;	PF16770;
7504	LOC_Os10g37290	86.4306	1.82762	0.329066	3.91e-09	5.58e-08	DEFL6 - Defensin and Defensin-like DEFL family, expressed	Os10g0516900				Q7XCS8	Q7XCS8_ORYSJ	unreviewed	Expressed protein (Os10g0516900 protein) (cDNA clone:002-121-E10, full insert sequence)	LOC_Os10g37290 Os10g0516900 OSNPB_100516900			osa:4349121;
8482	LOC_Os12g29690	34.1761	1.82571	0.420507	2.09e-06	1.92e-05	NBS-LRR disease resistance protein, putative, expressed	Os12g0481400				Q0INC3	Q0INC3_ORYSJ	unreviewed	Os12g0481400 protein	Os12g0481400	ADP binding [GO:0043531]			PF00931;PF18052;
4338	LOC_Os05g10690	219.271	1.82504	0.212899	1.64e-18	7.92e-17	Myb transcription factor, putative, expressed	Os05g0195700				A0A0P0WJ14	A0A0P0WJ14_ORYSJ	unreviewed	Os05g0195700 protein (Putative Myb-related transcription factor)	Os05g0195700 OsJ_17441 P0473H02.9	nucleus [GO:0005634]; DNA binding [GO:0003677]; zinc ion binding [GO:0008270]		osa:4338039;	PF00249;
419	LOC_Os01g27210	142.861	1.82495	0.347038	2e-08	2.54e-07	glutathione S-transferase, putative, expressed	Os01g0369700	OsGSTF5, OsGST F5			Q5ZC86	Q5ZC86_ORYSJ	unreviewed	Os01g0369700 protein (cDNA clone:001-121-F03, full insert sequence) (cDNA clone:002-188-H01, full insert sequence) (cDNA clone:J033039A11, full insert sequence)	Os01g0369700 OSNPB_010369700	cytoplasm [GO:0005737]; glutathione binding [GO:0043295]; glutathione transferase activity [GO:0004364]; glutathione metabolic process [GO:0006749]		osa:4325704;	PF00043;PF02798;
2918	LOC_Os03g42730	25.4508	1.82354	0.472062	1.62e-05	0.000123876	expressed protein	NA	NA			C7IZN0	C7IZN0_ORYSJ	unreviewed	Os03g0625500 protein	Os03g0625500				PF08387;
6483	LOC_Os08g32960	15.0517	1.82346	0.602552	0.000320986	0.00178401	endonuclease/exonuclease/phosphatase family domain containing protein, expressed	Os08g0425500				A3BTA3	A3BTA3_ORYSJ	unreviewed	Inositol polyphosphate-5-phosphatase-like (Os08g0425500 protein)	P0456B03.116 Os08g0425500 OsJ_27376	phosphatidylinositol-3,4,5-trisphosphate 5-phosphatase activity [GO:0034485]; phosphatidylinositol-4,5-bisphosphate 5-phosphatase activity [GO:0004439]; phosphatidylinositol dephosphorylation [GO:0046856]		osa:4345612;	PF03372;
7826	LOC_Os11g07130	25.3602	1.8223	0.488704	2.79e-05	0.000202526	receptor kinase, putative, expressed	Os11g0172350	OsRLCK312			Q2R9Y8	Q2R9Y8_ORYSJ	unreviewed	Uncharacterized protein	LOC_Os11g07130	ATP binding [GO:0005524]; protein serine/threonine kinase activity [GO:0004674]			PF00069;
3582	LOC_Os04g33150	44.5619	1.82202	0.398901	6.82e-07	6.85e-06	desiccation-related protein PCC13-62 precursor, putative, expressed	Os04g0404400	OsEnS-64, PCC13-62			Q7X6I8	Q7X6I8_ORYSJ	unreviewed	OJ000315_02.8 protein (OSJNBb0118P14.11 protein)	OJ000315_02.8 OsJ_14682 OSJNBb0118P14.11			osa:4335744;
7520	LOC_Os10g38110	21.1601	1.82026	0.502956	4.22e-05	0.000294441	cytochrome P450, putative, expressed	Os10g0525000	OsCYP704A5			Q109D2	Q109D2_ORYSJ	unreviewed	Cytochrome P450 family protein, expressed	LOC_Os10g38110	heme binding [GO:0020037]; iron ion binding [GO:0005506]; oxidoreductase activity, acting on paired donors, with incorporation or reduction of molecular oxygen [GO:0016705]			PF00067;
7521	LOC_Os10g38110	21.1601	1.82026	0.502956	4.22e-05	0.000294441	cytochrome P450, putative, expressed	Os10g0525000	OsCYP704A5			A0A0P0XWW2	A0A0P0XWW2_ORYSJ	unreviewed	Cytochrome P450-like protein (Os10g0525000 protein)	Os10g0525000 OsJ_32218 OSJNBb0005J14.27	integral component of membrane [GO:0016021]; heme binding [GO:0020037]; iron ion binding [GO:0005506]; oxidoreductase activity, acting on paired donors, with incorporation or reduction of molecular oxygen [GO:0016705]		osa:4349165;	PF00067;
7573	LOC_Os10g39710	85.0875	1.82014	0.307809	5.1e-10	8.35e-09	strictosidine synthase, putative, expressed	Os10g0543500	OsSTRL19, STRL19			Q7XCK3	Q7XCK3_ORYSJ	unreviewed	Strictosidine synthase family protein, expressed	LOC_Os10g39710	strictosidine synthase activity [GO:0016844]; biosynthetic process [GO:0009058]		osa:4349269;	PF03088;
7574	LOC_Os10g39710	85.0875	1.82014	0.307809	5.1e-10	8.35e-09	strictosidine synthase, putative, expressed	Os10g0543500	OsSTRL19, STRL19			Q109A9	Q109A9_ORYSJ	unreviewed	Strictosidine synthase family protein, expressed	LOC_Os10g39710	strictosidine synthase activity [GO:0016844]; biosynthetic process [GO:0009058]			PF03088;
7527	LOC_Os10g38340	122.469	1.82012	0.334319	7.21e-09	9.83e-08	glutathione S-transferase GSTU6, putative, expressed	Os10g0527400	OsGSTU19, GSTU6, OsGSTU6.1, GSTU6.1			B9G6Q1	B9G6Q1_ORYSJ	unreviewed	Os10g0527400 protein (Putative glutathione S-transferase)	Os10g0527400 OsJ_32225 OSJNBa0034L04.36 OSJNBb0005J14.19	cytoplasm [GO:0005737]; glutathione transferase activity [GO:0004364]; glutathione metabolic process [GO:0006749]		osa:4349181;	PF00043;PF02798;
7499	LOC_Os10g37160	3.5185	1.81884	3.13671	0.0138927	0.0449187	transposon protein, putative, unclassified, expressed	Os10g0515900				A0A0P0XWB1	A0A0P0XWB1_ORYSJ	unreviewed	Os10g0515900 protein (Putative cytochrome P450)	Os10g0515900 OsJ_32155 OSJNBa0026L12.2	integral component of membrane [GO:0016021]; membrane [GO:0016020]; heme binding [GO:0020037]; iron ion binding [GO:0005506]; oxidoreductase activity, acting on paired donors, with incorporation or reduction of molecular oxygen, NAD(P)H as one donor, and incorporation of one atom of oxygen [GO:0016709]		osa:4349113;	PF00067;
2121	LOC_Os02g54880	155.834	1.81846	0.308655	5.57e-10	9.04e-09	cytochrome c oxidase subunit, putative, expressed	Os02g0791400				Q6KAE3	Q6KAE3_ORYSJ	unreviewed	Cytochrome c oxidase subunit	Os02g0791400 OSNPB_020791400	mitochondrion [GO:0005739]		osa:4330974;	PF02297;
5897	LOC_Os07g35680	47.1283	1.81687	0.510377	4.77e-05	0.000329049	TKL_IRAK_DUF26-lc22 - DUF26 kinases have homology to DUF26 containing loci, expressed	Os07g0541200				Q84S63	Q84S63_ORYSJ	unreviewed	Putative serine/threonine kinase protein	P0458H05.129 OJ1008_E09.112	integral component of membrane [GO:0016021]; ATP binding [GO:0005524]; protein kinase activity [GO:0004672]		osa:4343499;	PF00069;PF01657;
8393	LOC_Os12g14120	11.0808	1.81381	0.701814	0.00125355	0.0058633	retrotransposon protein, putative, Ty1-copia subclass, expressed	NA	NA			Q2QV40	Q2QV40_ORYSJ	unreviewed	Retrotransposon protein, putative, Ty1-copia subclass	LOC_Os12g14120				PF07727;
6243	LOC_Os08g04560	100.371	1.8135	0.336565	1.03e-08	1.37e-07	decarboxylase, putative, expressed	Os08g0140500	OsTDC3			Q6YZ18	Q6YZ18_ORYSJ	unreviewed	Os08g0140500 protein	Os08g0140500 OSNPB_080140500	carboxy-lyase activity [GO:0016831]; pyridoxal phosphate binding [GO:0030170]; cellular amino acid metabolic process [GO:0006520]		osa:4344637;	PF00282;
2914	LOC_Os03g42130	168.442	1.81306	0.216923	1.04e-17	4.56e-16	gibberellin 20 oxidase 2, putative, expressed	Os03g0618300	2-ODD22, Os2-ODD22, Os2ODD22			Q6AV32	Q6AV32_ORYSJ	unreviewed	Os03g0618300 protein (Oxidoreductase, 2OG-Fe oxygenase family protein, expressed) (cDNA clone:J033026A10, full insert sequence)	LOC_Os03g42130 Os03g0618300 OSNPB_030618300	dioxygenase activity [GO:0051213]; metal ion binding [GO:0046872]		osa:4333459;	PF03171;PF14226;
5697	LOC_Os07g08810	115.248	1.81253	0.232702	1.1e-15	3.89e-14	expressed protein	Os07g0185700				Q6ZLF7	Q6ZLF7_ORYSJ	unreviewed	Os07g0185700 protein	Os07g0185700 OSNPB_070185700	centrosome [GO:0005813]; HAUS complex [GO:0070652]; mitotic spindle [GO:0072686]; centrosome cycle [GO:0007098]; spindle assembly [GO:0051225]		osa:4342590;	PF14932;
230	LOC_Os01g11600	23.9457	1.81253	0.460825	1.22e-05	9.61e-05	expressed protein	Os01g0214500				Q5QNJ2	Q5QNJ2_ORYSJ	unreviewed	Os01g0214500 protein (cDNA clone:001-103-G08, full insert sequence)	Os01g0214500 OSNPB_010214500	integral component of membrane [GO:0016021]		osa:4325256;
7437	LOC_Os10g34940	23.1642	1.81111	0.527461	7.98e-05	0.000515311	expressed protein	Os10g0491400				Q337I2	Q337I2_ORYSJ	unreviewed	Expressed protein	LOC_Os10g34940
88	LOC_Os01g04990	133.876	1.80995	0.25984	5.03e-13	1.23e-11	mitochondrial carrier protein, putative, expressed	Os01g0143100				Q0JQR9	Q0JQR9_ORYSJ	unreviewed	Os01g0143100 protein (Peroxidase Ca-dependent solute carrier) (cDNA clone:002-125-D01, full insert sequence) (cDNA clone:J013104N14, full insert sequence)	Os01g0143100 OSNPB_010143100	integral component of membrane [GO:0016021]; peroxidase activity [GO:0004601]; transmembrane transporter activity [GO:0022857]		osa:4325457;	PF00153;
1486	LOC_Os02g13870	24.3559	1.80983	0.602136	0.000320101	0.00177991	aquaporin protein, putative, expressed	Os02g0232900	OsNIP1;1, NIP1-1, rMIP1, MIP1, OsNIP1.1, NIP1.1			B7EFF6	B7EFF6_ORYSJ	unreviewed	NOD26-like intrinsic protein (cDNA clone:J013160F10, full insert sequence)	OsNIP1;1	integral component of membrane [GO:0016021]; channel activity [GO:0015267]		osa:4328814;	PF00230;
3925	LOC_Os04g49660	123.311	1.80845	0.234567	1.99e-15	6.8e-14	DUF581 domain containing protein, expressed	Os04g0586000				Q7XP52	Q7XP52_ORYSJ	unreviewed	Os04g0586000 protein	Os04g0586000 OSNPB_040586000			osa:4336795;	PF04570;
3393	LOC_Os04g02754	291.683	1.80742	0.176381	1.89e-25	1.84e-23	amidase family protein, putative, expressed	Os04g0117900	OsAMI2, AMI2, OsAMI1, AMI1			A0A0P0W696	A0A0P0W696_ORYSJ	unreviewed	Os04g0117800 protein	Os04g0117800 OsJ_13589			osa:4334956;	PF01425;
5129	LOC_Os06g14510	935.351	1.80634	0.181152	3.2e-24	2.75e-22	glucose-6-phosphate isomerase, putative, expressed	Os06g0256500	Pgi2(Pgib), Pgib, Pgi_2, Pgi2, GPI-B, PGI-B, PHI-B, Pgi-b, PGI-b			A0A0P0WUR5	A0A0P0WUR5_ORYSJ	unreviewed	Glucose-6-phosphate isomerase (EC 5.3.1.9) (Fragment)	Os06g0256500 OSNPB_060256500	glucose-6-phosphate isomerase activity [GO:0004347]; gluconeogenesis [GO:0006094]; glycolytic process [GO:0006096]			PF00342;
466	LOC_Os01g34480	869.916	1.79983	0.152034	3.95e-33	7.34e-31	NAD dependent epimerase/dehydratase family protein, putative, expressed	Os01g0528800	CADL			Q5QM39	Q5QM39_ORYSJ	unreviewed	Os01g0528800 protein (cDNA clone:001-025-F12, full insert sequence) (cDNA clone:J013162A03, full insert sequence)	Os01g0528800 OSNPB_010528800	coenzyme binding [GO:0050662]; oxidoreductase activity [GO:0016491]; oxidoreductase activity, acting on the CH-OH group of donors, NAD or NADP as acceptor [GO:0016616]		osa:4323945;	PF01370;
5024	LOC_Os06g08110	175.429	1.79946	0.226242	2.95e-16	1.12e-14	nodulin, putative, expressed	Os06g0179200				Q0DE41	Q0DE41_ORYSJ	unreviewed	Nodulin-like protein (Os06g0179200 protein)	Os06g0179200 OSJNBa0035I03.15	integral component of membrane [GO:0016021]; transmembrane transport [GO:0055085]		osa:4340300;	PF07690;PF06813;
2001	LOC_Os02g50450	10.9692	1.79941	0.684033	0.00112246	0.00531763	hypothetical protein	Os02g0738100				A0A0P0VPJ8	A0A0P0VPJ8_ORYSJ	unreviewed	Os02g0738100 protein	Os02g0738100
3520	LOC_Os04g26920	17.9524	1.79792	0.600205	0.000355483	0.00195079	oxidoreductase, aldo/keto reductase family protein, putative, expressed	Os04g0338100				Q7XT99	AKR2_ORYSJ	reviewed	Probable aldo-keto reductase 2 (EC 1.1.1.-)	Os04g0338000 LOC_Os04g26910 OsJ_14315 OSJNBa0008A08.11 OSJNBa0032I19.2	oxidoreductase activity [GO:0016491]		osa:4335512;	PF00248;
1165	LOC_Os01g70710	385.623	1.79747	0.1881	1.94e-22	1.39e-20	heavy metal-associated domain containing protein, expressed	Os01g0933200	OsHMP9, OsHMP09			Q5JMG8	Q5JMG8_ORYSJ	unreviewed	Os01g0933200 protein	Os01g0933200 OSNPB_010933200	metal ion binding [GO:0046872]; metal ion transport [GO:0030001]		osa:4326823;	PF00403;
3274	LOC_Os03g60540	9.98188	1.79413	0.787892	0.00262475	0.0111183	ZOS3-20 - C2H2 zinc finger protein, expressed	NA	NA			Q84TA4	Q84TA4_ORYSJ	unreviewed	Zinc finger, C2H2 type family protein	LOC_Os03g60540	nucleic acid binding [GO:0003676]
3930	LOC_Os04g49890	657.875	1.7868	0.204262	3.51e-19	1.82e-17	multidrug resistance-associated protein, putative, expressed	NA	NA			B9FC70	B9FC70_ORYSJ	unreviewed	Uncharacterized protein	OsJ_15949	integral component of membrane [GO:0016021]; ATP binding [GO:0005524]; ATPase activity [GO:0016887]; ATPase-coupled transmembrane transporter activity [GO:0042626]			PF00664;PF00005;
2427	LOC_Os03g10320	16.0429	1.78404	0.597089	0.000381824	0.0020766	expressed protein	Os03g0200200				A3AF58	A3AF58_ORYSJ	unreviewed	Uncharacterized protein	OsJ_09802				PF14009;
2428	LOC_Os03g10320	16.0429	1.78404	0.597089	0.000381824	0.0020766	expressed protein	Os03g0200200				Q10QE1	Q10QE1_ORYSJ	unreviewed	Expressed protein (Os03g0200200 protein)	LOC_Os03g10320 Os03g0200200 OSNPB_030200200			osa:4331964;	PF14009;
1156	LOC_Os01g70210	198.317	1.78016	0.244609	5.34e-14	1.49e-12	CRAL/TRIO domain containing protein, expressed	Os01g0926800				Q0JGE9	Q0JGE9_ORYSJ	unreviewed	Os01g0926800 protein (Sec14 like protein)	Os01g0926800 OSJNBa0093F16.23			osa:4326950;	PF00650;
4803	LOC_Os05g47810	6.83909	1.7795	0.934477	0.00622231	0.0229976	expressed protein	Os05g0551350				C7J246	C7J246_ORYSJ	unreviewed	Os05g0551350 protein	Os05g0551350			osa:9272595;	PF07797;
1202	LOC_Os01g72130	969.505	1.77872	0.181896	2.18e-23	1.72e-21	glutathione S-transferase, putative, expressed	Os01g0949750	OsGSTU35			Q8RZB3	Q8RZB3_ORYSJ	unreviewed	Os01g0949850 protein (Putative glutathione S-transferase)	Os01g0949850 B1147A04.21 OsJ_04763	transferase activity [GO:0016740]		osa:9269614;	PF00043;PF13417;
7529	LOC_Os10g38360	206.319	1.77865	0.239401	1.65e-14	4.96e-13	glutathione S-transferase, putative, expressed	Os10g0527800	OsGSTU12, OsGSTU6.2, GSTU6.2			Q0IW82	Q0IW82_ORYSJ	unreviewed	Os10g0527800 protein (Putative glutathione S-transferase)	Os10g0527800 OsJ_32227 OSJNBa0034L04.9 OSJNBb0005J14.1	cytoplasm [GO:0005737]; glutathione transferase activity [GO:0004364]; glutathione metabolic process [GO:0006749]			PF02798;
336	LOC_Os01g18660	127.268	1.7785	0.254603	4.51e-13	1.11e-11	aminotransferase, putative, expressed	Os01g0290600				Q5JNT6	LCYD2_ORYSJ	reviewed	Putative L-cysteine desulfhydrase 2 (EC 4.4.1.28) (OsL-CDes2) (L-CDes2)	Os01g0290600 LOC_Os01g18660 P0469E05.32 P0706B05.1	lyase activity [GO:0016829]		osa:4325157;	PF00266;
6154	LOC_Os07g48500	85.5381	1.77679	0.360738	1.23e-07	1.41e-06	stress responsive protein, putative, expressed	Os07g0684000				Q6Z4N4	40G3_ORYSJ	reviewed	Ricin B-like lectin R40G3 (Osr40g3)	R40G3 Os07g0684000 LOC_Os07g48500 OsJ_25617 OSJNBa0060O17.15	carbohydrate binding [GO:0030246]
6843	LOC_Os09g17810	8.11212	1.77584	0.817221	0.00360705	0.0145554	leucine zipper protein-like, putative, expressed	Os09g0347300	OsEXO70FX5, OsExo70FX5, OrysaFX5_Exo70			Q6ES92	Q6ES92_ORYSJ	unreviewed	Exocyst subunit Exo70 family protein	Os09g0347300 OSNPB_090347300	exocyst [GO:0000145]; exocytosis [GO:0006887]; protein transport [GO:0015031]		osa:4346808;	PF03081;
6260	LOC_Os08g05960	74.7511	1.77359	0.323377	6.19e-09	8.54e-08	expressed protein	Os08g0155900	OsDR10			Q6ZDA6	Q6ZDA6_ORYSJ	unreviewed	Os08g0155900 protein	Os08g0155900 OSNPB_080155900
7922	LOC_Os11g16310	9.37161	1.77244	0.727237	0.00194453	0.00860554	expressed protein	Os11g0264500				Q53LT8	Q53LT8_ORYSJ	unreviewed	Uncharacterized protein	LOC_Os11g16310	integral component of membrane [GO:0016021]		osa:4350239;
44	LOC_Os01g02600	5.22519	1.7724	1.05438	0.00985954	0.0337481	Ser/Thr receptor-like kinase, putative, expressed	Os01g0115900				B9EZ70	B9EZ70_ORYSJ	unreviewed	Protein kinase domain-containing protein	OsJ_00133	ATP binding [GO:0005524]; protein kinase activity [GO:0004672]		osa:4326089;	PF00069;
7006	LOC_Os09g30300	34.2623	1.77133	0.383441	6.1e-07	6.18e-06	expressed protein	Os09g0480600				A0A0P0XP07	A0A0P0XP07_ORYSJ	unreviewed	Os09g0480600 protein	Os09g0480600	integral component of membrane [GO:0016021]		osa:4347390;
4515	LOC_Os05g32860	18.533	1.77089	0.513045	8.16e-05	0.000525288	expressed protein	Os05g0395400				A0A0N7KKQ6	A0A0N7KKQ6_ORYSJ	unreviewed	Os05g0395400 protein	Os05g0395400
4707	LOC_Os05g42220	39.9544	1.76726	0.388302	8.32e-07	8.18e-06	leucine rich repeat domain containing protein, putative, expressed	Os05g0501600				Q60EJ1	Q60EJ1_ORYSJ	unreviewed	Os05g0501600 protein	Os05g0501600 OSNPB_050501600	cytoplasm [GO:0005737]; protein kinase binding [GO:0019901]		osa:4339238;	PF13855;
6410	LOC_Os08g25380	128.282	1.76724	0.25283	4.56e-13	1.12e-11	serine/threonine-protein kinase BRI1-like 1 precursor, putative, expressed	Os08g0342300	OsBRL3			Q6ZCZ2	BRL3_ORYSJ	reviewed	Brassinosteroid LRR receptor kinase BRL3 (EC 2.7.11.1) (BRI1-like receptor kinase 3)	BRL3 Os08g0342300 LOC_Os08g25380 OJ1790_D02.27 OsJ_26971	integral component of membrane [GO:0016021]; plasma membrane [GO:0005886]; ATP binding [GO:0005524]; protein serine/threonine kinase activity [GO:0004674]; brassinosteroid mediated signaling pathway [GO:0009742]; hormone-mediated signaling pathway [GO:0009755]	SUBCELLULAR LOCATION: Cell membrane {ECO:0000305}; Single-pass type I membrane protein {ECO:0000305}.	osa:9272003;	PF00560;PF13516;PF13855;PF08263;PF00069;
8613	LOC_Os12g40300	57.9037	1.76569	0.317875	4.67e-09	6.55e-08	SKP1, putative, expressed	Os12g0594600				Q0IM67	Q0IM67_ORYSJ	unreviewed	Os12g0594600 protein	Os12g0594600 OsJ_36723	cytoplasm [GO:0005737]; nucleus [GO:0005634]; cullin family protein binding [GO:0097602]; protein ubiquitination [GO:0016567]; SCF-dependent proteasomal ubiquitin-dependent protein catabolic process [GO:0031146]		osa:4352688;	PF01466;
702	LOC_Os01g50170	15.5176	1.76538	0.790024	0.00271375	0.0114475	eukaryotic aspartyl protease domain containing protein, expressed	Os01g0696800				A2ZWV5	A2ZWV5_ORYSJ	unreviewed	Os01g0696800 protein	Os01g0696800 OSNPB_010696800	extracellular region [GO:0005576]; aspartic-type endopeptidase activity [GO:0004190]; protein catabolic process [GO:0030163]; proteolysis [GO:0006508]		osa:4325291;	PF14541;PF14543;
3328	LOC_Os03g62480	20.5339	1.76247	0.613199	0.000508169	0.00267003	anthocyanidin 5,3-O-glucosyltransferase, putative, expressed	Os03g0841600				Q10AU0	Q10AU0_ORYSJ	unreviewed	Putative UDP-glycosyltransferase	OSJNBa0075M12.17	transferase activity, transferring hexosyl groups [GO:0016758]		osa:4334736;	PF00201;
7999	LOC_Os11g29720	28.7415	1.76177	0.420136	4.27e-06	3.7e-05	cytochrome P450, putative, expressed	Os11g0489250				Q2R447	Q2R447_ORYSJ	unreviewed	Cytochrome P450 family protein, expressed (Os11g0489250 protein)	LOC_Os11g29720 Os11g0489250 OSNPB_110489250	integral component of membrane [GO:0016021]; membrane [GO:0016020]; heme binding [GO:0020037]; iron ion binding [GO:0005506]; oxidoreductase activity, acting on paired donors, with incorporation or reduction of molecular oxygen, NAD(P)H as one donor, and incorporation of one atom of oxygen [GO:0016709]		osa:4350534;	PF00067;
7420	LOC_Os10g33270	400.378	1.76067	0.204654	1.22e-18	6.01e-17	cyanate hydratase, putative, expressed	Os10g0471300	OsCYN			Q9FWK4	CYNS_ORYSJ	reviewed	Cyanate hydratase (Cyanase) (EC 4.2.1.104) (Cyanate hydrolase) (Cyanate lyase)	CYN Os10g0471300 LOC_Os10g33270 OsJ_31860 OSJNBa0079L16.19	cyanate hydratase activity [GO:0008824]; DNA binding [GO:0003677]; cyanate metabolic process [GO:0009439]		osa:4348870;	PF02560;
7623	LOC_Os10g40990	15.6963	1.75863	0.577841	0.000331927	0.00183643	flavonol synthase/flavanone 3-hydroxylase, putative, expressed	Os10g0559200				Q0IVR0	Q0IVR0_ORYSJ	unreviewed	Os10g0559200 protein	Os10g0559200	dioxygenase activity [GO:0051213]			PF14226;
7436	LOC_Os10g34930	117.048	1.75731	0.312303	2.76e-09	4.04e-08	secretory protein, putative, expressed	Os10g0491000				A3C602	A3C602_ORYSJ	unreviewed	Os10g0491000 protein (Putative basic secretory protein)	Os10g0491000 OsJ_31987 OSJNBa0051D19.25			osa:4348974;	PF04450;
462	LOC_Os01g33869	397.144	1.75701	0.23075	4.39e-15	1.43e-13	expressed protein	Os01g0522100				A0A0P0V3F3	A0A0P0V3F3_ORYSJ	unreviewed	Os01g0522400 protein	Os01g0522400 OSNPB_010522400	integral component of membrane [GO:0016021]
463	LOC_Os01g33869	397.144	1.75701	0.23075	4.39e-15	1.43e-13	expressed protein	Os01g0522400				A0A0P0V3F3	A0A0P0V3F3_ORYSJ	unreviewed	Os01g0522400 protein	Os01g0522400 OSNPB_010522400	integral component of membrane [GO:0016021]
6908	LOC_Os09g25190	10.7457	1.75477	0.715951	0.00187453	0.00833365	protein binding protein, putative, expressed	Os09g0419500	qSSR9-1			Q69Q97	Q69Q97_ORYSJ	unreviewed	Putative ubiquitin conjugating enzyme 7 interacting protein 4	P0668D04.10-1 P0701F11.29-1	cytoplasm [GO:0005737]; ubiquitin ligase complex [GO:0000151]; metal ion binding [GO:0046872]; ubiquitin conjugating enzyme binding [GO:0031624]; ubiquitin protein ligase activity [GO:0061630]; positive regulation of proteasomal ubiquitin-dependent protein catabolic process [GO:0032436]; protein polyubiquitination [GO:0000209]; ubiquitin-dependent protein catabolic process [GO:0006511]		osa:4347076;	PF01485;PF00097;
3978	LOC_Os04g51800	13.48	1.75348	0.61275	0.00059539	0.00306671	MYB protein, putative, expressed	Os04g0607200				Q7FAK9	Q7FAK9_ORYSJ	unreviewed	OSJNBa0060N03.1 protein	OSJNBa0060N03.1	DNA binding [GO:0003677]
181	LOC_Os01g09420	12.3152	1.75327	0.680109	0.00130875	0.00608874	expressed protein	Os01g0189800				Q5SNI5	Q5SNI5_ORYSJ	unreviewed	Os01g0189800 protein	Os01g0189800 OSNPB_010189800			osa:4326773;	PF07762;
5885	LOC_Os07g34980	11.3522	1.75299	0.663047	0.00113201	0.00535768	TKL_IRAK_DUF26-lh.9 - DUF26 kinases have homology to DUF26 containing loci, expressed	Os07g0534500	OsRLCK233			B9FXN0	B9FXN0_ORYSJ	unreviewed	Uncharacterized protein	OsJ_24562	ATP binding [GO:0005524]; protein kinase activity [GO:0004672]			PF07714;PF01657;
7771	LOC_Os11g05050	671.024	1.75239	0.179198	2.34e-23	1.85e-21	stem-specific protein TSJT1, putative, expressed	Os11g0147800				Q0IUM6	Q0IUM6_ORYSJ	unreviewed	Os11g0147800 protein	Os11g0147800 OsJ_32962			osa:4349769;	PF12481;
3959	LOC_Os04g51090	22.5317	1.75206	0.524686	0.000123605	0.000759712	tRNA-splicing endonuclease positive effector-related, putative, expressed	Os04g0599650				Q7XPT5	Q7XPT5_ORYSJ	unreviewed	OSJNBa0083N12.5 protein	OSJNBa0083N12.5	ATP binding [GO:0005524]			PF13086;PF13087;
6708	LOC_Os08g44360	888.208	1.75158	0.18255	1.35e-22	9.86e-21	male sterility protein 2, putative, expressed	Os08g0557800				Q6ZJ06	Q6ZJ06_ORYSJ	unreviewed	Fatty acyl-CoA reductase (EC 1.2.1.84)	Os08g0557800 OSNPB_080557800	intracellular membrane-bounded organelle [GO:0043231]; alcohol-forming fatty acyl-CoA reductase activity [GO:0102965]; fatty-acyl-CoA reductase (alcohol-forming) activity [GO:0080019]; lipid metabolic process [GO:0006629]; long-chain fatty-acyl-CoA metabolic process [GO:0035336]; suberin biosynthetic process [GO:0010345]		osa:4346301;	PF07993;PF03015;
8176	LOC_Os11g47520	4.9651	1.75137	1.24254	0.0134845	0.0438554	glycosyl hydrolase, putative, expressed	Os11g0701100	riceXIP			Q53NL5	XIP2_ORYSJ	reviewed	Xylanase inhibitor protein 2 (Class III chitinase homolog h)	Chib3H-h Os11g0701100 LOC_Os11g47520	extracellular region [GO:0005576]; chitinase activity [GO:0004568]; enzyme inhibitor activity [GO:0004857]; carbohydrate metabolic process [GO:0005975]; defense response to fungus [GO:0050832]	SUBCELLULAR LOCATION: Secreted {ECO:0000305}.	osa:4351187;	PF00704;
5881	LOC_Os07g34850	122.846	1.75119	0.346215	6.2e-08	7.34e-07	aspartic proteinase nepenthesin, putative, expressed	Os07g0532800				Q69IP7	Q69IP7_ORYSJ	unreviewed	Os07g0532800 protein	Os07g0532800 OSNPB_070532800	extracellular region [GO:0005576]; aspartic-type endopeptidase activity [GO:0004190]; protein catabolic process [GO:0030163]; proteolysis [GO:0006508]		osa:4343460;	PF14541;PF14543;
1679	LOC_Os02g33670	14.6272	1.74524	0.637483	0.00081591	0.00402283	expressed protein	Os02g0540400				C7IYA3	C7IYA3_ORYSJ	unreviewed	Os02g0540400 protein (Fragment)	Os02g0540400	integral component of membrane [GO:0016021]
3057	LOC_Os03g51110	43.842	1.74454	0.335665	3.4e-08	4.18e-07	MYB family transcription factor, putative, expressed	Os03g0720800	OsMYB52, OsMYB52/54			Q8LLP3	Q8LLP3_ORYSJ	unreviewed	Myb-like DNA-binding domain containing protein, expressed (Os03g0720800 protein) (Putative Myb/Myb-related protein) (cDNA clone:J013060F16, full insert sequence)	OSJNBa0031O09.05 LOC_Os03g51110 Os03g0720800 OSNPB_030720800	nucleus [GO:0005634]; DNA binding [GO:0003677]	SUBCELLULAR LOCATION: Nucleus {ECO:0000256|SAAS:SAAS01171689}.	osa:4333934;	PF00249;
3669	LOC_Os04g38540	7.89864	1.74453	0.976591	0.00746567	0.0268189	aldose 1-epimerase, putative, expressed	Os04g0458600				A3AUH5	A3AUH5_ORYSJ	unreviewed	Aldose 1-epimerase (EC 5.1.3.3) (Galactose mutarotase)	OsJ_15042	aldose 1-epimerase activity [GO:0004034]; carbohydrate binding [GO:0030246]; hexose metabolic process [GO:0019318]			PF01263;
3670	LOC_Os04g38540	7.89864	1.74453	0.976591	0.00746567	0.0268189	aldose 1-epimerase, putative, expressed	Os04g0458600				A0A0P0WBB6	A0A0P0WBB6_ORYSJ	unreviewed	Aldose 1-epimerase (EC 5.1.3.3) (Galactose mutarotase)	Os04g0458600 OSNPB_040458600	aldose 1-epimerase activity [GO:0004034]; carbohydrate binding [GO:0030246]; galactose catabolic process via UDP-galactose [GO:0033499]; glucose metabolic process [GO:0006006]			PF01263;
3601	LOC_Os04g33920	9.7384	1.74409	0.774521	0.00291492	0.0121527	LTPL102 - Protease inhibitor/seed storage/LTP family protein precursor, expressed	Os04g0415800	OsLTPd6, OsLtpV.2			Q7XTF6	Q7XTF6_ORYSJ	unreviewed	OJ991214_12.11 protein (Os04g0415800 protein)	OJ991214_12.11 Os04g0415800 OsJ_14756	fatty acid binding [GO:0005504]; systemic acquired resistance [GO:0009627]		osa:4335805;	PF14368;
4069	LOC_Os04g55720	1323.02	1.74371	0.123811	8.23e-46	3.4e-43	D-3-phosphoglycerate dehydrogenase, chloroplast precursor, putative, expressed	Os04g0650800				A0A0P0WFN9	A0A0P0WFN9_ORYSJ	unreviewed	OSJNBb0059K02.15 protein (Os04g0650800 protein)	Os04g0650800 OSJNBb0059K02.15	chloroplast stroma [GO:0009570]; NAD binding [GO:0051287]; phosphoglycerate dehydrogenase activity [GO:0004617]; cellular amino acid metabolic process [GO:0006520]; L-serine biosynthetic process [GO:0006564]		osa:4337230;	PF00389;PF02826;PF01842;
5001	LOC_Os06g06720	104.916	1.74339	0.265488	8.49e-12	1.78e-10	flavonol synthase/flavanone 3-hydroxylase, putative, expressed	Os06g0162500	2-ODD10, Os2-ODD10, Os2ODD10			A3B8N0	A3B8N0_ORYSJ	unreviewed	Os06g0162500 protein (Putative anthocyanidin synthase)	Os06g0162500 OsJ_20223 P0681F10.36	peroxisome [GO:0005777]; dioxygenase activity [GO:0051213]; metal ion binding [GO:0046872]			PF03171;PF14226;
6195	LOC_Os08g01780	49.7462	1.74201	0.389384	1.23e-06	1.18e-05	OsIAA25 - Auxin-responsive Aux/IAA gene family member, expressed	Os08g0109400	OsIAA25			P0C128	IAA25_ORYSJ	reviewed	Auxin-responsive protein IAA25 (Indoleacetic acid-induced protein 25)	IAA25 Os08g0109400 LOC_Os08g01780 OsJ_21291	nucleus [GO:0005634]; auxin-activated signaling pathway [GO:0009734]; regulation of transcription, DNA-templated [GO:0006355]	SUBCELLULAR LOCATION: Nucleus {ECO:0000250}.	osa:4344471;	PF02309;
8342	LOC_Os12g08760	269.158	1.73999	0.389931	1.19e-06	1.15e-05	carboxyvinyl-carboxyphosphonate phosphorylmutase, putative, expressed	Os12g0189300				Q2QWN6	Q2QWN6_ORYSJ	unreviewed	Carboxyvinyl-carboxyphosphonate phosphorylmutase, putative, expressed	LOC_Os12g08760	catalytic activity [GO:0003824]		osa:4351693;
5226	LOC_Os06g29950	18.7398	1.73943	0.522631	0.000132645	0.000810765	MATE domain containing protein, expressed	Os06g0495100				Q0DC20	Q0DC20_ORYSJ	unreviewed	Protein DETOXIFICATION (Multidrug and toxic compound extrusion protein)	Os06g0495100	integral component of membrane [GO:0016021]; antiporter activity [GO:0015297]; xenobiotic transmembrane transporter activity [GO:0042910]			PF01554;
831	LOC_Os01g56080	9.92453	1.73933	0.703924	0.00182298	0.00814872	expressed protein	Os01g0766300				Q5ZAN5	Q5ZAN5_ORYSJ	unreviewed	Os01g0766300 protein	Os01g0766300 OSNPB_010766300			osa:4325493;
8576	LOC_Os12g38040	435.169	1.73832	0.851816	0.00398869	0.015881	metallothionein family protein, expressed	Os12g0568100				Q2QNE9	Q2QNE9_ORYSJ	unreviewed	Zinc knuckle family protein, expressed	LOC_Os12g38040	nucleic acid binding [GO:0003676]; zinc ion binding [GO:0008270]			PF01439;
2910	LOC_Os03g41480	1.96333	1.73831	5.59006	0.0116707	0.0388338	expressed protein	NA	NA			Q10GW7	Q10GW7_ORYSJ	unreviewed	Uncharacterized protein	LOC_Os03g41480
6350	LOC_Os08g14600	11.5056	1.73349	0.681776	0.00146448	0.00672199	expressed protein	NA	NA			Q6Z0U1	Q6Z0U1_ORYSJ	unreviewed	Os08g0243800 protein	Os08g0243800 OSNPB_080243800
7342	LOC_Os10g26060	6.67253	1.73245	0.920014	0.00677934	0.0247258	glutelin, putative, expressed	Os10g0400200	Glua2*, Glua2, GLUA-2, GluA-2, Glu20, GluA2, OsEnS-137			A3C4I1	A3C4I1_ORYSJ	unreviewed	Uncharacterized protein	OsJ_31438	nutrient reservoir activity [GO:0045735]		osa:4348563;	PF00190;
7277	LOC_Os10g20120	11.9599	1.73222	0.818143	0.00395115	0.0157418	serine/threonine-protein kinase receptor precursor, putative, expressed	NA	NA			Q8LMB2	Q8LMB2_ORYSJ	unreviewed	Receptor-like serine/threonine-protein kinase (EC 2.7.11.1)	LOC_Os10g20120	integral component of membrane [GO:0016021]; ATP binding [GO:0005524]; carbohydrate binding [GO:0030246]; protein serine/threonine kinase activity [GO:0004674]; recognition of pollen [GO:0048544]		osa:107279077;	PF01453;PF08276;PF00069;PF00954;
4890	LOC_Os05g51690	400.601	1.73198	0.171653	1.04e-24	9.32e-23	CCT motif family protein, expressed	Os05g0595300	OsNRR, NRR, NRRa, NRRb, OsCCT18, OsCMF6, CCT18, CMF6, CRCT, Os CRCT			Q5TKF5	Q5TKF5_ORYSJ	unreviewed	Os05g0595300 protein (cDNA clone:001-030-F12, full insert sequence)	Os05g0595300 OSNPB_050595300
4891	LOC_Os05g51690	400.601	1.73198	0.171653	1.04e-24	9.32e-23	CCT motif family protein, expressed	Os05g0595300	OsNRR, NRR, NRRa, NRRb, OsCCT18, OsCMF6, CCT18, CMF6, CRCT, Os CRCT			Q0DFE5	Q0DFE5_ORYSJ	unreviewed	Os05g0595300 protein	Os05g0595300 OSNPB_050595300	nucleus [GO:0005634]	SUBCELLULAR LOCATION: Nucleus {ECO:0000256|PROSITE-ProRule:PRU00357}.	osa:4339814;	PF06203;
7257	LOC_Os10g14920	1136.07	1.73129	0.184828	1.26e-21	8.19e-20	integral membrane protein DUF6 containing protein, expressed	Os10g0210500	OsUMAMIT15			Q33A71	Q33A71_ORYSJ	unreviewed	WAT1-related protein	LOC_Os10g14920	integral component of membrane [GO:0016021]; transmembrane transporter activity [GO:0022857]	SUBCELLULAR LOCATION: Membrane {ECO:0000256|RuleBase:RU363077}; Multi-pass membrane protein {ECO:0000256|RuleBase:RU363077}.		PF00892;
7258	LOC_Os10g14920	1136.07	1.73129	0.184828	1.26e-21	8.19e-20	integral membrane protein DUF6 containing protein, expressed	Os10g0210500	OsUMAMIT15			Q8S6X8	Q8S6X8_ORYSJ	unreviewed	WAT1-related protein	OSJNBa0082N11.14	integral component of membrane [GO:0016021]; transmembrane transporter activity [GO:0022857]	SUBCELLULAR LOCATION: Membrane {ECO:0000256|RuleBase:RU363077}; Multi-pass membrane protein {ECO:0000256|RuleBase:RU363077}.		PF00892;
7259	LOC_Os10g14920	1136.07	1.73129	0.184828	1.26e-21	8.19e-20	integral membrane protein DUF6 containing protein, expressed	Os10g0210500	OsUMAMIT15			Q33A72	Q33A72_ORYSJ	unreviewed	WAT1-related protein	LOC_Os10g14920 Os10g0210500 OSNPB_100210500	integral component of membrane [GO:0016021]; plasma membrane [GO:0005886]; transmembrane transporter activity [GO:0022857]	SUBCELLULAR LOCATION: Membrane {ECO:0000256|RuleBase:RU363077}; Multi-pass membrane protein {ECO:0000256|RuleBase:RU363077}.	osa:4348283;	PF00892;
6385	LOC_Os08g19694	170.562	1.73031	0.232766	1.8e-14	5.37e-13	NB-ARC domain containing protein, expressed	Os08g0293300				Q84YX3	Q84YX3_ORYSJ	unreviewed	Os08g0293300 protein	Os08g0293300 OSNPB_080293300	ADP binding [GO:0043531]		osa:4345194;	PF00931;PF18052;
5670	LOC_Os07g07820	14.072	1.72982	0.613869	0.000685397	0.00346285	expressed protein	Os07g0174700				Q8H577	Q8H577_ORYSJ	unreviewed	Os07g0174700 protein	Os07g0174700 OSNPB_070174700
7927	LOC_Os11g17014	49.5489	1.7265	0.453635	2.14e-05	0.00015952	NB-ARC domain containing protein, expressed	Os11g0270500				A0A0P0Y143	A0A0P0Y143_ORYSJ	unreviewed	Os11g0270500 protein	Os11g0270500	ADP binding [GO:0043531]		osa:4350261;	PF00931;PF18052;
6319	LOC_Os08g10320	276.591	1.72507	0.227586	5.88e-15	1.87e-13	SHR5-receptor-like kinase, putative, expressed	Os08g0203600				Q6ZKW7	Q6ZKW7_ORYSJ	unreviewed	Os08g0203400 protein (cDNA clone:J013162L02, full insert sequence)	Os08g0203400 OSNPB_080203400	integral component of membrane [GO:0016021]; plasma membrane [GO:0005886]; ATP binding [GO:0005524]; protein serine/threonine kinase activity [GO:0004674]; protein autophosphorylation [GO:0046777]		osa:4344914;	PF11721;PF07714;
5641	LOC_Os07g05680	8.04017	1.72454	0.847148	0.00499172	0.0191656	expressed protein	NA	NA			Q7XIY5	Q7XIY5_ORYSJ	unreviewed	Os07g0151600 protein	Os07g0151600 OSNPB_070151600	integral component of membrane [GO:0016021]
8616	LOC_Os12g40390	4.71928	1.72452	1.26971	0.0154361	0.0489334	expressed protein	Os12g0595600				Q2QMQ4	Q2QMQ4_ORYSJ	unreviewed	Skp1 domain-containing protein	LOC_Os12g40390	ubiquitin-dependent protein catabolic process [GO:0006511]			PF01466;
8490	LOC_Os12g30620	10.5729	1.72227	0.682939	0.00160389	0.00728352	tetratricopeptide-like helical, putative, expressed	Os12g0490100				C7J9P2	C7J9P2_ORYSJ	unreviewed	Os12g0490100 protein	Os12g0490100 OSNPB_120490100	intracellular membrane-bounded organelle [GO:0043231]; RNA modification [GO:0009451]			PF01535;PF13041;
6582	LOC_Os08g38880	401.534	1.72105	0.246583	4.78e-13	1.17e-11	WD-40 repeat family protein, putative, expressed	Os08g0497600	SRWD1, OsWD40-162			Q7F8T9	Q7F8T9_ORYSJ	unreviewed	Os08g0497600 protein (cDNA clone:001-040-C09, full insert sequence)	Os08g0497600 OSNPB_080497600				PF00400;
2703	LOC_Os03g21060	30.0508	1.71624	0.455849	2.52e-05	0.000184845	No apical meristem protein, putative, expressed	Os03g0327800	OsNAP, NAP, ONAC058, ONAC58, Os PS1, PS1, OsCTb1, CTb1			Q8H7M1	Q8H7M1_ORYSJ	unreviewed	NAC domain transcription factor, putative, expressed (NAC transcription factor 58) (Os03g0327800 protein) (cDNA, clone: J100075D15, full insert sequence)	NAC58 LOC_Os03g21060 Os03g0327800 OSNPB_030327800	nucleus [GO:0005634]; DNA binding [GO:0003677]; regulation of transcription, DNA-templated [GO:0006355]	SUBCELLULAR LOCATION: Nucleus {ECO:0000256|SAAS:SAAS01215438}.	osa:4332717;	PF02365;
3110	LOC_Os03g53520	112.126	1.71392	0.269432	3.46e-11	6.7e-10	expressed protein	Os03g0746700				A0A0P0W303	A0A0P0W303_ORYSJ	unreviewed	Os03g0746700 protein	OJ1124_H03.7 Os03g0746700			osa:4334091;
5114	LOC_Os06g13810	2169.87	1.71251	0.240144	1.61e-13	4.17e-12	pyrophosphate--fructose 6-phosphate 1-phosphotransferase subunit beta, putative, expressed	Os06g0247500	OsPFPB, OsPFP-B, PFP-B, PFPbeta			Q654U8	Q654U8_ORYSJ	unreviewed	Pyrophosphate--fructose 6-phosphate 1-phosphotransferase subunit beta (PFP) (EC 2.7.1.90) (6-phosphofructokinase, pyrophosphate dependent) (PPi-PFK) (Pyrophosphate-dependent 6-phosphofructose-1-kinase)	PFP-BETA Os06g0247500 OSNPB_060247500	cytosol [GO:0005829]; 6-phosphofructokinase activity [GO:0003872]; ATP binding [GO:0005524]; diphosphate-fructose-6-phosphate 1-phosphotransferase activity [GO:0047334]; metal ion binding [GO:0046872]; phosphofructokinase activity [GO:0008443]; fructose 6-phosphate metabolic process [GO:0006002]; photosynthesis [GO:0015979]; response to glucose [GO:0009749]	SUBCELLULAR LOCATION: Cytoplasm {ECO:0000256|HAMAP-Rule:MF_03185}.	osa:4340643;	PF00365;
8672	LOC_Os12g42860	431.617	1.71225	0.261607	9.83e-12	2.05e-10	2-aminoethanethiol dioxygenase, putative, expressed	Os12g0623600				Q0ILT6	Q0ILT6_ORYSJ	unreviewed	Os12g0623600 protein	Os12g0623600 OsJ_36924	oxidoreductase activity, acting on single donors with incorporation of molecular oxygen, incorporation of two atoms of oxygen [GO:0016702]		osa:4352829;	PF07847;
6846	LOC_Os09g17870	46.255	1.7117	0.351961	1.91e-07	2.1e-06	cytidylyltransferase domain containing protein, expressed	Os09g0347900				A0A0P0XLS3	A0A0P0XLS3_ORYSJ	unreviewed	Os09g0347900 protein (Fragment)	Os09g0347900 OSNPB_090347900	nicotinamide-nucleotide adenylyltransferase activity [GO:0000309]; nicotinate-nucleotide adenylyltransferase activity [GO:0004515]; NAD biosynthetic process [GO:0009435]			PF01467;
6847	LOC_Os09g17870	46.255	1.7117	0.351961	1.91e-07	2.1e-06	cytidylyltransferase domain containing protein, expressed	Os09g0347900				Q0DWH7	NMNAT_ORYSJ	reviewed	Nicotinamide/nicotinic acid mononucleotide adenylyltransferase (NMN/NaMN adenylyltransferase) (EC 2.7.7.1) (EC 2.7.7.18) (Nicotinamide mononucleotide adenylyltransferase) (NMN adenylyltransferase) (Nicotinate-nucleotide adenylyltransferase) (NaMN adenylyltransferase)	Os02g0814900 LOC_Os02g56980 OJ1293_E04.25 OsJ_08854	ATP binding [GO:0005524]; metal ion binding [GO:0046872]; nicotinamide-nucleotide adenylyltransferase activity [GO:0000309]; nicotinate-nucleotide adenylyltransferase activity [GO:0004515]; NAD biosynthetic process [GO:0009435]		osa:4331124;	PF01467;
2238	LOC_Os03g02300	23.9824	1.70877	0.50103	9.44e-05	0.000599447	expressed protein	Os03g0114100				Q8GZX3	Q8GZX3_ORYSJ	unreviewed	Expressed protein	LOC_Os03g02300	integral component of membrane [GO:0016021]
6480	LOC_Os08g32890	34.4712	1.70871	0.368564	5.97e-07	6.07e-06	disease resistance protein RPM1, putative, expressed	NA	NA			Q7EZU4	Q7EZU4_ORYSJ	unreviewed	Putative disease resistance gene homolog	P0456B03.104 OSJNBa0056L09.33	ADP binding [GO:0043531]			PF00931;
1307	LOC_Os02g03710	120.53	1.70822	0.221815	2.39e-15	8.07e-14	UP-9A, putative, expressed	Os02g0129800				Q6Z6Y4	Q6Z6Y4_ORYSJ	unreviewed	Os02g0129800 protein (cDNA clone:002-156-D07, full insert sequence)	Os02g0129800 OSNPB_020129800	cellular oxidant detoxification [GO:0098869]		osa:4328185;
7382	LOC_Os10g30410	11.2969	1.70782	0.680856	0.00165624	0.00748912	cytochrome P450 71D7, putative, expressed	Os10g0439924	Oscyp71Z8			Q7XE28	Q7XE28_ORYSJ	unreviewed	Cytochrome P450 family protein, expressed (Os10g0439924 protein) (cDNA clone:J013112H19, full insert sequence)	LOC_Os10g30410 Os10g0439924 OSNPB_100439924	membrane [GO:0016020]; heme binding [GO:0020037]; iron ion binding [GO:0005506]; oxidoreductase activity, acting on paired donors, with incorporation or reduction of molecular oxygen, NAD(P)H as one donor, and incorporation of one atom of oxygen [GO:0016709]			PF00067;
1748	LOC_Os02g37800	36.3119	1.7073	0.456056	2.64e-05	0.000192768	lecithin:cholesterol acyltransferase, putative, expressed	Os02g0590400				A0A0P0VL40	A0A0P0VL40_ORYSJ	unreviewed	Os02g0590400 protein (Putative acyltransferase (46.9 kD) (1H765))	Os02g0590400 OSJNBa0006O15.23	O-acyltransferase activity [GO:0008374]; lipid metabolic process [GO:0006629]		osa:4329826;	PF02450;
3457	LOC_Os04g11390	278.225	1.70707	0.220934	1.94e-15	6.68e-14	expressed protein	Os04g0191400				A0A0N7KIM3	A0A0N7KIM3_ORYSJ	unreviewed	OSJNBa0059D20.11 protein (Os04g0191400 protein)	Os04g0191400 OsJ_13931 OSJNBa0059D20.11
3416	LOC_Os04g04360	4.45442	1.70677	1.1927	0.0151022	0.0480877	expressed protein	NA	NA			Q7XS09	Q7XS09_ORYSJ	unreviewed	OSJNBa0095H06.9 protein	OSJNBa0095H06.9
580	LOC_Os01g43720	281.189	1.70667	0.238916	1.49e-13	3.88e-12	cytochrome P450 72A1, putative, expressed	Os01g0627600	OsCYP72A19			A0A0P0V5G6	A0A0P0V5G6_ORYSJ	unreviewed	Os01g0627600 protein (Fragment)	Os01g0627600 OSNPB_010627600	heme binding [GO:0020037]; iron ion binding [GO:0005506]; monooxygenase activity [GO:0004497]; oxidoreductase activity, acting on paired donors, with incorporation or reduction of molecular oxygen [GO:0016705]			PF00067;
6471	LOC_Os08g32120	188.728	1.70359	0.216772	6.93e-16	2.51e-14	expressed protein	Os08g0416800				A0A0N7KPV1	A0A0N7KPV1_ORYSJ	unreviewed	Os08g0416800 protein (Fragment)	Os08g0416800 OSNPB_080416800
4343	LOC_Os05g10930	76.4008	1.70305	0.281678	2.47e-10	4.24e-09	OsGrx_C15 - glutaredoxin subgroup III, expressed	Os05g0198200	OsGRX16			Q0DK35	GRXC7_ORYSJ	reviewed	Glutaredoxin-C7	GRXC7 Os05g0198200 LOC_Os05g10930 OSJNBa0007C23.5	cell [GO:0005623]; cytoplasm [GO:0005737]; electron transfer activity [GO:0009055]; protein disulfide oxidoreductase activity [GO:0015035]; cell redox homeostasis [GO:0045454]	SUBCELLULAR LOCATION: Cytoplasm {ECO:0000250}.		PF00462;
895	LOC_Os01g59020	69.0628	1.70035	0.287852	5.75e-10	9.32e-09	cytochrome P450, putative, expressed	Os01g0804400	OsCYP94D7			Q8LRA0	Q8LRA0_ORYSJ	unreviewed	Os01g0804400 protein	Os01g0804400 OSNPB_010804400	integral component of membrane [GO:0016021]; heme binding [GO:0020037]; iron ion binding [GO:0005506]; monooxygenase activity [GO:0004497]; oxidoreductase activity, acting on paired donors, with incorporation or reduction of molecular oxygen [GO:0016705]		osa:4327539;	PF00067;
8627	LOC_Os12g41090	6.69318	1.69715	0.938085	0.00786647	0.0279932	CAMK_KIN1/SNF1/Nim1_like.38 - CAMK includes calcium/calmodulin depedent protein kinases, expressed	Os12g0603700	OsCIPK04, CIPK4, OsCIPK4			A0A0P0YC00	A0A0P0YC00_ORYSJ	unreviewed	Os12g0603700 protein	Os12g0603700 OSNPB_120603700	ATP binding [GO:0005524]; protein serine/threonine kinase activity [GO:0004674]			PF00069;
8054	LOC_Os11g35200	9.2697	1.69544	0.772151	0.00360371	0.0145475	retrotransposon protein, putative, unclassified, expressed	NA	NA			Q2R2N6	Q2R2N6_ORYSJ	unreviewed	Retrotransposon protein, putative, unclassified	LOC_Os11g35200	nucleic acid binding [GO:0003676]; DNA integration [GO:0015074]			PF17919;PF00665;PF00078;
7535	LOC_Os10g38600	422.039	1.69354	0.180524	1.12e-21	7.3e-20	glutathione S-transferase GSTU6, putative, expressed	Os10g0529500	OsGSTU30			A0A0N7KS42	A0A0N7KS42_ORYSJ	unreviewed	Os10g0529500 protein (Putative glutathione S-transferase)	Os10g0529500 OsJ_32236 OSJNBa0034L04.17 OSJNBb0038A07.30	cytoplasm [GO:0005737]; glutathione transferase activity [GO:0004364]; glutathione metabolic process [GO:0006749]			PF13417;
1662	LOC_Os02g32660	20.8353	1.68601	0.540568	0.00026897	0.00152416	1,4-alpha-glucan-branching enzyme, chloroplast precursor, putative, expressed	Os02g0528200	SBEIII*, SBEIII, Sbe3, RBE3, QEIIa, QEIIA, BEIIb, BEIIB, SBEIIb, OsBEIIb, sbe3, SBE III, OsSBEIIb, SBEIIb			Q0E0R5	Q0E0R5_ORYSJ	unreviewed	Branching enzyme-3 (Os02g0528200 protein)	Os02g0528200 OsJ_06982 P0475F05.16	1,4-alpha-glucan branching enzyme activity [GO:0003844]; cation binding [GO:0043169]; hydrolase activity, hydrolyzing O-glycosyl compounds [GO:0004553]; glycogen biosynthetic process [GO:0005978]		osa:4329532;	PF00128;PF02806;PF02922;
699	LOC_Os01g50050	28.9863	1.68124	0.418168	9.47e-06	7.66e-05	polyprenyl synthetase, putative, expressed	Os01g0695300				B9EYZ0	B9EYZ0_ORYSJ	unreviewed	Uncharacterized protein	OsJ_03111	transferase activity, transferring alkyl or aryl (other than methyl) groups [GO:0016765]; isoprenoid biosynthetic process [GO:0008299]			PF00348;
3165	LOC_Os03g56160	264.685	1.67845	0.209484	2.06e-16	7.86e-15	lectin-like receptor kinase 7, putative, expressed	Os03g0772600	OsLRk7, LRk7			Q7XZX1	Q7XZX1_ORYSJ	unreviewed	Putative receptor-like kinase	OSJNBb0094O03.4	integral component of membrane [GO:0016021]; ATP binding [GO:0005524]; carbohydrate binding [GO:0030246]; protein tyrosine kinase activity [GO:0004713]			PF00139;PF07714;
1346	LOC_Os02g05970	19.2363	1.67718	0.574267	0.000517109	0.00271348	phytosulfokine receptor precursor, putative, expressed	Os02g0154000	LRK2			Q67IT1	Q67IT1_ORYSJ	unreviewed	Os02g0154000 protein	Os02g0154000 OSNPB_020154000	integral component of membrane [GO:0016021]; ATP binding [GO:0005524]; protein kinase activity [GO:0004672]		osa:4328340;	PF13855;PF08263;PF00069;
479	LOC_Os01g36130	7.71161	1.67623	0.810171	0.0049794	0.0191334	expressed protein	NA	NA			Q8LHG5	Q8LHG5_ORYSJ	unreviewed	Os01g0542400 protein	Os01g0542400 OSNPB_010542400	nucleus [GO:0005634]; DNA-binding transcription factor activity [GO:0003700]; sequence-specific DNA binding [GO:0043565]; transcription regulatory region DNA binding [GO:0044212]; positive regulation of transcription, DNA-templated [GO:0045893]		osa:107278562;
5611	LOC_Os07g03790	134.257	1.6755	0.271967	1.22e-10	2.18e-09	lectin-like receptor kinase 7, putative, expressed	Os07g0129900				Q84ZI6	Q84ZI6_ORYSJ	unreviewed	Os07g0129900 protein (Putative receptor-like protein kinase)	P0483E09.4 Os07g0129900 OSNPB_070129900	integral component of membrane [GO:0016021]; plasma membrane [GO:0005886]; ATP binding [GO:0005524]; carbohydrate binding [GO:0030246]; transmembrane receptor protein serine/threonine kinase activity [GO:0004675]; defense response [GO:0006952]; defense response to bacterium [GO:0042742]; defense response to oomycetes [GO:0002229]		osa:107275881;	PF00139;PF00069;
612	LOC_Os01g45900	25.317	1.6745	0.440502	2.4e-05	0.000176843	OsFBX20 - F-box domain containing protein, expressed	Os01g0647000	OsFbox031, OsFbox31, Os_F0326			Q0JKV5	Q0JKV5_ORYSJ	unreviewed	Os01g0647000 protein	Os01g0647000 OSNPB_010647000	ubiquitin-protein transferase activity [GO:0004842]; SCF-dependent proteasomal ubiquitin-dependent protein catabolic process [GO:0031146]		osa:4325927;	PF00646;
1222	LOC_Os01g72910	29.1822	1.67419	0.512568	0.000155397	0.000935496	abscisic stress-ripening, putative, expressed	Os01g0959200	Asr4, OsASR6, OsASR2, Asr2			A0A0P0VD37	A0A0P0VD37_ORYSJ	unreviewed	Os01g0959200 protein (Fragment)	Os01g0959200 OSNPB_010959200				PF02496;
5647	LOC_Os07g06390	26.5075	1.67372	0.453649	3.56e-05	0.00025249	expressed protein	NA	NA			B9FVK3	B9FVK3_ORYSJ	unreviewed	Uncharacterized protein	OsJ_23143
5648	LOC_Os07g06390	26.5075	1.67372	0.453649	3.56e-05	0.00025249	expressed protein	NA	NA			B9FVK4	B9FVK4_ORYSJ	unreviewed	Uncharacterized protein	OsJ_23144
5830	LOC_Os07g30970	4824.05	1.67191	0.162884	1.84e-25	1.8e-23	nucleoside diphosphate kinase, putative, expressed	Os07g0492000	OsNDPK1, NDK, rNDK, NDK1, NDKR, NDK-1			Q07661	NDK1_ORYSJ	reviewed	Nucleoside diphosphate kinase 1 (EC 2.7.4.6) (Nucleoside diphosphate kinase I) (NDK I) (NDP kinase I) (NDPK I)	NDKR Os07g0492000 LOC_Os07g30970 OJ1218_C12.24 OsJ_023347 P0038F10.104	ATP binding [GO:0005524]; metal ion binding [GO:0046872]; nucleoside diphosphate kinase activity [GO:0004550]; cellular response to hydrogen peroxide [GO:0070301]; CTP biosynthetic process [GO:0006241]; GTP biosynthetic process [GO:0006183]; purine nucleotide metabolic process [GO:0006163]; pyrimidine nucleotide metabolic process [GO:0006220]; UTP biosynthetic process [GO:0006228]		osa:4343275;	PF00334;
5831	LOC_Os07g30970	4824.05	1.67191	0.162884	1.84e-25	1.8e-23	nucleoside diphosphate kinase, putative, expressed	Os07g0492000	OsNDPK1, NDK, rNDK, NDK1, NDKR, NDK-1			B7F7R5	B7F7R5_ORYSJ	unreviewed	Nucleoside diphosphate kinase (EC 2.7.4.6)		ATP binding [GO:0005524]; nucleoside diphosphate kinase activity [GO:0004550]; CTP biosynthetic process [GO:0006241]; GTP biosynthetic process [GO:0006183]; UTP biosynthetic process [GO:0006228]			PF00334;
8394	LOC_Os12g14150	75.2343	1.67092	0.26416	4.46e-11	8.55e-10	expressed protein	Os12g0245100	OsKIX_11			B9GDV2	B9GDV2_ORYSJ	unreviewed	Os12g0245100 protein	Os12g0245100 OsJ_36582	chromatin DNA binding [GO:0031490]		osa:4351882;
47	LOC_Os01g02860	15.8409	1.66934	0.603336	0.000825363	0.0040645	expressed protein	NA	NA			A2ZNM5	A2ZNM5_ORYSJ	unreviewed	Uncharacterized protein	OsJ_00157	SAGA complex [GO:0000124]; transcription coregulator activity [GO:0003712]
1754	LOC_Os02g38000	36.4313	1.66885	0.404525	5.98e-06	5.01e-05	retrotransposon protein, putative, unclassified, expressed	NA	NA			C7IZC8	C7IZC8_ORYSJ	unreviewed	Os03g0680566 protein	Os03g0680566	nucleic acid binding [GO:0003676]; zinc ion binding [GO:0008270]; DNA integration [GO:0015074]			PF12796;PF13976;PF00665;PF07727;
8147	LOC_Os11g44800	8.41431	1.66606	0.80213	0.00487645	0.0188312	expressed protein	Os11g0670900				A3CDS6	A3CDS6_ORYSJ	unreviewed	Os11g0670900 protein	Os11g0670900 OsJ_34777	integral component of membrane [GO:0016021]; cell surface receptor signaling pathway [GO:0007166]		osa:4351087;
2380	LOC_Os03g08350	4.97526	1.66518	1.04615	0.0125186	0.0412822	ubiquitin carboxyl-terminal hydrolase, family 1, putative, expressed	Os03g0181400				Q8H7L3	Q8H7L3_ORYSJ	unreviewed	Membrane associated salt-inducible protein, putative, expressed (cDNA clone:001-124-G07, full insert sequence)	LOC_Os03g08350			osa:4331835;	PF11955;
3401	LOC_Os04g03180	14.6342	1.66456	0.768287	0.00370555	0.0149074	disease resistance protein, putative, expressed	Os04g0122000				Q0JFA0	Q0JFA0_ORYSJ	unreviewed	OSJNBb0089K24.8 protein (Os04g0122000 protein)	Os04g0122000 OSJNBb0089K24.8			osa:4334979;	PF13516;PF13855;PF08263;
306	LOC_Os01g16200	25.569	1.66129	0.481005	8.38e-05	0.000537933	serpin domain containing protein, putative, expressed	Os01g0267300	OsSRP-QKG, OrysaZ12			Q5NBM0	SPZ12_ORYSJ	reviewed	Putative serpin-Z12 (OrysaZ12)	Os01g0267300 LOC_Os01g16200 P0011D01.15	extracellular space [GO:0005615]; serine-type endopeptidase inhibitor activity [GO:0004867]; negative regulation of endopeptidase activity [GO:0010951]		osa:4324380;	PF00079;
5405	LOC_Os06g45040	5.28833	1.66054	1.14492	0.0143807	0.0462639	B-box zinc finger family protein, putative, expressed	Os06g0661200	OsBBX21, BBX21			A0A0P0WZZ0	A0A0P0WZZ0_ORYSJ	unreviewed	Uncharacterized protein OSJNBa0051O02.32	OSJNBa0051O02.32	zinc ion binding [GO:0008270]		osa:107278220;
6928	LOC_Os09g26370	35.0981	1.66023	0.382445	2.41e-06	2.2e-05	DUF581 domain containing protein, expressed	Os09g0433800				Q0J1K4	Q0J1K4_ORYSJ	unreviewed	Os09g0433800 protein	Os09g0433800 OJ1081_G10.16			osa:4347137;	PF04570;
2325	LOC_Os03g05640	400.022	1.6599	0.311472	1.63e-08	2.11e-07	inorganic phosphate transporter, putative, expressed	Os03g0150800	OsPT2, PTH1-2, OsPht1;2, PHT1;2			Q8GSD9	PHT12_ORYSJ	reviewed	Inorganic phosphate transporter 1-2 (OsPT2) (OsPht1;2) (H(+)/Pi cotransporter) (OsPT1)	PTH1-2 PT1 PT2 Os03g0150800 LOC_Os03g05640 OsJ_009088	integral component of membrane [GO:0016021]; inorganic phosphate transmembrane transporter activity [GO:0005315]; symporter activity [GO:0015293]; phosphate ion transport [GO:0006817]	SUBCELLULAR LOCATION: Membrane {ECO:0000255}; Multi-pass membrane protein {ECO:0000255}.	osa:4331637;	PF00083;
2870	LOC_Os03g37411	21.8066	1.65883	0.463519	5.8e-05	0.000391085	MATE efflux family protein, putative, expressed	Os03g0570800				Q0DQQ4	Q0DQQ4_ORYSJ	unreviewed	Os03g0570800 protein	Os03g0570800	integral component of membrane [GO:0016021]; membrane [GO:0016020]; antiporter activity [GO:0015297]; transmembrane transporter activity [GO:0022857]; xenobiotic transmembrane transporter activity [GO:0042910]		osa:4333287;	PF01554;
6718	LOC_Os08g44650	50.356	1.65851	0.324413	5.74e-08	6.81e-07	expressed protein	Os08g0560600				Q6YYX4	Q6YYX4_ORYSJ	unreviewed	Os08g0560600 protein (cDNA clone:002-156-E06, full insert sequence)	Os08g0560600 OSNPB_080560600			osa:4346324;	PF09350;
6205	LOC_Os08g02110	586.828	1.65756	0.153069	4.64e-28	5.45e-26	peroxidase precursor, putative, expressed	Os08g0113000	prx117			Q6ZCC2	Q6ZCC2_ORYSJ	unreviewed	Peroxidase (EC 1.11.1.7)	Os08g0113000 OSNPB_080113000	extracellular region [GO:0005576]; plant-type cell wall [GO:0009505]; plasmodesma [GO:0009506]; heme binding [GO:0020037]; metal ion binding [GO:0046872]; peroxidase activity [GO:0004601]; hydrogen peroxide catabolic process [GO:0042744]; response to oxidative stress [GO:0006979]	SUBCELLULAR LOCATION: Secreted {ECO:0000256|RuleBase:RU362060}.	osa:4344496;	PF00141;
8151	LOC_Os11g44860	47.9924	1.65261	0.343533	2.52e-07	2.73e-06	cysteine-rich receptor-like protein kinase 28 precursor, putative, expressed	Os11g0671950	OsRLCK351			B9G8N9	B9G8N9_ORYSJ	unreviewed	Protein kinase domain-containing protein	OsJ_34707	ATP binding [GO:0005524]; protein kinase activity [GO:0004672]; cell surface receptor signaling pathway [GO:0007166]			PF00069;
8152	LOC_Os11g44860	47.9924	1.65261	0.343533	2.52e-07	2.73e-06	cysteine-rich receptor-like protein kinase 28 precursor, putative, expressed	Os11g0672200	OsRLCK351			B9G8N9	B9G8N9_ORYSJ	unreviewed	Protein kinase domain-containing protein	OsJ_34707	ATP binding [GO:0005524]; protein kinase activity [GO:0004672]; cell surface receptor signaling pathway [GO:0007166]			PF00069;
1137	LOC_Os01g69050	106.624	1.65204	0.237067	5.86e-13	1.42e-11	lysine ketoglutarate reductase trans-splicing related 1, putative, expressed	Os01g0919600				Q5JLN0	Q5JLN0_ORYSJ	unreviewed	Os01g0919600 protein (cDNA clone:J013066P10, full insert sequence)	Os01g0919600 OSNPB_010919600	integral component of membrane [GO:0016021]			PF05212;
475	LOC_Os01g35254	15.0157	1.65147	0.608699	0.000985253	0.00475466	transposon protein, putative, CACTA, En/Spm sub-class, expressed	Os01g0536501				A0A0P0V3P3	A0A0P0V3P3_ORYSJ	unreviewed	Os01g0536600 protein	Os01g0536600	ADP binding [GO:0043531]			PF00931;
5781	LOC_Os07g23900	34.6639	1.64985	0.36851	1.34e-06	1.28e-05	OsFBX234 - F-box domain containing protein, expressed	Os07g0421000	OsFBX234, OsFbox369, Os_F0191			Q7EY22	Q7EY22_ORYSJ	unreviewed	Os07g0421000 protein	Os07g0421000 OSNPB_070421000			osa:4343043;	PF12937;
3418	LOC_Os04g05070	23.5077	1.64959	0.485775	0.000108573	0.000677243	expressed protein	Os04g0137450				Q7XRM6	Q7XRM6_ORYSJ	unreviewed	OSJNBa0095E20.10 protein (Os04g0137400 protein)	Os04g0137400 OSJNBa0095E20.10				PF07795;
6287	LOC_Os08g07970	195.905	1.64947	0.192806	2.22e-18	1.05e-16	transcription factor, putative, expressed	Os08g0176900	OsbZIP64			Q6ZBS8	TGL10_ORYSJ	reviewed	Transcription factor TGAL10 (bZIP transcription factor 64) (OsbZIP64)	TGAL10 Os08g0176900 LOC_Os08g07970 OJ1120_C08.7 P0583B06.15	nucleus [GO:0005634]; DNA-binding transcription factor activity [GO:0003700]; sequence-specific DNA binding [GO:0043565]; defense response [GO:0006952]; transcription, DNA-templated [GO:0006351]	SUBCELLULAR LOCATION: Nucleus {ECO:0000255|PROSITE-ProRule:PRU00978}.		PF00170;PF14144;
3646	LOC_Os04g36830	22.6102	1.6491	0.561688	0.000496765	0.00261633	DUF567 domain containing protein, putative, expressed	Os04g0446000				Q7XRK8	Q7XRK8_ORYSJ	unreviewed	OSJNBa0027P08.17 protein (Os04g0446000 protein)	Os04g0446000 OsJ_14947 OSJNBa0027P08.17			osa:4335964;	PF04525;
2632	LOC_Os03g18550	115.814	1.64786	0.271502	2.17e-10	3.74e-09	mitochondrial carrier protein, putative, expressed	Os03g0296800	MIT			Q10MS7	Q10MS7_ORYSJ	unreviewed	Mitochondrial carrier protein, expressed (Os03g0296800 protein) (cDNA clone:J013112D16, full insert sequence)	LOC_Os03g18550 Os03g0296800 OSNPB_030296800	integral component of membrane [GO:0016021]; transmembrane transporter activity [GO:0022857]			PF00153;
2633	LOC_Os03g18550	115.814	1.64786	0.271502	2.17e-10	3.74e-09	mitochondrial carrier protein, putative, expressed	Os03g0296800	MIT			Q0DSP1	Q0DSP1_ORYSJ	unreviewed	Os03g0296800 protein	Os03g0296800	integral component of membrane [GO:0016021]; iron ion transmembrane transporter activity [GO:0005381]; iron import into the mitochondrion [GO:0048250]		osa:4332542;	PF00153;
2131	LOC_Os02g55480	79.5215	1.64533	0.277785	5.9e-10	9.56e-09	zinc finger, C3HC4 type domain containing protein, expressed	Os02g0798200				Q69QZ7	Q69QZ7_ORYSJ	unreviewed	Os02g0798200 protein (cDNA clone:006-301-G04, full insert sequence) (cDNA clone:006-308-A03, full insert sequence)	Os02g0798200 OSNPB_020798200	ubiquitin protein ligase activity [GO:0061630]; ubiquitin-dependent protein catabolic process [GO:0006511]		osa:4331022;	PF13639;
8059	LOC_Os11g35500	19.5788	1.64525	0.541709	0.000367945	0.00200982	receptor-like protein kinase 5 precursor, putative, expressed	Os11g0559200	Xa21*, Xa21, OsXA21			A3CCD5	A3CCD5_ORYSJ	unreviewed	Os11g0559200 protein	Os11g0559200 OsJ_34269	integral component of membrane [GO:0016021]; ATP binding [GO:0005524]; protein serine/threonine kinase activity [GO:0004674]		osa:9271075;	PF13855;PF08263;PF07714;
5420	LOC_Os06g45710	403.886	1.64298	0.21721	6.9e-15	2.17e-13	phosphoglycerate kinase protein, putative, expressed	Os06g0668200	PGK, OsPGK4			Q655T1	Q655T1_ORYSJ	unreviewed	Phosphoglycerate kinase (EC 2.7.2.3)	Os06g0668200 OSNPB_060668200	cytosol [GO:0005829]; ADP binding [GO:0043531]; ATP binding [GO:0005524]; phosphoglycerate kinase activity [GO:0004618]; gluconeogenesis [GO:0006094]; glycolytic process [GO:0006096]; positive regulation of oxidative phosphorylation [GO:1903862]		osa:4341792;	PF00162;
5808	LOC_Os07g28400	69.9284	1.64122	0.277446	6.07e-10	9.81e-09	CDGSH iron sulfur domain-containing protein 1, putative, expressed	Os07g0467200	OsCDGSH, CDGSH			A3BJJ6	A3BJJ6_ORYSJ	unreviewed	Os07g0467200 protein	Os07g0467200 OsJ_24173	intracellular membrane-bounded organelle [GO:0043231]; 2 iron, 2 sulfur cluster binding [GO:0051537]		osa:4343177;	PF09360;
2727	LOC_Os03g22020	94.222	1.64047	0.246494	5.09e-12	1.1e-10	peroxidase precursor, putative, expressed	Os03g0339400	prx40			Q10LQ5	Q10LQ5_ORYSJ	unreviewed	Peroxidase (EC 1.11.1.7)	LOC_Os03g22020	extracellular region [GO:0005576]; heme binding [GO:0020037]; metal ion binding [GO:0046872]; peroxidase activity [GO:0004601]; hydrogen peroxide catabolic process [GO:0042744]; response to oxidative stress [GO:0006979]	SUBCELLULAR LOCATION: Secreted {ECO:0000256|RuleBase:RU362060}.	osa:9272450;	PF00141;
1334	LOC_Os02g05470	38.2687	1.63679	0.444903	3.87e-05	0.000272363	CCT motif family protein, expressed	Os02g0148000	OsCCT03, OsCMF3			Q6Z438	Q6Z438_ORYSJ	unreviewed	Os02g0148000 protein	Os02g0148000 OSNPB_020148000	nucleus [GO:0005634]; regulation of transcription, DNA-templated [GO:0006355]	SUBCELLULAR LOCATION: Nucleus {ECO:0000256|PROSITE-ProRule:PRU00357}.		PF06203;
1335	LOC_Os02g05470	38.2687	1.63679	0.444903	3.87e-05	0.000272363	CCT motif family protein, expressed	Os02g0148000	OsCCT03, OsCMF3			Q1KMT9	Q1KMT9_ORYSJ	unreviewed	Putative stress resistance-related protein		nucleus [GO:0005634]	SUBCELLULAR LOCATION: Nucleus {ECO:0000256|PROSITE-ProRule:PRU00357}.		PF06203;
619	LOC_Os01g46380	3248.58	1.63439	0.15144	6.73e-28	7.76e-26	ketol-acid reductoisomerase, chloroplast precursor, putative, expressed	Os01g0652600				A2ZW27	A2ZW27_ORYSJ	unreviewed	Ketol-acid reductoisomerase (EC 1.1.1.86) (Acetohydroxy-acid reductoisomerase) (Alpha-keto-beta-hydroxylacyl reductoisomerase)	OsJ_02845	ketol-acid reductoisomerase activity [GO:0004455]; metal ion binding [GO:0046872]; isoleucine biosynthetic process [GO:0009097]; valine biosynthetic process [GO:0009099]		osa:4325375;	PF01450;PF07991;
6509	LOC_Os08g34700	91.7356	1.63139	0.30666	1.87e-08	2.39e-07	GDU1, putative, expressed	Os08g0446800				Q6ZAA9	Q6ZAA9_ORYSJ	unreviewed	Os08g0446800 protein (cDNA, clone: J100040N04, full insert sequence)	Os08g0446800 OSNPB_080446800	integral component of membrane [GO:0016021]; regulation of amino acid export [GO:0080143]		osa:4345709;
7901	LOC_Os11g14160	41.2508	1.63023	0.369085	1.74e-06	1.62e-05	transposon protein, putative, Pong sub-class, expressed	NA	NA			A3CA64	A3CA64_ORYSJ	unreviewed	Transposon protein, putative, ping/pong/SNOOPY sub-class	LOC_Os11g14160 OsJ_33522				PF14303;
7624	LOC_Os10g41040	68.4545	1.63004	0.344683	3.95e-07	4.14e-06	ternary complex factor MIP1, putative, expressed	Os10g0559800				Q0IVQ4	Q0IVQ4_ORYSJ	unreviewed	Os10g0559800 protein	Os10g0559800				PF04784;PF14389;
7625	LOC_Os10g41040	68.4545	1.63004	0.344683	3.95e-07	4.14e-06	ternary complex factor MIP1, putative, expressed	Os10g0559800				Q336S8	Q336S8_ORYSJ	unreviewed	Expressed protein	LOC_Os10g41040			osa:4349372;	PF04784;PF14389;
5613	LOC_Os07g03820	14.782	1.62895	0.603109	0.00104812	0.00501134	lectin-like receptor kinase, putative, expressed	Os07g0130200				Q84ZI3	Q84ZI3_ORYSJ	unreviewed	Putative receptor-like protein kinase	P0483E09.7	integral component of membrane [GO:0016021]; ATP binding [GO:0005524]; carbohydrate binding [GO:0030246]; protein kinase activity [GO:0004672]			PF00139;PF00069;
1416	LOC_Os02g09790	12.8814	1.62839	0.657791	0.00192981	0.00854817	disease resistance protein RPM1, putative, expressed	Os02g0191000				Q6YUT7	Q6YUT7_ORYSJ	unreviewed	Os02g0191000 protein	Os02g0191000 OSNPB_020191000	ADP binding [GO:0043531]		osa:9272257;	PF13855;PF00931;PF18052;
6840	LOC_Os09g17680	29.6362	1.62821	0.442177	3.85e-05	0.000271435	NAD kinase, putative, expressed	Os09g0345700				Q6EQG2	NADHK_ORYSJ	reviewed	Probable NADH kinase (EC 2.7.1.86)	Os09g0345700 LOC_Os09g17680 OSJNBb0085I16.26	cytoplasm [GO:0005737]; ATP binding [GO:0005524]; NAD+ kinase activity [GO:0003951]; NADH kinase activity [GO:0042736]; NAD metabolic process [GO:0019674]; NADP biosynthetic process [GO:0006741]	SUBCELLULAR LOCATION: Cytoplasm {ECO:0000250}.	osa:4346801;	PF01513;
3937	LOC_Os04g50670	5.02076	1.62821	1.0801	0.0142623	0.0459547	expressed protein	NA	NA			H2VFK6	H2VFK6_ORYSJ	unreviewed	OSJNBa0009P12.22 protein	OSJNBa0009P12.22
4584	LOC_Os05g36186	474.529	1.62636	0.224363	7.43e-14	2.02e-12	NA	Os05g0437800				NA	NA	NA	NA	NA	NA	NA	NA	NA
5590	LOC_Os07g02590	33.0554	1.62166	0.384531	4.4e-06	3.8e-05	expressed protein	Os07g0117000				A3BG12	A3BG12_ORYSJ	unreviewed	Uncharacterized protein	OsJ_22887
5591	LOC_Os07g02590	33.0554	1.62166	0.384531	4.4e-06	3.8e-05	expressed protein	Os07g0117000				A0A0P0X1Z4	A0A0P0X1Z4_ORYSJ	unreviewed	Os07g0117000 protein	OJ1119_A04.111 Os07g0117000
7348	LOC_Os10g26620	107.258	1.6207	0.27245	4.95e-10	8.1e-09	dof zinc finger domain containing protein, putative, expressed	Os10g0406300	OsDof26, Dof26, OsDof-26			Q948I5	Q948I5_ORYSJ	unreviewed	Putative H-protein promoter binding factor-2a	OSJNBa0060A14.11	nucleus [GO:0005634]; DNA binding [GO:0003677]; regulation of transcription, DNA-templated [GO:0006355]	SUBCELLULAR LOCATION: Nucleus {ECO:0000256|PROSITE-ProRule:PRU00071}.		PF02701;
8535	LOC_Os12g35610	268.327	1.62055	0.841446	0.00580504	0.0217227	respiratory burst oxidase, putative, expressed	Os12g0541300	rbohH, OsrbohH, Os rbohH, OsNox9, OsRboh9, Os-RbohH, RbohH			Q2QP56	Q2QP56_ORYSJ	unreviewed	Os12g0541300 protein (Respiratory burst oxidase, putative, expressed)	LOC_Os12g35610 Os12g0541300 OSNPB_120541300	integral component of membrane [GO:0016021]; plasma membrane [GO:0005886]; calcium ion binding [GO:0005509]; NAD(P)H oxidase activity [GO:0016174]; peroxidase activity [GO:0004601]; oxidation-reduction process [GO:0055114]		osa:4352439;	PF13405;PF08022;PF01794;PF08030;PF08414;
8536	LOC_Os12g35610	268.327	1.62055	0.841446	0.00580504	0.0217227	respiratory burst oxidase, putative, expressed	Os12g0541300	rbohH, OsrbohH, Os rbohH, OsNox9, OsRboh9, Os-RbohH, RbohH			H2KWW9	H2KWW9_ORYSJ	unreviewed	Respiratory burst oxidase, putative, expressed	LOC_Os12g35610	integral component of membrane [GO:0016021]; calcium ion binding [GO:0005509]; oxidoreductase activity, acting on NAD(P)H, oxygen as acceptor [GO:0050664]; peroxidase activity [GO:0004601]			PF13405;PF08022;PF01794;PF08030;PF08414;
3081	LOC_Os03g52170	539.945	1.61919	0.215565	1.07e-14	3.32e-13	4-hydroxy-3-methylbut-2-enyl diphosphate reductase, putative, expressed	Os03g0731900	OsHDR, OsIspH, IspH, OsHDR1, HDR1			Q6AVG6	ISPH_ORYSJ	reviewed	4-hydroxy-3-methylbut-2-enyl diphosphate reductase, chloroplastic (EC 1.17.7.4)	ISPH Os03g0731900 LOC_Os03g52170 OSJNBa0079G12.18	chloroplast stroma [GO:0009570]; 4 iron, 4 sulfur cluster binding [GO:0051539]; 4-hydroxy-3-methylbut-2-en-1-yl diphosphate reductase activity [GO:0051745]; metal ion binding [GO:0046872]; dimethylallyl diphosphate biosynthetic process [GO:0050992]; isopentenyl diphosphate biosynthetic process, methylerythritol 4-phosphate pathway [GO:0019288]	SUBCELLULAR LOCATION: Plastid, chloroplast stroma {ECO:0000250|UniProtKB:Q94B35}.	osa:4334003;	PF02401;
3082	LOC_Os03g52170	539.945	1.61919	0.215565	1.07e-14	3.32e-13	4-hydroxy-3-methylbut-2-enyl diphosphate reductase, putative, expressed	Os03g0731850				Q6AVG6	ISPH_ORYSJ	reviewed	4-hydroxy-3-methylbut-2-enyl diphosphate reductase, chloroplastic (EC 1.17.7.4)	ISPH Os03g0731900 LOC_Os03g52170 OSJNBa0079G12.18	chloroplast stroma [GO:0009570]; 4 iron, 4 sulfur cluster binding [GO:0051539]; 4-hydroxy-3-methylbut-2-en-1-yl diphosphate reductase activity [GO:0051745]; metal ion binding [GO:0046872]; dimethylallyl diphosphate biosynthetic process [GO:0050992]; isopentenyl diphosphate biosynthetic process, methylerythritol 4-phosphate pathway [GO:0019288]	SUBCELLULAR LOCATION: Plastid, chloroplast stroma {ECO:0000250|UniProtKB:Q94B35}.	osa:4334003;	PF02401;
449	LOC_Os01g32670	92.0679	1.61916	0.303577	1.74e-08	2.24e-07	expressed protein	Os01g0510200				A2ZTN7	A2ZTN7_ORYSJ	unreviewed	Os01g0510200 protein	Os01g0510200 OsJ_01966 P0455H03.46 P0520B06.9			osa:4324024;
5194	LOC_Os06g22390	88.7253	1.61885	0.293137	5.83e-09	8.06e-08	expressed protein	Os06g0329300				Q0DCH3	Q0DCH3_ORYSJ	unreviewed	Os06g0329300 protein	Os06g0329300 OJ1230_H04.6 OsJ_21192			osa:4340917;
4325	LOC_Os05g08800	14.5541	1.6182	0.566183	0.000676875	0.0034262	DUF581 domain containing protein, expressed	Os05g0180500				A0A0P0WIK9	A0A0P0WIK9_ORYSJ	unreviewed	Uncharacterized protein	P0453H11.5			osa:4337981;	PF04570;
3417	LOC_Os04g05010	96.5882	1.61808	0.267011	2.51e-10	4.3e-09	CBS domain containing membrane protein, putative, expressed	Os04g0136700	OsCBSX5			B9FDH3	B9FDH3_ORYSJ	unreviewed	OSJNBa0095E20.4 protein (Os04g0136700 protein)	Os04g0136700 OsJ_13658 OSJNBa0095E20.4			osa:4335011;	PF00571;
6340	LOC_Os08g13780	10.6981	1.61673	0.829328	0.00628211	0.0231764	U-box domain-containing protein, putative, expressed	Os08g0235400	OsPUB69			Q6ZB14	Q6ZB14_ORYSJ	unreviewed	Uncharacterized protein OJ1449_H02.16	OJ1449_H02.16	ubiquitin-protein transferase activity [GO:0004842]			PF04564;
8680	LOC_Os12g43410	11.3458	1.61473	0.684119	0.00267249	0.0112969	thaumatin, putative, expressed	Os12g0629600				Q2QLT1	Q2QLT1_ORYSJ	unreviewed	Thaumatin-like protein, putative	LOC_Os12g43410				PF00314;
360	LOC_Os01g20720	44.2431	1.61418	0.379909	3.75e-06	3.29e-05	CC-NBS-LRR, putative, expressed	Os01g0308300				A0A0P0V1M6	A0A0P0V1M6_ORYSJ	unreviewed	Os01g0308300 protein	Os01g0308300	ADP binding [GO:0043531]			PF00931;PF18052;
7862	LOC_Os11g10260	20.3614	1.61361	0.511244	0.000261647	0.00148613	retrotransposon protein, putative, Ty3-gypsy subclass, expressed	NA	NA			Q2R920	Q2R920_ORYSJ	unreviewed	Retrotransposon protein, putative, Ty3-gypsy subclass	LOC_Os11g10260	integral component of membrane [GO:0016021]; ATP binding [GO:0005524]; protein kinase activity [GO:0004672]; recognition of pollen [GO:0048544]			PF01453;PF08276;PF00069;PF00954;
2859	LOC_Os03g36080	59.6914	1.61327	0.289524	4.64e-09	6.52e-08	expressed protein	Os03g0559700				A0A0P0W019	A0A0P0W019_ORYSJ	unreviewed	Os03g0559700 protein	OSJNBa0023A13.4 Os03g0559700			osa:4333246;
1421	LOC_Os02g09980	8.95486	1.61245	0.796656	0.00567241	0.0213413	expressed protein	Os02g0193200				Q0E356	Q0E356_ORYSJ	unreviewed	Os02g0193200 protein	P0437H03.118 Os02g0193200			osa:4328590;	PF14009;
1455	LOC_Os02g12010	169.575	1.6115	0.272104	5.91e-10	9.56e-09	receptor-like protein kinase precursor, putative, expressed	NA	NA			A0A0N7KEX1	A0A0N7KEX1_ORYSJ	unreviewed	Os02g0211600 protein	Os02g0211600 OSNPB_020211600	integral component of membrane [GO:0016021]; ATP binding [GO:0005524]; protein serine/threonine kinase activity [GO:0004674]		osa:107276008;	PF13855;PF08263;PF00069;
7121	LOC_Os09g37930	65.8694	1.61111	0.361158	1.45e-06	1.37e-05	expressed protein	Os09g0551900				Q69MM0	Q69MM0_ORYSJ	unreviewed	DNA mismatch repair protein-like	P0489D11.32	mismatch repair complex [GO:0032300]; ATP binding [GO:0005524]; ATPase activity [GO:0016887]; mismatched DNA binding [GO:0030983]; mismatch repair [GO:0006298]
7115	LOC_Os09g37540	26.6984	1.6105	0.515538	0.000273125	0.00154411	uncharacterized protein PA4923, putative, expressed	Os09g0547500	LOGL9			B7E7M8	LOGL9_ORYSJ	reviewed	Probable cytokinin riboside 5'-monophosphate phosphoribohydrolase LOGL9 (EC 3.2.2.n1) (Protein LONELY GUY-like 9)	LOGL9 Os09g0547500 LOC_Os09g37540 OSJNBa0038K02.28	cytosol [GO:0005829]; nucleus [GO:0005634]; hydrolase activity, hydrolyzing N-glycosyl compounds [GO:0016799]; cytokinin biosynthetic process [GO:0009691]		osa:4347769;	PF03641;
5	ChrUn.fgenesh.gene.20	143.431	1.60972	0.272371	6.22e-10	1e-08	expressed protein	NA	NA			Q656V1	Q656V1_ORYSJ	unreviewed	Peptidylprolyl isomerase (EC 5.2.1.8)	Os01g0564300 OSNPB_010564300	cytoplasm [GO:0005737]; peptidyl-prolyl cis-trans isomerase activity [GO:0003755]; chaperone-mediated protein folding [GO:0061077]; protein peptidyl-prolyl isomerization [GO:0000413]		osa:4327925;	PF00254;
6250	LOC_Os08g05480	15.6154	1.6094	0.606273	0.00118501	0.00557707	OsFBX261 - F-box domain containing protein, expressed	Os08g0150700	OsFbox407, Os_F0406			Q84PX1	Q84PX1_ORYSJ	unreviewed	Os08g0150700 protein	Os08g0150700 OSNPB_080150700			osa:4344662;	PF14299;
4648	LOC_Os05g39580	65.1605	1.60789	0.323507	1.16e-07	1.32e-06	bet v I allergen family protein, putative, expressed	Os05g0473000	OsPYL/RCAR6, PYL6, OsPYL6, OsPYL5, PYL5			A0A0N7KKY4	A0A0N7KKY4_ORYSJ	unreviewed	Os05g0473000 protein	Os05g0473000 OSNPB_050473000	cytoplasm [GO:0005737]; nucleus [GO:0005634]; abscisic acid binding [GO:0010427]; protein phosphatase inhibitor activity [GO:0004864]; signaling receptor activity [GO:0038023]; abscisic acid-activated signaling pathway [GO:0009738]; regulation of protein serine/threonine phosphatase activity [GO:0080163]		osa:4339083;	PF10604;
1024	LOC_Os01g64890	42.7165	1.60771	0.362947	1.66e-06	1.56e-05	CorA-like magnesium transporter protein, putative, expressed	Os01g0869200	OsMGT1, OsMRS2-2, MGT1, MRS2-2			I7HHE1	I7HHE1_ORYSJ	unreviewed	Magnesium transporter	OsMGT1	integral component of membrane [GO:0016021]; magnesium ion transport [GO:0015693]	SUBCELLULAR LOCATION: Membrane {ECO:0000256|RuleBase:RU366041}; Multi-pass membrane protein {ECO:0000256|RuleBase:RU366041}.	osa:4324927;
7316	LOC_Os10g25010	116.62	1.60752	0.262275	1.66e-10	2.92e-09	OsCML8 - Calmodulin-related calcium sensor protein, expressed	Os10g0389000	OsCML8			Q338P8	CML8_ORYSJ	reviewed	Probable calcium-binding protein CML8 (Calmodulin-like protein 8)	CML8 Os10g0389000 LOC_Os10g25010	centriole [GO:0005814]; centrosome [GO:0005813]; calcium ion binding [GO:0005509]; centriole replication [GO:0007099]; mitotic cell cycle [GO:0000278]		osa:4348517;	PF13499;
1417	LOC_Os02g09810	804.538	1.60636	0.177677	2.87e-20	1.65e-18	amino acid transporter, putative, expressed	Os02g0191300	OsATL6			Q6YUT5	Q6YUT5_ORYSJ	unreviewed	Os02g0191300 protein (cDNA clone:J023027D15, full insert sequence)	Os02g0191300 OSNPB_020191300	integral component of membrane [GO:0016021]; amino acid transmembrane transporter activity [GO:0015171]; amino acid transmembrane transport [GO:0003333]		osa:4328577;	PF01490;
7391	LOC_Os10g31040	20.224	1.60501	0.480009	0.000139458	0.000848151	Citrate transporter protein, putative, expressed	Os10g0447900	SIET5			A0A0P0XUU1	A0A0P0XUU1_ORYSJ	unreviewed	Uncharacterized protein	OsJ_31712	integral component of membrane [GO:0016021]; transmembrane transport [GO:0055085]		osa:4348760;	PF03600;
1136	LOC_Os01g68960	9.12684	1.60181	0.793861	0.00564698	0.0212653	expressed protein	Os01g0918400				A3A0Y5	A3A0Y5_ORYSJ	unreviewed	Uncharacterized protein	OsJ_04556			osa:107280547;
7411	LOC_Os10g32700	518.546	1.60025	0.196989	8.68e-17	3.44e-15	hypersensitive-induced response protein, putative, expressed	Os10g0464000				Q0IX60	Q0IX60_ORYSJ	unreviewed	Os10g0464000 protein (Putative hypersensitive-induced response protein)	Os10g0464000 OsJ_31812 OSJNBa0071K18.18	Golgi apparatus [GO:0005794]; plasma membrane [GO:0005886]; plasmodesma [GO:0009506]; vacuolar membrane [GO:0005774]; protein histidine kinase binding [GO:0043424]		osa:4348831;	PF01145;
1796	LOC_Os02g39884	36.0438	1.59994	0.421328	2.46e-05	0.00018094	expressed protein	Os02g0612200				Q6K632	Q6K632_ORYSJ	unreviewed	Os02g0612200 protein	Os02g0612200 OSNPB_020612200	ADP binding [GO:0043531]		osa:4329962;	PF00931;
3529	LOC_Os04g28780	233.537	1.59986	0.218637	4.98e-14	1.4e-12	serine/threonine-protein kinase receptor precursor, putative, expressed	Os04g0356600				Q7XSF1	Q7XSF1_ORYSJ	unreviewed	Receptor-like serine/threonine-protein kinase (EC 2.7.11.1)	OsJ_14404 OSJNBb0066J23.17	integral component of membrane [GO:0016021]; ATP binding [GO:0005524]; protein serine/threonine kinase activity [GO:0004674]; recognition of pollen [GO:0048544]		osa:4335566;	PF01453;PF08276;PF00069;PF00954;
2170	LOC_Os02g56950	65.9449	1.5981	0.326229	1.8e-07	1.99e-06	expressed protein	Os02g0814600				Q0DWI0	Q0DWI0_ORYSJ	unreviewed	Os02g0814600 protein	Os02g0814600 OSNPB_020814600	Fanconi anaemia nuclear complex [GO:0043240]; cellular response to DNA damage stimulus [GO:0006974]; interstrand cross-link repair [GO:0036297]		osa:4331121;	PF11107;
2171	LOC_Os02g56950	65.9449	1.5981	0.326229	1.8e-07	1.99e-06	expressed protein	Os02g0814600				Q6K8P1	Q6K8P1_ORYSJ	unreviewed	Uncharacterized protein OJ1293_E04.22	OJ1293_E04.22	Fanconi anaemia nuclear complex [GO:0043240]; interstrand cross-link repair [GO:0036297]			PF11107;
7217	LOC_Os10g07548	24.6221	1.59748	0.454759	7.58e-05	0.000491447	wall-associated receptor kinase-like 4 precursor, putative, expressed	Os10g0162840				A3C2T6	A3C2T6_ORYSJ	unreviewed	Uncharacterized protein	OsJ_30809	integral component of membrane [GO:0016021]; ATP binding [GO:0005524]; calcium ion binding [GO:0005509]; polysaccharide binding [GO:0030247]; protein kinase activity [GO:0004672]			PF13947;PF07714;
7218	LOC_Os10g07548	24.6221	1.59748	0.454759	7.58e-05	0.000491447	wall-associated receptor kinase-like 4 precursor, putative, expressed	Os10g0162836	OsRLCK378			A3C2T6	A3C2T6_ORYSJ	unreviewed	Uncharacterized protein	OsJ_30809	integral component of membrane [GO:0016021]; ATP binding [GO:0005524]; calcium ion binding [GO:0005509]; polysaccharide binding [GO:0030247]; protein kinase activity [GO:0004672]			PF13947;PF07714;
5827	LOC_Os07g30240	32.7473	1.59747	0.484948	0.000162367	0.000970733	mutS family domain IV containing protein, expressed	Os07g0486000	OsMSH4, MSH4			B9FX97	B9FX97_ORYSJ	unreviewed	Uncharacterized protein	OsJ_24276	ATP binding [GO:0005524]; mismatched DNA binding [GO:0030983]; mismatch repair [GO:0006298]			PF05192;PF05190;PF00488;
[truncated: 7,607 more rows]

## Sheet: Fe_Leaves_seed_annotated
	X	baseMean	log2FoldChange	lfcSE	pvalue	padj	MSU_annotation	RAPD	Oryzabase_symbol	Custom Annot	References	UNIPROT	Uniprot.Entry.name	Status	Protein.names	Gene.names	Gene.ontology..GO.	Subcellular.location..CC.	Cross.reference..KEGG.	Cross.reference..Pfam.
[truncated: 9,440 more rows]

[truncated: 1 more sheets: Fe_Leaves_mature_annotated]
