# Supplementary material for: Transcriptomic Analysis Revealed Reactive Oxygen Species Scavenging Mechanisms Associated With Ferrous Iron Toxicity in Aromatic Keteki Joha Rice
Source: Front Plant Sci. 2022 Feb 24;13:798580. doi: 10.3389/fpls.2022.798580 (PMC8913046; doi:10.3389/fpls.2022.798580)
Supplement: Supplementary Table S3 — Differentially expressed genes for ROS production and scavenging related genes. [file Table_3.XLSX]

## Sheet: rboh_root
Sl No	RBOH	baseMean	log2FoldChange	lfcSE	pvalue	padj	MSU_annotation	RAPD	Oryzabase_symbol	Custom Annot	References	UNIPROT	Uniprot.Entry.name	Status	Protein.names	Gene.names	Gene.ontology..GO.	Subcellular.location..CC.	Cross.reference..KEGG.	Cross.reference..Pfam.
1	LOC_Os12g35610	268.327	1.62055	0.841446	0.00580504	0.0217227	respiratory burst oxidase, putative, expressed	Os12g0541300	rbohH, OsrbohH, Os rbohH, OsNox9, OsRboh9, Os-RbohH, RbohH			Q2QP56	Q2QP56_ORYSJ	unreviewed	Os12g0541300 protein (Respiratory burst oxidase, putative, expressed)	LOC_Os12g35610 Os12g0541300 OSNPB_120541300	integral component of membrane [GO:0016021]; plasma membrane [GO:0005886]; calcium ion binding [GO:0005509]; NAD(P)H oxidase activity [GO:0016174]; peroxidase activity [GO:0004601]; oxidation-reduction process [GO:0055114]		osa:4352439;	PF13405;PF08022;PF01794;PF08030;PF08414;
2	LOC_Os01g53294	227.613	-0.441773	0.174696	0.00914019	0.0316923	respiratory burst oxidase protein B, putative, expressed	Os01g0734200	rbohA, OsrbohA, Os rbohA, OsRbohA, OsNox2, Nox2, OsRboh2, Rboh2			Q0JJJ9	Q0JJJ9_ORYSJ	unreviewed	Os01g0734200 protein (Fragment)	Os01g0734200	integral component of membrane [GO:0016021]; calcium ion binding [GO:0005509]; oxidoreductase activity, acting on NAD(P)H, oxygen as acceptor [GO:0050664]; peroxidase activity [GO:0004601]			PF08022;PF01794;PF08030;PF08414;
3	LOC_Os11g33120	1166.78	-0.926243	0.256328	0.000123212	0.000757626	respiratory burst oxidase, putative, expressed	Os11g0537400	OsrbohI, Os rbohI, rbohI, OsRbohI, OsRbohF			Q2R351	Q2R351_ORYSJ	unreviewed	Respiratory burst oxidase protein D, putative, expressed	LOC_Os11g33120	integral component of membrane [GO:0016021]; calcium ion binding [GO:0005509]; oxidoreductase activity, acting on NAD(P)H, oxygen as acceptor [GO:0050664]; peroxidase activity [GO:0004601]		osa:107278041;	PF08022;PF01794;PF08030;PF08414;
4	LOC_Os05g45210	298.319	-1.84396	0.210656	3.04e-19	1.6e-17	respiratory burst oxidase, putative, expressed	Os05g0528000	rbohC, OsrbohC, Os rbohC, OsRbohC, OsNox5, Nox5, OsrbohD, OsRboh5, RBOHA, OsRboh5, Rboh5			A0A0P0WPQ4	A0A0P0WPQ4_ORYSJ	unreviewed	Os05g0528000 protein (Putative cytochrome b245 beta chain)	Os05g0528000 OJ1187_E11.11 OsJ_19284	integral component of membrane [GO:0016021]; plasma membrane [GO:0005886]; calcium ion binding [GO:0005509]; NAD(P)H oxidase activity [GO:0016174]; peroxidase activity [GO:0004601]; oxidation-reduction process [GO:0055114]		osa:4339397;	PF08022;PF01794;PF08030;PF08414;
5	LOC_Os01g61880	11.5637	-2.64716	0.805943	0.000100737	0.000634549	respiratory burst oxidase, putative, expressed	Os01g0835500	rbohE, OsrbohE, Os rbohE, OsRbohE, OsNox3, Nox3, OsRboh3, Rboh3			Q8S1T0	Q8S1T0_ORYSJ	unreviewed	Os01g0835500 protein	Os01g0835500 OSNPB_010835500	integral component of membrane [GO:0016021]; plasma membrane [GO:0005886]; calcium ion binding [GO:0005509]; NAD(P)H oxidase activity [GO:0016174]; peroxidase activity [GO:0004601]; oxidation-reduction process [GO:0055114]		osa:4327453;	PF08022;PF01794;PF08030;PF08414;
6	LOC_Os01g25820	1212.15	-2.79113	0.232373	2.71e-34	5.53e-32	respiratory burst oxidase, putative, expressed	Os01g0360200	rbohB, OsrbohB, Os rbohB, OsRbohB, OsNox1, Nox1, Os-RbohB, RbohB, OsRboh1, Rboh1			Q5ZAJ0	RBOHB_ORYSJ	reviewed	Respiratory burst oxidase homolog protein B (EC 1.11.1.-) (EC 1.6.3.-) (NADPH oxidase RBOHB) (OsrbohB)	RBOHB Os01g0360200 LOC_Os01g25820 B1164G11.26 OsJ_01746	integral component of membrane [GO:0016021]; plasma membrane [GO:0005886]; calcium ion binding [GO:0005509]; NAD(P)H oxidase activity [GO:0016174]; peroxidase activity [GO:0004601]; protein self-association [GO:0043621]; oxidation-reduction process [GO:0055114]	SUBCELLULAR LOCATION: Membrane {ECO:0000305}; Multi-pass membrane protein {ECO:0000305}.	osa:4326027;	PF08022;PF01794;PF08030;PF08414;

## Sheet: rboh_leaves_seedling
Sl No	RBOH	baseMean	log2FoldChange	lfcSE	pvalue	padj	MSU_annotation	RAPD	Oryzabase_symbol	Custom Annot	References	UNIPROT	Uniprot.Entry.name	Status	Protein.names	Gene.names	Gene.ontology..GO.	Subcellular.location..CC.	Cross.reference..KEGG.	Cross.reference..Pfam.
1	LOC_Os11g33120	1021.63	0.887789	0.201981	4.82879e-06	4.49769e-05	respiratory burst oxidase, putative, expressed	Os11g0537400	OsrbohI, Os rbohI, rbohI, OsRbohI, OsRbohF			Q2R351	Q2R351_ORYSJ	unreviewed	Respiratory burst oxidase protein D, putative, expressed	LOC_Os11g33120	integral component of membrane [GO:0016021]; calcium ion binding [GO:0005509]; oxidoreductase activity, acting on NAD(P)H, oxygen as acceptor [GO:0050664]; peroxidase activity [GO:0004601]		osa:107278041;	PF08022;PF01794;PF08030;PF08414;
2	LOC_Os05g45210	467.307	-0.432809	0.183654	0.014405	0.0464698	respiratory burst oxidase, putative, expressed	Os05g0528000	rbohC, OsrbohC, Os rbohC, OsRbohC, OsNox5, Nox5, OsrbohD, OsRboh5, RBOHA, OsRboh5, Rboh5			A0A0P0WPQ4	A0A0P0WPQ4_ORYSJ	unreviewed	Os05g0528000 protein (Putative cytochrome b245 beta chain)	Os05g0528000 OJ1187_E11.11 OsJ_19284	integral component of membrane [GO:0016021]; plasma membrane [GO:0005886]; calcium ion binding [GO:0005509]; NAD(P)H oxidase activity [GO:0016174]; peroxidase activity [GO:0004601]; oxidation-reduction process [GO:0055114]		osa:4339397;	PF08022;PF01794;PF08030;PF08414;
3	LOC_Os01g53294	227.098	-0.769202	0.211018	0.000136069	0.000847529	respiratory burst oxidase protein B, putative, expressed	Os01g0734200	rbohA, OsrbohA, Os rbohA, OsRbohA, OsNox2, Nox2, OsRboh2, Rboh2			Q0JJJ9	Q0JJJ9_ORYSJ	unreviewed	Os01g0734200 protein (Fragment)	Os01g0734200	integral component of membrane [GO:0016021]; calcium ion binding [GO:0005509]; oxidoreductase activity, acting on NAD(P)H, oxygen as acceptor [GO:0050664]; peroxidase activity [GO:0004601]			PF08022;PF01794;PF08030;PF08414;
4	LOC_Os01g25820	3233.81	-1.95453	0.215361	1.5683e-20	1.64891e-18	respiratory burst oxidase, putative, expressed	Os01g0360200	rbohB, OsrbohB, Os rbohB, OsRbohB, OsNox1, Nox1, Os-RbohB, RbohB, OsRboh1, Rboh1			Q5ZAJ0	RBOHB_ORYSJ	reviewed	Respiratory burst oxidase homolog protein B (EC 1.11.1.-) (EC 1.6.3.-) (NADPH oxidase RBOHB) (OsrbohB)	RBOHB Os01g0360200 LOC_Os01g25820 B1164G11.26 OsJ_01746	integral component of membrane [GO:0016021]; plasma membrane [GO:0005886]; calcium ion binding [GO:0005509]; NAD(P)H oxidase activity [GO:0016174]; peroxidase activity [GO:0004601]; protein self-association [GO:0043621]; oxidation-reduction process [GO:0055114]	SUBCELLULAR LOCATION: Membrane {ECO:0000305}; Multi-pass membrane protein {ECO:0000305}.	osa:4326027;	PF08022;PF01794;PF08030;PF08414;
5	LOC_Os01g61880	70.6237	-2.44739	0.258469	3.25253e-22	4.23232e-20	respiratory burst oxidase, putative, expressed	Os01g0835500	rbohE, OsrbohE, Os rbohE, OsRbohE, OsNox3, Nox3, OsRboh3, Rboh3			Q8S1T0	Q8S1T0_ORYSJ	unreviewed	Os01g0835500 protein	Os01g0835500 OSNPB_010835500	integral component of membrane [GO:0016021]; plasma membrane [GO:0005886]; calcium ion binding [GO:0005509]; NAD(P)H oxidase activity [GO:0016174]; peroxidase activity [GO:0004601]; oxidation-reduction process [GO:0055114]		osa:4327453;	PF08022;PF01794;PF08030;PF08414;

## Sheet: rboh_leaves_mature
Sl No	RBOH	baseMean	log2FoldChange	lfcSE	pvalue	padj	MSU_annotation	RAPD	Oryzabase_symbol	Custom Annot	References	UNIPROT	Uniprot.Entry.name	Status	Protein.names	Gene.names	Gene.ontology..GO.	Subcellular.location..CC.	Cross.reference..KEGG.	Cross.reference..Pfam.
1	LOC_Os11g33120	1021.63	1.31315	0.206559	8.48486e-11	8.68596e-10	respiratory burst oxidase, putative, expressed	Os11g0537400	OsrbohI, Os rbohI, rbohI, OsRbohI, OsRbohF			Q2R351	Q2R351_ORYSJ	unreviewed	Respiratory burst oxidase protein D, putative, expressed	LOC_Os11g33120	integral component of membrane [GO:0016021]; calcium ion binding [GO:0005509]; oxidoreductase activity, acting on NAD(P)H, oxygen as acceptor [GO:0050664]; peroxidase activity [GO:0004601]		osa:107278041;	PF08022;PF01794;PF08030;PF08414;
2	LOC_Os01g53294	227.098	-0.888418	0.208867	1.31835e-05	6.23903e-05	respiratory burst oxidase protein B, putative, expressed	Os01g0734200	rbohA, OsrbohA, Os rbohA, OsRbohA, OsNox2, Nox2, OsRboh2, Rboh2			Q0JJJ9	Q0JJJ9_ORYSJ	unreviewed	Os01g0734200 protein (Fragment)	Os01g0734200	integral component of membrane [GO:0016021]; calcium ion binding [GO:0005509]; oxidoreductase activity, acting on NAD(P)H, oxygen as acceptor [GO:0050664]; peroxidase activity [GO:0004601]			PF08022;PF01794;PF08030;PF08414;
3	LOC_Os05g38980	7.80423	-2.37939	0.868887	0.000822602	0.00271719	respiratory burst oxidase, putative, expressed	Os05g0465800	rbohD, OsrbohD, Os rbohD, OsRbohD, OsNox4, OsRboh4, Rboh4			B9G1I4	B9G1I4_ORYSJ	unreviewed	Uncharacterized protein	OsJ_27740	integral component of membrane [GO:0016021]; calcium ion binding [GO:0005509]; oxidoreductase activity, acting on NAD(P)H, oxygen as acceptor [GO:0050664]; peroxidase activity [GO:0004601]			PF08022;PF01794;PF08030;PF08414;
4	LOC_Os01g61880	70.6237	-2.65127	0.29279	2.84933e-20	7.61715e-19	respiratory burst oxidase, putative, expressed	Os01g0835500	rbohE, OsrbohE, Os rbohE, OsRbohE, OsNox3, Nox3, OsRboh3, Rboh3			A0A0P0VA55	A0A0P0VA55_ORYSJ	unreviewed	Os01g0835500 protein	Os01g0835500 OSNPB_010835500	integral component of membrane [GO:0016021]; calcium ion binding [GO:0005509]; oxidoreductase activity, acting on NAD(P)H, oxygen as acceptor [GO:0050664]; peroxidase activity [GO:0004601]			PF08022;PF01794;PF08030;PF08414;
5	LOC_Os05g45210	467.307	-3.4257	0.203815	3.24631e-64	1.13031e-61	respiratory burst oxidase, putative, expressed	Os05g0528000	rbohC, OsrbohC, Os rbohC, OsRbohC, OsNox5, Nox5, OsrbohD, OsRboh5, RBOHA, OsRboh5, Rboh5			A0A0P0WPQ4	A0A0P0WPQ4_ORYSJ	unreviewed	Os05g0528000 protein (Putative cytochrome b245 beta chain)	Os05g0528000 OJ1187_E11.11 OsJ_19284	integral component of membrane [GO:0016021]; plasma membrane [GO:0005886]; calcium ion binding [GO:0005509]; NAD(P)H oxidase activity [GO:0016174]; peroxidase activity [GO:0004601]; oxidation-reduction process [GO:0055114]		osa:4339397;	PF08022;PF01794;PF08030;PF08414;
6	LOC_Os01g25820	3233.81	-3.98196	0.215344	1.79389e-77	1.50639e-74	respiratory burst oxidase, putative, expressed	Os01g0360200	rbohB, OsrbohB, Os rbohB, OsRbohB, OsNox1, Nox1, Os-RbohB, RbohB, OsRboh1, Rboh1			Q5ZAJ0	RBOHB_ORYSJ	reviewed	Respiratory burst oxidase homolog protein B (EC 1.11.1.-) (EC 1.6.3.-) (NADPH oxidase RBOHB) (OsrbohB)	RBOHB Os01g0360200 LOC_Os01g25820 B1164G11.26 OsJ_01746	integral component of membrane [GO:0016021]; plasma membrane [GO:0005886]; calcium ion binding [GO:0005509]; NAD(P)H oxidase activity [GO:0016174]; peroxidase activity [GO:0004601]; protein self-association [GO:0043621]; oxidation-reduction process [GO:0055114]	SUBCELLULAR LOCATION: Membrane {ECO:0000305}; Multi-pass membrane protein {ECO:0000305}.	osa:4326027;	PF08022;PF01794;PF08030;PF08414;

## Sheet: CAT_root
Sl No	CAT	baseMean	log2FoldChange	lfcSE	pvalue	padj	MSU_annotation	RAPD	Oryzabase_symbol	Custom Annot	References	UNIPROT	Uniprot.Entry.name	Status	Protein.names	Gene.names	Gene.ontology..GO.	Subcellular.location..CC.	Cross.reference..KEGG.	Cross.reference..Pfam.
1	LOC_Os02g02400	1062.22	1.25883	0.54234	0.0042815	0.0168701	catalase isozyme A, putative, expressed	Os02g0115700	CATA1, Cat A1*, OSCAT-A, Cat2, CatA1, CAT-A, OsCatA, OsCAT, CAT, catA, OSCATA, OsCATc, OsCATA, OsCAT1A, CAT1			B7EAG0	B7EAG0_ORYSJ	unreviewed	Catalase (EC 1.11.1.6)		catalase activity [GO:0004096]; heme binding [GO:0020037]; metal ion binding [GO:0046872]; hydrogen peroxide catabolic process [GO:0042744]; response to oxidative stress [GO:0006979]		osa:4328073;	PF00199;PF06628;

## Sheet: CAT_leaves_seedling
Sl No	CAT	baseMean	log2FoldChange	lfcSE	pvalue	padj	MSU_annotation	RAPD	Oryzabase_symbol	Custom Annot	References	UNIPROT	Uniprot.Entry.name	Status	Protein.names	Gene.names	Gene.ontology..GO.	Subcellular.location..CC.	Cross.reference..KEGG.	Cross.reference..Pfam.
1	LOC_Os06g51150	3605.68	2.55381	0.280088	8.4301e-21	9.23272e-19	catalase isozyme B, putative, expressed	Os06g0727200	CatB, CAT-B, OsCatB, OsCATB, OsCAT1B, CAT1B, CAT2, OsCAT2			Q0D9C4	CATA2_ORYSJ	reviewed	Catalase isozyme B (CAT-B) (EC 1.11.1.6)	CATB Os06g0727200 LOC_Os06g51150 OsJ_021830 P0017G10.17	cytoplasm [GO:0005737]; glyoxysome [GO:0009514]; peroxisome [GO:0005777]; plasma membrane [GO:0005886]; catalase activity [GO:0004096]; heme binding [GO:0020037]; metal ion binding [GO:0046872]; circadian rhythm [GO:0007623]; hydrogen peroxide catabolic process [GO:0042744]; regulation of cellular response to heat [GO:1900034]; response to abscisic acid [GO:0009737]; response to absence of light …	SUBCELLULAR LOCATION: Peroxisome {ECO:0000269|PubMed:26900141, ECO:0000305|PubMed:21398647}. Glyoxysome {ECO:0000305}. Cell membrane {ECO:0000269|PubMed:29581216}.	osa:4342124;	PF00199;PF06628;

## Sheet: CAT_leaves_mature
Sl No	CAT	baseMean	log2FoldChange	lfcSE	pvalue	padj	MSU_annotation	RAPD	Oryzabase_symbol	Custom Annot	References	UNIPROT	Uniprot.Entry.name	Status	Protein.names	Gene.names	Gene.ontology..GO.	Subcellular.location..CC.	Cross.reference..KEGG.	Cross.reference..Pfam.
1	LOC_Os03g03910	6243.28	6.70853	0.586393	1.33216e-31	8.5471e-30	catalase domain containing protein, expressed	Os03g0131200	OsCat, OsCatC, OsCATC, NOE1, noe1, catC, OsCATC, CAT3, OsCAT3			Q10S82	CATA3_ORYSJ	reviewed	Catalase isozyme C (CAT-C) (OsCatC) (EC 1.11.1.6) (Protein NITRIC OXIDE EXCESS 1)	CATC CAT1 NOE1 LOC_Os03g03910 Os03g0131200 OsJ_09293 OSNPB_030131200	cell [GO:0005623]; cytoplasm [GO:0005737]; glyoxysome [GO:0009514]; peroxisome [GO:0005777]; plasma membrane [GO:0005886]; catalase activity [GO:0004096]; heme binding [GO:0020037]; metal ion binding [GO:0046872]; cell redox homeostasis [GO:0045454]; circadian rhythm [GO:0007623]; hydrogen peroxide biosynthetic process [GO:0050665]; hydrogen peroxide catabolic process [GO:0042744]; nitric oxide h…	SUBCELLULAR LOCATION: Peroxisome {ECO:0000269|PubMed:26900141, ECO:0000305|PubMed:21398647}. Glyoxysome {ECO:0000305}. Cell membrane {ECO:0000269|PubMed:29581216}.	osa:4331509;	PF00199;PF06628;
2	LOC_Os06g51150	3605.68	-1.59075	0.279814	4.19133e-09	3.44563e-08	catalase isozyme B, putative, expressed	Os06g0727200	CatB, CAT-B, OsCatB, OsCATB, OsCAT1B, CAT1B, CAT2, OsCAT2			Q0D9C4	CATA2_ORYSJ	reviewed	Catalase isozyme B (CAT-B) (EC 1.11.1.6)	CATB Os06g0727200 LOC_Os06g51150 OsJ_021830 P0017G10.17	cytoplasm [GO:0005737]; glyoxysome [GO:0009514]; peroxisome [GO:0005777]; plasma membrane [GO:0005886]; catalase activity [GO:0004096]; heme binding [GO:0020037]; metal ion binding [GO:0046872]; circadian rhythm [GO:0007623]; hydrogen peroxide catabolic process [GO:0042744]; regulation of cellular response to heat [GO:1900034]; response to abscisic acid [GO:0009737]; response to absence of light …	SUBCELLULAR LOCATION: Peroxisome {ECO:0000269|PubMed:26900141, ECO:0000305|PubMed:21398647}. Glyoxysome {ECO:0000305}. Cell membrane {ECO:0000269|PubMed:29581216}.	osa:4342124;	PF00199;PF06628;
3	LOC_Os02g02400	10958.9	-2.4263	0.291894	1.4001e-17	2.95449e-16	catalase isozyme A, putative, expressed	Os02g0115700	CATA1, Cat A1*, OSCAT-A, Cat2, CatA1, CAT-A, OsCatA, OsCAT, CAT, catA, OSCATA, OsCATc, OsCATA, OsCAT1A, CAT1			B7EAG0	B7EAG0_ORYSJ	unreviewed	Catalase (EC 1.11.1.6)		catalase activity [GO:0004096]; heme binding [GO:0020037]; metal ion binding [GO:0046872]; hydrogen peroxide catabolic process [GO:0042744]; response to oxidative stress [GO:0006979]		osa:4328073;	PF00199;PF06628;

## Sheet: SOD_root
Sl No	SOD	baseMean	log2FoldChange	lfcSE	pvalue	padj	MSU_annotation	RAPD	Oryzabase_symbol	Custom Annot	References	UNIPROT	Uniprot.Entry.name	Status	Protein.names	Gene.names	Gene.ontology..GO.	Subcellular.location..CC.	Cross.reference..KEGG.	Cross.reference..Pfam.
1	LOC_Os03g11960	655.751	1.53415	0.177491	1.08e-18	5.37e-17	copper/zinc superoxide dismutase, putative, expressed	Os03g0219200	OsSOD2, OsSOD2-Cu/Zn, SOD2-Cu/Zn			Q10PW3	Q10PW3_ORYSJ	unreviewed	Superoxide dismutase 2, putative, expressed	LOC_Os03g11960	metal ion binding [GO:0046872]; superoxide metabolic process [GO:0006801]			PF00080;
2	LOC_Os03g22810	2096.29	-0.352149	0.127118	0.00487965	0.0188335	copper/zinc superoxide dismutase, putative, expressed	Os03g0351500	sodCc1, SODCC.1, sodA, RSODA, OsSOD1, OsCSD2, OsSodA, SodCc2, OsSODA1, SODCc1-Cu/Zn, OsCu/Zn-SOD2, Cu/Zn-SOD2, OsCSD1.2, CSD1.2, OsSODCc1-Cu/Zn, SODCc1-Cu/Zn, CuZnSOD1, Cu/ZnSOD1			Q10LG5	Q10LG5_ORYSJ	unreviewed	Superoxide dismutase 1, putative, expressed	LOC_Os03g22810	metal ion binding [GO:0046872]; superoxide dismutase activity [GO:0004784]			PF00080;
3	LOC_Os08g44770	241.479	-0.552838	0.178507	0.00138538	0.0064024	copper/zinc superoxide dismutase, putative, expressed	Os08g0561700	OsSOD4, OsCSD4, OsCu/Zn-SOD1, Cu/Zn-SOD1, OsCSD2, CSD2, OsSOD4-Cu/Zn, SOD4-Cu/Zn, Cu/ZnSOD3, CuZnSOD3, sodCp, OssodCp			P93407	SODCP_ORYSJ	reviewed	Superoxide dismutase [Cu-Zn], chloroplastic (EC 1.15.1.1)	SODCP Os08g0561700 LOC_Os08g44770 P0543D10.3 P0604E01.43	apoplast [GO:0048046]; chloroplast stroma [GO:0009570]; extracellular region [GO:0005576]; extracellular space [GO:0005615]; thylakoid [GO:0009579]; copper ion binding [GO:0005507]; superoxide dismutase activity [GO:0004784]; cellular response to light intensity [GO:0071484]; cellular response to ozone [GO:0071457]; cellular response to salt stress [GO:0071472]; cellular response to sucrose stimu…	SUBCELLULAR LOCATION: Plastid, chloroplast.	osa:4346329;	PF00080;

## Sheet: SOD_leaves_seedling
Sl No	SOD	baseMean	log2FoldChange	lfcSE	pvalue	padj	MSU_annotation	RAPD	Oryzabase_symbol	Custom Annot	References	UNIPROT	Uniprot.Entry.name	Status	Protein.names	Gene.names	Gene.ontology..GO.	Subcellular.location..CC.	Cross.reference..KEGG.	Cross.reference..Pfam.
1	LOC_Os07g46990	1105.02	1.05179	0.257808	1.50649e-05	0.000122899	copper/zinc superoxide dismutase, putative, expressed	Os07g0665200	Cu/Zn-SOD, Cu/Zn- SOD, OsSODB, OsSOD3, SodCc2, Os SodCc2, sodB, OsSodB, RSODB, OssodCc1, OsCSD1.1, CSD1.1, OsCDS1, OsSOD3-CU/Zn, SOD3-CU/Zn, CuZnSOD2, Cu/ZnSOD2			P28757	SODC2_ORYSJ	reviewed	Superoxide dismutase [Cu-Zn] 2 (EC 1.15.1.1)	SODCC2 SODCC.2 Os07g0665200 LOC_Os07g46990 OJ1343_D04.132 P0450A04.103	cytoplasm [GO:0005737]; extracellular region [GO:0005576]; extracellular space [GO:0005615]; copper ion binding [GO:0005507]; superoxide dismutase activity [GO:0004784]; removal of superoxide radicals [GO:0019430]	SUBCELLULAR LOCATION: Cytoplasm.	osa:4344210;	PF00080;
2	LOC_Os06g02500	334.758	-0.945015	0.265408	0.000134905	0.000841275	superoxide dismutase, chloroplast, putative, expressed	Os06g0115400	OsFSD1.1, OsSOD-Fe, SOD-Fe, FeSOD1			Q5VRL3	SODF1_ORYSJ	reviewed	Superoxide dismutase [Fe] 1, chloroplastic (EC 1.15.1.1)	Os06g0115400 LOC_Os06g02500 OsJ_19901 OSJNBa0019F11.15-1 P0541H01.37-1	chloroplast nucleoid [GO:0042644]; metal ion binding [GO:0046872]; superoxide dismutase activity [GO:0004784]	SUBCELLULAR LOCATION: Plastid, chloroplast {ECO:0000250}.	osa:4339922;	PF02777;PF00081;

## Sheet: SOD_leaves_mature
Sl No	SOD	baseMean	log2FoldChange	lfcSE	pvalue	padj	MSU_annotation	RAPD	Oryzabase_symbol	Custom Annot	References	UNIPROT	Uniprot.Entry.name	Status	Protein.names	Gene.names	Gene.ontology..GO.	Subcellular.location..CC.	Cross.reference..KEGG.	Cross.reference..Pfam.
1	LOC_Os07g46990	1105.02	2.37544	0.265955	6.17323e-20	1.60083e-18	copper/zinc superoxide dismutase, putative, expressed	Os07g0665200	Cu/Zn-SOD, Cu/Zn- SOD, OsSODB, OsSOD3, SodCc2, Os SodCc2, sodB, OsSodB, RSODB, OssodCc1, OsCSD1.1, CSD1.1, OsCDS1, OsSOD3-CU/Zn, SOD3-CU/Zn, CuZnSOD2, Cu/ZnSOD2			P28757	SODC2_ORYSJ	reviewed	Superoxide dismutase [Cu-Zn] 2 (EC 1.15.1.1)	SODCC2 SODCC.2 Os07g0665200 LOC_Os07g46990 OJ1343_D04.132 P0450A04.103	cytoplasm [GO:0005737]; extracellular region [GO:0005576]; extracellular space [GO:0005615]; copper ion binding [GO:0005507]; superoxide dismutase activity [GO:0004784]; removal of superoxide radicals [GO:0019430]	SUBCELLULAR LOCATION: Cytoplasm.	osa:4344210;	PF00080;
2	LOC_Os03g22810	1147.5	1.20258	0.199271	7.7541e-10	7.06405e-09	copper/zinc superoxide dismutase, putative, expressed	Os03g0351500	sodCc1, SODCC.1, sodA, RSODA, OsSOD1, OsCSD2, OsSodA, SodCc2, OsSODA1, SODCc1-Cu/Zn, OsCu/Zn-SOD2, Cu/Zn-SOD2, OsCSD1.2, CSD1.2, OsSODCc1-Cu/Zn, SODCc1-Cu/Zn, CuZnSOD1, Cu/ZnSOD1			Q10LG5	Q10LG5_ORYSJ	unreviewed	Superoxide dismutase 1, putative, expressed	LOC_Os03g22810	metal ion binding [GO:0046872]; superoxide dismutase activity [GO:0004784]			PF00080;
3	LOC_Os03g11960	534.42	0.518557	0.225781	0.0190327	0.0432129	copper/zinc superoxide dismutase, putative, expressed	Os03g0219200	OsSOD2, OsSOD2-Cu/Zn, SOD2-Cu/Zn			Q10PW4	Q10PW4_ORYSJ	unreviewed	Superoxide dismutase [Cu-Zn] (EC 1.15.1.1)	LOC_Os03g11960	metal ion binding [GO:0046872]; superoxide dismutase activity [GO:0004784]		osa:4332082;	PF00080;
4	LOC_Os06g02500	334.758	-1.12309	0.265914	1.14939e-05	5.50055e-05	superoxide dismutase, chloroplast, putative, expressed	Os06g0115400	OsFSD1.1, OsSOD-Fe, SOD-Fe, FeSOD1			Q5VRL3	SODF1_ORYSJ	reviewed	Superoxide dismutase [Fe] 1, chloroplastic (EC 1.15.1.1)	Os06g0115400 LOC_Os06g02500 OsJ_19901 OSJNBa0019F11.15-1 P0541H01.37-1	chloroplast nucleoid [GO:0042644]; metal ion binding [GO:0046872]; superoxide dismutase activity [GO:0004784]	SUBCELLULAR LOCATION: Plastid, chloroplast {ECO:0000250}.	osa:4339922;	PF02777;PF00081;

## Sheet: GR_root
Sl No	GR	baseMean	log2FoldChange	lfcSE	pvalue	padj	MSU_annotation	RAPD	Oryzabase_symbol	Custom Annot	References	UNIPROT	Uniprot.Entry.name	Status	Protein.names	Gene.names	Gene.ontology..GO.	Subcellular.location..CC.	Cross.reference..KEGG.	Cross.reference..Pfam.
1	LOC_Os10g28000	74.2258	1.28336	0.272081	6.29e-07	6.35e-06	glutathione reductase, putative, expressed	Os10g0415300	OsGR3, GR3			A0A0P0XUU0	A0A0P0XUU0_ORYSJ	unreviewed	Os10g0415300 protein (Fragment)	Os10g0415300 OSNPB_100415300	cell [GO:0005623]; cytoplasm [GO:0005737]; flavin adenine dinucleotide binding [GO:0050660]; thioredoxin-disulfide reductase activity [GO:0004791]; cell redox homeostasis [GO:0045454]			PF07992;PF02852;
2	LOC_Os02g56850	1117.4	0.419553	0.119256	0.000363635	0.00199014	glutathione reductase, putative, expressed	Os02g0813500	OsGR2, RGRC2, GR2, OsGR, OsGR3, OsRGRC2			P48642	GSHRC_ORYSJ	reviewed	Glutathione reductase, cytosolic (GR) (GRase) (EC 1.8.1.7)	GRC2 RGRC2 Os02g0813500 LOC_Os02g56850 OJ1293_E04.4-1 OsJ_08842 OSJNBa0053L11.26-1	cell [GO:0005623]; cytoplasm [GO:0005737]; peroxisome [GO:0005777]; electron transfer activity [GO:0009055]; flavin adenine dinucleotide binding [GO:0050660]; glutathione-disulfide reductase activity [GO:0004362]; NADP binding [GO:0050661]; thioredoxin-disulfide reductase activity [GO:0004791]; cell redox homeostasis [GO:0045454]; glutathione metabolic process [GO:0006749]	SUBCELLULAR LOCATION: Cytoplasm.	osa:4331112;	PF07992;PF02852;

[truncated: 23 more sheets: GR_leaves_seedling, GR_leaves_mature, APX_root, APX_leaves_seedling, APX_leaves_mature, GPX_root, GPX_leaves_seedling, GPX_leaves_mature, PRX_root, PRX_leaves_seedling, PRX_leaves_mature, TRX_root, TRX_leaves_seedling, TRX_leaves_mature, POX_root, POX_leaves_seedling, POX_leaves_mature, GRX_root, GRX_leaves_seedling, GRX_leaves_mature …]
