# Supplementary material for: Transcriptomic Analysis Revealed Reactive Oxygen Species Scavenging Mechanisms Associated With Ferrous Iron Toxicity in Aromatic Keteki Joha Rice
Source: Front Plant Sci. 2022 Feb 24;13:798580. doi: 10.3389/fpls.2022.798580 (PMC8913046; doi:10.3389/fpls.2022.798580)
Supplement: Supplementary Table S4 — Differential expression of transcription factors. [file Table_4.XLSX]

## Sheet: ARF_root
Sl No	ARF	baseMean	log2FoldChange	lfcSE	pvalue	padj	MSU_annotation	RAPD	Oryzabase_symbol	Custom.Annot	References	UNIPROT	Uniprot.Entry.name	Status	Protein.names	Gene.names	Gene.ontology..GO.	Subcellular.location..CC.	Cross.reference..KEGG.	Cross.reference..Pfam.
1	LOC_Os08g40900	230.571	0.642834	0.244614	0.00537809	0.0204075	auxin response factor, putative, expressed	Os08g0520500	OsARF7b, OsARF21, DLN216, OsDLN216			Q6YZW0	ARFU_ORYSJ	reviewed	Auxin response factor 21 (OsARF7b)	ARF21 ARF7B Os08g0520500 LOC_Os08g40900 OJ1003_A09.14 P0689E12.38	nucleus [GO:0005634]; DNA binding [GO:0003677]; auxin-activated signaling pathway [GO:0009734]; regulation of transcription, DNA-templated [GO:0006355]	SUBCELLULAR LOCATION: Nucleus {ECO:0000255|PROSITE-ProRule:PRU00326}.	osa:4346065;	PF02309;PF06507;PF02362;
2	LOC_Os08g40900	230.571	0.642834	0.244614	0.00537809	0.0204075	auxin response factor, putative, expressed	Os08g0520550				Q6YZW0	ARFU_ORYSJ	reviewed	Auxin response factor 21 (OsARF7b)	ARF21 ARF7B Os08g0520500 LOC_Os08g40900 OJ1003_A09.14 P0689E12.38	nucleus [GO:0005634]; DNA binding [GO:0003677]; auxin-activated signaling pathway [GO:0009734]; regulation of transcription, DNA-templated [GO:0006355]	SUBCELLULAR LOCATION: Nucleus {ECO:0000255|PROSITE-ProRule:PRU00326}.	osa:4346065;	PF02309;PF06507;PF02362;
3	LOC_Os01g13520	218.458	-0.452101	0.173234	0.00726115	0.026208	auxin response factor 1, putative, expressed	Os01g0236300	OsARF16, OsARF2, OsARF1			C6F1M3	C6F1M3_ORYSJ	unreviewed	Auxin response factor		nucleus [GO:0005634]; DNA binding [GO:0003677]; auxin-activated signaling pathway [GO:0009734]; regulation of transcription, DNA-templated [GO:0006355]	SUBCELLULAR LOCATION: Nucleus {ECO:0000256|RuleBase:RU004561, ECO:0000256|SAAS:SAAS01220403}.	osa:4327785;	PF02309;PF06507;PF02362;
4	LOC_Os01g13520	218.458	-0.452101	0.173234	0.00726115	0.026208	auxin response factor 1, putative, expressed	Os01g0236300	OsARF16, OsARF2, OsARF1			B9EUK4	B9EUK4_ORYSJ	unreviewed	Auxin response factor	OsJ_01030	nucleus [GO:0005634]; DNA binding [GO:0003677]; auxin-activated signaling pathway [GO:0009734]; regulation of transcription, DNA-templated [GO:0006355]	SUBCELLULAR LOCATION: Nucleus {ECO:0000256|RuleBase:RU004561, ECO:0000256|SAAS:SAAS01220403}.		PF02309;PF06507;PF02362;
5	LOC_Os04g57610	90.3711	-0.595936	0.225354	0.00542237	0.0205403	auxin response factor, putative, expressed	Os04g0671900	OsARF8, OsARF12, ARF12			Q0J951	ARFL_ORYSJ	reviewed	Auxin response factor 12 (OsARF8)	ARF12 ARF8 Os04g0671900 LOC_Os04g57610 OsJ_16583 OSJNBb0004A17.6	nucleus [GO:0005634]; DNA binding [GO:0003677]; auxin-activated signaling pathway [GO:0009734]; regulation of transcription, DNA-templated [GO:0006355]	SUBCELLULAR LOCATION: Nucleus {ECO:0000255|PROSITE-ProRule:PRU00326}.	osa:4337363;	PF02309;PF06507;PF02362;
6	LOC_Os02g41800	71.9069	-0.913059	0.304648	0.00110341	0.00524169	auxin response factor, putative, expressed	Os02g0628600	OsARF8			Q6K223	ARFH_ORYSJ	reviewed	Auxin response factor 8	ARF8 Os02g0628600 LOC_Os02g41800 B1469H02.12 OsJ_07601	nucleus [GO:0005634]; DNA binding [GO:0003677]; auxin-activated signaling pathway [GO:0009734]; regulation of transcription, DNA-templated [GO:0006355]	SUBCELLULAR LOCATION: Nucleus {ECO:0000255|PROSITE-ProRule:PRU00326}.	osa:4330045;	PF06507;PF02362;
7	LOC_Os01g70270	967.783	-1.0209	0.184374	1.14e-08	1.51e-07	auxin response factor, putative, expressed	Os01g0927600	OsARF2, OsARF4, ARF4			Q5JK20	ARFD_ORYSJ	reviewed	Auxin response factor 4 (OsARF2)	ARF4 ARF2 Os01g0927600 LOC_Os01g70270 OSJNBa0093F16.35	nucleus [GO:0005634]; DNA binding [GO:0003677]; auxin-activated signaling pathway [GO:0009734]; regulation of transcription, DNA-templated [GO:0006355]	SUBCELLULAR LOCATION: Nucleus {ECO:0000255|PROSITE-ProRule:PRU00326}.	osa:4326957;	PF02309;PF06507;PF02362;
8	LOC_Os02g35140	420.333	-1.09608	0.159346	2.07e-12	4.72e-11	auxin response factor 7, putative, expressed	Os02g0557200	OsARF7			Q6YVY0	ARFG_ORYSJ	reviewed	Auxin response factor 7	ARF7 Os02g0557200 LOC_Os02g35140 OsJ_07141 OSJNBb0038F20.6	nucleus [GO:0005634]; DNA binding [GO:0003677]; auxin-activated signaling pathway [GO:0009734]; regulation of transcription, DNA-templated [GO:0006355]	SUBCELLULAR LOCATION: Nucleus {ECO:0000255|PROSITE-ProRule:PRU00326}.	osa:4329672;	PF02309;PF06507;PF02362;
9	LOC_Os04g36054	456.097	-1.13953	0.157656	1.58e-13	4.1e-12	auxin response factor 9, putative, expressed	Os04g0442000	OsARF9			Q0JCZ4	ARFI_ORYSJ	reviewed	Auxin response factor 9	ARF9 Os04g0442000 LOC_Os04g36054 OSJNBa0064D20.11	nucleus [GO:0005634]; DNA binding [GO:0003677]; auxin-activated signaling pathway [GO:0009734]; regulation of transcription, DNA-templated [GO:0006355]	SUBCELLULAR LOCATION: Nucleus {ECO:0000255|PROSITE-ProRule:PRU00326}.	osa:4335934;	PF02309;PF06507;PF02362;

## Sheet: ARF_leaves_seedling
S	ARF	baseMean	log2FoldChange	lfcSE	pvalue	padj	MSU_annotation	RAPD	Oryzabase_symbol	Custom.Annot	References	UNIPROT	Uniprot.Entry.name	Status	Protein.names	Gene.names	Gene.ontology..GO.	Subcellular.location..CC.	Cross.reference..KEGG.	Cross.reference..Pfam.
8	LOC_Os06g09660	364.035	2.55596	0.505068	3.43e-08	5.23e-07	auxin response factor, putative, expressed	Os06g0196700	OsARF16	NA	NA	A3B9A0	ARFP_ORYSJ	reviewed	Auxin response factor 16	ARF16 Os06g0196700 LOC_Os06g09660 OsJ_019622	nucleus [GO:0005634]; DNA binding [GO:0003677]; auxin-activated signaling pathway [GO:0009734]; regulation of transcription, DNA-templated [GO:0006355]	SUBCELLULAR LOCATION: Nucleus {ECO:0000255|PROSITE-ProRule:PRU00326}.	osa:9270361;	PF02309;PF06507;PF02362;
10	LOC_Os06g48950	394.842	0.868891	0.326279	0.00321859	0.0132209	auxin response factor 19, putative, expressed	Os06g0702600	OsARF7a, OsARF19, ARF19, OsARF7	NA	NA	Q0D9R7	ARFS_ORYSJ	reviewed	Auxin response factor 19 (OsARF7a)	ARF19 ARF7A Os06g0702600 LOC_Os06g48950 OJ1215_E11.1 P0596H10.43	nucleus [GO:0005634]; DNA binding [GO:0003677]; auxin-activated signaling pathway [GO:0009734]; regulation of transcription, DNA-templated [GO:0006355]	SUBCELLULAR LOCATION: Nucleus {ECO:0000255|PROSITE-ProRule:PRU00326}.	osa:4341978;	PF02309;PF06507;PF02362;
3	LOC_Os01g70270	2317.52	0.589084	0.211678	0.00344683	0.0140247	auxin response factor, putative, expressed	Os01g0927600	OsARF2, OsARF4, ARF4	NA	NA	Q5JK20	ARFD_ORYSJ	reviewed	Auxin response factor 4 (OsARF2)	ARF4 ARF2 Os01g0927600 LOC_Os01g70270 OSJNBa0093F16.35	nucleus [GO:0005634]; DNA binding [GO:0003677]; auxin-activated signaling pathway [GO:0009734]; regulation of transcription, DNA-templated [GO:0006355]	SUBCELLULAR LOCATION: Nucleus {ECO:0000255|PROSITE-ProRule:PRU00326}.	osa:4326957;	PF02309;PF06507;PF02362;
13	LOC_Os12g29520	815.756	0.291624	0.113087	0.00899042	0.0314455	auxin response factor, putative, expressed	Os12g0479400	OsARF24	NA	NA	Q2QQX6	ARFX_ORYSJ	reviewed	Auxin response factor 24	ARF24 Os12g0479400 LOC_Os12g29520	nucleus [GO:0005634]; DNA binding [GO:0003677]; auxin-activated signaling pathway [GO:0009734]; regulation of transcription, DNA-templated [GO:0006355]	SUBCELLULAR LOCATION: Nucleus {ECO:0000255|PROSITE-ProRule:PRU00326}.	osa:4352211;	PF02309;PF06507;PF02362;
11	LOC_Os11g32110	1029.03	-0.399792	0.167757	0.0141054	0.0456546	auxin response factor, putative, expressed	Os11g0523800	OsARF1, arf1, OsARF23, ARF23	NA	NA	B9GAY8	B9GAY8_ORYSJ	unreviewed	Auxin response factor	OsJ_34072	nucleus [GO:0005634]; DNA binding [GO:0003677]; auxin-activated signaling pathway [GO:0009734]; regulation of transcription, DNA-templated [GO:0006355]	SUBCELLULAR LOCATION: Nucleus {ECO:0000256|RuleBase:RU004561, ECO:0000256|SAAS:SAAS01220403}.	osa:4350610;	PF02309;PF06507;PF02362;
12	LOC_Os11g32110	1029.03	-0.399792	0.167757	0.0141054	0.0456546	auxin response factor, putative, expressed	Os11g0523800	OsARF1, arf1, OsARF23, ARF23	NA	NA	F4MGC6	F4MGC6_ORYSJ	unreviewed	Auxin response factor	LOC_Os11g32110	nucleus [GO:0005634]; DNA binding [GO:0003677]; auxin-activated signaling pathway [GO:0009734]; regulation of transcription, DNA-templated [GO:0006355]	SUBCELLULAR LOCATION: Nucleus {ECO:0000256|RuleBase:RU004561, ECO:0000256|SAAS:SAAS01220403}.		PF02309;PF06507;PF02362;
1	LOC_Os01g48060	400.314	-0.401669	0.165493	0.0125001	0.0413603	auxin response factor, putative, expressed	Os01g0670800	OsARF2, ARF2, OsETT2, ETT2, ARF3a, DLN16, OsDLN16	NA	NA	Q0JKI9	ARFB_ORYSJ	reviewed	Auxin response factor 2 (ETTIN-like protein 2) (OsETTIN2)	ARF2 Os01g0670800 LOC_Os01g48060	nucleus [GO:0005634]; DNA binding [GO:0003677]; auxin-activated signaling pathway [GO:0009734]; regulation of transcription, DNA-templated [GO:0006355]	SUBCELLULAR LOCATION: Nucleus {ECO:0000255|PROSITE-ProRule:PRU00326}.	osa:4325895;	PF06507;PF02362;
9	LOC_Os06g46410	630.902	-0.552146	0.172075	0.000852343	0.00422554	auxin response factor, putative, expressed	Os06g0677800	OsARF17	NA	NA	Q653U3	ARFQ_ORYSJ	reviewed	Auxin response factor 17	ARF17 Os06g0677800 LOC_Os06g46410 B1153E06.26 P0710B08.20	nucleus [GO:0005634]; DNA binding [GO:0003677]; auxin-activated signaling pathway [GO:0009734]; regulation of transcription, DNA-templated [GO:0006355]	SUBCELLULAR LOCATION: Nucleus {ECO:0000255|PROSITE-ProRule:PRU00326}.	osa:4341841;	PF02309;PF06507;PF02362;
6	LOC_Os04g57610	354.215	-0.841443	0.31483	0.00318544	0.0131237	auxin response factor, putative, expressed	Os04g0671900	OsARF8, OsARF12, ARF12	NA	NA	Q0J951	ARFL_ORYSJ	reviewed	Auxin response factor 12 (OsARF8)	ARF12 ARF8 Os04g0671900 LOC_Os04g57610 OsJ_16583 OSJNBb0004A17.6	nucleus [GO:0005634]; DNA binding [GO:0003677]; auxin-activated signaling pathway [GO:0009734]; regulation of transcription, DNA-templated [GO:0006355]	SUBCELLULAR LOCATION: Nucleus {ECO:0000255|PROSITE-ProRule:PRU00326}.	osa:4337363;	PF02309;PF06507;PF02362;
2	LOC_Os01g54990	173.642	-1.12372	0.215968	6e-08	8.66e-07	auxin response factor, putative, expressed	Os01g0753500	OsARF3, ETT3, Os ETT3, OsETT3, DLN20, OsDLN20	NA	NA	Q5JMM1	ARFC_ORYSJ	reviewed	Auxin response factor 3	ARF3 Os01g0753500 LOC_Os01g54990 P0435B05.36 P0503C12.8	nucleus [GO:0005634]; DNA binding [GO:0003677]; auxin-activated signaling pathway [GO:0009734]; regulation of transcription, DNA-templated [GO:0006355]	SUBCELLULAR LOCATION: Nucleus {ECO:0000255|PROSITE-ProRule:PRU00326}.	osa:4327014;	PF06507;PF02362;
7	LOC_Os05g48870	724.944	-1.3536	0.178689	8.07e-15	3.84e-13	auxin response factor 15, putative, expressed	Os05g0563400	OsARF15, ARF15, ETT1, OsETT1, ARF3b, OsARF3-1, ARF3-1, OsARF3, ARF3, DLN154, OsDLN154	NA	NA	Q8S985	ARFO_ORYSJ	reviewed	Auxin response factor 15 (ETTIN-like protein 1) (OsETTIN1)	ARF15 Os05g0563400 LOC_Os05g48870 OsJ_018762 OSJNBb0053D02.5	nucleus [GO:0005634]; DNA binding [GO:0003677]; auxin-activated signaling pathway [GO:0009734]; regulation of transcription, DNA-templated [GO:0006355]	SUBCELLULAR LOCATION: Nucleus {ECO:0000255|PROSITE-ProRule:PRU00326}.	osa:9268260;	PF06507;PF02362;
4	LOC_Os02g04810	554.673	-1.48211	0.240804	1.4e-10	3.4e-09	auxin response factor 5, putative, expressed	Os02g0141100	OsARF5	NA	NA	Q6Z2W3	ARFE_ORYSJ	reviewed	Auxin response factor 5	ARF5 Os02g0141100 LOC_Os02g04810 OJ1679_B08.29 OsJ_005181	nucleus [GO:0005634]; DNA binding [GO:0003677]; auxin-activated signaling pathway [GO:0009734]; regulation of transcription, DNA-templated [GO:0006355]	SUBCELLULAR LOCATION: Nucleus {ECO:0000255|PROSITE-ProRule:PRU00326}.	osa:4328265;	PF02309;PF06507;PF02362;
5	LOC_Os02g41800	78.4082	-1.72055	0.401643	2.58e-06	2.58e-05	auxin response factor, putative, expressed	Os02g0628600	OsARF8	NA	NA	Q6K223	ARFH_ORYSJ	reviewed	Auxin response factor 8	ARF8 Os02g0628600 LOC_Os02g41800 B1469H02.12 OsJ_07601	nucleus [GO:0005634]; DNA binding [GO:0003677]; auxin-activated signaling pathway [GO:0009734]; regulation of transcription, DNA-templated [GO:0006355]	SUBCELLULAR LOCATION: Nucleus {ECO:0000255|PROSITE-ProRule:PRU00326}.	osa:4330045;	PF06507;PF02362;

## Sheet: ARF_leaves_mature
Sl No	ARF	baseMean	log2FoldChange	lfcSE	pvalue	padj	MSU_annotation	RAPD	Oryzabase_symbol	Custom.Annot	References	UNIPROT	Uniprot.Entry.name	Status	Protein.names	Gene.names	Gene.ontology..GO.	Subcellular.location..CC.	Cross.reference..KEGG.	Cross.reference..Pfam.
1	LOC_Os06g48950	394.842	1.25249	0.337969	8.65e-05	0.000353534	auxin response factor 19, putative, expressed	Os06g0702600	OsARF7a, OsARF19, ARF19, OsARF7	NA	NA	Q0D9R7	ARFS_ORYSJ	reviewed	Auxin response factor 19 (OsARF7a)	ARF19 ARF7A Os06g0702600 LOC_Os06g48950 OJ1215_E11.1 P0596H10.43	nucleus [GO:0005634]; DNA binding [GO:0003677]; auxin-activated signaling pathway [GO:0009734]; regulation of transcription, DNA-templated [GO:0006355]	SUBCELLULAR LOCATION: Nucleus {ECO:0000255|PROSITE-ProRule:PRU00326}.	osa:4341978;	PF02309;PF06507;PF02362;
2	LOC_Os12g29520	815.756	-0.268839	0.114897	0.0184715	0.0421735	auxin response factor, putative, expressed	Os12g0479400	OsARF24	NA	NA	Q2QQX6	ARFX_ORYSJ	reviewed	Auxin response factor 24	ARF24 Os12g0479400 LOC_Os12g29520	nucleus [GO:0005634]; DNA binding [GO:0003677]; auxin-activated signaling pathway [GO:0009734]; regulation of transcription, DNA-templated [GO:0006355]	SUBCELLULAR LOCATION: Nucleus {ECO:0000255|PROSITE-ProRule:PRU00326}.	osa:4352211;	PF02309;PF06507;PF02362;
3	LOC_Os10g33940	169.148	-0.623555	0.217673	0.0033635	0.00948841	auxin response factor 18, putative, expressed	Os10g0479900	OsARF22	NA	NA	Q9AV47	ARFV_ORYSJ	reviewed	Auxin response factor 22	ARF22 Os10g0479900 LOC_Os10g33940 OSJNBa0093B11.2	nucleus [GO:0005634]; DNA binding [GO:0003677]; auxin-activated signaling pathway [GO:0009734]; regulation of transcription, DNA-templated [GO:0006355]	SUBCELLULAR LOCATION: Nucleus {ECO:0000255|PROSITE-ProRule:PRU00326}.	osa:4348918;	PF06507;PF02362;
4	LOC_Os11g32110	1029.03	-0.987047	0.171095	4.46e-09	3.66e-08	auxin response factor, putative, expressed	Os11g0523800	OsARF1, arf1, OsARF23, ARF23	NA	NA	B9GAY8	B9GAY8_ORYSJ	unreviewed	Auxin response factor	OsJ_34072	nucleus [GO:0005634]; DNA binding [GO:0003677]; auxin-activated signaling pathway [GO:0009734]; regulation of transcription, DNA-templated [GO:0006355]	SUBCELLULAR LOCATION: Nucleus {ECO:0000256|RuleBase:RU004561, ECO:0000256|SAAS:SAAS01220403}.	osa:4350610;	PF02309;PF06507;PF02362;
5	LOC_Os11g32110	1029.03	-0.987047	0.171095	4.46e-09	3.66e-08	auxin response factor, putative, expressed	Os11g0523800	OsARF1, arf1, OsARF23, ARF23	NA	NA	F4MGC6	F4MGC6_ORYSJ	unreviewed	Auxin response factor	LOC_Os11g32110	nucleus [GO:0005634]; DNA binding [GO:0003677]; auxin-activated signaling pathway [GO:0009734]; regulation of transcription, DNA-templated [GO:0006355]	SUBCELLULAR LOCATION: Nucleus {ECO:0000256|RuleBase:RU004561, ECO:0000256|SAAS:SAAS01220403}.		PF02309;PF06507;PF02362;
6	LOC_Os01g13520	88.7265	-1.03369	0.406636	0.00541975	0.0144848	auxin response factor 1, putative, expressed	Os01g0236300	OsARF16, OsARF2, OsARF1	NA	NA	B9EUK4	B9EUK4_ORYSJ	unreviewed	Auxin response factor	OsJ_01030	nucleus [GO:0005634]; DNA binding [GO:0003677]; auxin-activated signaling pathway [GO:0009734]; regulation of transcription, DNA-templated [GO:0006355]	SUBCELLULAR LOCATION: Nucleus {ECO:0000256|RuleBase:RU004561, ECO:0000256|SAAS:SAAS01220403}.		PF02309;PF06507;PF02362;
7	LOC_Os01g13520	88.7265	-1.03369	0.406636	0.00541975	0.0144848	auxin response factor 1, putative, expressed	Os01g0236300	OsARF16, OsARF2, OsARF1	NA	NA	C6F1M3	C6F1M3_ORYSJ	unreviewed	Auxin response factor		nucleus [GO:0005634]; DNA binding [GO:0003677]; auxin-activated signaling pathway [GO:0009734]; regulation of transcription, DNA-templated [GO:0006355]	SUBCELLULAR LOCATION: Nucleus {ECO:0000256|RuleBase:RU004561, ECO:0000256|SAAS:SAAS01220403}.	osa:4327785;	PF02309;PF06507;PF02362;
8	LOC_Os04g43910	48.9093	-1.38475	0.545891	0.00360722	0.0100951	auxin response factor, putative, expressed	Os04g0519700	OsARF10	NA	NA	Q7XKK6	ARFJ_ORYSJ	reviewed	Auxin response factor 10	ARF10 Os04g0519700 LOC_Os04g43910 OsJ_014843 OSJNBa0019D11.3 OSJNBb0061C13.15	nucleus [GO:0005634]; DNA binding [GO:0003677]; auxin-activated signaling pathway [GO:0009734]; regulation of transcription, DNA-templated [GO:0006355]	SUBCELLULAR LOCATION: Nucleus {ECO:0000255|PROSITE-ProRule:PRU00326}.	osa:4336419;	PF06507;PF02362;
9	LOC_Os08g40900	1154.37	-1.42503	0.21944	2.99e-11	3.24e-10	auxin response factor, putative, expressed	Os08g0520500	OsARF7b, OsARF21, DLN216, OsDLN216	NA	NA	Q6YZW0	ARFU_ORYSJ	reviewed	Auxin response factor 21 (OsARF7b)	ARF21 ARF7B Os08g0520500 LOC_Os08g40900 OJ1003_A09.14 P0689E12.38	nucleus [GO:0005634]; DNA binding [GO:0003677]; auxin-activated signaling pathway [GO:0009734]; regulation of transcription, DNA-templated [GO:0006355]	SUBCELLULAR LOCATION: Nucleus {ECO:0000255|PROSITE-ProRule:PRU00326}.	osa:4346065;	PF02309;PF06507;PF02362;
10	LOC_Os08g40900	1154.37	-1.42503	0.21944	2.99e-11	3.24e-10	auxin response factor, putative, expressed	Os08g0520550		NA	NA	Q6YZW0	ARFU_ORYSJ	reviewed	Auxin response factor 21 (OsARF7b)	ARF21 ARF7B Os08g0520500 LOC_Os08g40900 OJ1003_A09.14 P0689E12.38	nucleus [GO:0005634]; DNA binding [GO:0003677]; auxin-activated signaling pathway [GO:0009734]; regulation of transcription, DNA-templated [GO:0006355]	SUBCELLULAR LOCATION: Nucleus {ECO:0000255|PROSITE-ProRule:PRU00326}.	osa:4346065;	PF02309;PF06507;PF02362;
11	LOC_Os02g06910	537.367	-1.44802	0.226071	5.41e-11	5.68e-10	auxin response factor 6, putative, expressed	Os02g0164900	OsARF6a, OsARF6, ARF6	NA	NA	Q6H6V4	ARFF_ORYSJ	reviewed	Auxin response factor 6 (OsARF6a)	ARF6 ARF6A Os02g0164900 LOC_Os02g06910 OJ1661_C12.26 OsJ_005343 OSJNBa0023I17.9	nucleus [GO:0005634]; DNA binding [GO:0003677]; auxin-activated signaling pathway [GO:0009734]; regulation of transcription, DNA-templated [GO:0006355]	SUBCELLULAR LOCATION: Nucleus {ECO:0000255|PROSITE-ProRule:PRU00326}.	osa:4328406;	PF02309;PF06507;PF02362;
12	LOC_Os04g36054	385.432	-1.52311	0.257835	1.1e-09	9.83e-09	auxin response factor 9, putative, expressed	Os04g0442000	OsARF9	NA	NA	Q0JCZ4	ARFI_ORYSJ	reviewed	Auxin response factor 9	ARF9 Os04g0442000 LOC_Os04g36054 OSJNBa0064D20.11	nucleus [GO:0005634]; DNA binding [GO:0003677]; auxin-activated signaling pathway [GO:0009734]; regulation of transcription, DNA-templated [GO:0006355]	SUBCELLULAR LOCATION: Nucleus {ECO:0000255|PROSITE-ProRule:PRU00326}.	osa:4335934;	PF02309;PF06507;PF02362;
13	LOC_Os01g48060	400.314	-1.64441	0.160961	4.47e-25	1.76e-23	auxin response factor, putative, expressed	Os01g0670800	OsARF2, ARF2, OsETT2, ETT2, ARF3a, DLN16, OsDLN16	NA	NA	Q0JKI9	ARFB_ORYSJ	reviewed	Auxin response factor 2 (ETTIN-like protein 2) (OsETTIN2)	ARF2 Os01g0670800 LOC_Os01g48060	nucleus [GO:0005634]; DNA binding [GO:0003677]; auxin-activated signaling pathway [GO:0009734]; regulation of transcription, DNA-templated [GO:0006355]	SUBCELLULAR LOCATION: Nucleus {ECO:0000255|PROSITE-ProRule:PRU00326}.	osa:4325895;	PF06507;PF02362;
14	LOC_Os02g35140	842.551	-1.71796	0.161149	4.9e-27	2.28e-25	auxin response factor 7, putative, expressed	Os02g0557200	OsARF7	NA	NA	Q6YVY0	ARFG_ORYSJ	reviewed	Auxin response factor 7	ARF7 Os02g0557200 LOC_Os02g35140 OsJ_07141 OSJNBb0038F20.6	nucleus [GO:0005634]; DNA binding [GO:0003677]; auxin-activated signaling pathway [GO:0009734]; regulation of transcription, DNA-templated [GO:0006355]	SUBCELLULAR LOCATION: Nucleus {ECO:0000255|PROSITE-ProRule:PRU00326}.	osa:4329672;	PF02309;PF06507;PF02362;
15	LOC_Os01g54990	173.642	-1.73194	0.182474	5.57e-22	1.72e-20	auxin response factor, putative, expressed	Os01g0753500	OsARF3, ETT3, Os ETT3, OsETT3, DLN20, OsDLN20	NA	NA	Q5JMM1	ARFC_ORYSJ	reviewed	Auxin response factor 3	ARF3 Os01g0753500 LOC_Os01g54990 P0435B05.36 P0503C12.8	nucleus [GO:0005634]; DNA binding [GO:0003677]; auxin-activated signaling pathway [GO:0009734]; regulation of transcription, DNA-templated [GO:0006355]	SUBCELLULAR LOCATION: Nucleus {ECO:0000255|PROSITE-ProRule:PRU00326}.	osa:4327014;	PF06507;PF02362;
16	LOC_Os05g48870	724.944	-1.87388	0.178283	1.93e-26	8.57e-25	auxin response factor 15, putative, expressed	Os05g0563400	OsARF15, ARF15, ETT1, OsETT1, ARF3b, OsARF3-1, ARF3-1, OsARF3, ARF3, DLN154, OsDLN154	NA	NA	Q8S985	ARFO_ORYSJ	reviewed	Auxin response factor 15 (ETTIN-like protein 1) (OsETTIN1)	ARF15 Os05g0563400 LOC_Os05g48870 OsJ_018762 OSJNBb0053D02.5	nucleus [GO:0005634]; DNA binding [GO:0003677]; auxin-activated signaling pathway [GO:0009734]; regulation of transcription, DNA-templated [GO:0006355]	SUBCELLULAR LOCATION: Nucleus {ECO:0000255|PROSITE-ProRule:PRU00326}.	osa:9268260;	PF06507;PF02362;
17	LOC_Os06g46410	630.902	-2.66701	0.179714	1.08e-50	2.1e-48	auxin response factor, putative, expressed	Os06g0677800	OsARF17	NA	NA	Q653U3	ARFQ_ORYSJ	reviewed	Auxin response factor 17	ARF17 Os06g0677800 LOC_Os06g46410 B1153E06.26 P0710B08.20	nucleus [GO:0005634]; DNA binding [GO:0003677]; auxin-activated signaling pathway [GO:0009734]; regulation of transcription, DNA-templated [GO:0006355]	SUBCELLULAR LOCATION: Nucleus {ECO:0000255|PROSITE-ProRule:PRU00326}.	osa:4341841;	PF02309;PF06507;PF02362;
18	LOC_Os04g57610	354.215	-3.00173	0.332306	1.48e-20	4.03e-19	auxin response factor, putative, expressed	Os04g0671900	OsARF8, OsARF12, ARF12	NA	NA	Q0J951	ARFL_ORYSJ	reviewed	Auxin response factor 12 (OsARF8)	ARF12 ARF8 Os04g0671900 LOC_Os04g57610 OsJ_16583 OSJNBb0004A17.6	nucleus [GO:0005634]; DNA binding [GO:0003677]; auxin-activated signaling pathway [GO:0009734]; regulation of transcription, DNA-templated [GO:0006355]	SUBCELLULAR LOCATION: Nucleus {ECO:0000255|PROSITE-ProRule:PRU00326}.	osa:4337363;	PF02309;PF06507;PF02362;
19	LOC_Os02g04810	554.673	-3.11683	0.245524	7.38e-38	6.82e-36	auxin response factor 5, putative, expressed	Os02g0141100	OsARF5	NA	NA	Q6Z2W3	ARFE_ORYSJ	reviewed	Auxin response factor 5	ARF5 Os02g0141100 LOC_Os02g04810 OJ1679_B08.29 OsJ_005181	nucleus [GO:0005634]; DNA binding [GO:0003677]; auxin-activated signaling pathway [GO:0009734]; regulation of transcription, DNA-templated [GO:0006355]	SUBCELLULAR LOCATION: Nucleus {ECO:0000255|PROSITE-ProRule:PRU00326}.	osa:4328265;	PF02309;PF06507;PF02362;
20	LOC_Os02g41800	78.4082	-4.2128	0.473586	9.75e-20	2.48e-18	auxin response factor, putative, expressed	Os02g0628600	OsARF8	NA	NA	Q6K223	ARFH_ORYSJ	reviewed	Auxin response factor 8	ARF8 Os02g0628600 LOC_Os02g41800 B1469H02.12 OsJ_07601	nucleus [GO:0005634]; DNA binding [GO:0003677]; auxin-activated signaling pathway [GO:0009734]; regulation of transcription, DNA-templated [GO:0006355]	SUBCELLULAR LOCATION: Nucleus {ECO:0000255|PROSITE-ProRule:PRU00326}.	osa:4330045;	PF06507;PF02362;

## Sheet: bHLH_root
Sl No	bHLH	baseMean	log2FoldChange	lfcSE	pvalue	padj	MSU_annotation	RAPD	Oryzabase_symbol	Custom.Annot	References	UNIPROT	Uniprot.Entry.name	Status	Protein.names	Gene.names	Gene.ontology..GO.	Subcellular.location..CC.	Cross.reference..KEGG.	Cross.reference..Pfam.
1	LOC_Os01g06640	119.126	2.84495	0.258094	2.94e-29	3.88e-27	basic helix-loop-helix, putative, expressed	Os01g0159800	OsbHLH035, bHLH035, OsbHLH35, bHLH35			B7EZ72	B7EZ72_ORYSJ	unreviewed	cDNA clone:002-101-B04, full insert sequence
2	LOC_Os01g06640	119.126	2.84495	0.258094	2.94e-29	3.88e-27	basic helix-loop-helix, putative, expressed	Os01g0159800	OsbHLH035, bHLH035, OsbHLH35, bHLH35			Q7F7Z2	Q7F7Z2_ORYSJ	unreviewed	ESTs C26093(C11622)		nucleus [GO:0005634]; protein dimerization activity [GO:0046983]; regulation of transcription, DNA-templated [GO:0006355]		osa:4324065;	PF00010;
3	LOC_Os10g23050	43.1932	2.83182	0.460088	6.03e-11	1.13e-09	helix-loop-helix DNA-binding protein, putative, expressed	Os10g0376900	OsbHLH045			A0A5S6R7R5	A0A5S6R7R5_ORYSJ	unreviewed	Os10g0376900 protein (Putative helix-loop-helix DNA-binding protein)	Os10g0376900 OsJ_31307 OSJNBa0095C06.11	DNA binding [GO:0003677]; protein dimerization activity [GO:0046983]		osa:4348490;	PF00010;
4	LOC_Os01g09990	78.1491	2.11121	0.350615	1.96e-10	3.4e-09	helix-loop-helix DNA-binding domain containing protein, expressed	Os01g0196300	OsbHLH025, bHLH025, bHLH25			A0A0P0V027	A0A0P0V027_ORYSJ	unreviewed	Basic helix-loop-helix protein-like (Os01g0196300 protein)	Os01g0196300 P0498B01.36	nucleus [GO:0005634]; protein dimerization activity [GO:0046983]; regulation of transcription, DNA-templated [GO:0006355]		osa:4327325;	PF00010;
5	LOC_Os01g51140	18.2579	1.54323	0.528838	0.000611246	0.00313775	helix-loop-helix DNA-binding domain containing protein, expressed	Os01g0707500	OsbHLH118			Q7F4X6	Q7F4X6_ORYSJ	unreviewed	BHLH transcription factor-like (Os01g0707500 protein)	P0510F09.19-1 P0692C11.41-1 Os01g0707500 OsJ_03197	nucleus [GO:0005634]; protein dimerization activity [GO:0046983]; regulation of transcription, DNA-templated [GO:0006355]		osa:4327679;	PF00010;
6	LOC_Os01g11910	767.577	1.47876	0.183623	1.71e-16	6.58e-15	basic helix-loop-helix, putative, expressed	Os01g0218100	OsbHLH037, bHLH037			Q9FTQ1	Q9FTQ1_ORYSJ	unreviewed	Os01g0218100 protein	Os01g0218100 OSNPB_010218100	nucleus [GO:0005634]; protein dimerization activity [GO:0046983]; regulation of transcription, DNA-templated [GO:0006355]		osa:4324583;	PF00010;
7	LOC_Os08g08160	14.1894	1.45354	0.583242	0.00224545	0.00971285	expressed protein	Os08g0179400	OsbHLH070			A3BQ81	A3BQ81_ORYSJ	unreviewed	Os08g0179400 protein	Os08g0179400 OsJ_26257	protein dimerization activity [GO:0046983]
8	LOC_Os03g58330	163.218	1.28974	0.217171	7.74e-10	1.23e-08	BHLH transcription factor, putative, expressed	Os03g0797600	OsbHLH098			Q7Y1H4	Q7Y1H4_ORYSJ	unreviewed	Lipoamide dehydrogenase, putative, expressed (Os03g0797600 protein) (cDNA clone:006-203-H10, full insert sequence)	LOC_Os03g58330 Os03g0797600 OSNPB_030797600	nucleus [GO:0005634]; DNA-binding transcription activator activity, RNA polymerase II-specific [GO:0001228]; protein dimerization activity [GO:0046983]; regulation of transcription, DNA-templated [GO:0006355]		osa:4334429;	PF00010;
9	LOC_Os05g42180	33.9308	1.25213	0.371958	0.000195427	0.00114585	ethylene-responsive protein related, putative, expressed	Os05g0501200	OsbHLH067			Q60EJ4	Q60EJ4_ORYSJ	unreviewed	Os05g0501200 protein	Os05g0501200 OsJ_19096 OSJNBa0017K09.4	nucleus [GO:0005634]; protein dimerization activity [GO:0046983]; regulation of transcription, DNA-templated [GO:0006355]
10	LOC_Os03g55220	54.741	1.24747	0.354206	0.000111163	0.000691982	bHelix-loop-helix transcription factor, putative, expressed	Os03g0759700	OsbHLH066			A0A0P0W3K2	A0A0P0W3K2_ORYSJ	unreviewed	Os03g0759700 protein (Putative ethylene-responsive protein)	Os03g0759700 OsJ_12666 OSJNBb0048A17.16	nucleus [GO:0005634]; DNA binding [GO:0003677]; DNA-binding transcription activator activity, RNA polymerase II-specific [GO:0001228]; protein dimerization activity [GO:0046983]; regulation of transcription, DNA-templated [GO:0006355]		osa:4334181;
11	LOC_Os12g41650	47.648	1.23357	0.414664	0.000732701	0.00366833	helix-loop-helix DNA-binding domain containing protein, expressed	NA	NA			Q2QMB8	Q2QMB8_ORYSJ	unreviewed	Helix-loop-helix DNA-binding domain containing protein, expressed	LOC_Os12g41650	DNA binding [GO:0003677]; protein dimerization activity [GO:0046983]		osa:4352761;	PF00010;
12	LOC_Os12g41650	47.648	1.23357	0.414664	0.000732701	0.00366833	helix-loop-helix DNA-binding domain containing protein, expressed	NA	NA			A0A0P0YCE9	A0A0P0YCE9_ORYSJ	unreviewed	Os12g0610200 protein	Os12g0610200	nucleus [GO:0005634]; DNA binding [GO:0003677]; protein dimerization activity [GO:0046983]			PF00010;
13	LOC_Os09g32510	208.328	1.03482	0.233837	3.5e-06	3.08e-05	BHLH transcription factor, putative, expressed	Os09g0501600	OsbHLH092			Q0J0S0	Q0J0S0_ORYSJ	unreviewed	Os09g0501600 protein (cDNA clone:001-021-C10, full insert sequence)	Os09g0501600 OSNPB_090501600	nucleus [GO:0005634]; DNA-binding transcription factor activity [GO:0003700]; protein dimerization activity [GO:0046983]		osa:4347486;	PF00010;
14	LOC_Os07g05010	31.6882	0.813983	0.383127	0.0151922	0.0483227	helix-loop-helix DNA-binding domain containing protein, expressed	Os07g0143200	OsPIL14, OsbHLH104, OsPIF14, PIF14, OsPIF14alpha, OsPIF14beta			Q8GRJ1	Q8GRJ1_ORYSJ	unreviewed	Transcription factor BHLH9-like protein	OJ1343_B12.103 OJ1351_C05.131	nucleus [GO:0005634]; protein dimerization activity [GO:0046983]; regulation of transcription, DNA-templated [GO:0006355]			PF00010;
15	LOC_Os08g39630	161.436	0.792507	0.224618	0.000215118	0.00124837	helix-loop-helix DNA-binding domain containing protein, expressed	Os08g0506700	OsFBH1, OsbHLH112, DLN213, OsDLN213			A0A0P0XHR8	A0A0P0XHR8_ORYSJ	unreviewed	Os08g0506700 protein (Putative transcription factor RAU1)	Os08g0506700 OsJ_27873 OSJNBa0025J22.40	nucleus [GO:0005634]; DNA-binding transcription activator activity, RNA polymerase II-specific [GO:0001228]; protein dimerization activity [GO:0046983]		osa:4345984;	PF00010;
16	LOC_Os08g39630	161.436	0.792507	0.224618	0.000215118	0.00124837	helix-loop-helix DNA-binding domain containing protein, expressed	Os08g0506850				A0A0P0XHR8	A0A0P0XHR8_ORYSJ	unreviewed	Os08g0506700 protein (Putative transcription factor RAU1)	Os08g0506700 OsJ_27873 OSJNBa0025J22.40	nucleus [GO:0005634]; DNA-binding transcription activator activity, RNA polymerase II-specific [GO:0001228]; protein dimerization activity [GO:0046983]		osa:4345984;	PF00010;
17	LOC_Os04g41229	309.792	0.76191	0.211882	0.00017497	0.00103817	helix-loop-helix DNA-binding domain containing protein, expressed	Os04g0489600	OsbHLH111			A0A0P0WC22	A0A0P0WC22_ORYSJ	unreviewed	Os04g0489600 protein	Os04g0489600	nucleus [GO:0005634]; DNA-binding transcription activator activity, RNA polymerase II-specific [GO:0001228]; protein dimerization activity [GO:0046983]		osa:4336235;	PF00010;
18	LOC_Os01g64560	102.281	0.761122	0.235512	0.000663668	0.00336917	helix-loop-helix DNA-binding protein, putative, expressed	Os01g0865600	OsbHLH149, bHLH149, DLN30, OsDLN30, OsMYC4, MYC4			Q5N9E6	Q5N9E6_ORYSJ	unreviewed	Os01g0865600 protein (cDNA clone:J013129B18, full insert sequence)	Os01g0865600 OSNPB_010865600	nucleus [GO:0005634]; DNA-binding transcription factor activity [GO:0003700]; protein dimerization activity [GO:0046983]; regulation of transcription, DNA-templated [GO:0006355]; root development [GO:0048364]			PF14215;
19	LOC_Os04g53990	54.0274	0.751708	0.306345	0.00737216	0.0265378	ethylene-responsive protein related, putative, expressed	Os04g0631600	OsbHLH068, bHLH068, bHLH68			Q0J9U0	Q0J9U0_ORYSJ	unreviewed	Os04g0631600 protein	Os04g0631600 OSNPB_040631600	nucleus [GO:0005634]; DNA-binding transcription activator activity, RNA polymerase II-specific [GO:0001228]; protein dimerization activity [GO:0046983]		osa:4337107;
20	LOC_Os07g43530	136.81	0.681369	0.250214	0.00383473	0.0153459	helix-loop-helix DNA-binding domain containing protein, expressed	Os07g0628500	OsbHLH1, OsbHLH062			Q69V10	BH062_ORYSJ	reviewed	Transcription factor BHLH062 (Basic helix-loop-helix protein 1) (OsbHLH1) (Basic helix-loop-helix protein 62) (OsbHLH062) (bHLH transcription factor bHLH062)	BHLH062 BHLH1 Os07g0628500 LOC_Os07g43530 OsJ_25221 P0011H09.105 P0506F02.119	nucleus [GO:0005634]; DNA binding [GO:0003677]; protein dimerization activity [GO:0046983]; regulation of transcription, DNA-templated [GO:0006355]	SUBCELLULAR LOCATION: Nucleus {ECO:0000255|PROSITE-ProRule:PRU00981, ECO:0000269|PubMed:25617318}.	osa:4343984;	PF00010;
21	LOC_Os02g39140	231.611	0.667174	0.243155	0.00366977	0.0147708	helix-loop-helix DNA-binding domain containing protein, expressed	Os02g0603600	OsbHLH110			A0A0P0VLP4	A0A0P0VLP4_ORYSJ	unreviewed	Os02g0603600 protein	Os02g0603600 OSNPB_020603600	nucleus [GO:0005634]; DNA-binding transcription activator activity, RNA polymerase II-specific [GO:0001228]
22	LOC_Os02g23823	107.13	0.61719	0.215404	0.00272361	0.0114791	helix-loop-helix DNA-binding domain containing protein, expressed	Os02g0433600	OsbHLH064			Q67U21	Q67U21_ORYSJ	unreviewed	BHLH transcription factor (Os02g0433600 protein) (cDNA clone:001-017-H10, full insert sequence) (cDNA clone:J023031O20, full insert sequence)	Os02g0433600 OSNPB_020433600	nucleus [GO:0005634]; protein dimerization activity [GO:0046983]; regulation of transcription, DNA-templated [GO:0006355]			PF00010;
23	LOC_Os05g38140	520.712	0.579938	0.165684	0.00032345	0.00179648	basic helix-loop-helix DND-binding domain containing protein, expressed	Os05g0455400	OsbHLH058, bHLH058, bHLH58			B9FPY4	B9FPY4_ORYSJ	unreviewed	Uncharacterized protein	OsJ_18778	protein dimerization activity [GO:0046983]
24	LOC_Os11g06010	288.548	0.496043	0.16177	0.00166576	0.00752275	helix-loop-helix DNA-binding protein, putative, expressed	Os11g0158500	OsbHLH151			B9G9H9	B9G9H9_ORYSJ	unreviewed	Uncharacterized protein	OsJ_33044	protein dimerization activity [GO:0046983]		osa:4349836;	PF14215;
25	LOC_Os06g09370	455.486	-0.444547	0.179424	0.0105014	0.0355706	PTF1, putative, expressed	Os06g0193400	OsPTF1, OsbHLH096			Q69Y52	Q69Y52_ORYSJ	unreviewed	Os06g0193400 protein (cDNA clone:J013042L14, full insert sequence)	Os06g0193400 OSNPB_060193400	nucleus [GO:0005634]; DNA-binding transcription activator activity, RNA polymerase II-specific [GO:0001228]; protein dimerization activity [GO:0046983]		osa:4340382;	PF00010;
26	LOC_Os06g09370	455.486	-0.444547	0.179424	0.0105014	0.0355706	PTF1, putative, expressed	Os06g0193400	OsPTF1, OsbHLH096			Q69Y51	Q69Y51_ORYSJ	unreviewed	Putative bHLH transcription factor PTF1	P0698A06.26-2	nucleus [GO:0005634]; protein dimerization activity [GO:0046983]; regulation of transcription, DNA-templated [GO:0006355]			PF00010;
27	LOC_Os01g13460	238.799	-0.540395	0.17383	0.00135743	0.00628636	helix-loop-helix DNA-binding domain containing protein, expressed	Os01g0235700	OsbHLH008, bHLH008, OsMYL2, MYL2, DLN6, OsDLN6, OsMYC1, MYC1			A0A0P0V078	A0A0P0V078_ORYSJ	unreviewed	Os01g0235700 protein	Os01g0235700	protein dimerization activity [GO:0046983]		osa:4327781;	PF14215;PF00010;
28	LOC_Os06g06900	229.488	-0.585728	0.178884	0.000726072	0.00364039	helix-loop-helix DNA-binding domain containing protein, expressed	Os06g0164400	OsbHLH108, OsbHLH108/SPT, bHLH108, SPT			Q5VRS4	Q5VRS4_ORYSJ	unreviewed	Basic helix-loop-helix protein SPATULA-like	OsJ_20240 OSJNBa0015I14.14	nucleus [GO:0005634]; protein dimerization activity [GO:0046983]; regulation of transcription, DNA-templated [GO:0006355]			PF00010;
29	LOC_Os01g67480	252.536	-0.669242	0.213282	0.00102159	0.00490084	helix-loop-helix DNA-binding domain containing protein, expressed	Os01g0900800	OsbHLH109, bHLH109			Q5N8U8	Q5N8U8_ORYSJ	unreviewed	Os01g0900800 protein (cDNA clone:J013149F02, full insert sequence)	Os01g0900800 OSNPB_010900800	cytosol [GO:0005829]; nucleus [GO:0005634]; DNA-binding transcription activator activity, RNA polymerase II-specific [GO:0001228]; protein dimerization activity [GO:0046983]; transcription regulatory region DNA binding [GO:0044212]; regulation of stomatal movement [GO:0010119]		osa:4325038;	PF00010;
30	LOC_Os08g41320	137.806	-0.717469	0.254209	0.00262314	0.0111173	BHLH transcription factor, putative, expressed	Os08g0524800	OsbHLH091, bHLH091			Q84QW1	Q84QW1_ORYSJ	unreviewed	Os08g0524800 protein	Os08g0524800 OSNPB_080524800	nucleus [GO:0005634]; DNA-binding transcription factor activity [GO:0003700]; protein dimerization activity [GO:0046983]; regulation of transcription, DNA-templated [GO:0006355]		osa:4346087;	PF00010;
31	LOC_Os06g16400	54.3421	-0.731884	0.297771	0.00747418	0.0268436	helix-loop-helix DNA-binding domain containing protein, expressed	Os06g0275600	OsbHLH086, TA1			B9FSQ6	B9FSQ6_ORYSJ	unreviewed	BHLH domain-containing protein	OsJ_20959	protein dimerization activity [GO:0046983]; regulation of transcription, DNA-templated [GO:0006355]			PF00010;
32	LOC_Os06g16400	54.3421	-0.731884	0.297771	0.00747418	0.0268436	helix-loop-helix DNA-binding domain containing protein, expressed	Os06g0275600	OsbHLH086, TA1			B7ERJ2	B7ERJ2_ORYSJ	unreviewed	cDNA clone:J033033C13, full insert sequence		regulation of transcription, DNA-templated [GO:0006355]
33	LOC_Os03g08930	61.3376	-0.779847	0.330033	0.0086963	0.0304002	helix-loop-helix DNA-binding protein, putative, expressed	Os03g0188400	OsbHLH044, bHLH044, OsbHLH96, bHLH96, bHLH096			Q8H7N8	Q8H7N8_ORYSJ	unreviewed	BHLH transcription factor (Helix-loop-helix DNA-binding domain containing protein, expressed) (Os03g0188400 protein) (cDNA clone:002-130-B03, full insert sequence)	LOC_Os03g08930 Os03g0188400 OSNPB_030188400	nucleus [GO:0005634]; DNA binding [GO:0003677]; protein dimerization activity [GO:0046983]; regulation of transcription, DNA-templated [GO:0006355]		osa:4331887;	PF00010;
34	LOC_Os08g38080	28.862	-1.04901	0.406575	0.00314886	0.0129593	helix-loop-helix DNA-binding domain containing protein, expressed	Os08g0487700	OsbHLH087			Q6ZCV8	Q6ZCV8_ORYSJ	unreviewed	BHLH transcription factor-like (Os08g0487700 protein)	Os08g0487700 OsJ_27735 P0028A08.20	nucleus [GO:0005634]; protein dimerization activity [GO:0046983]; regulation of transcription, DNA-templated [GO:0006355]		osa:4345892;	PF00010;
35	LOC_Os11g25560	94.2864	-1.10795	0.251757	3.47e-06	3.06e-05	BHLH transcription factor, putative, expressed	Os11g0442500				Q2R5B7	Q2R5B7_ORYSJ	unreviewed	Expressed protein	LOC_Os11g25560	protein dimerization activity [GO:0046983]; regulation of transcription, DNA-templated [GO:0006355]
36	LOC_Os01g50940	21.602	-1.23856	0.47546	0.00216798	0.00945001	helix-loop-helix DNA-binding domain containing protein, expressed	Os01g0705700	OsICE1, ICE1, OsbHLH010, bHLH010, OsMYL1, MYL1, bHLH116, OsMYC3, MYC3			A2ZX10	A2ZX10_ORYSJ	unreviewed	BHLH domain-containing protein	OsJ_03182	protein dimerization activity [GO:0046983]		osa:4327669;	PF14215;PF00010;
37	LOC_Os03g55550	8.96127	-1.37973	0.7406	0.0103374	0.0350946	helix-loop-helix DNA-binding domain containing protein, expressed	NA	NA			Q8W5G3	Q8W5G3_ORYSJ	unreviewed	Helix-loop-helix DNA-binding domain containing protein, expressed	LOC_Os03g55550	nucleus [GO:0005634]; DNA binding [GO:0003677]; protein dimerization activity [GO:0046983]; regulation of transcription, DNA-templated [GO:0006355]			PF00010;
38	LOC_Os09g29830	48.4493	-1.43486	0.32886	2.71e-06	2.44e-05	helix-loop-helix DNA-binding domain containing protein, expressed	Os09g0474100	OsbHLH085, DLN227, OsDLN227			B9G448	B9G448_ORYSJ	unreviewed	BHLH domain-containing protein	OsJ_29731	protein dimerization activity [GO:0046983]; regulation of transcription, DNA-templated [GO:0006355]			PF00010;PF01535;PF13041;
39	LOC_Os10g42430	170.109	-1.43645	0.328963	2.51e-06	2.28e-05	transcription factor MYC7E, putative, expressed	Os10g0575000	OsbHLH009, bHLH009, OsMYC2, MYC2			B9G757	B9G757_ORYSJ	unreviewed	BHLH domain-containing protein	OsJ_32566	protein dimerization activity [GO:0046983]			PF14215;
40	LOC_Os05g04740	12.5706	-1.44004	0.670285	0.00522831	0.0199418	helix-loop-helix DNA-binding domain containing protein, expressed	Os05g0139100	APG, OsPIL16, OsbHLH106			Q6AT90	APG_ORYSJ	reviewed	Transcription factor APG (Basic helix-loop-helix protein 106) (OsbHLH106) (Protein ANTAGONIST OF PGL1) (bHLH transcription factor bHLH106)	APG Os05g0139100 LOC_Os05g04740 OSJNBa0069I13.9 OSJNBb0111O13.2	nucleus [GO:0005634]; protein dimerization activity [GO:0046983]; brassinosteroid mediated signaling pathway [GO:0009742]; regulation of seed growth [GO:0080113]	SUBCELLULAR LOCATION: Nucleus {ECO:0000255|PROSITE-ProRule:PRU00981, ECO:0000269|PubMed:22363621}.	osa:4337752;	PF00010;
41	LOC_Os03g58830	48.1014	-1.4488	0.351187	7.39e-06	6.07e-05	BEE 1, putative, expressed	Os03g0802900	OsbHLH089, bHLH089, bHLH89			Q84T08	BH089_ORYSJ	reviewed	Transcription factor BHLH089 (Basic helix-loop-helix protein 89) (OsbHLH089) (bHLH transcription factor bHLH089)	BHLH089 Os03g0802900 LOC_Os03g58830 OSJNBa0087C10.10	nucleus [GO:0005634]; DNA binding [GO:0003677]; DNA-binding transcription factor activity [GO:0003700]; protein dimerization activity [GO:0046983]; regulation of transcription, DNA-templated [GO:0006355]	SUBCELLULAR LOCATION: Nucleus {ECO:0000255|PROSITE-ProRule:PRU00981}.	osa:4334471;	PF00010;
42	LOC_Os03g26210	122.642	-1.63437	0.325965	8.66e-08	1e-06	helix-loop-helix DNA-binding domain containing protein, expressed	Os03g0379300	OsIRO3, IRO3, OsbHLH063, bHLH063, bHLH63	OsIRO3		Q10KL8	IRO3_ORYSJ	reviewed	Protein IRON-RELATED TRANSCRIPTION FACTOR 3 (OsIRO2) (Basic helix-loop-helix protein 63) (OsbHLH063) (Transcription factor BHLH063) (bHLH transcription factor bHLH063)	IRO3 BHLH063 Os03g0379300 LOC_Os03g26210 OsJ_11051 OSJNBa0013O08.3	nucleus [GO:0005634]; DNA binding [GO:0003677]; protein dimerization activity [GO:0046983]	SUBCELLULAR LOCATION: Nucleus {ECO:0000255|PROSITE-ProRule:PRU00981, ECO:0000269|PubMed:20699001}.	osa:4332972;
43	LOC_Os04g28280	21.1181	-1.6925	0.513582	0.000145554	0.000880598	BEE 3, putative, expressed	Os04g0350700	An-1, OsbHLH093, RAE1, An-1/RAE1, RAE1/An-1			A0A5S6R7E0	A0A5S6R7E0_ORYSJ	unreviewed	OSJNBa0038P21.14 protein (Os04g0350700 protein)	Os04g0350700 OSJNBa0038P21.14	nucleus [GO:0005634]; DNA-binding transcription factor activity [GO:0003700]; protein dimerization activity [GO:0046983]		osa:4335553;	PF00010;
44	LOC_Os12g39850	6.25326	-1.91564	1.05988	0.00710608	0.0257246	helix-loop-helix DNA-binding domain containing protein, expressed	Os12g0589000	OsbHLH130, bHLH130, OsRSL9, RSL9, DLN264, OsDLN264			A3CIY5	A3CIY5_ORYSJ	unreviewed	Uncharacterized protein	OsJ_36693	nucleus [GO:0005634]; DNA binding [GO:0003677]; DNA-binding transcription activator activity, RNA polymerase II-specific [GO:0001228]; protein dimerization activity [GO:0046983]; regulation of transcription, DNA-templated [GO:0006355]		osa:107276154;	PF00010;
45	LOC_Os02g51320	13.4407	-1.93237	0.783959	0.00137429	0.00635715	helix-loop-helix DNA-binding domain containing protein, expressed	Os02g0747900	ILI5, OsILI5, PGL2, OsPGL2, Os170, OsBUL1, BUL1, ILI5/PGL2, OsbHLH170, bHLH170			Q6YUX0	ILI5_ORYSJ	reviewed	Transcription factor ILI5 (OsILI5) (Basic helix-loop-helix protein 170) (OsbHLH170) (Protein INCREASED LEAF INCLINATION 5) (Protein POSITIVE REGULATOR OF GRAIN LENGTH 2) (bHLH transcription factor bHLH170)	ILI5 BHLH170 PGL2 Os02g0747900 LOC_Os02g51320 OsJ_08379 OSJNBa0078N11.24	nucleus [GO:0005634]; protein dimerization activity [GO:0046983]; regulation of seed growth [GO:0080113]	SUBCELLULAR LOCATION: Nucleus {ECO:0000255|PROSITE-ProRule:PRU00981, ECO:0000269|PubMed:23136524}.	osa:4330725;	PF00010;
46	LOC_Os08g38210	304.205	-1.95652	0.225565	5.49e-19	2.81e-17	transcription factor BIM2, putative, expressed	Os08g0490000	OsbHLH031			B9G1I8	B9G1I8_ORYSJ	unreviewed	BHLH domain-containing protein	OsJ_27750	protein dimerization activity [GO:0046983]			PF00010;
47	LOC_Os08g38210	304.205	-1.95652	0.225565	5.49e-19	2.81e-17	transcription factor BIM2, putative, expressed	Os08g0490000	OsbHLH031			A0A0P0XHD5	A0A0P0XHD5_ORYSJ	unreviewed	Os08g0490000 protein (Fragment)	Os08g0490000 OSNPB_080490000	protein dimerization activity [GO:0046983]			PF00010;
48	LOC_Os08g38210	304.205	-1.95652	0.225565	5.49e-19	2.81e-17	transcription factor BIM2, putative, expressed	Os08g0490000	OsbHLH031			Q6ZBQ2	Q6ZBQ2_ORYSJ	unreviewed	BHLH transcription factor (Os08g0490000 protein) (cDNA clone:J023030J22, full insert sequence)	Os08g0490000 OSNPB_080490000	nucleus [GO:0005634]; protein dimerization activity [GO:0046983]; regulation of transcription, DNA-templated [GO:0006355]			PF00010;
49	LOC_Os09g28210	288.832	-1.96891	0.250271	4.51e-16	1.66e-14	bHelix-loop-helix transcription factor, putative, expressed	Os09g0455300	OsbHLH120, bHLH120			A0A0P0XMP7	A0A0P0XMP7_ORYSJ	unreviewed	Basic helix-loop-helix (BHLH)-like protein (Os09g0455300 protein)	Os09g0455300 B1342C04.6 P0025H07.25	nucleus [GO:0005634]; protein dimerization activity [GO:0046983]; regulation of transcription, DNA-templated [GO:0006355]		osa:4347252;	PF00010;
50	LOC_Os03g53020	680.581	-1.97721	0.174158	9.4e-31	1.4e-28	helix-loop-helix DNA-binding domain containing protein, expressed	Os03g0741100	OsbHLH148, bHLH148			Q75KV9	BH148_ORYSJ	reviewed	Transcription factor BHLH148 (Basic helix-loop-helix protein 148) (OsbHLH148) (bHLH transcription factor bHLH148)	BHLH148 Os03g0741100 LOC_Os03g53020 OJ1365_D05.18	nucleus [GO:0005634]; DNA binding [GO:0003677]; protein dimerization activity [GO:0046983]; regulation of transcription, DNA-templated [GO:0006355]; response to water deprivation [GO:0009414]	SUBCELLULAR LOCATION: Nucleus {ECO:0000255|PROSITE-ProRule:PRU00981}.	osa:4334060;	PF00010;
51	LOC_Os01g09930	3.81509	-2.12599	1.4421	0.0131847	0.0430066	helix-loop-helix DNA-binding domain containing protein, expressed	NA	NA			Q5SMX2	Q5SMX2_ORYSJ	unreviewed	Basic helix-loop-helix protein-like	P0498B01.25	nucleus [GO:0005634]; protein dimerization activity [GO:0046983]; regulation of transcription, DNA-templated [GO:0006355]			PF00010;
52	LOC_Os10g39750	13.8795	-2.22635	0.634823	5.64e-05	0.000381722	inducer of CBF expression 2, putative, expressed	Os10g0544200	OsbHLH004			Q336V8	Q336V8_ORYSJ	unreviewed	Helix-loop-helix DNA-binding domain containing protein, expressed (Os10g0544200 protein) (cDNA clone:001-119-D04, full insert sequence)	LOC_Os10g39750 Os10g0544200 OSNPB_100544200	nucleus [GO:0005634]; DNA binding [GO:0003677]; protein dimerization activity [GO:0046983]; regulation of transcription, DNA-templated [GO:0006355]			PF00010;
53	LOC_Os01g38610	3.01307	-2.25993	1.91349	0.0116297	0.0387185	helix-loop-helix DNA-binding domain containing protein, expressed	Os01g0566800	OsbHLH117, bHLH117			Q0JLV0	Q0JLV0_ORYSJ	unreviewed	Os01g0566800 protein (Fragment)	Os01g0566800	protein dimerization activity [GO:0046983]			PF00010;
54	LOC_Os01g38610	3.01307	-2.25993	1.91349	0.0116297	0.0387185	helix-loop-helix DNA-binding domain containing protein, expressed	Os01g0566701				Q0JLV0	Q0JLV0_ORYSJ	unreviewed	Os01g0566800 protein (Fragment)	Os01g0566800	protein dimerization activity [GO:0046983]			PF00010;
55	LOC_Os01g01870	128.931	-2.28745	0.357453	1.56e-11	3.16e-10	helix-loop-helix DNA-binding domain containing protein, expressed	Os01g0108600				Q8W0N9	Q8W0N9_ORYSJ	unreviewed	Os01g0108600 protein (cDNA clone:006-308-A12, full insert sequence)	Os01g0108600 OSNPB_010108600	RNA polymerase II transcription factor complex [GO:0090575]; protein dimerization activity [GO:0046983]; RNA polymerase II regulatory region sequence-specific DNA binding [GO:0000977]; transcription factor binding [GO:0008134]; regulation of transcription by RNA polymerase II [GO:0006357]		osa:4326163;	PF00010;
56	LOC_Os07g39940	58.5515	-2.45475	0.387801	2.42e-11	4.77e-10	helix-loop-helix DNA-binding domain containing protein, expressed	Os07g0588400	OsbHLH128, bHLH128, OsRSL6, RSL6, DLN190, OsDLN190			A0A0P0X817	A0A0P0X817_ORYSJ	unreviewed	Os07g0588400 protein	Os07g0588400 OSNPB_070588400	nucleus [GO:0005634]; DNA-binding transcription activator activity, RNA polymerase II-specific [GO:0001228]; protein dimerization activity [GO:0046983]		osa:107275987;	PF00010;
57	LOC_Os04g31290	72.5222	-2.46221	0.365414	1.62e-12	3.73e-11	helix-loop-helix DNA-binding domain containing protein, expressed	Os04g0381700	OsbHLH156			A0A0N7KIY3	BH156_ORYSJ	reviewed	Transcription factor BHLH156 (Basic helix-loop-helix protein 156) (OsbHLH156) (bHLH transcription factor bHLH156)	BHLH156 Os04g0381700 LOC_Os04g31290 OSJNBa0072D21.7	nucleus [GO:0005634]; DNA binding [GO:0003677]; protein dimerization activity [GO:0046983]	SUBCELLULAR LOCATION: Nucleus {ECO:0000255|PROSITE-ProRule:PRU00981, ECO:0000269|PubMed:31574173}.	osa:107276663;	PF00010;
58	LOC_Os03g04310	139.137	-2.58523	0.266789	3.25e-23	2.51e-21	BHLH transcription factor, putative, expressed	Os03g0135700	OsRAI1, RAI1, OsbHLH003, bHLH003, bHLH3			Q10S44	Q10S44_ORYSJ	unreviewed	Basic helix-loop-helix, putative, expressed (Os03g0135700 protein) (cDNA clone:006-303-F08, full insert sequence)	LOC_Os03g04310 Os03g0135700 OSNPB_030135700	protein dimerization activity [GO:0046983]		osa:4331538;	PF00010;
59	LOC_Os05g07120	17.4152	-2.62434	0.77587	6.03e-05	0.000404565	basic helix-loop-helix, putative, expressed	Os05g0163900	OsbHLH036			Q6F2T4	Q6F2T4_ORYSJ	unreviewed	Os05g0163900 protein	Os05g0163900 OSJNBa0027N19.3 OSJNBb0099P06.13	nucleus [GO:0005634]; protein dimerization activity [GO:0046983]; regulation of transcription, DNA-templated [GO:0006355]		osa:4337905;	PF00010;
60	LOC_Os02g48060	11.9753	-3.02892	0.776327	1.22e-05	9.57e-05	helix-loop-helix DNA-binding domain containing protein, expressed	Os02g0710300	OsbHLH126, bHLH126, OsRSL2, RSL2			A0A0P0VNL7	A0A0P0VNL7_ORYSJ	unreviewed	Os02g0710300 protein	Os02g0710300	nucleus [GO:0005634]; DNA-binding transcription activator activity, RNA polymerase II-specific [GO:0001228]; protein dimerization activity [GO:0046983]		osa:4330488;	PF00010;
61	LOC_Os05g06520	9.26095	-3.0941	0.966661	0.000156544	0.000940775	helix-loop-helix DNA-binding domain containing protein, expressed	NA	NA			A0A0P0WI61	A0A0P0WI61_ORYSJ	unreviewed	Os05g0157400 protein	Os05g0157400 OSNPB_050157400	protein dimerization activity [GO:0046983]		osa:107278227;
62	LOC_Os04g23550	442.289	-3.15068	0.301846	1.18e-26	1.23e-24	basic helix-loop-helix family protein, putative, expressed	Os04g0301500	OsbHLH006, bHLH006, OsbHLH6, bHLH6, RERJ1, OsRERJ1, bHLH35			A0A0P0W8T9	A0A0P0W8T9_ORYSJ	unreviewed	Os04g0301500 protein	Os04g0301500	protein dimerization activity [GO:0046983]		osa:4335417;	PF00010;
63	LOC_Os03g51580	299.934	-3.20899	0.282591	5.6e-31	8.78e-29	helix-loop-helix DNA-binding domain containing protein, expressed	Os03g0725800	OsbHLH018			A0A0P0W350	A0A0P0W350_ORYSJ	unreviewed	Os03g0725800 protein (Putative symbiotic ammonium transport protein) (Putative transcription factor)	OSJNBb0122C16.8 Os03g0725800 OSJNBa0013A09.16	nucleus [GO:0005634]; DNA binding [GO:0003677]; protein dimerization activity [GO:0046983]; regulation of transcription, DNA-templated [GO:0006355]		osa:4333965;	PF00010;
64	LOC_Os01g72370	1710.2	-3.21531	0.189635	1.3e-65	1.67e-62	helix-loop-helix DNA-binding domain containing protein, expressed	Os01g0952800	OsIRO2, IRO2, OsbHLH056, bHLH056, bHLH56, OsbHLH56	OsIRO2		Q0JFZ0	IRO2_ORYSJ	reviewed	Protein IRON-RELATED TRANSCRIPTION FACTOR 2 (OsIRO2) (Basic helix-loop-helix protein 56) (OsbHLH056)	IRO2 BHLH056 LOC_Os01g72370 Os01g0952800 OsJ_04787 P0431G06.13-1	cytoplasm [GO:0005737]; RNA polymerase II transcription factor complex [GO:0090575]; DNA-binding transcription factor activity [GO:0003700]; protein dimerization activity [GO:0046983]; RNA polymerase II regulatory region sequence-specific DNA binding [GO:0000977]; transcription factor binding [GO:0008134]; ethylene-activated signaling pathway [GO:0009873]; positive regulation of siderophore biosy…	SUBCELLULAR LOCATION: Nucleus {ECO:0000255|PROSITE-ProRule:PRU00768, ECO:0000255|PROSITE-ProRule:PRU00981, ECO:0000269|PubMed:31574173}. Cytoplasm {ECO:0000269|PubMed:31574173}. Note=Localized partially to the nucleus under iron deficiency conditions. {ECO:0000269|PubMed:31574173}.	osa:4325750;	PF00010;
65	LOC_Os06g08500	2.39509	-3.30047	3.06958	0.00585312	0.0218824	BHLH transcription factor, putative, expressed	Os06g0184000	OsbHLH115, bHLH115, OsRHL1			Q5SMP1	Q5SMP1_ORYSJ	unreviewed	BHLH transcription factor PTF1-like	P0554A06.9	protein dimerization activity [GO:0046983]		osa:107275733;	PF00010;
66	LOC_Os01g56690	73.5466	-3.78543	0.522942	3.47e-14	9.89e-13	helix-loop-helix DNA-binding domain containing protein, expressed	Os01g0773800	OsbHLH185, bHLH185			Q5ZBY8	Q5ZBY8_ORYSJ	unreviewed	Os01g0773800 protein	Os01g0773800 P0490D09.18	protein dimerization activity [GO:0046983]			PF00010;
67	LOC_Os12g32400	182.478	-3.83779	0.345551	1e-29	1.4e-27	helix-loop-helix DNA-binding domain containing protein, expressed	Os12g0508500	OsbHLH133, bHLH133, OsRSL8, RSL8			Q2QQ32	BH133_ORYSJ	reviewed	Transcription factor BHLH133 (Basic helix-loop-helix protein 133) (OsbHLH133) (bHLH transcription factor bHLH133)	BHLH133 Os12g0508500 LOC_Os12g32400 OsJ_36241	nucleus [GO:0005634]; DNA binding [GO:0003677]; protein dimerization activity [GO:0046983]; regulation of transcription, DNA-templated [GO:0006355]	SUBCELLULAR LOCATION: Nucleus {ECO:0000255|PROSITE-ProRule:PRU00981, ECO:0000269|PubMed:22755510}.		PF00010;
68	LOC_Os01g02110	16.298	-4.14836	0.840279	1.73e-07	1.92e-06	helix-loop-helix DNA-binding domain containing protein, expressed	Os01g0111500	OsbHLH125, bHLH125, OsRSL1, RSL1			A0A0P0UXA7	A0A0P0UXA7_ORYSJ	unreviewed	Os01g0111500 protein	Os01g0111500	nucleus [GO:0005634]; DNA-binding transcription activator activity, RNA polymerase II-specific [GO:0001228]; protein dimerization activity [GO:0046983]		osa:4326144;	PF00010;
69	LOC_Os05g46370	25.4441	-5.79687	1.04685	3.13e-08	3.87e-07	bHelix-loop-helix transcription factor, putative, expressed	Os05g0541400	OsLF, LF, OsbHLH119			A0A0P0WQ90	LF_ORYSJ	reviewed	Transcription factor LATE FLOWERING (OsLF) (Basic helix-loop-helix protein 119) (OsbHLH119)	LF BHLH119 Os05g0541400 LOC_Os05g46370 OJ1362_G11.11	nucleus [GO:0005634]; protein dimerization activity [GO:0046983]; regulation of long-day photoperiodism, flowering [GO:0048586]; regulation of short-day photoperiodism, flowering [GO:0048587]; regulation of transcription, DNA-templated [GO:0006355]	SUBCELLULAR LOCATION: Nucleus {ECO:0000255|PROSITE-ProRule:PRU00981, ECO:0000269|PubMed:21549224}.	osa:9269440;	PF00010;

## Sheet: bHLH_leaves_seedling
Sl No	bHLH	baseMean	log2FoldChange	lfcSE	pvalue	padj	MSU_annotation	RAPD	Oryzabase_symbol	Custom.Annot	References	UNIPROT	Uniprot.Entry.name	Status	Protein.names	Gene.names	Gene.ontology..GO.	Subcellular.location..CC.	Cross.reference..KEGG.	Cross.reference..Pfam.
1	LOC_Os01g56690	5.9504	5.93084	2.72391	0.00012897	0.00080984	helix-loop-helix DNA-binding domain containing protein, expressed	Os01g0773800	OsbHLH185, bHLH185	NA	NA	Q5ZBY8	Q5ZBY8_ORYSJ	unreviewed	Os01g0773800 protein	Os01g0773800 P0490D09.18	protein dimerization activity [GO:0046983]			PF00010;
2	LOC_Os07g43530	93.0651	3.4758	0.561728	5.22e-11	1.37e-09	helix-loop-helix DNA-binding domain containing protein, expressed	Os07g0628500	OsbHLH1, OsbHLH062	NA	NA	Q69V10	BH062_ORYSJ	reviewed	Transcription factor BHLH062 (Basic helix-loop-helix protein 1) (OsbHLH1) (Basic helix-loop-helix protein 62) (OsbHLH062) (bHLH transcription factor bHLH062)	BHLH062 BHLH1 Os07g0628500 LOC_Os07g43530 OsJ_25221 P0011H09.105 P0506F02.119	nucleus [GO:0005634]; DNA binding [GO:0003677]; protein dimerization activity [GO:0046983]; regulation of transcription, DNA-templated [GO:0006355]	SUBCELLULAR LOCATION: Nucleus {ECO:0000255|PROSITE-ProRule:PRU00981, ECO:0000269|PubMed:25617318}.	osa:4343984;	PF00010;
3	LOC_Os04g51070	4.64323	2.76751	1.65515	0.00570182	0.0214747	helix-loop-helix DNA-binding domain containing protein, expressed	Os04g0599300	OsEAT1, OsbHLH141, EAT1/DTD1, bHLH141, DTD1, DTD, DLN120, OsDLN120	NA	NA	Q7X8R0	EAT1_ORYSJ	reviewed	Transcription factor EAT1 (Basic helix-loop-helix protein 141) (OsbHLH141) (Protein DELAYED TAPETUM DEGENERATION) (Protein ETERNAL TAPETUM 1)	EAT1 BHLH141 DTD Os04g0599300 LOC_Os04g51070 OsJ_16023 OSJNBa0083N12.3 OSJNba0093F12.24	nucleus [GO:0005634]; protein dimerization activity [GO:0046983]; anther wall tapetum development [GO:0048658]; pollen development [GO:0009555]; positive regulation of programmed cell death [GO:0043068]; regulation of transcription, DNA-templated [GO:0006355]	SUBCELLULAR LOCATION: Nucleus {ECO:0000255|PROSITE-ProRule:PRU00981, ECO:0000269|PubMed:23385589, ECO:0000269|PubMed:23519457}.	osa:4336865;	PF00010;
4	LOC_Os01g06640	79.1315	2.66499	0.308419	5.31e-19	4.32e-17	basic helix-loop-helix, putative, expressed	Os01g0159800	OsbHLH035, bHLH035, OsbHLH35, bHLH35	NA	NA	Q7F7Z2	Q7F7Z2_ORYSJ	unreviewed	ESTs C26093(C11622)		nucleus [GO:0005634]; protein dimerization activity [GO:0046983]; regulation of transcription, DNA-templated [GO:0006355]		osa:4324065;	PF00010;
5	LOC_Os01g06640	79.1315	2.66499	0.308419	5.31e-19	4.32e-17	basic helix-loop-helix, putative, expressed	Os01g0159800	OsbHLH035, bHLH035, OsbHLH35, bHLH35	NA	NA	B7EZ72	B7EZ72_ORYSJ	unreviewed	cDNA clone:002-101-B04, full insert sequence
6	LOC_Os03g53020	285.721	2.559	0.608508	2.18e-06	2.22e-05	helix-loop-helix DNA-binding domain containing protein, expressed	Os03g0741100	OsbHLH148, bHLH148	NA	NA	Q75KV9	BH148_ORYSJ	reviewed	Transcription factor BHLH148 (Basic helix-loop-helix protein 148) (OsbHLH148) (bHLH transcription factor bHLH148)	BHLH148 Os03g0741100 LOC_Os03g53020 OJ1365_D05.18	nucleus [GO:0005634]; DNA binding [GO:0003677]; protein dimerization activity [GO:0046983]; regulation of transcription, DNA-templated [GO:0006355]; response to water deprivation [GO:0009414]	SUBCELLULAR LOCATION: Nucleus {ECO:0000255|PROSITE-ProRule:PRU00981}.	osa:4334060;	PF00010;
7	LOC_Os05g46370	14.4252	2.44271	0.545455	7.34e-07	8.24e-06	bHelix-loop-helix transcription factor, putative, expressed	Os05g0541400	OsLF, LF, OsbHLH119	NA	NA	A0A0P0WQ90	LF_ORYSJ	reviewed	Transcription factor LATE FLOWERING (OsLF) (Basic helix-loop-helix protein 119) (OsbHLH119)	LF BHLH119 Os05g0541400 LOC_Os05g46370 OJ1362_G11.11	nucleus [GO:0005634]; protein dimerization activity [GO:0046983]; regulation of long-day photoperiodism, flowering [GO:0048586]; regulation of short-day photoperiodism, flowering [GO:0048587]; regulation of transcription, DNA-templated [GO:0006355]	SUBCELLULAR LOCATION: Nucleus {ECO:0000255|PROSITE-ProRule:PRU00981, ECO:0000269|PubMed:21549224}.	osa:9269440;	PF00010;
8	LOC_Os01g11910	109.174	2.30724	0.303331	3.09e-15	1.59e-13	basic helix-loop-helix, putative, expressed	Os01g0218100	OsbHLH037, bHLH037	NA	NA	Q9FTQ1	Q9FTQ1_ORYSJ	unreviewed	Os01g0218100 protein	Os01g0218100 OSNPB_010218100	nucleus [GO:0005634]; protein dimerization activity [GO:0046983]; regulation of transcription, DNA-templated [GO:0006355]		osa:4324583;	PF00010;
9	LOC_Os04g23550	56.5503	2.23871	0.880333	0.000826904	0.00412197	basic helix-loop-helix family protein, putative, expressed	Os04g0301500	OsbHLH006, bHLH006, OsbHLH6, bHLH6, RERJ1, OsRERJ1, bHLH35	NA	NA	A0A0P0W8T9	A0A0P0W8T9_ORYSJ	unreviewed	Os04g0301500 protein	Os04g0301500	protein dimerization activity [GO:0046983]		osa:4335417;	PF00010;
10	LOC_Os11g38870	75.4254	2.05998	0.407478	5.22e-08	7.63e-07	helix-loop-helix DNA-binding domain containing protein, expressed	Os11g0601700	OsbHLH061, OsbHLH61, bHLH061, bHLH61	NA	NA	Q2R1K8	Q2R1K8_ORYSJ	unreviewed	Helix-loop-helix DNA-binding domain containing protein, expressed (Os11g0601700 protein)	LOC_Os11g38870 Os11g0601700 OSNPB_110601700	nucleus [GO:0005634]; DNA binding [GO:0003677]; protein dimerization activity [GO:0046983]; regulation of transcription, DNA-templated [GO:0006355]		osa:4350864;	PF00010;
11	LOC_Os11g38870	75.4254	2.05998	0.407478	5.22e-08	7.63e-07	helix-loop-helix DNA-binding domain containing protein, expressed	Os11g0601650		NA	NA	Q2R1K8	Q2R1K8_ORYSJ	unreviewed	Helix-loop-helix DNA-binding domain containing protein, expressed (Os11g0601700 protein)	LOC_Os11g38870 Os11g0601700 OSNPB_110601700	nucleus [GO:0005634]; DNA binding [GO:0003677]; protein dimerization activity [GO:0046983]; regulation of transcription, DNA-templated [GO:0006355]		osa:4350864;	PF00010;
12	LOC_Os08g38210	131.401	1.18398	0.249737	5.98e-07	6.86e-06	transcription factor BIM2, putative, expressed	Os08g0490000	OsbHLH031	NA	NA	B9G1I8	B9G1I8_ORYSJ	unreviewed	BHLH domain-containing protein	OsJ_27750	protein dimerization activity [GO:0046983]			PF00010;
13	LOC_Os08g38210	131.401	1.18398	0.249737	5.98e-07	6.86e-06	transcription factor BIM2, putative, expressed	Os08g0490000	OsbHLH031	NA	NA	A0A0P0XHD5	A0A0P0XHD5_ORYSJ	unreviewed	Os08g0490000 protein (Fragment)	Os08g0490000 OSNPB_080490000	protein dimerization activity [GO:0046983]			PF00010;
14	LOC_Os08g38210	131.401	1.18398	0.249737	5.98e-07	6.86e-06	transcription factor BIM2, putative, expressed	Os08g0490000	OsbHLH031	NA	NA	Q6ZBQ2	Q6ZBQ2_ORYSJ	unreviewed	BHLH transcription factor (Os08g0490000 protein) (cDNA clone:J023030J22, full insert sequence)	Os08g0490000 OSNPB_080490000	nucleus [GO:0005634]; protein dimerization activity [GO:0046983]; regulation of transcription, DNA-templated [GO:0006355]			PF00010;
15	LOC_Os05g38140	134.106	1.07693	0.236379	1.75e-06	1.82e-05	basic helix-loop-helix DND-binding domain containing protein, expressed	Os05g0455400	OsbHLH058, bHLH058, bHLH58	NA	NA	B9FPY4	B9FPY4_ORYSJ	unreviewed	Uncharacterized protein	OsJ_18778	protein dimerization activity [GO:0046983]
16	LOC_Os02g47660	130.515	0.931166	0.320547	0.00139944	0.00650932	basic helix-loop-helix, putative, expressed	Os02g0705500	OsbHLH079, OsbHLH79, bHLH079, bHLH79, OsBLR1	NA	NA	Q6Z2G7	Q6Z2G7_ORYSJ	unreviewed	Os02g0705500 protein (cDNA clone:001-038-D03, full insert sequence)	Os02g0705500 OSNPB_020705500	nucleus [GO:0005634]; DNA-binding transcription factor activity [GO:0003700]; protein dimerization activity [GO:0046983]; regulation of transcription, DNA-templated [GO:0006355]		osa:4330462;	PF00010;
17	LOC_Os05g01256	47.0506	0.910319	0.348706	0.00347352	0.0141181	helix-loop-helix DNA-binding domain containing protein, expressed	Os05g0103000	OsbHLH083	NA	NA	Q75M33	Q75M33_ORYSJ	unreviewed	BHLH transcription factor (Os05g0103000 protein) (cDNA clone:J013044E05, full insert sequence)	Os05g0103000 OSNPB_050103000	nucleus [GO:0005634]; DNA-binding transcription factor activity [GO:0003700]; protein dimerization activity [GO:0046983]; regulation of transcription, DNA-templated [GO:0006355]		osa:4337537;	PF00010;
18	LOC_Os02g56140	33.5434	0.872418	0.336185	0.00393144	0.0156977	helix-loop-helix DNA-binding domain containing protein, expressed	Os02g0805250	OsbHLH107, bHLH107	NA	NA	A3ACF9	A3ACF9_ORYSJ	unreviewed	BHLH domain-containing protein	OsJ_08778	protein dimerization activity [GO:0046983]			PF00010;
19	LOC_Os02g23823	339.353	0.84183	0.162149	1.01e-07	1.37e-06	helix-loop-helix DNA-binding domain containing protein, expressed	Os02g0433600	OsbHLH064	NA	NA	Q67U21	Q67U21_ORYSJ	unreviewed	BHLH transcription factor (Os02g0433600 protein) (cDNA clone:001-017-H10, full insert sequence) (cDNA clone:J023031O20, full insert sequence)	Os02g0433600 OSNPB_020433600	nucleus [GO:0005634]; protein dimerization activity [GO:0046983]; regulation of transcription, DNA-templated [GO:0006355]			PF00010;
20	LOC_Os01g13460	506.434	0.648637	0.185952	0.000295016	0.00167303	helix-loop-helix DNA-binding domain containing protein, expressed	Os01g0235700	OsbHLH008, bHLH008, OsMYL2, MYL2, DLN6, OsDLN6, OsMYC1, MYC1	NA	NA	A0A0P0V078	A0A0P0V078_ORYSJ	unreviewed	Os01g0235700 protein	Os01g0235700	protein dimerization activity [GO:0046983]		osa:4327781;	PF14215;PF00010;
21	LOC_Os06g09370	556.277	0.617888	0.201808	0.00141458	0.00656932	PTF1, putative, expressed	Os06g0193400	OsPTF1, OsbHLH096	NA	NA	Q69Y51	Q69Y51_ORYSJ	unreviewed	Putative bHLH transcription factor PTF1	P0698A06.26-2	nucleus [GO:0005634]; protein dimerization activity [GO:0046983]; regulation of transcription, DNA-templated [GO:0006355]			PF00010;
22	LOC_Os06g09370	556.277	0.617888	0.201808	0.00141458	0.00656932	PTF1, putative, expressed	Os06g0193400	OsPTF1, OsbHLH096	NA	NA	Q69Y52	Q69Y52_ORYSJ	unreviewed	Os06g0193400 protein (cDNA clone:J013042L14, full insert sequence)	Os06g0193400 OSNPB_060193400	nucleus [GO:0005634]; DNA-binding transcription activator activity, RNA polymerase II-specific [GO:0001228]; protein dimerization activity [GO:0046983]		osa:4340382;	PF00010;
23	LOC_Os09g29930	228.758	0.4527	0.160081	0.00363032	0.0146647	transcription factor BIM2, putative, expressed	Os09g0475400	OsbHLH032	NA	NA	Q69JI7	Q69JI7_ORYSJ	unreviewed	BHLH transcription factor (Os09g0475400 protein)	Os09g0475400 OSNPB_090475400	nucleus [GO:0005634]; protein dimerization activity [GO:0046983]; regulation of transcription, DNA-templated [GO:0006355]		osa:4347359;	PF00010;
24	LOC_Os09g29930	228.758	0.4527	0.160081	0.00363032	0.0146647	transcription factor BIM2, putative, expressed	Os09g0475400	OsbHLH032	NA	NA	B7EJ81	B7EJ81_ORYSJ	unreviewed	cDNA clone:J023084K14, full insert sequence		protein dimerization activity [GO:0046983]			PF00010;
25	LOC_Os07g35870	335.785	0.382363	0.148452	0.00829462	0.029454	basic helix-loop-helix DND-binding domain containing protein, expressed	Os07g0543000	OsbHLH057, bHLH057, OsbHLH57, bHLH57	NA	NA	A0A0N7KNL9	A0A0N7KNL9_ORYSJ	unreviewed	Os07g0543000 protein	Os07g0543000 OSNPB_070543000	protein dimerization activity [GO:0046983]			PF00010;
26	LOC_Os07g35870	335.785	0.382363	0.148452	0.00829462	0.029454	basic helix-loop-helix DND-binding domain containing protein, expressed	Os07g0543000	OsbHLH057, bHLH057, OsbHLH57, bHLH57	NA	NA	Q7XXQ5	Q7XXQ5_ORYSJ	unreviewed	BHLH transcription factor (BHLH-HALZ myc like protein) (Os07g0543000 protein) (cDNA clone:001-007-D03, full insert sequence)	OsMYC1 Os07g0543000 OSNPB_070543000	protein dimerization activity [GO:0046983]		osa:4343509;	PF00010;
27	LOC_Os07g05010	507.943	-0.697324	0.231841	0.00145716	0.00673456	helix-loop-helix DNA-binding domain containing protein, expressed	Os07g0143200	OsPIL14, OsbHLH104, OsPIF14, PIF14, OsPIF14alpha, OsPIF14beta	NA	NA	Q8GRJ1	Q8GRJ1_ORYSJ	unreviewed	Transcription factor BHLH9-like protein	OJ1343_B12.103 OJ1351_C05.131	nucleus [GO:0005634]; protein dimerization activity [GO:0046983]; regulation of transcription, DNA-templated [GO:0006355]			PF00010;
28	LOC_Os02g39140	48.4969	-0.78438	0.283397	0.00267742	0.0113477	helix-loop-helix DNA-binding domain containing protein, expressed	Os02g0603600	OsbHLH110	NA	NA	A0A0P0VLP4	A0A0P0VLP4_ORYSJ	unreviewed	Os02g0603600 protein	Os02g0603600 OSNPB_020603600	nucleus [GO:0005634]; DNA-binding transcription activator activity, RNA polymerase II-specific [GO:0001228]
29	LOC_Os09g31300	226.054	-0.80332	0.351286	0.00974466	0.0336316	helix-loop-helix DNA-binding domain containing protein, expressed	Os09g0487900	OsbHLH143	NA	NA	A0A0P0XP89	A0A0P0XP89_ORYSJ	unreviewed	Os09g0487900 protein	Os09g0487900	nucleus [GO:0005634]; DNA-binding transcription activator activity, RNA polymerase II-specific [GO:0001228]; protein dimerization activity [GO:0046983]		osa:4347431;	PF00010;
30	LOC_Os01g68700	566.519	-0.846337	0.333237	0.00453423	0.0177129	BHLH transcription factor, putative, expressed	Os01g0915600	OsbHLH090	NA	NA	Q0JGM6	Q0JGM6_ORYSJ	unreviewed	Os01g0915600 protein (Putative bHLH transcription factor)	Os01g0915600 P0004D12.24	nucleus [GO:0005634]; DNA-binding transcription factor activity [GO:0003700]; protein dimerization activity [GO:0046983]; regulation of transcription, DNA-templated [GO:0006355]			PF00010;
31	LOC_Os04g23440	52.6924	-0.961305	0.468838	0.0125098	0.0413819	helix-loop-helix DNA-binding domain containing protein, expressed	Os04g0300600	OsbHLH007	NA	NA	Q7XKP5	Q7XKP5_ORYSJ	unreviewed	OSJNBb0013O03.11 protein (Os04g0300600 protein)	Os04g0300600 OSJNBb0013O03.11	nucleus [GO:0005634]; protein dimerization activity [GO:0046983]; regulation of transcription, DNA-templated [GO:0006355]			PF00010;
32	LOC_Os02g55250	28.9933	-0.995023	0.36613	0.00221399	0.00964447	BHLH transcription factor, putative, expressed	Os02g0795800	OsbHLH114	NA	NA	Q6K8Y4	Q6K8Y4_ORYSJ	unreviewed	Basic helix-loop-helix (BHLH)-like	OJ1004_E04.3 OJ1695_H09.18	nucleus [GO:0005634]; protein dimerization activity [GO:0046983]; regulation of transcription, DNA-templated [GO:0006355]			PF00010;
33	LOC_Os10g40740	884.693	-1.25381	0.258906	3.03e-07	3.73e-06	helix-loop-helix DNA-binding domain containing protein, expressed	Os10g0556200	OsbHLH113, bHLH113	NA	NA	A0A0P0XX67	A0A0P0XX67_ORYSJ	unreviewed	Os10g0556200 protein	Os10g0556200 OSNPB_100556200	nucleus [GO:0005634]; protein dimerization activity [GO:0046983]		osa:4349351;	PF00010;
34	LOC_Os03g56950	496.82	-1.28032	0.297402	3.85e-06	3.66e-05	phytochrome-interacting factor 4, putative, expressed	Os03g0782500	OsPIL1, OsPIL13, OsbHLH152, bHLH152, PIF7, OsPIF7, OsPIF4, PIF4	NA	NA	Q10CH5	PIL13_ORYSJ	reviewed	Transcription factor PHYTOCHROME INTERACTING FACTOR-LIKE 13 (OsPIL13) (PIF-like protein 13) (Basic helix-loop-helix protein 152) (OsbHLH152) (OsPIL1)	PIL13 BHLH152 PIL1 Os03g0782500 LOC_Os03g56950	nucleus [GO:0005634]; DNA binding [GO:0003677]; protein dimerization activity [GO:0046983]; internode patterning [GO:0080006]; negative regulation of red or far-red light signaling pathway [GO:0090229]; positive regulation of transcription, DNA-templated [GO:0045893]; regulation of transcription, DNA-templated [GO:0006355]	SUBCELLULAR LOCATION: Nucleus {ECO:0000255|PROSITE-ProRule:PRU00981, ECO:0000269|PubMed:21549224, ECO:0000269|PubMed:22984180}.		PF00010;
35	LOC_Os03g56950	496.82	-1.28032	0.297402	3.85e-06	3.66e-05	phytochrome-interacting factor 4, putative, expressed	Os03g0782500	OsPIL1, OsPIL13, OsbHLH152, bHLH152, PIF7, OsPIF7, OsPIF4, PIF4	NA	NA	Q10CH6	Q10CH6_ORYSJ	unreviewed	Helix-loop-helix DNA-binding domain containing protein, expressed	LOC_Os03g56950	DNA binding [GO:0003677]; protein dimerization activity [GO:0046983]			PF00010;
36	LOC_Os03g04310	22.3431	-1.455	0.637152	0.00407383	0.0161876	BHLH transcription factor, putative, expressed	Os03g0135700	OsRAI1, RAI1, OsbHLH003, bHLH003, bHLH3	NA	NA	Q10S44	Q10S44_ORYSJ	unreviewed	Basic helix-loop-helix, putative, expressed (Os03g0135700 protein) (cDNA clone:006-303-F08, full insert sequence)	LOC_Os03g04310 Os03g0135700 OSNPB_030135700	protein dimerization activity [GO:0046983]		osa:4331538;	PF00010;
37	LOC_Os08g41320	298.379	-1.50521	0.237041	4.04e-11	1.09e-09	BHLH transcription factor, putative, expressed	Os08g0524800	OsbHLH091, bHLH091	NA	NA	Q84QW1	Q84QW1_ORYSJ	unreviewed	Os08g0524800 protein	Os08g0524800 OSNPB_080524800	nucleus [GO:0005634]; DNA-binding transcription factor activity [GO:0003700]; protein dimerization activity [GO:0046983]; regulation of transcription, DNA-templated [GO:0006355]		osa:4346087;	PF00010;
38	LOC_Os01g01870	155.982	-1.64636	0.434288	2.15e-05	0.000167652	helix-loop-helix DNA-binding domain containing protein, expressed	Os01g0108600		NA	NA	Q8W0N9	Q8W0N9_ORYSJ	unreviewed	Os01g0108600 protein (cDNA clone:006-308-A12, full insert sequence)	Os01g0108600 OSNPB_010108600	RNA polymerase II transcription factor complex [GO:0090575]; protein dimerization activity [GO:0046983]; RNA polymerase II regulatory region sequence-specific DNA binding [GO:0000977]; transcription factor binding [GO:0008134]; regulation of transcription by RNA polymerase II [GO:0006357]		osa:4326163;	PF00010;
39	LOC_Os05g04740	30.3833	-1.70377	0.48324	6.03e-05	0.000415688	helix-loop-helix DNA-binding domain containing protein, expressed	Os05g0139100	APG, OsPIL16, OsbHLH106	NA	NA	Q6AT90	APG_ORYSJ	reviewed	Transcription factor APG (Basic helix-loop-helix protein 106) (OsbHLH106) (Protein ANTAGONIST OF PGL1) (bHLH transcription factor bHLH106)	APG Os05g0139100 LOC_Os05g04740 OSJNBa0069I13.9 OSJNBb0111O13.2	nucleus [GO:0005634]; protein dimerization activity [GO:0046983]; brassinosteroid mediated signaling pathway [GO:0009742]; regulation of seed growth [GO:0080113]	SUBCELLULAR LOCATION: Nucleus {ECO:0000255|PROSITE-ProRule:PRU00981, ECO:0000269|PubMed:22363621}.	osa:4337752;	PF00010;
40	LOC_Os01g09930	12.3088	-1.71601	0.712411	0.00200772	0.00889481	helix-loop-helix DNA-binding domain containing protein, expressed	NA	NA	NA	NA	Q5SMX2	Q5SMX2_ORYSJ	unreviewed	Basic helix-loop-helix protein-like	P0498B01.25	nucleus [GO:0005634]; protein dimerization activity [GO:0046983]; regulation of transcription, DNA-templated [GO:0006355]			PF00010;
41	LOC_Os10g23050	14.5211	-2.07041	0.606357	6.49e-05	0.000443348	helix-loop-helix DNA-binding protein, putative, expressed	Os10g0376900	OsbHLH045	NA	NA	A0A5S6R7R5	A0A5S6R7R5_ORYSJ	unreviewed	Os10g0376900 protein (Putative helix-loop-helix DNA-binding protein)	Os10g0376900 OsJ_31307 OSJNBa0095C06.11	DNA binding [GO:0003677]; protein dimerization activity [GO:0046983]		osa:4348490;	PF00010;
42	LOC_Os11g25560	237.02	-2.2091	0.632002	3.92e-05	0.000286016	BHLH transcription factor, putative, expressed	Os11g0442500		NA	NA	Q2R5B7	Q2R5B7_ORYSJ	unreviewed	Expressed protein	LOC_Os11g25560	protein dimerization activity [GO:0046983]; regulation of transcription, DNA-templated [GO:0006355]
43	LOC_Os03g26210	141.371	-2.72487	0.350496	6.57e-16	3.71e-14	helix-loop-helix DNA-binding domain containing protein, expressed	Os03g0379300	OsIRO3, IRO3, OsbHLH063, bHLH063, bHLH63	NA	NA	Q10KL8	IRO3_ORYSJ	reviewed	Protein IRON-RELATED TRANSCRIPTION FACTOR 3 (OsIRO2) (Basic helix-loop-helix protein 63) (OsbHLH063) (Transcription factor BHLH063) (bHLH transcription factor bHLH063)	IRO3 BHLH063 Os03g0379300 LOC_Os03g26210 OsJ_11051 OSJNBa0013O08.3	nucleus [GO:0005634]; DNA binding [GO:0003677]; protein dimerization activity [GO:0046983]	SUBCELLULAR LOCATION: Nucleus {ECO:0000255|PROSITE-ProRule:PRU00981, ECO:0000269|PubMed:20699001}.	osa:4332972;
44	LOC_Os01g38610	197.38	-3.10925	0.565072	2.63e-09	5.05e-08	helix-loop-helix DNA-binding domain containing protein, expressed	Os01g0566800	OsbHLH117, bHLH117	NA	NA	Q0JLV0	Q0JLV0_ORYSJ	unreviewed	Os01g0566800 protein (Fragment)	Os01g0566800	protein dimerization activity [GO:0046983]			PF00010;
45	LOC_Os01g38610	197.38	-3.10925	0.565072	2.63e-09	5.05e-08	helix-loop-helix DNA-binding domain containing protein, expressed	Os01g0566701		NA	NA	Q0JLV0	Q0JLV0_ORYSJ	unreviewed	Os01g0566800 protein (Fragment)	Os01g0566800	protein dimerization activity [GO:0046983]			PF00010;
46	LOC_Os04g31290	4.70984	-3.59337	1.27378	0.000363213	0.00200232	helix-loop-helix DNA-binding domain containing protein, expressed	Os04g0381700	OsbHLH156	NA	NA	A0A0N7KIY3	BH156_ORYSJ	reviewed	Transcription factor BHLH156 (Basic helix-loop-helix protein 156) (OsbHLH156) (bHLH transcription factor bHLH156)	BHLH156 Os04g0381700 LOC_Os04g31290 OSJNBa0072D21.7	nucleus [GO:0005634]; DNA binding [GO:0003677]; protein dimerization activity [GO:0046983]	SUBCELLULAR LOCATION: Nucleus {ECO:0000255|PROSITE-ProRule:PRU00981, ECO:0000269|PubMed:31574173}.	osa:107276663;	PF00010;
47	LOC_Os01g01840	8.73669	-5.72754	1.47616	4.4e-06	4.14e-05	helix-loop-helix DNA-binding domain containing protein, expressed	Os01g0108500		NA	NA	Q0JRC6	Q0JRC6_ORYSJ	unreviewed	Os01g0108400 protein	Os01g0108400	DNA binding [GO:0003677]; protein dimerization activity [GO:0046983]; regulation of transcription by RNA polymerase II [GO:0006357]			PF00010;
48	LOC_Os01g01840	8.73669	-5.72754	1.47616	4.4e-06	4.14e-05	helix-loop-helix DNA-binding domain containing protein, expressed	Os01g0108400	OsbHLH187, bHLH187	NA	NA	Q0JRC6	Q0JRC6_ORYSJ	unreviewed	Os01g0108400 protein	Os01g0108400	DNA binding [GO:0003677]; protein dimerization activity [GO:0046983]; regulation of transcription by RNA polymerase II [GO:0006357]			PF00010;
49	LOC_Os12g32400	3.50574	-6.17712	2.75341	5.12e-05	0.000361196	helix-loop-helix DNA-binding domain containing protein, expressed	Os12g0508500	OsbHLH133, bHLH133, OsRSL8, RSL8	NA	NA	Q2QQ32	BH133_ORYSJ	reviewed	Transcription factor BHLH133 (Basic helix-loop-helix protein 133) (OsbHLH133) (bHLH transcription factor bHLH133)	BHLH133 Os12g0508500 LOC_Os12g32400 OsJ_36241	nucleus [GO:0005634]; DNA binding [GO:0003677]; protein dimerization activity [GO:0046983]; regulation of transcription, DNA-templated [GO:0006355]	SUBCELLULAR LOCATION: Nucleus {ECO:0000255|PROSITE-ProRule:PRU00981, ECO:0000269|PubMed:22755510}.		PF00010;
50	LOC_Os01g72370	2865.3	-6.23964	0.411181	2.97e-53	7.09e-50	helix-loop-helix DNA-binding domain containing protein, expressed	Os01g0952800	OsIRO2, IRO2, OsbHLH056, bHLH056, bHLH56, OsbHLH56	NA	NA	Q0JFZ0	IRO2_ORYSJ	reviewed	Protein IRON-RELATED TRANSCRIPTION FACTOR 2 (OsIRO2) (Basic helix-loop-helix protein 56) (OsbHLH056)	IRO2 BHLH056 LOC_Os01g72370 Os01g0952800 OsJ_04787 P0431G06.13-1	cytoplasm [GO:0005737]; RNA polymerase II transcription factor complex [GO:0090575]; DNA-binding transcription factor activity [GO:0003700]; protein dimerization activity [GO:0046983]; RNA polymerase II regulatory region sequence-specific DNA binding [GO:0000977]; transcription factor binding [GO:0008134]; ethylene-activated signaling pathway [GO:0009873]; positive regulation of siderophore biosy…	SUBCELLULAR LOCATION: Nucleus {ECO:0000255|PROSITE-ProRule:PRU00768, ECO:0000255|PROSITE-ProRule:PRU00981, ECO:0000269|PubMed:31574173}. Cytoplasm {ECO:0000269|PubMed:31574173}. Note=Localized partially to the nucleus under iron deficiency conditions. {ECO:0000269|PubMed:31574173}.	osa:4325750;	PF00010;

## Sheet: bHLH_leaves_mature
Sl No	bHLH	baseMean	log2FoldChange	lfcSE	pvalue	padj	MSU_annotation	RAPD	Oryzabase_symbol	Custom.Annot	References	UNIPROT	Uniprot.Entry.name	Status	Protein.names	Gene.names	Gene.ontology..GO.	Subcellular.location..CC.	Cross.reference..KEGG.	Cross.reference..Pfam.
1	LOC_Os04g23550	56.5503	6.30595	1.02664	9.73e-11	9.89e-10	basic helix-loop-helix family protein, putative, expressed	Os04g0301500	OsbHLH006, bHLH006, OsbHLH6, bHLH6, RERJ1, OsRERJ1, bHLH35	NA	NA	A0A0P0W8T9	A0A0P0W8T9_ORYSJ	unreviewed	Os04g0301500 protein	Os04g0301500	protein dimerization activity [GO:0046983]		osa:4335417;	PF00010;
2	LOC_Os01g56690	5.9504	5.37078	2.71743	0.000442659	0.0015492	helix-loop-helix DNA-binding domain containing protein, expressed	Os01g0773800	OsbHLH185, bHLH185	NA	NA	Q5ZBY8	Q5ZBY8_ORYSJ	unreviewed	Os01g0773800 protein	Os01g0773800 P0490D09.18	protein dimerization activity [GO:0046983]			PF00010;
3	LOC_Os03g53020	285.721	4.63397	0.631407	9.77e-15	1.58e-13	helix-loop-helix DNA-binding domain containing protein, expressed	Os03g0741100	OsbHLH148, bHLH148	NA	NA	Q75KV9	BH148_ORYSJ	reviewed	Transcription factor BHLH148 (Basic helix-loop-helix protein 148) (OsbHLH148) (bHLH transcription factor bHLH148)	BHLH148 Os03g0741100 LOC_Os03g53020 OJ1365_D05.18	nucleus [GO:0005634]; DNA binding [GO:0003677]; protein dimerization activity [GO:0046983]; regulation of transcription, DNA-templated [GO:0006355]; response to water deprivation [GO:0009414]	SUBCELLULAR LOCATION: Nucleus {ECO:0000255|PROSITE-ProRule:PRU00981}.	osa:4334060;	PF00010;
4	LOC_Os03g51910	18.3209	4.50702	0.794272	3.3e-09	2.75e-08	basic helix-loop-helix protein, putative, expressed	Os03g0728900	OsbHLH084	NA	NA	Q0DNX4	Q0DNX4_ORYSJ	unreviewed	Os03g0728900 protein (Putative Helix-loop-helix DNA-binding domain containing protein)	Os03g0728900 OsJ_12437 OSJNBb0011H13.2	nucleus [GO:0005634]; DNA binding [GO:0003677]; protein dimerization activity [GO:0046983]; regulation of transcription, DNA-templated [GO:0006355]		osa:4333984;	PF00010;
5	LOC_Os01g11910	109.174	3.1279	0.357008	3.16e-19	7.75e-18	basic helix-loop-helix, putative, expressed	Os01g0218100	OsbHLH037, bHLH037	NA	NA	Q9FTQ1	Q9FTQ1_ORYSJ	unreviewed	Os01g0218100 protein	Os01g0218100 OSNPB_010218100	nucleus [GO:0005634]; protein dimerization activity [GO:0046983]; regulation of transcription, DNA-templated [GO:0006355]		osa:4324583;	PF00010;
6	LOC_Os09g31300	226.054	2.86895	0.377579	3.66e-15	6.17e-14	helix-loop-helix DNA-binding domain containing protein, expressed	Os09g0487900	OsbHLH143	NA	NA	A0A0P0XP89	A0A0P0XP89_ORYSJ	unreviewed	Os09g0487900 protein	Os09g0487900	nucleus [GO:0005634]; DNA-binding transcription activator activity, RNA polymerase II-specific [GO:0001228]; protein dimerization activity [GO:0046983]		osa:4347431;	PF00010;
7	LOC_Os08g39630	757.546	2.29566	0.329755	5.32e-13	7.04e-12	helix-loop-helix DNA-binding domain containing protein, expressed	Os08g0506850		NA	NA	A0A0P0XHR8	A0A0P0XHR8_ORYSJ	unreviewed	Os08g0506700 protein (Putative transcription factor RAU1)	Os08g0506700 OsJ_27873 OSJNBa0025J22.40	nucleus [GO:0005634]; DNA-binding transcription activator activity, RNA polymerase II-specific [GO:0001228]; protein dimerization activity [GO:0046983]		osa:4345984;	PF00010;
8	LOC_Os08g39630	757.546	2.29566	0.329755	5.32e-13	7.04e-12	helix-loop-helix DNA-binding domain containing protein, expressed	Os08g0506700	OsFBH1, OsbHLH112, DLN213, OsDLN213	NA	NA	A0A0P0XHR8	A0A0P0XHR8_ORYSJ	unreviewed	Os08g0506700 protein (Putative transcription factor RAU1)	Os08g0506700 OsJ_27873 OSJNBa0025J22.40	nucleus [GO:0005634]; DNA-binding transcription activator activity, RNA polymerase II-specific [GO:0001228]; protein dimerization activity [GO:0046983]		osa:4345984;	PF00010;
9	LOC_Os05g38140	134.106	2.03524	0.257878	6.77e-16	1.23e-14	basic helix-loop-helix DND-binding domain containing protein, expressed	Os05g0455400	OsbHLH058, bHLH058, bHLH58	NA	NA	B9FPY4	B9FPY4_ORYSJ	unreviewed	Uncharacterized protein	OsJ_18778	protein dimerization activity [GO:0046983]
10	LOC_Os01g06640	79.1315	1.94183	0.387396	1.6e-07	1.04e-06	basic helix-loop-helix, putative, expressed	Os01g0159800	OsbHLH035, bHLH035, OsbHLH35, bHLH35	NA	NA	Q7F7Z2	Q7F7Z2_ORYSJ	unreviewed	ESTs C26093(C11622)		nucleus [GO:0005634]; protein dimerization activity [GO:0046983]; regulation of transcription, DNA-templated [GO:0006355]		osa:4324065;	PF00010;
11	LOC_Os01g06640	79.1315	1.94183	0.387396	1.6e-07	1.04e-06	basic helix-loop-helix, putative, expressed	Os01g0159800	OsbHLH035, bHLH035, OsbHLH35, bHLH35	NA	NA	B7EZ72	B7EZ72_ORYSJ	unreviewed	cDNA clone:002-101-B04, full insert sequence
12	LOC_Os02g49480	55.8779	1.78375	0.389184	1.25e-06	7.05e-06	helix-loop-helix DNA-binding domain containing protein, expressed	Os02g0726700	OsbHLH034	NA	NA	B9F2H5	B9F2H5_ORYSJ	unreviewed	BHLH domain-containing protein	OsJ_08226	protein dimerization activity [GO:0046983]		osa:4330593;	PF00010;
13	LOC_Os05g42180	36.3579	1.60015	0.499236	0.000377997	0.00134332	ethylene-responsive protein related, putative, expressed	Os05g0501200	OsbHLH067	NA	NA	Q60EJ4	Q60EJ4_ORYSJ	unreviewed	Os05g0501200 protein	Os05g0501200 OsJ_19096 OSJNBa0017K09.4	nucleus [GO:0005634]; protein dimerization activity [GO:0046983]; regulation of transcription, DNA-templated [GO:0006355]
14	LOC_Os07g43530	93.0651	1.51116	0.462154	0.000329907	0.00118899	helix-loop-helix DNA-binding domain containing protein, expressed	Os07g0628500	OsbHLH1, OsbHLH062	NA	NA	Q69V10	BH062_ORYSJ	reviewed	Transcription factor BHLH062 (Basic helix-loop-helix protein 1) (OsbHLH1) (Basic helix-loop-helix protein 62) (OsbHLH062) (bHLH transcription factor bHLH062)	BHLH062 BHLH1 Os07g0628500 LOC_Os07g43530 OsJ_25221 P0011H09.105 P0506F02.119	nucleus [GO:0005634]; DNA binding [GO:0003677]; protein dimerization activity [GO:0046983]; regulation of transcription, DNA-templated [GO:0006355]	SUBCELLULAR LOCATION: Nucleus {ECO:0000255|PROSITE-ProRule:PRU00981, ECO:0000269|PubMed:25617318}.	osa:4343984;	PF00010;
15	LOC_Os01g39330	25.8396	1.4271	0.740802	0.0150137	0.0352398	helix-loop-helix DNA-binding domain containing protein, expressed	Os01g0575200	OsbHLH024	NA	NA	Q8S0C6	Q8S0C6_ORYSJ	unreviewed	Os01g0575200 protein (cDNA clone:002-101-F10, full insert sequence)	Os01g0575200 OSNPB_010575200	nucleus [GO:0005634]; protein dimerization activity [GO:0046983]; regulation of transcription, DNA-templated [GO:0006355]		osa:4326315;	PF00010;
16	LOC_Os12g41650	182.865	1.23056	0.482604	0.00423079	0.0116181	helix-loop-helix DNA-binding domain containing protein, expressed	NA	NA	NA	NA	A0A0P0YCE9	A0A0P0YCE9_ORYSJ	unreviewed	Os12g0610200 protein	Os12g0610200	nucleus [GO:0005634]; DNA binding [GO:0003677]; protein dimerization activity [GO:0046983]			PF00010;
17	LOC_Os12g41650	182.865	1.23056	0.482604	0.00423079	0.0116181	helix-loop-helix DNA-binding domain containing protein, expressed	NA	NA	NA	NA	Q2QMB8	Q2QMB8_ORYSJ	unreviewed	Helix-loop-helix DNA-binding domain containing protein, expressed	LOC_Os12g41650	DNA binding [GO:0003677]; protein dimerization activity [GO:0046983]		osa:4352761;	PF00010;
18	LOC_Os10g40740	884.693	1.21378	0.327366	8.69e-05	0.000354656	helix-loop-helix DNA-binding domain containing protein, expressed	Os10g0556200	OsbHLH113, bHLH113	NA	NA	A0A0P0XX67	A0A0P0XX67_ORYSJ	unreviewed	Os10g0556200 protein	Os10g0556200 OSNPB_100556200	nucleus [GO:0005634]; protein dimerization activity [GO:0046983]		osa:4349351;	PF00010;
19	LOC_Os04g53990	62.9755	1.19265	0.290522	1.91e-05	8.77e-05	ethylene-responsive protein related, putative, expressed	Os04g0631600	OsbHLH068, bHLH068, bHLH68	NA	NA	Q0J9U0	Q0J9U0_ORYSJ	unreviewed	Os04g0631600 protein	Os04g0631600 OSNPB_040631600	nucleus [GO:0005634]; DNA-binding transcription activator activity, RNA polymerase II-specific [GO:0001228]; protein dimerization activity [GO:0046983]		osa:4337107;
20	LOC_Os02g23823	339.353	1.15162	0.164689	1.41e-12	1.78e-11	helix-loop-helix DNA-binding domain containing protein, expressed	Os02g0433600	OsbHLH064	NA	NA	Q67U21	Q67U21_ORYSJ	unreviewed	BHLH transcription factor (Os02g0433600 protein) (cDNA clone:001-017-H10, full insert sequence) (cDNA clone:J023031O20, full insert sequence)	Os02g0433600 OSNPB_020433600	nucleus [GO:0005634]; protein dimerization activity [GO:0046983]; regulation of transcription, DNA-templated [GO:0006355]			PF00010;
21	LOC_Os09g29830	43.6404	1.07086	0.305882	0.000242274	0.000898334	helix-loop-helix DNA-binding domain containing protein, expressed	Os09g0474100	OsbHLH085, DLN227, OsDLN227	NA	NA	B9G448	B9G448_ORYSJ	unreviewed	BHLH domain-containing protein	OsJ_29731	protein dimerization activity [GO:0046983]; regulation of transcription, DNA-templated [GO:0006355]			PF00010;PF01535;PF13041;
22	LOC_Os01g01870	155.982	0.959713	0.411246	0.0107932	0.0264989	helix-loop-helix DNA-binding domain containing protein, expressed	Os01g0108600		NA	NA	Q8W0N9	Q8W0N9_ORYSJ	unreviewed	Os01g0108600 protein (cDNA clone:006-308-A12, full insert sequence)	Os01g0108600 OSNPB_010108600	RNA polymerase II transcription factor complex [GO:0090575]; protein dimerization activity [GO:0046983]; RNA polymerase II regulatory region sequence-specific DNA binding [GO:0000977]; transcription factor binding [GO:0008134]; regulation of transcription by RNA polymerase II [GO:0006357]		osa:4326163;	PF00010;
23	LOC_Os11g38870	75.4254	0.907897	0.355206	0.00637462	0.0166622	helix-loop-helix DNA-binding domain containing protein, expressed	Os11g0601700	OsbHLH061, OsbHLH61, bHLH061, bHLH61	NA	NA	Q2R1K8	Q2R1K8_ORYSJ	unreviewed	Helix-loop-helix DNA-binding domain containing protein, expressed (Os11g0601700 protein)	LOC_Os11g38870 Os11g0601700 OSNPB_110601700	nucleus [GO:0005634]; DNA binding [GO:0003677]; protein dimerization activity [GO:0046983]; regulation of transcription, DNA-templated [GO:0006355]		osa:4350864;	PF00010;
24	LOC_Os11g38870	75.4254	0.907897	0.355206	0.00637462	0.0166622	helix-loop-helix DNA-binding domain containing protein, expressed	Os11g0601650		NA	NA	Q2R1K8	Q2R1K8_ORYSJ	unreviewed	Helix-loop-helix DNA-binding domain containing protein, expressed (Os11g0601700 protein)	LOC_Os11g38870 Os11g0601700 OSNPB_110601700	nucleus [GO:0005634]; DNA binding [GO:0003677]; protein dimerization activity [GO:0046983]; regulation of transcription, DNA-templated [GO:0006355]		osa:4350864;	PF00010;
25	LOC_Os06g09370	556.277	0.888769	0.204536	9.16e-06	4.47e-05	PTF1, putative, expressed	Os06g0193400	OsPTF1, OsbHLH096	NA	NA	Q69Y51	Q69Y51_ORYSJ	unreviewed	Putative bHLH transcription factor PTF1	P0698A06.26-2	nucleus [GO:0005634]; protein dimerization activity [GO:0046983]; regulation of transcription, DNA-templated [GO:0006355]			PF00010;
26	LOC_Os06g09370	556.277	0.888769	0.204536	9.16e-06	4.47e-05	PTF1, putative, expressed	Os06g0193400	OsPTF1, OsbHLH096	NA	NA	Q69Y52	Q69Y52_ORYSJ	unreviewed	Os06g0193400 protein (cDNA clone:J013042L14, full insert sequence)	Os06g0193400 OSNPB_060193400	nucleus [GO:0005634]; DNA-binding transcription activator activity, RNA polymerase II-specific [GO:0001228]; protein dimerization activity [GO:0046983]		osa:4340382;	PF00010;
27	LOC_Os06g06900	55.0787	0.836749	0.373915	0.0161458	0.0375298	helix-loop-helix DNA-binding domain containing protein, expressed	Os06g0164400	OsbHLH108, OsbHLH108/SPT, bHLH108, SPT	NA	NA	Q5VRS4	Q5VRS4_ORYSJ	unreviewed	Basic helix-loop-helix protein SPATULA-like	OsJ_20240 OSJNBa0015I14.14	nucleus [GO:0005634]; protein dimerization activity [GO:0046983]; regulation of transcription, DNA-templated [GO:0006355]			PF00010;
28	LOC_Os01g64560	440.662	0.748106	0.148785	3.67e-07	2.26e-06	helix-loop-helix DNA-binding protein, putative, expressed	Os01g0865600	OsbHLH149, bHLH149, DLN30, OsDLN30, OsMYC4, MYC4	NA	NA	Q5N9E6	Q5N9E6_ORYSJ	unreviewed	Os01g0865600 protein (cDNA clone:J013129B18, full insert sequence)	Os01g0865600 OSNPB_010865600	nucleus [GO:0005634]; DNA-binding transcription factor activity [GO:0003700]; protein dimerization activity [GO:0046983]; regulation of transcription, DNA-templated [GO:0006355]; root development [GO:0048364]			PF14215;
29	LOC_Os01g67480	390.25	0.694044	0.295121	0.0139069	0.0330384	helix-loop-helix DNA-binding domain containing protein, expressed	Os01g0900800	OsbHLH109, bHLH109	NA	NA	Q5N8U8	Q5N8U8_ORYSJ	unreviewed	Os01g0900800 protein (cDNA clone:J013149F02, full insert sequence)	Os01g0900800 OSNPB_010900800	cytosol [GO:0005829]; nucleus [GO:0005634]; DNA-binding transcription activator activity, RNA polymerase II-specific [GO:0001228]; protein dimerization activity [GO:0046983]; transcription regulatory region DNA binding [GO:0044212]; regulation of stomatal movement [GO:0010119]		osa:4325038;	PF00010;
30	LOC_Os03g12940	350.469	0.555869	0.150808	0.000191871	0.000726347	OsFBO13 - F-box and other domain containing protein, expressed	Os03g0231950	OsbHLH088	NA	NA	Q10PJ7	Q10PJ7_ORYSJ	unreviewed	Helix-loop-helix DNA-binding domain containing protein, expressed	LOC_Os03g12940	DNA binding [GO:0003677]; protein dimerization activity [GO:0046983]			PF00646;PF00010;
31	LOC_Os03g12940	350.469	0.555869	0.150808	0.000191871	0.000726347	OsFBO13 - F-box and other domain containing protein, expressed	Os03g0231950	OsbHLH088	NA	NA	Q10PJ8	Q10PJ8_ORYSJ	unreviewed	Helix-loop-helix DNA-binding domain containing protein, expressed	LOC_Os03g12940	DNA binding [GO:0003677]; protein dimerization activity [GO:0046983]			PF00646;PF00010;
32	LOC_Os03g12940	350.469	0.555869	0.150808	0.000191871	0.000726347	OsFBO13 - F-box and other domain containing protein, expressed	Os03g0232000	OsFbox136, Os_F0187	NA	NA	Q10PJ7	Q10PJ7_ORYSJ	unreviewed	Helix-loop-helix DNA-binding domain containing protein, expressed	LOC_Os03g12940	DNA binding [GO:0003677]; protein dimerization activity [GO:0046983]			PF00646;PF00010;
33	LOC_Os03g12940	350.469	0.555869	0.150808	0.000191871	0.000726347	OsFBO13 - F-box and other domain containing protein, expressed	Os03g0232000	OsFbox136, Os_F0187	NA	NA	Q10PJ8	Q10PJ8_ORYSJ	unreviewed	Helix-loop-helix DNA-binding domain containing protein, expressed	LOC_Os03g12940	DNA binding [GO:0003677]; protein dimerization activity [GO:0046983]			PF00646;PF00010;
34	LOC_Os03g12940	350.469	0.555869	0.150808	0.000191871	0.000726347	OsFBO13 - F-box and other domain containing protein, expressed	Os03g0232000	OsFbox136, Os_F0187	NA	NA	Q10PJ6	Q10PJ6_ORYSJ	unreviewed	Helix-loop-helix DNA-binding domain containing protein, expressed	LOC_Os03g12940	DNA binding [GO:0003677]		osa:4332155;	PF00646;
35	LOC_Os03g12940	350.469	0.555869	0.150808	0.000191871	0.000726347	OsFBO13 - F-box and other domain containing protein, expressed	Os03g0231950	OsbHLH088	NA	NA	Q10PJ6	Q10PJ6_ORYSJ	unreviewed	Helix-loop-helix DNA-binding domain containing protein, expressed	LOC_Os03g12940	DNA binding [GO:0003677]		osa:4332155;	PF00646;
36	LOC_Os04g35010	44.0649	-0.183	1.04491	0.0198066	0.0446929	helix-loop-helix DNA-binding domain containing protein, expressed	Os04g0429400	OsbHLH144, OsEnS-65, bHLH144, EnS-65, OsZOU-1, OsZOU1, ZOU-1, ZOU1	NA	NA	Q0JD63	Q0JD63_ORYSJ	unreviewed	Os04g0429400 protein (cDNA clone:002-150-C12, full insert sequence)	Os04g0429400 OSNPB_040429400	protein dimerization activity [GO:0046983]		osa:4335859;	PF00010;
37	LOC_Os01g13460	506.434	-0.584646	0.18949	0.00164302	0.00505384	helix-loop-helix DNA-binding domain containing protein, expressed	Os01g0235700	OsbHLH008, bHLH008, OsMYL2, MYL2, DLN6, OsDLN6, OsMYC1, MYC1	NA	NA	A0A0P0V078	A0A0P0V078_ORYSJ	unreviewed	Os01g0235700 protein	Os01g0235700	protein dimerization activity [GO:0046983]		osa:4327781;	PF14215;PF00010;
38	LOC_Os01g70310	112.577	-0.786314	0.278836	0.00329734	0.00932563	inducer of CBF expression 2, putative, expressed	Os01g0928000	OsbHLH001, bHLH001, OsbHLH1, bHLH1, OsICE2, ICE2	NA	NA	Q5JK44	Q5JK44_ORYSJ	unreviewed	Os01g0928000 protein (Transcription factor ICE1-like)	Os01g0928000 OSJNBa0052O12.3 OSJNBa0093F16.39	protein dimerization activity [GO:0046983]			PF00010;
39	LOC_Os07g05010	507.943	-0.876987	0.239124	0.000153874	0.000594166	helix-loop-helix DNA-binding domain containing protein, expressed	Os07g0143200	OsPIL14, OsbHLH104, OsPIF14, PIF14, OsPIF14alpha, OsPIF14beta	NA	NA	Q8GRJ1	Q8GRJ1_ORYSJ	unreviewed	Transcription factor BHLH9-like protein	OJ1343_B12.103 OJ1351_C05.131	nucleus [GO:0005634]; protein dimerization activity [GO:0046983]; regulation of transcription, DNA-templated [GO:0006355]			PF00010;
40	LOC_Os04g23440	52.6924	-0.969845	0.463734	0.0188503	0.0428637	helix-loop-helix DNA-binding domain containing protein, expressed	Os04g0300600	OsbHLH007	NA	NA	Q7XKP5	Q7XKP5_ORYSJ	unreviewed	OSJNBb0013O03.11 protein (Os04g0300600 protein)	Os04g0300600 OSJNBb0013O03.11	nucleus [GO:0005634]; protein dimerization activity [GO:0046983]; regulation of transcription, DNA-templated [GO:0006355]			PF00010;
41	LOC_Os08g33590	10.0913	-1.28384	0.652152	0.0169527	0.0391379	basic helix-loop-helix, putative, expressed	Os08g0432800	OsbHLH038	NA	NA	A0A0P0XG99	A0A0P0XG99_ORYSJ	unreviewed	DNA-binding protein-like (Os08g0432800 protein)	Os08g0432800 P0431A03.9	nucleus [GO:0005634]; DNA binding [GO:0003677]; protein dimerization activity [GO:0046983]; regulation of transcription, DNA-templated [GO:0006355]		osa:4345648;	PF00010;
42	LOC_Os03g56950	496.82	-1.50962	0.327336	1.31e-06	7.36e-06	phytochrome-interacting factor 4, putative, expressed	Os03g0782500	OsPIL1, OsPIL13, OsbHLH152, bHLH152, PIF7, OsPIF7, OsPIF4, PIF4	NA	NA	Q10CH6	Q10CH6_ORYSJ	unreviewed	Helix-loop-helix DNA-binding domain containing protein, expressed	LOC_Os03g56950	DNA binding [GO:0003677]; protein dimerization activity [GO:0046983]			PF00010;
43	LOC_Os03g56950	496.82	-1.50962	0.327336	1.31e-06	7.36e-06	phytochrome-interacting factor 4, putative, expressed	Os03g0782500	OsPIL1, OsPIL13, OsbHLH152, bHLH152, PIF7, OsPIF7, OsPIF4, PIF4	NA	NA	Q10CH5	PIL13_ORYSJ	reviewed	Transcription factor PHYTOCHROME INTERACTING FACTOR-LIKE 13 (OsPIL13) (PIF-like protein 13) (Basic helix-loop-helix protein 152) (OsbHLH152) (OsPIL1)	PIL13 BHLH152 PIL1 Os03g0782500 LOC_Os03g56950	nucleus [GO:0005634]; DNA binding [GO:0003677]; protein dimerization activity [GO:0046983]; internode patterning [GO:0080006]; negative regulation of red or far-red light signaling pathway [GO:0090229]; positive regulation of transcription, DNA-templated [GO:0045893]; regulation of transcription, DNA-templated [GO:0006355]	SUBCELLULAR LOCATION: Nucleus {ECO:0000255|PROSITE-ProRule:PRU00981, ECO:0000269|PubMed:21549224, ECO:0000269|PubMed:22984180}.		PF00010;
44	LOC_Os01g57580	24.4744	-1.58643	0.507852	0.000473883	0.00164817	bHelix-loop-helix transcription factor, putative, expressed	Os01g0784900	OsbHLH069	NA	NA	Q5ZAK6	Q5ZAK6_ORYSJ	unreviewed	BHLH transcription factor-like protein (Os01g0784900 protein)	Os01g0784900 B1070A12.17	protein dimerization activity [GO:0046983]		osa:4327040;
45	LOC_Os05g50900	14.4311	-1.68017	0.60137	0.00127962	0.00404053	helix-loop-helix DNA-binding protein, putative, expressed	Os05g0586300	OsbHLH051, bHLH051, bHLH51, OsFAMA, FAMA	NA	NA	A0A0P0WRG0	A0A0P0WRG0_ORYSJ	unreviewed	Os05g0586300 protein	Os05g0586300 OSNPB_050586300	protein dimerization activity [GO:0046983]			PF00010;
46	LOC_Os09g29360	4.38478	-1.82115	0.970699	0.0129418	0.0310009	helix-loop-helix DNA-binding protein, putative, expressed	Os09g0468700	OsbHLH046	NA	NA	A0A0P0XP10	A0A0P0XP10_ORYSJ	unreviewed	Helix-loop-helix DNA-binding protein-like (Os09g0468700 protein)	Os09g0468700 OJ1595_D08.4 OsJ_29696 P0676H02.22	nucleus [GO:0005634]; DNA binding [GO:0003677]; protein dimerization activity [GO:0046983]; regulation of transcription, DNA-templated [GO:0006355]		osa:9267272;	PF00010;
47	LOC_Os07g36460	3.82147	-1.91078	1.25757	0.0187093	0.0426108	helix-loop-helix DNA-binding domain containing protein, expressed	Os07g0549600	Udt1, bHLH164, OsUDT1, OsbHLH164	NA	NA	B9FXT3	UDT1_ORYSJ	reviewed	Transcription factor UDT1 (Basic helix-loop-helix protein 164) (OsbHLH164) (Protein UNDEVELOPED TAPETUM 1)	UDT1 BHLH164 Os07g0549600 LOC_Os07g36460 OsJ_24663 P0534A03.125	nucleus [GO:0005634]; protein dimerization activity [GO:0046983]; anther wall tapetum development [GO:0048658]; pollen development [GO:0009555]	SUBCELLULAR LOCATION: Nucleus {ECO:0000255|PROSITE-ProRule:PRU00981, ECO:0000269|PubMed:16141453}.	osa:9269572;	PF00010;
48	LOC_Os02g55250	28.9933	-1.99168	0.414612	3.49e-07	2.16e-06	BHLH transcription factor, putative, expressed	Os02g0795800	OsbHLH114	NA	NA	Q6K8Y4	Q6K8Y4_ORYSJ	unreviewed	Basic helix-loop-helix (BHLH)-like	OJ1004_E04.3 OJ1695_H09.18	nucleus [GO:0005634]; protein dimerization activity [GO:0046983]; regulation of transcription, DNA-templated [GO:0006355]			PF00010;
49	LOC_Os08g37730	6.07056	-2.42535	0.951641	0.00138825	0.00434413	helix-loop-helix DNA-binding protein, putative, expressed	Os08g0483900	OsbHLH047, bHLH047	NA	NA	A0A0P0XHM7	A0A0P0XHM7_ORYSJ	unreviewed	Os08g0483900 protein (Putative basic-helix-loop-helix (BHLH)transcription factor)	Os08g0483900 OJ1111_H02.23 P0419H09.4	nucleus [GO:0005634]; protein dimerization activity [GO:0046983]; regulation of transcription, DNA-templated [GO:0006355]		osa:4345867;	PF00010;
50	LOC_Os01g68700	566.519	-2.46115	0.34313	1.09e-13	1.56e-12	BHLH transcription factor, putative, expressed	Os01g0915600	OsbHLH090	NA	NA	Q0JGM6	Q0JGM6_ORYSJ	unreviewed	Os01g0915600 protein (Putative bHLH transcription factor)	Os01g0915600 P0004D12.24	nucleus [GO:0005634]; DNA-binding transcription factor activity [GO:0003700]; protein dimerization activity [GO:0046983]; regulation of transcription, DNA-templated [GO:0006355]			PF00010;
51	LOC_Os02g39140	48.4969	-2.48121	0.366449	2.76e-12	3.36e-11	helix-loop-helix DNA-binding domain containing protein, expressed	Os02g0603600	OsbHLH110	NA	NA	A0A0P0VLP4	A0A0P0VLP4_ORYSJ	unreviewed	Os02g0603600 protein	Os02g0603600 OSNPB_020603600	nucleus [GO:0005634]; DNA-binding transcription activator activity, RNA polymerase II-specific [GO:0001228]
52	LOC_Os03g51580	55.0861	-2.68211	0.32471	2.21e-17	4.57e-16	helix-loop-helix DNA-binding domain containing protein, expressed	Os03g0725800	OsbHLH018	NA	NA	A0A0P0W350	A0A0P0W350_ORYSJ	unreviewed	Os03g0725800 protein (Putative symbiotic ammonium transport protein) (Putative transcription factor)	OSJNBb0122C16.8 Os03g0725800 OSJNBa0013A09.16	nucleus [GO:0005634]; DNA binding [GO:0003677]; protein dimerization activity [GO:0046983]; regulation of transcription, DNA-templated [GO:0006355]		osa:4333965;	PF00010;
53	LOC_Os02g56140	33.5434	-2.74724	0.381477	1.09e-13	1.56e-12	helix-loop-helix DNA-binding domain containing protein, expressed	Os02g0805250	OsbHLH107, bHLH107	NA	NA	A3ACF9	A3ACF9_ORYSJ	unreviewed	BHLH domain-containing protein	OsJ_08778	protein dimerization activity [GO:0046983]			PF00010;
54	LOC_Os11g32100	4.13164	-2.8814	2.11294	0.00924323	0.0231089	inducer of CBF expression 1, putative, expressed	Os11g0523700	OsbHLH002, bHLH002, OsbHLH2, bHLH2, OsICE1, ICE1, OsbHLH002/OsICE1	NA	NA	A0A5S6R9A7	A0A5S6R9A7_ORYSJ	unreviewed	Os11g0523700 protein	Os11g0523700	nucleus [GO:0005634]; DNA binding [GO:0003677]; protein dimerization activity [GO:0046983]; regulation of transcription, DNA-templated [GO:0006355]		osa:4350609;	PF00010;
55	LOC_Os09g32510	483.516	-2.90595	0.370513	5.28e-16	9.7e-15	BHLH transcription factor, putative, expressed	Os09g0501600	OsbHLH092	NA	NA	Q0J0S0	Q0J0S0_ORYSJ	unreviewed	Os09g0501600 protein (cDNA clone:001-021-C10, full insert sequence)	Os09g0501600 OSNPB_090501600	nucleus [GO:0005634]; DNA-binding transcription factor activity [GO:0003700]; protein dimerization activity [GO:0046983]		osa:4347486;	PF00010;
56	LOC_Os08g36740	5.53726	-3.01888	1.68964	0.00595255	0.0157144	bHelix-loop-helix transcription factor, putative, expressed	NA	NA	NA	NA	Q6Z9R3	Q6Z9R3_ORYSJ	unreviewed	Os08g0471401 protein	Os08g0471401 OSNPB_080471401	nucleus [GO:0005634]; protein dimerization activity [GO:0046983]; regulation of transcription, DNA-templated [GO:0006355]			PF00010;
57	LOC_Os06g12210	3.48765	-3.4042	2.52605	0.00550781	0.0146938	helix-loop-helix DNA-binding domain containing protein, expressed	Os06g0226500	ILI4, OsILI4, OsBU1, BU1/ILI4, OsbHLH172, bHLH172	NA	NA	Q0DDF6	ILI4_ORYSJ	reviewed	Transcription factor ILI4 (OsILI4) (Basic helix-loop-helix protein 172) (OsbHLH172) (Protein BRASSINOSTEROID UPREGULATED 1) (Protein INCREASED LEAF INCLINATION 4) (bHLH transcription factor bHLH172)	ILI4 BHLH172 BU1 Os06g0226500 LOC_Os06g12210 OsJ_20669	cytoplasm [GO:0005737]; nucleus [GO:0005634]; protein dimerization activity [GO:0046983]; brassinosteroid mediated signaling pathway [GO:0009742]; regulation of growth [GO:0040008]; response to brassinosteroid [GO:0009741]	SUBCELLULAR LOCATION: Cytoplasm {ECO:0000305|PubMed:19648232}.	osa:4340551;	PF00010;
58	LOC_Os05g04740	30.3833	-3.40871	0.525555	9.84e-12	1.13e-10	helix-loop-helix DNA-binding domain containing protein, expressed	Os05g0139100	APG, OsPIL16, OsbHLH106	NA	NA	Q6AT90	APG_ORYSJ	reviewed	Transcription factor APG (Basic helix-loop-helix protein 106) (OsbHLH106) (Protein ANTAGONIST OF PGL1) (bHLH transcription factor bHLH106)	APG Os05g0139100 LOC_Os05g04740 OSJNBa0069I13.9 OSJNBb0111O13.2	nucleus [GO:0005634]; protein dimerization activity [GO:0046983]; brassinosteroid mediated signaling pathway [GO:0009742]; regulation of seed growth [GO:0080113]	SUBCELLULAR LOCATION: Nucleus {ECO:0000255|PROSITE-ProRule:PRU00981, ECO:0000269|PubMed:22363621}.	osa:4337752;	PF00010;
59	LOC_Os04g52770	16.7717	-3.75988	0.576691	1.48e-11	1.66e-10	helix-loop-helix DNA-binding domain containing protein, expressed	Os04g0618600	OsbHLH101	NA	NA	Q7FA23	Q7FA23_ORYSJ	unreviewed	Os04g0618600 protein	Os04g0618600 OSNPB_040618600	nucleus [GO:0005634]; protein dimerization activity [GO:0046983]; regulation of transcription, DNA-templated [GO:0006355]		osa:4337015;	PF00010;
60	LOC_Os01g09930	12.3088	-3.78435	0.836308	9.3e-07	5.36e-06	helix-loop-helix DNA-binding domain containing protein, expressed	NA	NA	NA	NA	Q5SMX2	Q5SMX2_ORYSJ	unreviewed	Basic helix-loop-helix protein-like	P0498B01.25	nucleus [GO:0005634]; protein dimerization activity [GO:0046983]; regulation of transcription, DNA-templated [GO:0006355]			PF00010;
61	LOC_Os02g52190	5.608	-4.00176	1.32627	0.000332564	0.00119721	helix-loop-helix DNA-binding protein, putative, expressed	Os02g0759000	OsbHLH048	NA	NA	A3ABJ9	A3ABJ9_ORYSJ	unreviewed	BHLH domain-containing protein	OsJ_08458	protein dimerization activity [GO:0046983]		osa:4330791;	PF00010;
62	LOC_Os06g30090	7.32633	-4.34341	1.17218	6.41e-05	0.000268672	helix-loop-helix DNA-binding domain containing protein, expressed	Os06g0496400	OsbHLH127, bHLH127, OsRSL3, RSL3	NA	NA	A3BC08	A3BC08_ORYSJ	unreviewed	BHLH protein-like	B1089G05.30 OsJ_21438	nucleus [GO:0005634]; DNA-binding transcription activator activity, RNA polymerase II-specific [GO:0001228]; protein dimerization activity [GO:0046983]; regulation of transcription, DNA-templated [GO:0006355]		osa:107276693;	PF00010;
63	LOC_Os02g46560	19.2124	-4.35531	0.904465	1.33e-07	8.78e-07	helix-loop-helix DNA-binding protein, putative, expressed	Os02g0691500	OsbHLH049	NA	NA	A0A0P0VNG4	A0A0P0VNG4_ORYSJ	unreviewed	Putative basic-helix-loop-helix transcription factor	OJ1148_D05.9 OsJ_07997	nucleus [GO:0005634]; protein dimerization activity [GO:0046983]; regulation of transcription, DNA-templated [GO:0006355]		osa:9267196;	PF00010;
64	LOC_Os10g26410	5.85678	-4.57588	1.48462	0.000127804	0.000502193	bHLH family protein, putative, expressed	Os10g0403800	OsBUL3, BUL3, OsbHLH174, bHLH174	NA	NA	A3C4J6	A3C4J6_ORYSJ	unreviewed	Uncharacterized protein	OsJ_31454 OSJNBa0044A10.22	protein dimerization activity [GO:0046983]		osa:107278079;
65	LOC_Os01g51140	20.5729	-4.60479	0.809492	6.38e-09	5.13e-08	helix-loop-helix DNA-binding domain containing protein, expressed	Os01g0707500	OsbHLH118	NA	NA	Q7F4X6	Q7F4X6_ORYSJ	unreviewed	BHLH transcription factor-like (Os01g0707500 protein)	P0510F09.19-1 P0692C11.41-1 Os01g0707500 OsJ_03197	nucleus [GO:0005634]; protein dimerization activity [GO:0046983]; regulation of transcription, DNA-templated [GO:0006355]		osa:4327679;	PF00010;
66	LOC_Os03g08930	2.64432	-5.08487	2.90181	0.0011019	0.00353845	helix-loop-helix DNA-binding protein, putative, expressed	Os03g0188400	OsbHLH044, bHLH044, OsbHLH96, bHLH96, bHLH096	NA	NA	Q8H7N8	Q8H7N8_ORYSJ	unreviewed	BHLH transcription factor (Helix-loop-helix DNA-binding domain containing protein, expressed) (Os03g0188400 protein) (cDNA clone:002-130-B03, full insert sequence)	LOC_Os03g08930 Os03g0188400 OSNPB_030188400	nucleus [GO:0005634]; DNA binding [GO:0003677]; protein dimerization activity [GO:0046983]; regulation of transcription, DNA-templated [GO:0006355]		osa:4331887;	PF00010;
67	LOC_Os08g41320	298.379	-5.09699	0.298482	1.8e-66	7.12e-64	BHLH transcription factor, putative, expressed	Os08g0524800	OsbHLH091, bHLH091	NA	NA	Q84QW1	Q84QW1_ORYSJ	unreviewed	Os08g0524800 protein	Os08g0524800 OSNPB_080524800	nucleus [GO:0005634]; DNA-binding transcription factor activity [GO:0003700]; protein dimerization activity [GO:0046983]; regulation of transcription, DNA-templated [GO:0006355]		osa:4346087;	PF00010;
68	LOC_Os02g51320	3.44606	-5.19418	2.98985	0.00119414	0.00380004	helix-loop-helix DNA-binding domain containing protein, expressed	Os02g0747900	ILI5, OsILI5, PGL2, OsPGL2, Os170, OsBUL1, BUL1, ILI5/PGL2, OsbHLH170, bHLH170	NA	NA	Q6YUX0	ILI5_ORYSJ	reviewed	Transcription factor ILI5 (OsILI5) (Basic helix-loop-helix protein 170) (OsbHLH170) (Protein INCREASED LEAF INCLINATION 5) (Protein POSITIVE REGULATOR OF GRAIN LENGTH 2) (bHLH transcription factor bHLH170)	ILI5 BHLH170 PGL2 Os02g0747900 LOC_Os02g51320 OsJ_08379 OSJNBa0078N11.24	nucleus [GO:0005634]; protein dimerization activity [GO:0046983]; regulation of seed growth [GO:0080113]	SUBCELLULAR LOCATION: Nucleus {ECO:0000255|PROSITE-ProRule:PRU00981, ECO:0000269|PubMed:23136524}.	osa:4330725;	PF00010;
69	LOC_Os04g54900	2.93622	-5.45455	2.77515	0.000376667	0.00133959	bHLH family protein, putative, expressed	Os04g0641700	ILI1, OsbHLH154, OsILI1	NA	NA	Q7X742	ILI1_ORYSJ	reviewed	Transcription factor ILI1 (OsILI1) (Basic helix-loop-helix protein 154) (OsbHLH154) (Protein INCREASED LEAF INCLINATION 1) (bHLH transcription factor bHLH154)	BHLH154 ILI1 Os04g0641700 LOC_Os04g54900 OsJ_16370 OSJNBa0063C18.7 OSJNBb0079B02.12	protein dimerization activity [GO:0046983]; regulation of growth [GO:0040008]; response to brassinosteroid [GO:0009741]; unidimensional cell growth [GO:0009826]		osa:107278038;	PF00010;
70	LOC_Os03g07540	9.34749	-6.02778	1.42702	9.25e-07	5.33e-06	bHLH family protein, putative, expressed	Os03g0171700	OsILI3, OsbHLH153, bHLH153, OsBUL2, BUL2	NA	NA	Q10R47	ILI3_ORYSJ	reviewed	Transcription factor ILI3 (OsILI3) (Basic helix-loop-helix protein 153) (OsbHLH153) (Protein INCREASED LEAF INCLINATION 3) (bHLH transcription factor bHLH153)	ILI3 BHLH153 Os03g0171700 LOC_Os03g07540 OsJ_09590	protein dimerization activity [GO:0046983]; regulation of growth [GO:0040008]		osa:4331778;	PF00010;
71	LOC_Os03g03000	4.62914	-6.33984	3.11826	0.000319432	0.00115547	helix-loop-helix DNA-binding domain containing protein, expressed	Os03g0122100	OsbHLH052	NA	NA	Q10SI5	Q10SI5_ORYSJ	unreviewed	Uncharacterized protein OJ1126B12.2	OJ1126B12.2	nucleus [GO:0005634]; DNA binding [GO:0003677]; protein dimerization activity [GO:0046983]; regulation of transcription, DNA-templated [GO:0006355]			PF00010;
72	LOC_Os09g33580	26.938	-7.4219	1.54769	3.36e-08	2.44e-07	BEE 1, putative, expressed	Os09g0510500	OsbHLH081, bHLH081, OsBC1, BC1, OsbHLH082	NA	NA	Q0J0G7	Q0J0G7_ORYSJ	unreviewed	Os09g0510500 protein (cDNA clone:J013053A18, full insert sequence)	Os09g0510500 OSNPB_090510500	nucleus [GO:0005634]; DNA-binding transcription factor activity [GO:0003700]; protein dimerization activity [GO:0046983]		osa:4347540;	PF00010;
73	LOC_Os01g38610	197.38	-7.52471	0.837045	1.08e-19	2.76e-18	helix-loop-helix DNA-binding domain containing protein, expressed	Os01g0566701		NA	NA	Q0JLV0	Q0JLV0_ORYSJ	unreviewed	Os01g0566800 protein (Fragment)	Os01g0566800	protein dimerization activity [GO:0046983]			PF00010;
74	LOC_Os01g38610	197.38	-7.52471	0.837045	1.08e-19	2.76e-18	helix-loop-helix DNA-binding domain containing protein, expressed	Os01g0566800	OsbHLH117, bHLH117	NA	NA	Q0JLV0	Q0JLV0_ORYSJ	unreviewed	Os01g0566800 protein (Fragment)	Os01g0566800	protein dimerization activity [GO:0046983]			PF00010;
75	LOC_Os10g39750	32.101	-7.67661	1.36957	2.88e-10	2.76e-09	inducer of CBF expression 2, putative, expressed	Os10g0544200	OsbHLH004	NA	NA	Q336V8	Q336V8_ORYSJ	unreviewed	Helix-loop-helix DNA-binding domain containing protein, expressed (Os10g0544200 protein) (cDNA clone:001-119-D04, full insert sequence)	LOC_Os10g39750 Os10g0544200 OSNPB_100544200	nucleus [GO:0005634]; DNA binding [GO:0003677]; protein dimerization activity [GO:0046983]; regulation of transcription, DNA-templated [GO:0006355]			PF00010;
76	LOC_Os08g42470	8.34761	-7.67661	2.97519	4.79e-06	2.45e-05	BEE 1, putative, expressed	Os08g0536800	OsbHLH080	NA	NA	A3BV95	A3BV95_ORYSJ	unreviewed	BHLH domain-containing protein	OsJ_28098	protein dimerization activity [GO:0046983]; regulation of transcription, DNA-templated [GO:0006355]		osa:4346166;	PF00010;
77	LOC_Os11g25560	237.02	-8.08601	0.876965	3.28e-21	9.5e-20	BHLH transcription factor, putative, expressed	Os11g0442500		NA	NA	Q2R5B7	Q2R5B7_ORYSJ	unreviewed	Expressed protein	LOC_Os11g25560	protein dimerization activity [GO:0046983]; regulation of transcription, DNA-templated [GO:0006355]
78	LOC_Os03g04310	22.3431	-9.58439	2.90399	2e-12	2.48e-11	BHLH transcription factor, putative, expressed	Os03g0135700	OsRAI1, RAI1, OsbHLH003, bHLH003, bHLH3	NA	NA	Q10S44	Q10S44_ORYSJ	unreviewed	Basic helix-loop-helix, putative, expressed (Os03g0135700 protein) (cDNA clone:006-303-F08, full insert sequence)	LOC_Os03g04310 Os03g0135700 OSNPB_030135700	protein dimerization activity [GO:0046983]		osa:4331538;	PF00010;

## Sheet: bZIP_root
Sl No	bZIP	baseMean	log2FoldChange	lfcSE	pvalue	padj	MSU_annotation	RAPD	Oryzabase_symbol	Custom.Annot	References	UNIPROT	Uniprot.Entry.name	Status	Protein.names	Gene.names	Gene.ontology..GO.	Subcellular.location..CC.	Cross.reference..KEGG.	Cross.reference..Pfam.
1	LOC_Os01g64000	9.21835	3.65763	1.09662	0.000106602	0.000667004	bZIP transcription factor, putative, expressed	Os01g0859300	OsABI5, OsbZIP10, OsABF1, OREB1, OsABI5-1, OsABI5-2, OsOREB1, OREB1			Q8RZ35	ABI5_ORYSJ	reviewed	bZIP transcription factor ABI5 homolog (OsABI5) (bZIP transcription factor 10) (OsBZIP10)	ABI5 BZIP10 OREB1 Os01g0859300 LOC_Os01g64000 OsJ_04142 P0489B03.11 P0679C12.1	nucleus [GO:0005634]; DNA-binding transcription factor activity [GO:0003700]; protein homodimerization activity [GO:0042803]; sequence-specific DNA binding [GO:0043565]; abscisic acid-activated signaling pathway [GO:0009738]; pollen maturation [GO:0010152]; regulation of transcription, DNA-templated [GO:0006355]; response to abscisic acid [GO:0009737]; response to cold [GO:0009409]; response to s…	SUBCELLULAR LOCATION: Nucleus {ECO:0000255|PROSITE-ProRule:PRU00978, ECO:0000269|PubMed:18236009, ECO:0000269|PubMed:21055780, ECO:0000269|PubMed:22071266, ECO:0000269|PubMed:28000033}.	osa:4325061;	PF00170;
2	LOC_Os07g08420	32.3327	3.1743	0.547698	7.23e-10	1.15e-08	bZIP transcription factor domain containing protein, expressed	Os07g0182000	OsbZIP58, OsEnS-92, OsSMF1, SMF1, OsRISBZ1			Q6ZLB0	RSBZ1_ORYSJ	reviewed	bZIP transcription factor RISBZ1 (Rice seed bZIP1) (bZIP transcription factor 58) (OsbZIP58)	RISBZ1 BZIP58 Os07g0182000 LOC_Os07g08420 OJ1014_E09.42 OsJ_23334	nucleus [GO:0005634]; DNA-binding transcription factor activity [GO:0003700]; sequence-specific DNA binding [GO:0043565]; positive regulation of transcription, DNA-templated [GO:0045893]; regulation of starch biosynthetic process [GO:0010581]	SUBCELLULAR LOCATION: Nucleus {ECO:0000255|PROSITE-ProRule:PRU00978, ECO:0000269|PubMed:19473328}.	osa:4342570;	PF00170;PF12498;
3	LOC_Os12g43790	7.49673	2.02622	0.868268	0.00211381	0.0092591	bZIP transcription factor domain containing protein, expressed	Os12g0634500	OsbZIP89			Q2QLP2	Q2QLP2_ORYSJ	unreviewed	BZIP transcription factor family protein, expressed (Os12g0634500 protein)	LOC_Os12g43790 Os12g0634500 OSNPB_120634500	nucleus [GO:0005634]; DNA-binding transcription factor activity [GO:0003700]; sequence-specific DNA binding [GO:0043565]; transcription regulatory region DNA binding [GO:0044212]; positive regulation of transcription, DNA-templated [GO:0045893]		osa:9272516;	PF00170;
4	LOC_Os08g07970	195.905	1.64947	0.192806	2.22e-18	1.05e-16	transcription factor, putative, expressed	Os08g0176900	OsbZIP64			Q6ZBS8	TGL10_ORYSJ	reviewed	Transcription factor TGAL10 (bZIP transcription factor 64) (OsbZIP64)	TGAL10 Os08g0176900 LOC_Os08g07970 OJ1120_C08.7 P0583B06.15	nucleus [GO:0005634]; DNA-binding transcription factor activity [GO:0003700]; sequence-specific DNA binding [GO:0043565]; defense response [GO:0006952]; transcription, DNA-templated [GO:0006351]	SUBCELLULAR LOCATION: Nucleus {ECO:0000255|PROSITE-ProRule:PRU00978}.		PF00170;PF14144;
5	LOC_Os01g46970	91.3074	1.58257	0.27861	2.49e-09	3.67e-08	transcription factor, putative, expressed	Os01g0658900	OsBZ8, OsbZIP05, OsGBF1, GBF1, OsGBF1a, OsGBF1b			B9EYF3	B9EYF3_ORYSJ	unreviewed	Os01g0658900 protein	Os01g0658900 OsJ_02888	nucleus [GO:0005634]; DNA-binding transcription factor activity [GO:0003700]; sequence-specific DNA binding [GO:0043565]; regulation of transcription, DNA-templated [GO:0006355]		osa:4327165;	PF00170;PF07777;
6	LOC_Os06g41100	129.206	1.47383	0.233415	5.71e-11	1.07e-09	transcription factor, putative, expressed	Os06g0614100	OsbZIP49			Q69T21	TGAL8_ORYSJ	reviewed	Transcription factor TGAL8 (bZIP transcription factor 49) (OsbZIP49)	TGAL8 Os06g0614100 LOC_Os06g41100 OsJ_21969 P0417G12.29 P0691E09.5	nucleus [GO:0005634]; DNA-binding transcription factor activity [GO:0003700]; sequence-specific DNA binding [GO:0043565]; defense response [GO:0006952]; transcription, DNA-templated [GO:0006351]	SUBCELLULAR LOCATION: Nucleus {ECO:0000255|PROSITE-ProRule:PRU00978}.	osa:4341530;	PF00170;PF14144;
7	LOC_Os06g50830	30.6024	1.39128	0.412503	0.000159954	0.000958894	bZIP transcription factor domain containing protein, expressed	Os06g0724000	OsbZIP56, OsFD5			A0A0P0X1A0	A0A0P0X1A0_ORYSJ	unreviewed	Os06g0719500 protein (Fragment)	Os06g0719500 OSNPB_060719500	nucleus [GO:0005634]; DNA-binding transcription factor activity [GO:0003700]			PF00170;
8	LOC_Os06g50830	30.6024	1.39128	0.412503	0.000159954	0.000958894	bZIP transcription factor domain containing protein, expressed	Os06g0724000	OsbZIP56, OsFD5			A0A0P0X170	A0A0P0X170_ORYSJ	unreviewed	Os06g0724000 protein	Os06g0724000 OSNPB_060724000	integral component of membrane [GO:0016021]
9	LOC_Os04g54474	311.251	1.38566	0.177443	1.41e-15	4.93e-14	transcription factor, putative, expressed	Os04g0637000	OsTGAP1, TGAP1, OsbZIP37			A0A0P0WFC8	TGAL6_ORYSJ	reviewed	Transcription factor TGAL6 (bZIP transcription factor 37) (OsbZIP37)	TGAL6 Os04g0637000 LOC_Os04g54474 OsJ_16330 OSJNBb0034I13.13	nucleus [GO:0005634]; DNA-binding transcription factor activity [GO:0003700]; sequence-specific DNA binding [GO:0043565]; defense response [GO:0006952]; transcription, DNA-templated [GO:0006351]	SUBCELLULAR LOCATION: Nucleus {ECO:0000255|PROSITE-ProRule:PRU00978}.	osa:9270267;	PF00170;PF14144;
10	LOC_Os01g36220	38.2458	1.34918	0.355391	3.32e-05	0.000237694	bZIP transcription factor domain containing protein, expressed	Os01g0542700	OsbZIP04, OsbZIP4			A0A0P0V421	A0A0P0V421_ORYSJ	unreviewed	Os01g0542700 protein	Os01g0542700 OSJNBa0062A24.41 OSJNBa0065J17.8	nucleus [GO:0005634]; DNA-binding transcription factor activity [GO:0003700]; sequence-specific DNA binding [GO:0043565]; transcription regulatory region DNA binding [GO:0044212]; positive regulation of transcription, DNA-templated [GO:0045893]		osa:4326871;	PF00170;
11	LOC_Os09g28310	56.1572	1.28292	0.296072	3.85e-06	3.37e-05	bZIP transcription factor, putative, expressed	Os09g0456200	OsbZIP72, OsAREB2, OsABF4, Osbzip72, OsABI5, ABI5			Q67TQ5	Q67TQ5_ORYSJ	unreviewed	Os09g0456200 protein (cDNA clone:J013049N23, full insert sequence)	Os09g0456200 OSNPB_090456200	nucleus [GO:0005634]; DNA-binding transcription factor activity [GO:0003700]		osa:4347257;	PF00170;
12	LOC_Os08g26880	85.9663	1.22639	0.261119	7.51e-07	7.46e-06	bZIP transcription factor domain containing protein, expressed	Os08g0357300	OsbZIP65			A3BSC5	A3BSC5_ORYSJ	unreviewed	BZIP domain-containing protein	OsJ_27035	DNA-binding transcription factor activity [GO:0003700]		osa:4345363;	PF00170;
13	LOC_Os09g13570	412.253	1.21685	0.204981	8.55e-10	1.35e-08	CPuORF2 - conserved peptide uORF-containing transcript, expressed	Os09g0306400	OsbZIP71, DLN221, OsDLN221, DLN222, OsDLN222			Q69KN5	Q69KN5_ORYSJ	unreviewed	Os09g0306400 protein (cDNA clone:J013000L18, full insert sequence) (cDNA clone:J013001A19, full insert sequence) (cDNA clone:J023058F04, full insert sequence)	Os09g0306400 OSNPB_090306400	nucleus [GO:0005634]; DNA-binding transcription factor activity [GO:0003700]; sequence-specific DNA binding [GO:0043565]; transcription regulatory region DNA binding [GO:0044212]; positive regulation of transcription, DNA-templated [GO:0045893]		osa:4346672;	PF00170;
14	LOC_Os06g50600	230.544	1.19153	0.217843	1.35e-08	1.76e-07	bZIP transcription factor domain containing protein, expressed	Os06g0720900	OsbZIP55, OsFD2			A0A0P0X1A0	A0A0P0X1A0_ORYSJ	unreviewed	Os06g0719500 protein (Fragment)	Os06g0719500 OSNPB_060719500	nucleus [GO:0005634]; DNA-binding transcription factor activity [GO:0003700]			PF00170;
15	LOC_Os09g29820	90.2498	1.15685	0.246542	8.29e-07	8.15e-06	bZIP transcription factor domain containing protein, expressed	Os09g0474000	OsbZIP73, bZIP73, OsTFX1			Q69JJ9	Q69JJ9_ORYSJ	unreviewed	Os09g0474000 protein (cDNA clone:002-141-G12, full insert sequence)	Os09g0474000 OSNPB_090474000	nucleus [GO:0005634]; DNA-binding transcription factor activity [GO:0003700]; sequence-specific DNA binding [GO:0043565]; transcription regulatory region DNA binding [GO:0044212]; positive regulation of transcription, DNA-templated [GO:0045893]		osa:4347354;	PF00170;
16	LOC_Os03g19370	68.2167	1.11993	0.305137	7.48e-05	0.000486501	CPuORF4 - conserved peptide uORF-containing transcript, expressed	Os03g0306700	OsbZIP27			Q0DSI5	Q0DSI5_ORYSJ	unreviewed	Os03g0306700 protein	Os03g0306700	DNA-binding transcription factor activity [GO:0003700]		osa:4332602;	PF00170;
17	LOC_Os09g36910	19.6932	1.07153	0.511563	0.0103718	0.0351954	bZIP transcription factor domain containing protein, expressed	Os09g0540800	OsbZIP77, OsFD1, FD1			A0A0P0XR34	A0A0P0XR34_ORYSJ	unreviewed	Os09g0540800 protein	Os09g0540800 OSNPB_090540800	nucleus [GO:0005634]; DNA-binding transcription factor activity [GO:0003700]		osa:9271661;	PF00170;
18	LOC_Os06g50480	79.2304	0.966441	0.283229	0.000240492	0.00138015	bZIP transcription factor domain containing protein, expressed	Os06g0719500	OsbZIP54, OsFD6			C7J3L3	C7J3L3_ORYSJ	unreviewed	Os06g0719500 protein	Os06g0719500	DNA-binding transcription factor activity [GO:0003700]			PF00170;
19	LOC_Os01g64730	123.909	0.869003	0.220926	3.88e-05	0.000273238	bZIP transcription factor domain containing protein, expressed	Os01g0867300	OsbZIP12, OsABF1, ABF1, OsOSE2, OSE2			Q0JHF1	BZP12_ORYSJ	reviewed	bZIP transcription factor 12 (OsBZIP12) (Abscisic acid responsive elements-binding factor 1) (ABA responsive element binding factor 1) (ABRE-binding factor 1) (OsABF1)	BZIP12 ABF1 OSE2 Os01g0867300 LOC_Os01g64730 P0677H08.2-1	nucleus [GO:0005634]; DNA-binding transcription factor activity [GO:0003700]; sequence-specific DNA binding [GO:0043565]; abscisic acid-activated signaling pathway [GO:0009738]; positive regulation of abscisic acid-activated signaling pathway [GO:0009789]; positive regulation of response to salt stress [GO:1901002]; positive regulation of response to water deprivation [GO:1902584]; positive regul…	SUBCELLULAR LOCATION: Nucleus {ECO:0000269|PubMed:20039193}.	osa:4325078;	PF00170;
20	LOC_Os01g64020	271.821	0.843813	0.215065	4.18e-05	0.000291921	transcription factor, putative, expressed	Os01g0859500	OsLG2, OsbZIP11, BZIP11			Q5N7C7	LG2_ORYSJ	reviewed	Transcription factor LG2 (Protein LIGULELESS 2 homolog) (OsLG2) (rLG2) (bZIP transcription factor 11) (OsbZIP11)	LG2 Os01g0859500 LOC_Os01g64020 OsJ_04144 P0489B03.13 P0679C12.3	nucleus [GO:0005634]; DNA-binding transcription factor activity [GO:0003700]; sequence-specific DNA binding [GO:0043565]; defense response [GO:0006952]; positive regulation of transcription, DNA-templated [GO:0045893]; transcription, DNA-templated [GO:0006351]	SUBCELLULAR LOCATION: Nucleus {ECO:0000255|PROSITE-ProRule:PRU00978}.	osa:4325063;	PF00170;PF14144;
21	LOC_Os02g07840	156.456	0.834882	0.248458	0.000368894	0.00201348	bZIP transcription factor domain containing protein, expressed	Os02g0175100	OsbZIP15			Q6H500	RSBZ4_ORYSJ	reviewed	bZIP transcription factor RISBZ4 (Rice seed bZIP4) (bZIP transcription factor 15) (OsbZIP15)	RISBZ4 BZIP15 RITA-2 Os02g0175100 LOC_Os02g07840 OJ1077_E05.6 OsJ_05580 OSJNBa0073A21.32	nucleus [GO:0005634]; DNA binding [GO:0003677]; DNA-binding transcription factor activity [GO:0003700]	SUBCELLULAR LOCATION: Nucleus {ECO:0000255|PROSITE-ProRule:PRU00978}.	osa:4328469;	PF00170;
22	LOC_Os12g05680	213.175	0.726603	0.22541	0.000716704	0.00360084	transcription factor, putative, expressed	Os12g0152900	OsbZIP83, TGAL11, OsTGAL11			Q2QXL0	TGL11_ORYSJ	reviewed	Transcription factor TGAL11 (bZIP transcription factor 83) (OsbZIP83)	TGAL11 Os12g0152900 LOC_Os12g05680 OsJ_35251	nucleus [GO:0005634]; DNA-binding transcription factor activity [GO:0003700]; sequence-specific DNA binding [GO:0043565]; defense response [GO:0006952]; transcription, DNA-templated [GO:0006351]	SUBCELLULAR LOCATION: Nucleus {ECO:0000255|PROSITE-ProRule:PRU00978}.	osa:4351527;	PF00170;PF14144;
23	LOC_Os11g05480	976.51	0.716771	0.135992	8.1e-08	9.43e-07	transcription factor, putative, expressed	Os11g0152700	OsbZIP79			Q53Q70	TGAL4_ORYSJ	reviewed	Transcription factor TGAL4 (bZIP transcription factor 79) (OsbZIP79)	TGAL4 Os11g0152700 LOC_Os11g05480	nucleus [GO:0005634]; DNA-binding transcription factor activity [GO:0003700]; sequence-specific DNA binding [GO:0043565]; defense response [GO:0006952]; transcription, DNA-templated [GO:0006351]	SUBCELLULAR LOCATION: Nucleus {ECO:0000255|PROSITE-ProRule:PRU00978}.	osa:4349800;	PF00170;PF14144;
24	LOC_Os05g41540	204.123	0.705798	0.200739	0.000257633	0.00146607	bZIP transcription factor domain containing protein, expressed	Os05g0495200	OsbZIP44			Q65X73	Q65X73_ORYSJ	unreviewed	Os05g0495200 protein (cDNA clone:002-110-E11, full insert sequence) (cDNA clone:J023018E07, full insert sequence)	Os05g0495200 OSNPB_050495200	DNA-binding transcription factor activity [GO:0003700]		osa:4339196;	PF07716;
25	LOC_Os09g10840	388.005	0.654406	0.198538	0.000616179	0.00315907	transcription factor, putative, expressed	Os09g0280500	OsbZIP70			A3BWV0	A3BWV0_ORYSJ	unreviewed	Uncharacterized protein	OsJ_28661	DNA-binding transcription factor activity [GO:0003700]; sequence-specific DNA binding [GO:0043565]; transcription, DNA-templated [GO:0006351]			PF00170;PF14144;
26	LOC_Os09g10840	388.005	0.654406	0.198538	0.000616179	0.00315907	transcription factor, putative, expressed	Os09g0280500	OsbZIP70			Q6H434	TGAL7_ORYSJ	reviewed	Transcription factor TGAL7 (bZIP transcription factor 70) (OsbZIP70)	TGAL7 Os09g0280500 LOC_Os09g10840 P0651G05.17	nucleus [GO:0005634]; DNA-binding transcription factor activity [GO:0003700]; sequence-specific DNA binding [GO:0043565]; defense response [GO:0006952]; transcription, DNA-templated [GO:0006351]	SUBCELLULAR LOCATION: Nucleus {ECO:0000255|PROSITE-ProRule:PRU00978}.	osa:4346610;	PF00170;PF14144;
27	LOC_Os03g20310	565.227	0.457466	0.140772	0.000925834	0.00450095	transcription factor HBP-1b, putative, expressed	Os03g0318600	OsbZIP28, OsbZIP1, OsNIF1, OsTGA3, TGA3, OsTGA3/OsbZIP08			Q6IVC3	TGA22_ORYSJ	reviewed	Transcription factor TGA2.2 (OsNIF1) (OsbZIP1) (bZIP transcription factor 28) (OsbZIP28)	TGA2.2 Os03g0318600 LOC_Os03g20310 OsJ_10635	nucleus [GO:0005634]; DNA-binding transcription factor activity [GO:0003700]; sequence-specific DNA binding [GO:0043565]; defense response [GO:0006952]; transcription, DNA-templated [GO:0006351]	SUBCELLULAR LOCATION: Nucleus {ECO:0000255|PROSITE-ProRule:PRU00978}.	osa:4332660;	PF00170;PF14144;
28	LOC_Os03g58250	227.996	-0.600167	0.225936	0.00518514	0.0197989	bZIP transcription factor domain containing protein, expressed	Os03g0796900	OsZIP33, RISBZ2, OsbZIP33			Q7X9A8	RSBZ2_ORYSJ	reviewed	bZIP transcription factor RISBZ2 (Rice endosperm bZIP) (Rice seed bZIP2) (bZIP transcription factor 33) (OsbZIP33)	RISBZ2 BZIP33 REB Os03g0796900 LOC_Os03g58250 OSJNBa0094F01.19	nucleus [GO:0005634]; DNA binding [GO:0003677]; DNA-binding transcription factor activity [GO:0003700]	SUBCELLULAR LOCATION: Nucleus {ECO:0000255|PROSITE-ProRule:PRU00978}.	osa:4334424;	PF00170;PF12498;
29	LOC_Os12g06520	220.908	-0.619473	0.19267	0.000846527	0.00415526	bZIP transcription factor domain containing protein, expressed	Os12g0162500	OsbZIP84, BZIP84			Q2QXC3	Q2QXC3_ORYSJ	unreviewed	BZIP transcriptional activator RSG, putative, expressed (Os12g0162500 protein)	LOC_Os12g06520 Os12g0162500 OSNPB_120162500	nucleus [GO:0005634]; DNA-binding transcription factor activity [GO:0003700]		osa:4351576;	PF00170;
30	LOC_Os06g43870	159.641	-0.641046	0.199841	0.000840132	0.0041297	expressed protein	NA	NA			B9FQ75	B9FQ75_ORYSJ	unreviewed	Uncharacterized protein	OsJ_22155
31	LOC_Os09g31390	58.8177	-0.711077	0.304946	0.0108131	0.0364082	transcription factor, putative, expressed	Os09g0489500	OsbZIP74, OsTGA10, TGA10			B9G4A4	B9G4A4_ORYSJ	unreviewed	Uncharacterized protein	OsJ_29832	DNA-binding transcription factor activity [GO:0003700]; sequence-specific DNA binding [GO:0043565]; transcription, DNA-templated [GO:0006351]		osa:4347436;	PF00170;PF14144;
32	LOC_Os09g31390	58.8177	-0.711077	0.304946	0.0108131	0.0364082	transcription factor, putative, expressed	Os09g0489500	OsbZIP74, OsTGA10, TGA10			Q0J0P4	Q0J0P4_ORYSJ	unreviewed	Os09g0489500 protein	Os09g0489500 OSNPB_090489500	DNA-binding transcription factor activity [GO:0003700]; sequence-specific DNA binding [GO:0043565]; transcription, DNA-templated [GO:0006351]			PF00170;PF14144;
33	LOC_Os06g45140	412.832	-0.744107	0.312227	0.0088065	0.030706	bZIP transcription factor domain containing protein, expressed	Os06g0662200	OsbZIP52			Q654B3	RSBZ5_ORYSJ	reviewed	bZIP transcription factor RISBZ5 (Rice seed bZIP5) (bZIP transcription factor 52) (OsbZIP52)	RISBZ5 BZIP52 Os06g0662200 LOC_Os06g45140 OsJ_22252 OSJNBb0065C04.12	nucleus [GO:0005634]; DNA binding [GO:0003677]; DNA-binding transcription factor activity [GO:0003700]	SUBCELLULAR LOCATION: Nucleus {ECO:0000255|PROSITE-ProRule:PRU00978, ECO:0000269|PubMed:22189955}.	osa:4341753;	PF00170;
34	LOC_Os05g37170	139.774	-0.828977	0.243512	0.000313714	0.00174639	transcription factor, putative, expressed	Os05g0443900	OsbZIP41, TGA1			B9FPU7	B9FPU7_ORYSJ	unreviewed	Uncharacterized protein	OsJ_18714	DNA-binding transcription factor activity [GO:0003700]; sequence-specific DNA binding [GO:0043565]; transcription, DNA-templated [GO:0006351]			PF00170;PF14144;
35	LOC_Os05g37170	139.774	-0.828977	0.243512	0.000313714	0.00174639	transcription factor, putative, expressed	Os05g0443900	OsbZIP41, TGA1			Q6F2N0	TGAL5_ORYSJ	reviewed	Transcription factor TGAL5 (bZIP transcription factor 41) (OsbZIP41)	TGAL5 Os05g0443900 LOC_Os05g37170 OSJNBa0020H14.17	nucleus [GO:0005634]; DNA-binding transcription factor activity [GO:0003700]; sequence-specific DNA binding [GO:0043565]; defense response [GO:0006952]; transcription, DNA-templated [GO:0006351]	SUBCELLULAR LOCATION: Nucleus {ECO:0000255|PROSITE-ProRule:PRU00978}.	osa:4338933;	PF00170;PF14144;
36	LOC_Os02g52780	524.28	-0.970672	0.156504	1.77e-10	3.1e-09	bZIP transcription factor, putative, expressed	Os02g0766700	OsbZIP23, OsAREB1, OsABF2, Osbzip23, OsAREB2, OsZIP23, ZIP23			Q6Z312	BZP23_ORYSJ	reviewed	bZIP transcription factor 23 (OsBZIP23) (ABRE-binding factor 2) (OsABF2) (Abscisic acid responsive elements-binding factor 1) (OsAREB1)	BZIP23 ABF2 AREB1 Os02g0766700 LOC_Os02g52780 OJ1004_A11.20 P0539D10.39	nucleus [GO:0005634]; DNA binding [GO:0003677]; DNA-binding transcription factor activity [GO:0003700]; abscisic acid-activated signaling pathway [GO:0009738]; response to salt stress [GO:0009651]; response to water deprivation [GO:0009414]	SUBCELLULAR LOCATION: Nucleus {ECO:0000255|PROSITE-ProRule:PRU00978, ECO:0000269|PubMed:18931143}.	osa:4330838;	PF00170;
37	LOC_Os03g21800	54.0162	-1.32368	0.310963	4.94e-06	4.22e-05	bZIP transcription factor family protein, putative, expressed	Os03g0336200	RF2b, OsbZIP30			Q6S4P4	RF2B_ORYSJ	reviewed	Transcription factor RF2b	RF2b Os03g0336200 LOC_Os03g21800	nucleus [GO:0005634]; DNA binding [GO:0003677]; DNA-binding transcription factor activity [GO:0003700]	SUBCELLULAR LOCATION: Nucleus {ECO:0000255|PROSITE-ProRule:PRU00978, ECO:0000269|PubMed:14704272}.	osa:4332761;	PF00170;
38	LOC_Os05g49420	277.144	-1.34783	0.299243	1.51e-06	1.43e-05	transcription factor, putative, expressed	Os05g0569300	OsbZIP45			Q6AUN3	Q6AUN3_ORYSJ	unreviewed	Os05g0569300 protein	Os05g0569300 OSNPB_050569300	nucleus [GO:0005634]; DNA-binding transcription factor activity [GO:0003700]; sequence-specific DNA binding [GO:0043565]; regulation of transcription, DNA-templated [GO:0006355]		osa:4339653;	PF00170;PF07777;
39	LOC_Os12g09250	27.5887	-2.31152	0.531224	1.35e-06	1.28e-05	bZIP transcription factor domain containing protein, expressed	Os12g0194600	OsbZIP85			A0A0P0Y7R8	A0A0P0Y7R8_ORYSJ	unreviewed	Os12g0194600 protein	Os12g0194600 OSNPB_120194600	DNA-binding transcription factor activity [GO:0003700]		osa:4351714;
40	LOC_Os07g48180	15.1314	-2.38964	0.611533	1.15e-05	9.12e-05	bZIP transcription factor domain containing protein, expressed	Os07g0679500	OsbZIP61			Q0D3L8	Q0D3L8_ORYSJ	unreviewed	Os07g0679500 protein (Fragment)	Os07g0679500	DNA-binding transcription factor activity [GO:0003700]			PF00170;
41	LOC_Os12g06010	4.60728	-2.43512	1.44735	0.00785062	0.0279622	retrotransposon protein, putative, unclassified, expressed	Os12g0156200				Q0IPZ9	Q0IPZ9_ORYSJ	unreviewed	Os12g0156200 protein	Os12g0156200	DNA-binding transcription factor activity [GO:0003700]; nucleic acid binding [GO:0003676]; RNA-DNA hybrid ribonuclease activity [GO:0004523]			PF00078;PF13456;PF13966;
42	LOC_Os01g11350	5.78042	-2.48823	1.17451	0.00324543	0.013296	bZIP transcription factor domain containing protein, expressed	Os01g0211800	OsbZIP02, OsbZIP2, OsSTA8			Q5QNI5	BZP02_ORYSJ	reviewed	Basic leucine zipper 2 (OsbZIP02) (bZIP protein 2)	BZIP02 Os01g0211800 LOC_Os01g11350 P0031E09.34	nucleus [GO:0005634]; DNA binding [GO:0003677]; DNA-binding transcription factor activity [GO:0003700]; positive regulation of transcription, DNA-templated [GO:0045893]	SUBCELLULAR LOCATION: Nucleus {ECO:0000255|PROSITE-ProRule:PRU00978}.		PF00170;
43	LOC_Os04g41820	22.4095	-2.84536	0.541327	1.79e-08	2.3e-07	transcription factor RF2a, putative, expressed	Os04g0495500	OsbZIP36			Q7XUJ7	Q7XUJ7_ORYSJ	unreviewed	OSJNBa0067K08.2 protein	OsJ_15316 OSJNBa0067K08.2	DNA-binding transcription factor activity [GO:0003700]		osa:4336273;	PF00170;
44	LOC_Os01g55150	38.9677	-3.5233	0.536274	4.73e-12	1.03e-10	bZIP transcription factor domain containing protein, expressed	Os01g0756200	OsbZIP06, OsbZIP6			Q5JMK6	BZP06_ORYSJ	reviewed	Basic leucine zipper 6 (OsbZIP06) (bZIP protein 6)	BZIP06 Os01g0756200 LOC_Os01g55150 OsJ_03500 P0503C12.45	nucleus [GO:0005634]; DNA binding [GO:0003677]; DNA-binding transcription factor activity [GO:0003700]; positive regulation of transcription, DNA-templated [GO:0045893]	SUBCELLULAR LOCATION: Nucleus {ECO:0000255|PROSITE-ProRule:PRU00978}.	osa:4325139;	PF00170;
45	LOC_Os02g14910	18.9594	-4.41451	0.81544	1.79e-08	2.3e-07	bZIP transcription factor family protein, putative, expressed	Os02g0247100	OsbZIP19			Q6K3R9	BZP19_ORYSJ	reviewed	Basic leucine zipper 19 (OsbZIP19) (bZIP protein 19)	BZIP19 Os02g0247100 LOC_Os02g14910 OSJNBa0090H18.24	nucleus [GO:0005634]; DNA binding [GO:0003677]; DNA-binding transcription factor activity [GO:0003700]; positive regulation of transcription, DNA-templated [GO:0045893]	SUBCELLULAR LOCATION: Nucleus {ECO:0000255|PROSITE-ProRule:PRU00978}.	osa:4328871;	PF00170;

## Sheet: bZIP_leaves_seedling
Sl No	bZIP	baseMean	log2FoldChange	lfcSE	pvalue	padj	MSU_annotation	RAPD	Oryzabase_symbol	Custom.Annot	References	UNIPROT	Uniprot.Entry.name	Status	Protein.names	Gene.names	Gene.ontology..GO.	Subcellular.location..CC.	Cross.reference..KEGG.	Cross.reference..Pfam.
1	LOC_Os02g09830	36.8543	4.37665	0.700679	2.95e-11	8.11e-10	bZIP transcription factor domain containing protein, expressed	Os02g0191600	OsbZIP16, OsSTA51	NA	NA	Q69M02	Q69M02_ORYSJ	unreviewed	BZIP domain-containing protein	OsJ_05709 P0453H10.10	DNA-binding transcription factor activity [GO:0003700]		osa:4328579;	PF00170;
2	LOC_Os07g08420	7.549	3.62982	1.02296	3.46e-05	0.000256205	bZIP transcription factor domain containing protein, expressed	Os07g0182000	OsbZIP58, OsEnS-92, OsSMF1, SMF1, OsRISBZ1	NA	NA	Q6ZLB0	RSBZ1_ORYSJ	reviewed	bZIP transcription factor RISBZ1 (Rice seed bZIP1) (bZIP transcription factor 58) (OsbZIP58)	RISBZ1 BZIP58 Os07g0182000 LOC_Os07g08420 OJ1014_E09.42 OsJ_23334	nucleus [GO:0005634]; DNA-binding transcription factor activity [GO:0003700]; sequence-specific DNA binding [GO:0043565]; positive regulation of transcription, DNA-templated [GO:0045893]; regulation of starch biosynthetic process [GO:0010581]	SUBCELLULAR LOCATION: Nucleus {ECO:0000255|PROSITE-ProRule:PRU00978, ECO:0000269|PubMed:19473328}.	osa:4342570;	PF00170;PF12498;
3	LOC_Os01g64730	507.27	3.01544	0.295519	1.6e-25	3.19e-23	bZIP transcription factor domain containing protein, expressed	Os01g0867300	OsbZIP12, OsABF1, ABF1, OsOSE2, OSE2	NA	NA	Q0JHF1	BZP12_ORYSJ	reviewed	bZIP transcription factor 12 (OsBZIP12) (Abscisic acid responsive elements-binding factor 1) (ABA responsive element binding factor 1) (ABRE-binding factor 1) (OsABF1)	BZIP12 ABF1 OSE2 Os01g0867300 LOC_Os01g64730 P0677H08.2-1	nucleus [GO:0005634]; DNA-binding transcription factor activity [GO:0003700]; sequence-specific DNA binding [GO:0043565]; abscisic acid-activated signaling pathway [GO:0009738]; positive regulation of abscisic acid-activated signaling pathway [GO:0009789]; positive regulation of response to salt stress [GO:1901002]; positive regulation of response to water deprivation [GO:1902584]; positive regul…	SUBCELLULAR LOCATION: Nucleus {ECO:0000269|PubMed:20039193}.	osa:4325078;	PF00170;
4	LOC_Os01g64000	10.3547	2.29224	0.828451	0.000463507	0.00247527	bZIP transcription factor, putative, expressed	Os01g0859300	OsABI5, OsbZIP10, OsABF1, OREB1, OsABI5-1, OsABI5-2, OsOREB1, OREB1	NA	NA	Q8RZ35	ABI5_ORYSJ	reviewed	bZIP transcription factor ABI5 homolog (OsABI5) (bZIP transcription factor 10) (OsBZIP10)	ABI5 BZIP10 OREB1 Os01g0859300 LOC_Os01g64000 OsJ_04142 P0489B03.11 P0679C12.1	nucleus [GO:0005634]; DNA-binding transcription factor activity [GO:0003700]; protein homodimerization activity [GO:0042803]; sequence-specific DNA binding [GO:0043565]; abscisic acid-activated signaling pathway [GO:0009738]; pollen maturation [GO:0010152]; regulation of transcription, DNA-templated [GO:0006355]; response to abscisic acid [GO:0009737]; response to cold [GO:0009409]; response to s…	SUBCELLULAR LOCATION: Nucleus {ECO:0000255|PROSITE-ProRule:PRU00978, ECO:0000269|PubMed:18236009, ECO:0000269|PubMed:21055780, ECO:0000269|PubMed:22071266, ECO:0000269|PubMed:28000033}.	osa:4325061;	PF00170;
5	LOC_Os01g46970	147.715	2.21933	0.303488	2.85e-14	1.27e-12	transcription factor, putative, expressed	Os01g0658900	OsBZ8, OsbZIP05, OsGBF1, GBF1, OsGBF1a, OsGBF1b	NA	NA	B9EYF3	B9EYF3_ORYSJ	unreviewed	Os01g0658900 protein	Os01g0658900 OsJ_02888	nucleus [GO:0005634]; DNA-binding transcription factor activity [GO:0003700]; sequence-specific DNA binding [GO:0043565]; regulation of transcription, DNA-templated [GO:0006355]		osa:4327165;	PF00170;PF07777;
6	LOC_Os02g52780	619.388	2.20424	0.266772	1.6e-17	1.11e-15	bZIP transcription factor, putative, expressed	Os02g0766700	OsbZIP23, OsAREB1, OsABF2, Osbzip23, OsAREB2, OsZIP23, ZIP23	NA	NA	Q6Z312	BZP23_ORYSJ	reviewed	bZIP transcription factor 23 (OsBZIP23) (ABRE-binding factor 2) (OsABF2) (Abscisic acid responsive elements-binding factor 1) (OsAREB1)	BZIP23 ABF2 AREB1 Os02g0766700 LOC_Os02g52780 OJ1004_A11.20 P0539D10.39	nucleus [GO:0005634]; DNA binding [GO:0003677]; DNA-binding transcription factor activity [GO:0003700]; abscisic acid-activated signaling pathway [GO:0009738]; response to salt stress [GO:0009651]; response to water deprivation [GO:0009414]	SUBCELLULAR LOCATION: Nucleus {ECO:0000255|PROSITE-ProRule:PRU00978, ECO:0000269|PubMed:18931143}.	osa:4330838;	PF00170;
7	LOC_Os06g43870	247.559	2.14545	0.219477	1.72e-23	2.62e-21	expressed protein	NA	NA	NA	NA	B9FQ75	B9FQ75_ORYSJ	unreviewed	Uncharacterized protein	OsJ_22155
8	LOC_Os03g58250	354.531	2.11041	0.34303	8.66e-11	2.18e-09	bZIP transcription factor domain containing protein, expressed	Os03g0796900	OsZIP33, RISBZ2, OsbZIP33	NA	NA	Q7X9A8	RSBZ2_ORYSJ	reviewed	bZIP transcription factor RISBZ2 (Rice endosperm bZIP) (Rice seed bZIP2) (bZIP transcription factor 33) (OsbZIP33)	RISBZ2 BZIP33 REB Os03g0796900 LOC_Os03g58250 OSJNBa0094F01.19	nucleus [GO:0005634]; DNA binding [GO:0003677]; DNA-binding transcription factor activity [GO:0003700]	SUBCELLULAR LOCATION: Nucleus {ECO:0000255|PROSITE-ProRule:PRU00978}.	osa:4334424;	PF00170;PF12498;
9	LOC_Os03g59460	10.2333	2.05952	0.851277	0.00134351	0.00628368	transcription factor, putative, expressed	Os03g0809200	OsbZIP34	NA	NA	Q10BP4	Q10BP4_ORYSJ	unreviewed	BZIP transcription factor family protein	LOC_Os03g59460	DNA-binding transcription factor activity [GO:0003700]			PF00170;
10	LOC_Os05g49420	320.025	1.85287	0.32027	9.72e-10	2.03e-08	transcription factor, putative, expressed	Os05g0569300	OsbZIP45	NA	NA	Q6AUN3	Q6AUN3_ORYSJ	unreviewed	Os05g0569300 protein	Os05g0569300 OSNPB_050569300	nucleus [GO:0005634]; DNA-binding transcription factor activity [GO:0003700]; sequence-specific DNA binding [GO:0043565]; regulation of transcription, DNA-templated [GO:0006355]		osa:4339653;	PF00170;PF07777;
11	LOC_Os07g44950	241.756	1.3027	0.308427	5.57e-06	5.1e-05	bZIP transcription factor domain containing protein, expressed	Os07g0644100	OsbZIP60, bZIP60	NA	NA	Q8LIB3	BZP60_ORYSJ	reviewed	bZIP transcription factor 60 (OsbZIP60)	BZIP60 Os07g0644100 LOC_Os07g44950 OJ1003_C06.133 OJ1458_B07.101	endoplasmic reticulum membrane [GO:0005789]; integral component of membrane [GO:0016021]; nucleus [GO:0005634]; DNA binding [GO:0003677]; DNA-binding transcription factor activity [GO:0003700]; positive regulation of transcription from RNA polymerase II promoter involved in unfolded protein response [GO:0006990]; response to endoplasmic reticulum stress [GO:0034976]	SUBCELLULAR LOCATION: Endoplasmic reticulum membrane {ECO:0000305|PubMed:24153418}; Single-pass membrane protein {ECO:0000255}. Nucleus {ECO:0000255|PROSITE-ProRule:PRU00978, ECO:0000305|PubMed:24153418}. Note=The bZIP domain is translocated into the nucleus in response to ER stress. {ECO:0000305|PubMed:24153418}.	osa:4344086;	PF00170;
12	LOC_Os02g08540	133.255	1.23751	0.262686	6.43e-07	7.34e-06	expressed protein	Os02g0182700	OsDLN45	NA	NA	Q6H7Z8	Q6H7Z8_ORYSJ	unreviewed	Os02g0182700 protein	Os02g0182700 OSNPB_020182700			osa:4328519;
13	LOC_Os03g20310	787.004	1.20566	0.195719	2.05e-10	4.8e-09	transcription factor HBP-1b, putative, expressed	Os03g0318600	OsbZIP28, OsbZIP1, OsNIF1, OsTGA3, TGA3, OsTGA3/OsbZIP08	NA	NA	Q6IVC3	TGA22_ORYSJ	reviewed	Transcription factor TGA2.2 (OsNIF1) (OsbZIP1) (bZIP transcription factor 28) (OsbZIP28)	TGA2.2 Os03g0318600 LOC_Os03g20310 OsJ_10635	nucleus [GO:0005634]; DNA-binding transcription factor activity [GO:0003700]; sequence-specific DNA binding [GO:0043565]; defense response [GO:0006952]; transcription, DNA-templated [GO:0006351]	SUBCELLULAR LOCATION: Nucleus {ECO:0000255|PROSITE-ProRule:PRU00978}.	osa:4332660;	PF00170;PF14144;
14	LOC_Os02g16680	116.838	1.19155	0.24548	3.36e-07	4.11e-06	bZIP transcription factor domain containing protein, expressed	Os02g0266800	OsbZIP20, RITA-1, RISBZ3	NA	NA	Q6ETX0	RSBZ3_ORYSJ	reviewed	bZIP transcription factor RISBZ3 (Rice seed bZIP3) (bZIP transcription factor 20) (OsbZIP20)	RISBZ3 BZIP20 RITA-1 Os02g0266800 LOC_Os02g16680 OsJ_06179 P0006C08.38	nucleus [GO:0005634]; DNA binding [GO:0003677]; DNA-binding transcription factor activity [GO:0003700]	SUBCELLULAR LOCATION: Nucleus {ECO:0000255|PROSITE-ProRule:PRU00978}.	osa:4328963;	PF00170;
15	LOC_Os08g36790	112.723	1.17484	0.281949	8.58e-06	7.47e-05	bZIP transcription factor, putative, expressed	Os08g0472000	OsbZIP66, OsABF5, Osbzip66, OsTRAB1, bZIP66, ABF5	NA	NA	Q6ZDF3	TRAB1_ORYSJ	reviewed	bZIP transcription factor TRAB1 (Protein ABA RESPONSIVE ELEMENT 1)	TRAB1 ABA1 Os08g0472000 LOC_Os08g36790 P0013B04.7	nucleus [GO:0005634]; DNA-binding transcription factor activity [GO:0003700]; transcription regulatory region DNA binding [GO:0044212]; abscisic acid-activated signaling pathway [GO:0009738]; regulation of transcription, DNA-templated [GO:0006355]	SUBCELLULAR LOCATION: Nucleus {ECO:0000305}.	osa:4345807;	PF00170;
16	LOC_Os08g43090	209.026	1.13753	0.262496	4.29e-06	4.04e-05	bZIP family transcription factor, putative, expressed	Os08g0543900	OsbZIP68	NA	NA	A0A0P0XJA4	A0A0P0XJA4_ORYSJ	unreviewed	Os08g0543900 protein	Os08g0543900	DNA-binding transcription factor activity [GO:0003700]		osa:4346208;	PF00170;
17	LOC_Os01g59350	112.735	1.06385	0.323394	0.000304911	0.00172357	transcription factor, putative, expressed	Os01g0808100	OsbZIP08, OsbZIP8, OsTGA2, TGA2, OsTGA2/OsbZIP28	NA	NA	Q6IVC2	TGAL1_ORYSJ	reviewed	Transcription factor TGAL1 (OsNIF4) (bZIP transcription factor 8) (OsbZIP08)	TGAL1 TGAL2 Os01g0808100 LOC_Os01g59350	nucleus [GO:0005634]; DNA-binding transcription factor activity [GO:0003700]; sequence-specific DNA binding [GO:0043565]; defense response [GO:0006952]; transcription, DNA-templated [GO:0006351]	SUBCELLULAR LOCATION: Nucleus {ECO:0000255|PROSITE-ProRule:PRU00978}.	osa:9266109;	PF00170;PF14144;
18	LOC_Os02g10860	87.7852	1.00615	0.437511	0.00659103	0.0242166	bZIP transcription factor domain containing protein, expressed	Os02g0203000	OsbZIP18	NA	NA	Q0E2Y8	Q0E2Y8_ORYSJ	unreviewed	Os02g0203000 protein	Os02g0203000	carbohydrate binding [GO:0030246]; DNA-binding transcription factor activity [GO:0003700]			PF00170;PF00139;
19	LOC_Os02g10860	87.7852	1.00615	0.437511	0.00659103	0.0242166	bZIP transcription factor domain containing protein, expressed	Os02g0202950		NA	NA	Q0E2Y8	Q0E2Y8_ORYSJ	unreviewed	Os02g0203000 protein	Os02g0203000	carbohydrate binding [GO:0030246]; DNA-binding transcription factor activity [GO:0003700]			PF00170;PF00139;
20	LOC_Os05g34050	496.805	0.980247	0.180571	2.18e-08	3.45e-07	bZIP transcription factor domain containing protein, expressed	Os05g0411300	OsbZIP39, bZIP39, DLN138, OsDLN138	NA	NA	Q6AU90	BZP39_ORYSJ	reviewed	bZIP transcription factor 39 (OsbZIP39)	BZIP39 Os05g0411300 LOC_Os05g34050 OsJ_18536 P0668F02.11	endoplasmic reticulum membrane [GO:0005789]; integral component of membrane [GO:0016021]; nucleus [GO:0005634]; DNA binding [GO:0003677]; DNA-binding transcription factor activity [GO:0003700]; positive regulation of transcription from RNA polymerase II promoter involved in unfolded protein response [GO:0006990]; response to endoplasmic reticulum stress [GO:0034976]	SUBCELLULAR LOCATION: Endoplasmic reticulum membrane {ECO:0000269|PubMed:22084314}; Single-pass membrane protein {ECO:0000255}. Nucleus {ECO:0000255|PROSITE-ProRule:PRU00978, ECO:0000269|PubMed:22084314}. Note=The bZIP domain is translocated into the nucleus in response to ER stress. {ECO:0000269|PubMed:22084314}.	osa:4338781;	PF00170;
21	LOC_Os05g36160	93.9229	0.81127	0.256929	0.000762003	0.00382749	G-box-binding factor 4, putative, expressed	Os05g0437700	OsbZIP40	NA	NA	Q75HX9	Q75HX9_ORYSJ	unreviewed	Os05g0437700 protein	Os05g0437700 OSNPB_050437700	nucleus [GO:0005634]; DNA-binding transcription factor activity [GO:0003700]			PF00170;
22	LOC_Os05g03860	705.196	0.77568	0.277247	0.00255739	0.0109107	CPuORF3 - conserved peptide uORF-containing transcript, expressed	Os05g0129300	Lip19, lip19, OsbZIP38	NA	NA	Q688Q7	Q688Q7_ORYSJ	unreviewed	BZIP transcription factor (Os05g0129300 protein) (cDNA clone:001-042-G08, full insert sequence) (cDNA clone:001-102-F02, full insert sequence) (cDNA clone:J013002D17, full insert sequence)	Os05g0129300 OSNPB_050129300	nucleus [GO:0005634]; DNA-binding transcription factor activity [GO:0003700]; protein heterodimerization activity [GO:0046982]; sequence-specific DNA binding [GO:0043565]; transcription regulatory region DNA binding [GO:0044212]; cellular response to starvation [GO:0009267]; hypotonic response [GO:0006971]; positive regulation of seed maturation [GO:2000693]; positive regulation of transcription,…		osa:4337699;	PF00170;
23	LOC_Os12g37410	1028.95	0.707502	0.192851	0.000144977	0.00089622	CPuORF5 - conserved peptide uORF-containing transcript, expressed	Os12g0560900	OsOBF1, OsbZIP87	NA	NA	Q4H4C4	Q4H4C4_ORYSJ	unreviewed	BZIP protein (Ocs-element binding factor 1, putative, expressed)	OsOBF1 LOC_Os12g37410	DNA-binding transcription factor activity [GO:0003700]		osa:9271102;	PF00170;
24	LOC_Os09g34060	205.889	0.666464	0.192235	0.000317551	0.00178542	transcription factor RF2a, putative, expressed	Os09g0516200	RF2a, OsbZIP75	NA	NA	Q69IL4	RF2A_ORYSJ	reviewed	Transcription factor RF2a	RF2a Os09g0516200 LOC_Os09g34060 OSJNBb0034B12.8 P0450E05.33	nucleus [GO:0005634]; DNA binding [GO:0003677]; DNA-binding transcription factor activity [GO:0003700]	SUBCELLULAR LOCATION: Nucleus {ECO:0000255|PROSITE-ProRule:PRU00978, ECO:0000269|PubMed:9311985}.	osa:4347578;	PF00170;
25	LOC_Os12g13170	490.166	0.62095	0.173874	0.000227253	0.00133036	transcription factor, putative, expressed	Os12g0233800	OsbZIP86, OsZIP-1a	NA	NA	Q2QVD7	Q2QVD7_ORYSJ	unreviewed	BZIP transcription factor family protein, expressed	LOC_Os12g13170	DNA-binding transcription factor activity [GO:0003700]			PF00170;PF07777;
26	LOC_Os12g13170	490.166	0.62095	0.173874	0.000227253	0.00133036	transcription factor, putative, expressed	Os12g0233800	OsbZIP86, OsZIP-1a	NA	NA	Q2QVD6	Q2QVD6_ORYSJ	unreviewed	BZIP transcription factor family protein, expressed (Os12g0233800 protein) (cDNA clone:J013039C04, full insert sequence) (cDNA clone:J023123F07, full insert sequence)	LOC_Os12g13170 Os12g0233800 OSNPB_120233800	nucleus [GO:0005634]; sequence-specific DNA binding [GO:0043565]; regulation of transcription, DNA-templated [GO:0006355]			PF07777;
27	LOC_Os05g41540	168.464	0.45622	0.187762	0.0118254	0.0395005	bZIP transcription factor domain containing protein, expressed	Os05g0495200	OsbZIP44	NA	NA	Q65X73	Q65X73_ORYSJ	unreviewed	Os05g0495200 protein (cDNA clone:002-110-E11, full insert sequence) (cDNA clone:J023018E07, full insert sequence)	Os05g0495200 OSNPB_050495200	DNA-binding transcription factor activity [GO:0003700]		osa:4339196;	PF07716;
28	LOC_Os12g06520	238.327	0.406557	0.160863	0.0095128	0.0329271	bZIP transcription factor domain containing protein, expressed	Os12g0162500	OsbZIP84, BZIP84	NA	NA	Q2QXC3	Q2QXC3_ORYSJ	unreviewed	BZIP transcriptional activator RSG, putative, expressed (Os12g0162500 protein)	LOC_Os12g06520 Os12g0162500 OSNPB_120162500	nucleus [GO:0005634]; DNA-binding transcription factor activity [GO:0003700]		osa:4351576;	PF00170;
29	LOC_Os09g13570	580.046	-0.445975	0.188784	0.0141186	0.0456861	CPuORF2 - conserved peptide uORF-containing transcript, expressed	Os09g0306400	OsbZIP71, DLN221, OsDLN221, DLN222, OsDLN222	NA	NA	Q69KN5	Q69KN5_ORYSJ	unreviewed	Os09g0306400 protein (cDNA clone:J013000L18, full insert sequence) (cDNA clone:J013001A19, full insert sequence) (cDNA clone:J023058F04, full insert sequence)	Os09g0306400 OSNPB_090306400	nucleus [GO:0005634]; DNA-binding transcription factor activity [GO:0003700]; sequence-specific DNA binding [GO:0043565]; transcription regulatory region DNA binding [GO:0044212]; positive regulation of transcription, DNA-templated [GO:0045893]		osa:4346672;	PF00170;
30	LOC_Os04g54474	157.885	-0.53195	0.232254	0.0153159	0.0488507	transcription factor, putative, expressed	Os04g0637000	OsTGAP1, TGAP1, OsbZIP37	NA	NA	A0A0P0WFC8	TGAL6_ORYSJ	reviewed	Transcription factor TGAL6 (bZIP transcription factor 37) (OsbZIP37)	TGAL6 Os04g0637000 LOC_Os04g54474 OsJ_16330 OSJNBb0034I13.13	nucleus [GO:0005634]; DNA-binding transcription factor activity [GO:0003700]; sequence-specific DNA binding [GO:0043565]; defense response [GO:0006952]; transcription, DNA-templated [GO:0006351]	SUBCELLULAR LOCATION: Nucleus {ECO:0000255|PROSITE-ProRule:PRU00978}.	osa:9270267;	PF00170;PF14144;
31	LOC_Os02g03580	336.198	-1.02646	0.211019	3.97e-07	4.76e-06	transcription factor, putative, expressed	Os02g0128200	OsbZIP13	NA	NA	Q0E4A6	Q0E4A6_ORYSJ	unreviewed	Os02g0128200 protein (Putative transcription factor HBP-1a)	Os02g0128200 OsJ_05225 P0482F12.32 P0576F08.5	nucleus [GO:0005634]; DNA-binding transcription factor activity [GO:0003700]; sequence-specific DNA binding [GO:0043565]; regulation of transcription, DNA-templated [GO:0006355]		osa:4328173;	PF00170;PF07777;
32	LOC_Os06g41100	23.2175	-1.02801	0.453639	0.00708109	0.0257294	transcription factor, putative, expressed	Os06g0614100	OsbZIP49	NA	NA	Q69T21	TGAL8_ORYSJ	reviewed	Transcription factor TGAL8 (bZIP transcription factor 49) (OsbZIP49)	TGAL8 Os06g0614100 LOC_Os06g41100 OsJ_21969 P0417G12.29 P0691E09.5	nucleus [GO:0005634]; DNA-binding transcription factor activity [GO:0003700]; sequence-specific DNA binding [GO:0043565]; defense response [GO:0006952]; transcription, DNA-templated [GO:0006351]	SUBCELLULAR LOCATION: Nucleus {ECO:0000255|PROSITE-ProRule:PRU00978}.	osa:4341530;	PF00170;PF14144;
33	LOC_Os01g59760	46.3822	-1.19279	0.278151	4.97e-06	4.61e-05	bZIP transcription factor, putative, expressed	Os01g0813100	OsbZIP09, OsbZIP9, OsABF6, ABF6, HBF2	NA	NA	B9ETU8	B9ETU8_ORYSJ	unreviewed	BZIP domain-containing protein	OsJ_03842	DNA-binding transcription factor activity [GO:0003700]		osa:4327590;	PF00170;
34	LOC_Os01g58760	38.7704	-1.71322	0.332941	4.07e-08	6.09e-07	bZIP transcription factor domain containing protein, expressed	Os01g0801901	OsbZIP07, OsbZIP7	NA	NA	A2ZYR0	A2ZYR0_ORYSJ	unreviewed	BZIP domain-containing protein	OsJ_03780	DNA-binding transcription factor activity [GO:0003700]			PF07716;
35	LOC_Os02g03960	131.966	-1.71391	0.243661	3.13e-13	1.21e-11	CPuORF1 - conserved peptide uORF-containing transcript, expressed	Os02g0132500	OsbZIP14	NA	NA	A3A2U4	A3A2U4_ORYSJ	unreviewed	Os02g0132500 protein	Os02g0132500 OsJ_05262	nucleus [GO:0005634]; DNA-binding transcription factor activity [GO:0003700]; sequence-specific DNA binding [GO:0043565]; transcription regulatory region DNA binding [GO:0044212]; positive regulation of transcription, DNA-templated [GO:0045893]		osa:4328205;	PF00170;
36	LOC_Os12g40920	371.936	-1.92509	0.369027	2.18e-08	3.45e-07	bZIP transcription factor domain containing protein, expressed	Os12g0601800	OsbZIP88	NA	NA	Q2QMJ7	Q2QMJ7_ORYSJ	unreviewed	BZIP transcription factor family protein, expressed	LOC_Os12g40920	DNA-binding transcription factor activity [GO:0003700]			PF00170;PF12498;
37	LOC_Os12g40920	371.936	-1.92509	0.369027	2.18e-08	3.45e-07	bZIP transcription factor domain containing protein, expressed	Os12g0601800	OsbZIP88	NA	NA	Q2QMJ8	Q2QMJ8_ORYSJ	unreviewed	BZIP transcription factor family protein, expressed	LOC_Os12g40920	DNA-binding transcription factor activity [GO:0003700]			PF00170;
38	LOC_Os12g40920	371.936	-1.92509	0.369027	2.18e-08	3.45e-07	bZIP transcription factor domain containing protein, expressed	Os12g0601800	OsbZIP88	NA	NA	A0A0N7KUB6	A0A0N7KUB6_ORYSJ	unreviewed	Os12g0601800 protein	Os12g0601800 OSNPB_120601800	DNA-binding transcription factor activity [GO:0003700]			PF00170;PF12498;

## Sheet: bZIP_leaves_mature
Sl No	bZIP	baseMean	log2FoldChange	lfcSE	pvalue	padj	MSU_annotation	RAPD	Oryzabase_symbol	Custom.Annot	References	UNIPROT	Uniprot.Entry.name	Status	Protein.names	Gene.names	Gene.ontology..GO.	Subcellular.location..CC.	Cross.reference..KEGG.	Cross.reference..Pfam.
1	LOC_Os01g64730	507.27	3.0588	0.306829	2.23e-24	8.41e-23	bZIP transcription factor domain containing protein, expressed	Os01g0867300	OsbZIP12, OsABF1, ABF1, OsOSE2, OSE2	NA	NA	Q0JHF1	BZP12_ORYSJ	reviewed	bZIP transcription factor 12 (OsBZIP12) (Abscisic acid responsive elements-binding factor 1) (ABA responsive element binding factor 1) (ABRE-binding factor 1) (OsABF1)	BZIP12 ABF1 OSE2 Os01g0867300 LOC_Os01g64730 P0677H08.2-1	nucleus [GO:0005634]; DNA-binding transcription factor activity [GO:0003700]; sequence-specific DNA binding [GO:0043565]; abscisic acid-activated signaling pathway [GO:0009738]; positive regulation of abscisic acid-activated signaling pathway [GO:0009789]; positive regulation of response to salt stress [GO:1901002]; positive regulation of response to water deprivation [GO:1902584]; positive regul…	SUBCELLULAR LOCATION: Nucleus {ECO:0000269|PubMed:20039193}.	osa:4325078;	PF00170;
2	LOC_Os07g08420	7.549	1.99344	1.45703	0.0199733	0.0450157	bZIP transcription factor domain containing protein, expressed	Os07g0182000	OsbZIP58, OsEnS-92, OsSMF1, SMF1, OsRISBZ1	NA	NA	Q6ZLB0	RSBZ1_ORYSJ	reviewed	bZIP transcription factor RISBZ1 (Rice seed bZIP1) (bZIP transcription factor 58) (OsbZIP58)	RISBZ1 BZIP58 Os07g0182000 LOC_Os07g08420 OJ1014_E09.42 OsJ_23334	nucleus [GO:0005634]; DNA-binding transcription factor activity [GO:0003700]; sequence-specific DNA binding [GO:0043565]; positive regulation of transcription, DNA-templated [GO:0045893]; regulation of starch biosynthetic process [GO:0010581]	SUBCELLULAR LOCATION: Nucleus {ECO:0000255|PROSITE-ProRule:PRU00978, ECO:0000269|PubMed:19473328}.	osa:4342570;	PF00170;PF12498;
3	LOC_Os03g59460	10.2333	1.9458	0.918302	0.00636948	0.0166519	transcription factor, putative, expressed	Os03g0809200	OsbZIP34	NA	NA	Q10BP4	Q10BP4_ORYSJ	unreviewed	BZIP transcription factor family protein	LOC_Os03g59460	DNA-binding transcription factor activity [GO:0003700]			PF00170;
4	LOC_Os01g59350	112.735	1.72756	0.315989	1.31e-08	1.01e-07	transcription factor, putative, expressed	Os01g0808100	OsbZIP08, OsbZIP8, OsTGA2, TGA2, OsTGA2/OsbZIP28	NA	NA	Q6IVC2	TGAL1_ORYSJ	reviewed	Transcription factor TGAL1 (OsNIF4) (bZIP transcription factor 8) (OsbZIP08)	TGAL1 TGAL2 Os01g0808100 LOC_Os01g59350	nucleus [GO:0005634]; DNA-binding transcription factor activity [GO:0003700]; sequence-specific DNA binding [GO:0043565]; defense response [GO:0006952]; transcription, DNA-templated [GO:0006351]	SUBCELLULAR LOCATION: Nucleus {ECO:0000255|PROSITE-ProRule:PRU00978}.	osa:9266109;	PF00170;PF14144;
5	LOC_Os09g28310	394.689	1.63613	0.30061	1.54e-08	1.18e-07	bZIP transcription factor, putative, expressed	Os09g0456200	OsbZIP72, OsAREB2, OsABF4, Osbzip72, OsABI5, ABI5	NA	NA	Q67TQ5	Q67TQ5_ORYSJ	unreviewed	Os09g0456200 protein (cDNA clone:J013049N23, full insert sequence)	Os09g0456200 OSNPB_090456200	nucleus [GO:0005634]; DNA-binding transcription factor activity [GO:0003700]		osa:4347257;	PF00170;
6	LOC_Os02g08540	133.255	1.47256	0.270419	1.85e-08	1.39e-07	expressed protein	Os02g0182700	OsDLN45	NA	NA	Q6H7Z8	Q6H7Z8_ORYSJ	unreviewed	Os02g0182700 protein	Os02g0182700 OSNPB_020182700			osa:4328519;
7	LOC_Os01g36220	47.4597	1.46654	0.40721	0.000108771	0.000434519	bZIP transcription factor domain containing protein, expressed	Os01g0542700	OsbZIP04, OsbZIP4	NA	NA	A0A0P0V421	A0A0P0V421_ORYSJ	unreviewed	Os01g0542700 protein	Os01g0542700 OSJNBa0062A24.41 OSJNBa0065J17.8	nucleus [GO:0005634]; DNA-binding transcription factor activity [GO:0003700]; sequence-specific DNA binding [GO:0043565]; transcription regulatory region DNA binding [GO:0044212]; positive regulation of transcription, DNA-templated [GO:0045893]		osa:4326871;	PF00170;
8	LOC_Os02g49560	34.0704	1.38668	0.383091	0.000109321	0.000436352	bZIP transcription factor domain containing protein, expressed	Os02g0728001	OsbZIP22	NA	NA	A3AAZ0	A3AAZ0_ORYSJ	unreviewed	Os02g0728001 protein	Os02g0728001 OSNPB_020728001	DNA-binding transcription factor activity [GO:0003700]		osa:107275625;	PF00170;
9	LOC_Os06g41770	103.219	1.37804	0.212592	3.53e-11	3.79e-10	bZIP transcription factor domain containing protein, expressed	Os06g0622700	OsbZIP60, bZIP50, OsbZIP50, OsbZIP74, bZIP74, OsbZIP50-S	NA	NA	Q69XV0	BZP50_ORYSJ	reviewed	bZIP transcription factor 50 (OsbZIP50) (OsBZIP74)	BZIP50 BZIP60 BZIP74 Os06g0622700 LOC_Os06g41770 OsJ_22012 P0040H10.41	endoplasmic reticulum membrane [GO:0005789]; integral component of membrane [GO:0016021]; nucleus [GO:0005634]; DNA binding [GO:0003677]; DNA-binding transcription factor activity [GO:0003700]; positive regulation of transcription from RNA polymerase II promoter involved in unfolded protein response [GO:0006990]; response to chitin [GO:0010200]; response to endoplasmic reticulum stress [GO:003497…	SUBCELLULAR LOCATION: [Isoform 1]: Endoplasmic reticulum membrane {ECO:0000269|PubMed:22050533, ECO:0000269|PubMed:22199238}; Single-pass membrane protein {ECO:0000255}.; SUBCELLULAR LOCATION: [Isoform 2]: Nucleus {ECO:0000269|PubMed:22050533, ECO:0000269|PubMed:22199238}. Note=The bZIP domain is translocated into the nucleus in response to ER stress. {ECO:0000269|PubMed:22050533, ECO:0000269|Pub…	osa:4341554;	PF00170;
10	LOC_Os06g41100	23.2175	1.0876	0.420522	0.00475066	0.0128724	transcription factor, putative, expressed	Os06g0614100	OsbZIP49	NA	NA	Q69T21	TGAL8_ORYSJ	reviewed	Transcription factor TGAL8 (bZIP transcription factor 49) (OsbZIP49)	TGAL8 Os06g0614100 LOC_Os06g41100 OsJ_21969 P0417G12.29 P0691E09.5	nucleus [GO:0005634]; DNA-binding transcription factor activity [GO:0003700]; sequence-specific DNA binding [GO:0043565]; defense response [GO:0006952]; transcription, DNA-templated [GO:0006351]	SUBCELLULAR LOCATION: Nucleus {ECO:0000255|PROSITE-ProRule:PRU00978}.	osa:4341530;	PF00170;PF14144;
11	LOC_Os05g34050	496.805	1.07342	0.188537	6.36e-09	5.12e-08	bZIP transcription factor domain containing protein, expressed	Os05g0411300	OsbZIP39, bZIP39, DLN138, OsDLN138	NA	NA	Q6AU90	BZP39_ORYSJ	reviewed	bZIP transcription factor 39 (OsbZIP39)	BZIP39 Os05g0411300 LOC_Os05g34050 OsJ_18536 P0668F02.11	endoplasmic reticulum membrane [GO:0005789]; integral component of membrane [GO:0016021]; nucleus [GO:0005634]; DNA binding [GO:0003677]; DNA-binding transcription factor activity [GO:0003700]; positive regulation of transcription from RNA polymerase II promoter involved in unfolded protein response [GO:0006990]; response to endoplasmic reticulum stress [GO:0034976]	SUBCELLULAR LOCATION: Endoplasmic reticulum membrane {ECO:0000269|PubMed:22084314}; Single-pass membrane protein {ECO:0000255}. Nucleus {ECO:0000255|PROSITE-ProRule:PRU00978, ECO:0000269|PubMed:22084314}. Note=The bZIP domain is translocated into the nucleus in response to ER stress. {ECO:0000269|PubMed:22084314}.	osa:4338781;	PF00170;
12	LOC_Os07g44950	241.756	1.03314	0.315596	0.00057607	0.00196715	bZIP transcription factor domain containing protein, expressed	Os07g0644100	OsbZIP60, bZIP60	NA	NA	Q8LIB3	BZP60_ORYSJ	reviewed	bZIP transcription factor 60 (OsbZIP60)	BZIP60 Os07g0644100 LOC_Os07g44950 OJ1003_C06.133 OJ1458_B07.101	endoplasmic reticulum membrane [GO:0005789]; integral component of membrane [GO:0016021]; nucleus [GO:0005634]; DNA binding [GO:0003677]; DNA-binding transcription factor activity [GO:0003700]; positive regulation of transcription from RNA polymerase II promoter involved in unfolded protein response [GO:0006990]; response to endoplasmic reticulum stress [GO:0034976]	SUBCELLULAR LOCATION: Endoplasmic reticulum membrane {ECO:0000305|PubMed:24153418}; Single-pass membrane protein {ECO:0000255}. Nucleus {ECO:0000255|PROSITE-ProRule:PRU00978, ECO:0000305|PubMed:24153418}. Note=The bZIP domain is translocated into the nucleus in response to ER stress. {ECO:0000305|PubMed:24153418}.	osa:4344086;	PF00170;
13	LOC_Os07g48820	869.43	1.01823	0.220974	2.32e-06	1.25e-05	transcription factor, putative, expressed	Os07g0687700	OsbZIP63	NA	NA	Q7X993	TGA21_ORYSJ	reviewed	Transcription factor TGA2.1 (OsNIF2) (bZIP transcription factor 63) (OsbZIP63)	TGA2.1 Os07g0687700 LOC_Os07g48820 OJ1150_E04.124 OJ1165_F02.101 OsJ_25648	nucleus [GO:0005634]; DNA binding [GO:0003677]; DNA-binding transcription factor activity [GO:0003700]; sequence-specific DNA binding [GO:0043565]; defense response to bacterium [GO:0042742]; positive regulation of transcription, DNA-templated [GO:0045893]; transcription, DNA-templated [GO:0006351]	SUBCELLULAR LOCATION: Nucleus {ECO:0000255|PROSITE-ProRule:PRU00978}.	osa:4344349;	PF00170;PF14144;
14	LOC_Os06g50310	435.075	0.828496	0.167227	4.74e-07	2.87e-06	E2F-related protein, putative, expressed	Os06g0716800	OsbZIP53, APIP5	NA	NA	Q5Z8P6	Q5Z8P6_ORYSJ	unreviewed	Os06g0716800 protein (cDNA clone:001-016-A09, full insert sequence) (cDNA clone:J023099K10, full insert sequence)	Os06g0716800 OSNPB_060716800	DNA-binding transcription factor activity [GO:0003700]		osa:4342078;	PF07716;
15	LOC_Os03g20310	787.004	0.757046	0.198021	9.63e-05	0.000388872	transcription factor HBP-1b, putative, expressed	Os03g0318600	OsbZIP28, OsbZIP1, OsNIF1, OsTGA3, TGA3, OsTGA3/OsbZIP08	NA	NA	Q6IVC3	TGA22_ORYSJ	reviewed	Transcription factor TGA2.2 (OsNIF1) (OsbZIP1) (bZIP transcription factor 28) (OsbZIP28)	TGA2.2 Os03g0318600 LOC_Os03g20310 OsJ_10635	nucleus [GO:0005634]; DNA-binding transcription factor activity [GO:0003700]; sequence-specific DNA binding [GO:0043565]; defense response [GO:0006952]; transcription, DNA-templated [GO:0006351]	SUBCELLULAR LOCATION: Nucleus {ECO:0000255|PROSITE-ProRule:PRU00978}.	osa:4332660;	PF00170;PF14144;
16	LOC_Os12g13170	490.166	0.736021	0.177129	2.45e-05	0.000110526	transcription factor, putative, expressed	Os12g0233800	OsbZIP86, OsZIP-1a	NA	NA	Q2QVD6	Q2QVD6_ORYSJ	unreviewed	BZIP transcription factor family protein, expressed (Os12g0233800 protein) (cDNA clone:J013039C04, full insert sequence) (cDNA clone:J023123F07, full insert sequence)	LOC_Os12g13170 Os12g0233800 OSNPB_120233800	nucleus [GO:0005634]; sequence-specific DNA binding [GO:0043565]; regulation of transcription, DNA-templated [GO:0006355]			PF07777;
17	LOC_Os12g13170	490.166	0.736021	0.177129	2.45e-05	0.000110526	transcription factor, putative, expressed	Os12g0233800	OsbZIP86, OsZIP-1a	NA	NA	Q2QVD7	Q2QVD7_ORYSJ	unreviewed	BZIP transcription factor family protein, expressed	LOC_Os12g13170	DNA-binding transcription factor activity [GO:0003700]			PF00170;PF07777;
18	LOC_Os09g34060	205.889	0.609335	0.205845	0.00250045	0.00732433	transcription factor RF2a, putative, expressed	Os09g0516200	RF2a, OsbZIP75	NA	NA	Q69IL4	RF2A_ORYSJ	reviewed	Transcription factor RF2a	RF2a Os09g0516200 LOC_Os09g34060 OSJNBb0034B12.8 P0450E05.33	nucleus [GO:0005634]; DNA binding [GO:0003677]; DNA-binding transcription factor activity [GO:0003700]	SUBCELLULAR LOCATION: Nucleus {ECO:0000255|PROSITE-ProRule:PRU00978, ECO:0000269|PubMed:9311985}.	osa:4347578;	PF00170;
19	LOC_Os05g41540	168.464	-0.472128	0.196597	0.0142924	0.0337967	bZIP transcription factor domain containing protein, expressed	Os05g0495200	OsbZIP44	NA	NA	Q65X73	Q65X73_ORYSJ	unreviewed	Os05g0495200 protein (cDNA clone:002-110-E11, full insert sequence) (cDNA clone:J023018E07, full insert sequence)	Os05g0495200 OSNPB_050495200	DNA-binding transcription factor activity [GO:0003700]		osa:4339196;	PF07716;
20	LOC_Os06g43870	247.559	-0.59903	0.214849	0.00423591	0.0116288	expressed protein	NA	NA	NA	NA	B9FQ75	B9FQ75_ORYSJ	unreviewed	Uncharacterized protein	OsJ_22155
21	LOC_Os03g58250	354.531	-0.764662	0.334876	0.0150993	0.0354202	bZIP transcription factor domain containing protein, expressed	Os03g0796900	OsZIP33, RISBZ2, OsbZIP33	NA	NA	Q7X9A8	RSBZ2_ORYSJ	reviewed	bZIP transcription factor RISBZ2 (Rice endosperm bZIP) (Rice seed bZIP2) (bZIP transcription factor 33) (OsbZIP33)	RISBZ2 BZIP33 REB Os03g0796900 LOC_Os03g58250 OSJNBa0094F01.19	nucleus [GO:0005634]; DNA binding [GO:0003677]; DNA-binding transcription factor activity [GO:0003700]	SUBCELLULAR LOCATION: Nucleus {ECO:0000255|PROSITE-ProRule:PRU00978}.	osa:4334424;	PF00170;PF12498;
22	LOC_Os02g07840	70.6474	-0.816285	0.259718	0.0011271	0.00361084	bZIP transcription factor domain containing protein, expressed	Os02g0175100	OsbZIP15	NA	NA	Q6H500	RSBZ4_ORYSJ	reviewed	bZIP transcription factor RISBZ4 (Rice seed bZIP4) (bZIP transcription factor 15) (OsbZIP15)	RISBZ4 BZIP15 RITA-2 Os02g0175100 LOC_Os02g07840 OJ1077_E05.6 OsJ_05580 OSJNBa0073A21.32	nucleus [GO:0005634]; DNA binding [GO:0003677]; DNA-binding transcription factor activity [GO:0003700]	SUBCELLULAR LOCATION: Nucleus {ECO:0000255|PROSITE-ProRule:PRU00978}.	osa:4328469;	PF00170;
23	LOC_Os02g16680	116.838	-0.849893	0.265784	0.000891624	0.00292203	bZIP transcription factor domain containing protein, expressed	Os02g0266800	OsbZIP20, RITA-1, RISBZ3	NA	NA	Q6ETX0	RSBZ3_ORYSJ	reviewed	bZIP transcription factor RISBZ3 (Rice seed bZIP3) (bZIP transcription factor 20) (OsbZIP20)	RISBZ3 BZIP20 RITA-1 Os02g0266800 LOC_Os02g16680 OsJ_06179 P0006C08.38	nucleus [GO:0005634]; DNA binding [GO:0003677]; DNA-binding transcription factor activity [GO:0003700]	SUBCELLULAR LOCATION: Nucleus {ECO:0000255|PROSITE-ProRule:PRU00978}.	osa:4328963;	PF00170;
24	LOC_Os08g07970	60.08	-0.932552	0.32276	0.00228248	0.00676921	transcription factor, putative, expressed	Os08g0176900	OsbZIP64	NA	NA	Q6ZBS8	TGL10_ORYSJ	reviewed	Transcription factor TGAL10 (bZIP transcription factor 64) (OsbZIP64)	TGAL10 Os08g0176900 LOC_Os08g07970 OJ1120_C08.7 P0583B06.15	nucleus [GO:0005634]; DNA-binding transcription factor activity [GO:0003700]; sequence-specific DNA binding [GO:0043565]; defense response [GO:0006952]; transcription, DNA-templated [GO:0006351]	SUBCELLULAR LOCATION: Nucleus {ECO:0000255|PROSITE-ProRule:PRU00978}.		PF00170;PF14144;
25	LOC_Os04g54474	157.885	-0.942768	0.228361	2.21e-05	0.000100436	transcription factor, putative, expressed	Os04g0637000	OsTGAP1, TGAP1, OsbZIP37	NA	NA	A0A0P0WFC8	TGAL6_ORYSJ	reviewed	Transcription factor TGAL6 (bZIP transcription factor 37) (OsbZIP37)	TGAL6 Os04g0637000 LOC_Os04g54474 OsJ_16330 OSJNBb0034I13.13	nucleus [GO:0005634]; DNA-binding transcription factor activity [GO:0003700]; sequence-specific DNA binding [GO:0043565]; defense response [GO:0006952]; transcription, DNA-templated [GO:0006351]	SUBCELLULAR LOCATION: Nucleus {ECO:0000255|PROSITE-ProRule:PRU00978}.	osa:9270267;	PF00170;PF14144;
26	LOC_Os05g36160	93.9229	-1.05557	0.247378	1.09e-05	5.23e-05	G-box-binding factor 4, putative, expressed	Os05g0437700	OsbZIP40	NA	NA	Q75HX9	Q75HX9_ORYSJ	unreviewed	Os05g0437700 protein	Os05g0437700 OSNPB_050437700	nucleus [GO:0005634]; DNA-binding transcription factor activity [GO:0003700]			PF00170;
27	LOC_Os09g13570	580.046	-1.06869	0.194787	2.15e-08	1.61e-07	CPuORF2 - conserved peptide uORF-containing transcript, expressed	Os09g0306400	OsbZIP71, DLN221, OsDLN221, DLN222, OsDLN222	NA	NA	Q69KN5	Q69KN5_ORYSJ	unreviewed	Os09g0306400 protein (cDNA clone:J013000L18, full insert sequence) (cDNA clone:J013001A19, full insert sequence) (cDNA clone:J023058F04, full insert sequence)	Os09g0306400 OSNPB_090306400	nucleus [GO:0005634]; DNA-binding transcription factor activity [GO:0003700]; sequence-specific DNA binding [GO:0043565]; transcription regulatory region DNA binding [GO:0044212]; positive regulation of transcription, DNA-templated [GO:0045893]		osa:4346672;	PF00170;
28	LOC_Os12g37410	1028.95	-1.08444	0.190196	6.04e-09	4.87e-08	CPuORF5 - conserved peptide uORF-containing transcript, expressed	Os12g0560900	OsOBF1, OsbZIP87	NA	NA	Q4H4C4	Q4H4C4_ORYSJ	unreviewed	BZIP protein (Ocs-element binding factor 1, putative, expressed)	OsOBF1 LOC_Os12g37410	DNA-binding transcription factor activity [GO:0003700]		osa:9271102;	PF00170;
29	LOC_Os05g49420	320.025	-1.24229	0.316669	3.67e-05	0.000161176	transcription factor, putative, expressed	Os05g0569300	OsbZIP45	NA	NA	Q6AUN3	Q6AUN3_ORYSJ	unreviewed	Os05g0569300 protein	Os05g0569300 OSNPB_050569300	nucleus [GO:0005634]; DNA-binding transcription factor activity [GO:0003700]; sequence-specific DNA binding [GO:0043565]; regulation of transcription, DNA-templated [GO:0006355]		osa:4339653;	PF00170;PF07777;
30	LOC_Os06g10880	48.7883	-1.26441	0.479801	0.00322309	0.00914098	bZIP transcription factor, putative, expressed	Os06g0211200	ABL1, bZIP46, OsABL1, OsbZIP46, OsAREB8, OsABF2, OsABF3, OsbZIP46CA1, OsZIP46, ZIP46	NA	NA	B9FS56	B9FS56_ORYSJ	unreviewed	BZIP domain-containing protein	OsJ_20562	DNA-binding transcription factor activity [GO:0003700]			PF00170;
31	LOC_Os06g10880	48.7883	-1.26441	0.479801	0.00322309	0.00914098	bZIP transcription factor, putative, expressed	Os06g0211200	ABL1, bZIP46, OsABL1, OsbZIP46, OsAREB8, OsABF2, OsABF3, OsbZIP46CA1, OsZIP46, ZIP46	NA	NA	Q69TW5	BZP46_ORYSJ	reviewed	bZIP transcription factor 46 (OsBZIP46) (AREB/ABF-family transcription factor 8) (OsAREB8) (Abscisic acid responsive elements-binding factor 2) (ABRE-binding factor 2) (OsABF2) (Abscisic acid responsive elements-binding factor 3) (ABRE-binding factor 3) (OsABF3) (Protein ABI5-LIKE 1)	BZIP46 ABF2 ABF3 ABL1 AREB8 Os06g0211200 LOC_Os06g10880 P0021C04.25 P0701E03.2	nucleus [GO:0005634]; DNA-binding transcription factor activity [GO:0003700]; sequence-specific DNA binding [GO:0043565]; abscisic acid-activated signaling pathway [GO:0009738]; positive regulation of abscisic acid-activated signaling pathway [GO:0009789]; regulation of transcription, DNA-templated [GO:0006355]; response to salt stress [GO:0009651]; response to water deprivation [GO:0009414]	SUBCELLULAR LOCATION: Nucleus {ECO:0000255|PROSITE-ProRule:PRU00978, ECO:0000269|PubMed:20576316, ECO:0000269|PubMed:21546455, ECO:0000269|PubMed:22301130, ECO:0000269|PubMed:26300907, ECO:0000269|PubMed:27468891}.	osa:4340462;	PF00170;
32	LOC_Os02g03960	131.966	-1.55379	0.242599	4.72e-11	5e-10	CPuORF1 - conserved peptide uORF-containing transcript, expressed	Os02g0132500	OsbZIP14	NA	NA	A3A2U4	A3A2U4_ORYSJ	unreviewed	Os02g0132500 protein	Os02g0132500 OsJ_05262	nucleus [GO:0005634]; DNA-binding transcription factor activity [GO:0003700]; sequence-specific DNA binding [GO:0043565]; transcription regulatory region DNA binding [GO:0044212]; positive regulation of transcription, DNA-templated [GO:0045893]		osa:4328205;	PF00170;
33	LOC_Os02g10140	11.0043	-1.74406	0.711599	0.0033453	0.0094463	bZIP transcription factor domain containing protein, expressed	Os02g0194900	OsbZIP17	NA	NA	Q0E342	TGAL9_ORYSJ	reviewed	Transcription factor TGAL9 (bZIP transcription factor 17) (OsbZIP17)	TGAL9 Os02g0194900 LOC_Os02g10140 OJ1225_F07.6 OsJ_05742	nucleus [GO:0005634]; DNA-binding transcription factor activity [GO:0003700]; sequence-specific DNA binding [GO:0043565]; defense response [GO:0006952]; transcription, DNA-templated [GO:0006351]	SUBCELLULAR LOCATION: Nucleus {ECO:0000255|PROSITE-ProRule:PRU00978}.		PF00170;PF14144;
34	LOC_Os11g11100	415.105	-1.80583	0.151692	2.94e-33	2.09e-31	bZIP transcription factor domain containing protein, expressed	Os11g0218000	OsbZIP82	NA	NA	Q0ITT8	Q0ITT8_ORYSJ	unreviewed	Os11g0218000 protein	Os11g0218000	DNA-binding transcription factor activity [GO:0003700]		osa:4350088;
35	LOC_Os01g55150	3.56595	-2.3296	1.79249	0.016488	0.0382195	bZIP transcription factor domain containing protein, expressed	Os01g0756200	OsbZIP06, OsbZIP6	NA	NA	Q5JMK6	BZP06_ORYSJ	reviewed	Basic leucine zipper 6 (OsbZIP06) (bZIP protein 6)	BZIP06 Os01g0756200 LOC_Os01g55150 OsJ_03500 P0503C12.45	nucleus [GO:0005634]; DNA binding [GO:0003677]; DNA-binding transcription factor activity [GO:0003700]; positive regulation of transcription, DNA-templated [GO:0045893]	SUBCELLULAR LOCATION: Nucleus {ECO:0000255|PROSITE-ProRule:PRU00978}.	osa:4325139;	PF00170;
36	LOC_Os01g58760	38.7704	-2.40174	0.420619	1.89e-09	1.63e-08	bZIP transcription factor domain containing protein, expressed	Os01g0801901	OsbZIP07, OsbZIP7	NA	NA	A2ZYR0	A2ZYR0_ORYSJ	unreviewed	BZIP domain-containing protein	OsJ_03780	DNA-binding transcription factor activity [GO:0003700]			PF07716;
37	LOC_Os06g50480	4.50955	-2.47945	1.10246	0.00292224	0.00839872	bZIP transcription factor domain containing protein, expressed	Os06g0719500	OsbZIP54, OsFD6	NA	NA	C7J3L3	C7J3L3_ORYSJ	unreviewed	Os06g0719500 protein	Os06g0719500	DNA-binding transcription factor activity [GO:0003700]			PF00170;
38	LOC_Os02g03580	336.198	-2.73771	0.22676	1.54e-34	1.18e-32	transcription factor, putative, expressed	Os02g0128200	OsbZIP13	NA	NA	Q0E4A6	Q0E4A6_ORYSJ	unreviewed	Os02g0128200 protein (Putative transcription factor HBP-1a)	Os02g0128200 OsJ_05225 P0482F12.32 P0576F08.5	nucleus [GO:0005634]; DNA-binding transcription factor activity [GO:0003700]; sequence-specific DNA binding [GO:0043565]; regulation of transcription, DNA-templated [GO:0006355]		osa:4328173;	PF00170;PF07777;
39	LOC_Os03g56010	2.27781	-2.93307	2.66272	0.010523	0.0259135	bZIP transcription factor domain containing protein, expressed	Os03g0770000	OsbZIP32	NA	NA	A0A0N7KI44	A0A0N7KI44_ORYSJ	unreviewed	Os03g0770000 protein	Os03g0770000 OSNPB_030770000	nucleus [GO:0005634]; DNA-binding transcription factor activity [GO:0003700]; sequence-specific DNA binding [GO:0043565]; transcription regulatory region DNA binding [GO:0044212]; positive regulation of transcription, DNA-templated [GO:0045893]		osa:4334255;	PF00170;
40	LOC_Os07g48180	4.87898	-2.94472	1.66685	0.00673991	0.0174937	bZIP transcription factor domain containing protein, expressed	Os07g0679500	OsbZIP61	NA	NA	Q0D3L8	Q0D3L8_ORYSJ	unreviewed	Os07g0679500 protein (Fragment)	Os07g0679500	DNA-binding transcription factor activity [GO:0003700]			PF00170;
41	LOC_Os06g50600	12.0783	-3.09669	0.638676	1.86e-07	1.2e-06	bZIP transcription factor domain containing protein, expressed	Os06g0720900	OsbZIP55, OsFD2	NA	NA	A0A0P0X1A0	A0A0P0X1A0_ORYSJ	unreviewed	Os06g0719500 protein (Fragment)	Os06g0719500 OSNPB_060719500	nucleus [GO:0005634]; DNA-binding transcription factor activity [GO:0003700]			PF00170;
42	LOC_Os12g40920	371.936	-3.19326	0.381627	6.81e-18	1.49e-16	bZIP transcription factor domain containing protein, expressed	Os12g0601800	OsbZIP88	NA	NA	Q2QMJ7	Q2QMJ7_ORYSJ	unreviewed	BZIP transcription factor family protein, expressed	LOC_Os12g40920	DNA-binding transcription factor activity [GO:0003700]			PF00170;PF12498;
43	LOC_Os12g40920	371.936	-3.19326	0.381627	6.81e-18	1.49e-16	bZIP transcription factor domain containing protein, expressed	Os12g0601800	OsbZIP88	NA	NA	Q2QMJ8	Q2QMJ8_ORYSJ	unreviewed	BZIP transcription factor family protein, expressed	LOC_Os12g40920	DNA-binding transcription factor activity [GO:0003700]			PF00170;
44	LOC_Os12g40920	371.936	-3.19326	0.381627	6.81e-18	1.49e-16	bZIP transcription factor domain containing protein, expressed	Os12g0601800	OsbZIP88	NA	NA	A0A0N7KUB6	A0A0N7KUB6_ORYSJ	unreviewed	Os12g0601800 protein	Os12g0601800 OSNPB_120601800	DNA-binding transcription factor activity [GO:0003700]			PF00170;PF12498;
45	LOC_Os09g36910	11.3622	-3.35693	0.742905	8.03e-07	4.69e-06	bZIP transcription factor domain containing protein, expressed	Os09g0540800	OsbZIP77, OsFD1, FD1	NA	NA	A0A0P0XR34	A0A0P0XR34_ORYSJ	unreviewed	Os09g0540800 protein	Os09g0540800 OSNPB_090540800	nucleus [GO:0005634]; DNA-binding transcription factor activity [GO:0003700]		osa:9271661;	PF00170;
46	LOC_Os03g21800	58.4201	-3.79613	0.460563	2.13e-17	4.4e-16	bZIP transcription factor family protein, putative, expressed	Os03g0336200	RF2b, OsbZIP30	NA	NA	Q6S4P4	RF2B_ORYSJ	reviewed	Transcription factor RF2b	RF2b Os03g0336200 LOC_Os03g21800	nucleus [GO:0005634]; DNA binding [GO:0003677]; DNA-binding transcription factor activity [GO:0003700]	SUBCELLULAR LOCATION: Nucleus {ECO:0000255|PROSITE-ProRule:PRU00978, ECO:0000269|PubMed:14704272}.	osa:4332761;	PF00170;
47	LOC_Os02g14910	5.64545	-3.99296	1.26685	0.000283335	0.00103625	bZIP transcription factor family protein, putative, expressed	Os02g0247100	OsbZIP19	NA	NA	Q6K3R9	BZP19_ORYSJ	reviewed	Basic leucine zipper 19 (OsbZIP19) (bZIP protein 19)	BZIP19 Os02g0247100 LOC_Os02g14910 OSJNBa0090H18.24	nucleus [GO:0005634]; DNA binding [GO:0003677]; DNA-binding transcription factor activity [GO:0003700]; positive regulation of transcription, DNA-templated [GO:0045893]	SUBCELLULAR LOCATION: Nucleus {ECO:0000255|PROSITE-ProRule:PRU00978}.	osa:4328871;	PF00170;
48	LOC_Os08g26880	147.625	-4.53627	0.430085	5.54e-27	2.57e-25	bZIP transcription factor domain containing protein, expressed	Os08g0357300	OsbZIP65	NA	NA	A3BSC5	A3BSC5_ORYSJ	unreviewed	BZIP domain-containing protein	OsJ_27035	DNA-binding transcription factor activity [GO:0003700]		osa:4345363;	PF00170;
49	LOC_Os06g45140	91.9183	-4.61002	0.510929	1.37e-20	3.76e-19	bZIP transcription factor domain containing protein, expressed	Os06g0662200	OsbZIP52	NA	NA	Q654B3	RSBZ5_ORYSJ	reviewed	bZIP transcription factor RISBZ5 (Rice seed bZIP5) (bZIP transcription factor 52) (OsbZIP52)	RISBZ5 BZIP52 Os06g0662200 LOC_Os06g45140 OsJ_22252 OSJNBb0065C04.12	nucleus [GO:0005634]; DNA binding [GO:0003677]; DNA-binding transcription factor activity [GO:0003700]	SUBCELLULAR LOCATION: Nucleus {ECO:0000255|PROSITE-ProRule:PRU00978, ECO:0000269|PubMed:22189955}.	osa:4341753;	PF00170;
50	LOC_Os10g38820	4.31511	-5.04869	2.61206	0.000396976	0.00140482	bZIP family transcription factor, putative, expressed	Os10g0531900	OsbZIP78	NA	NA	Q8LN44	Q8LN44_ORYSJ	unreviewed	BZIP transcription factor family protein, expressed (Os10g0531900 protein)	LOC_Os10g38820 Os10g0531900 OSNPB_100531900	DNA-binding transcription factor activity [GO:0003700]		osa:4349212;	PF00170;

## Sheet: C2H2_root
Sl No	C2H2	baseMean	log2FoldChange	lfcSE	pvalue	padj	MSU_annotation	RAPD	Oryzabase_symbol	Custom.Annot	References	UNIPROT	Uniprot.Entry.name	Status	Protein.names	Gene.names	Gene.ontology..GO.	Subcellular.location..CC.	Cross.reference..KEGG.	Cross.reference..Pfam.
1	LOC_Os05g02390	239.044	4.89161	0.364103	4.56e-42	1.56e-39	ZOS5-02 - C2H2 zinc finger protein, expressed	Os05g0114400	OsDLN129			B9FKB9	B9FKB9_ORYSJ	unreviewed	Os05g0114400 protein (Putative C2H2 type zinc finger transcription factor ZFP16) (Putative zinc finger protein)	Os05g0114400 OJ1654_B10.5 OsJ_16882 OSJNBb0041A22.16	nucleic acid binding [GO:0003676]		osa:4337609;
2	LOC_Os01g65080	1488.15	1.53255	0.141618	5.63e-28	6.52e-26	ZOS1-18 - C2H2 zinc finger protein, expressed	Os01g0871200	OsbHLH033, bHLH033, bHLH33, OsZFP, ZFP			Q943I6	STOP1_ORYSJ	reviewed	Zinc finger protein STOP1 homolog (Protein STOP1 homolog)	Os01g0871200 LOC_Os01g65080 OsJ_04239 OSJNBb0008G24.8 P0039A07.24-1	nucleus [GO:0005634]; metal ion binding [GO:0046872]; nucleic acid binding [GO:0003676]; regulation of transcription, DNA-templated [GO:0006355]	SUBCELLULAR LOCATION: Nucleus {ECO:0000305}.	osa:4324940;
3	LOC_Os01g09850	84.2623	1.24185	0.283544	3.17e-06	2.81e-05	ZOS1-04 - C2H2 zinc finger protein, expressed	Os01g0195000	OsIDD2			A2ZQ88	A2ZQ88_ORYSJ	unreviewed	Os01g0195000 protein (Putative zinc finger protein ID1)	Os01g0195000 OsJ_00729 P0001B06.25 P0498B01.11	nucleus [GO:0005634]; DNA-binding transcription factor activity [GO:0003700]; nucleic acid binding [GO:0003676]		osa:4327319;
4	LOC_Os01g09850	84.2623	1.24185	0.283544	3.17e-06	2.81e-05	ZOS1-04 - C2H2 zinc finger protein, expressed	Os01g0195066				A2ZQ88	A2ZQ88_ORYSJ	unreviewed	Os01g0195000 protein (Putative zinc finger protein ID1)	Os01g0195000 OsJ_00729 P0001B06.25 P0498B01.11	nucleus [GO:0005634]; DNA-binding transcription factor activity [GO:0003700]; nucleic acid binding [GO:0003676]		osa:4327319;
5	LOC_Os02g08510	36.1613	1.21046	0.538509	0.00559722	0.0211008	ZOS2-04 - C2H2 zinc finger protein, expressed	Os02g0182300				Q6H802	Q6H802_ORYSJ	unreviewed	Os02g0182300 protein	Os02g0182300 OSNPB_020182300	nucleic acid binding [GO:0003676]		osa:107277916;
6	LOC_Os01g39110	70.9491	0.823182	0.263937	0.000883027	0.004317	ZOS1-10 - C2H2 zinc finger protein, expressed	Os01g0572300	OsIDD11			A0A0N7KD71	A0A0N7KD71_ORYSJ	unreviewed	Os01g0572300 protein	Os01g0572300 OSNPB_010572300	nucleus [GO:0005634]; DNA-binding transcription factor activity [GO:0003700]; nucleic acid binding [GO:0003676]		osa:4326304;	PF00096;
7	LOC_Os08g44050	139.786	0.659688	0.217225	0.00148071	0.00678877	ZOS8-12 - C2H2 zinc finger protein, expressed	Os08g0554400	OsIDD6			A0A0P0XIH2	A0A0P0XIH2_ORYSJ	unreviewed	Os08g0554400 protein (Putative zinc finger protein)	Os08g0554400 OJ1125_C01.21 OSJNBb0011H15.47	nucleus [GO:0005634]; DNA-binding transcription factor activity [GO:0003700]; metal ion binding [GO:0046872]; nucleic acid binding [GO:0003676]			PF12171;
8	LOC_Os01g68160	217.476	0.483725	0.181607	0.00598877	0.0222629	ZOS1-22 - C2H2 zinc finger protein, expressed	Os01g0909500				Q5N885	Q5N885_ORYSJ	unreviewed	cDNA clone:J023026P04, full insert sequence		nucleic acid binding [GO:0003676]			PF17800;
9	LOC_Os01g68160	217.476	0.483725	0.181607	0.00598877	0.0222629	ZOS1-22 - C2H2 zinc finger protein, expressed	Os01g0909500				A0A0P0VBS5	A0A0P0VBS5_ORYSJ	unreviewed	Os01g0909500 protein	Os01g0909500 OSNPB_010909500				PF17800;
10	LOC_Os01g68160	217.476	0.483725	0.181607	0.00598877	0.0222629	ZOS1-22 - C2H2 zinc finger protein, expressed	Os01g0909500				B7EPQ1	B7EPQ1_ORYSJ	unreviewed	Os01g0909500 protein (cDNA clone:J013116D08, full insert sequence)	Os01g0909500 OSNPB_010909500	nucleolus [GO:0005730]			PF17800;
11	LOC_Os03g60570	91.8624	-0.728835	0.255507	0.00236048	0.0101508	ZOS3-22 - C2H2 zinc finger protein, expressed	Os03g0820400	ZFP 15			A0A0P0W4W1	A0A0P0W4W1_ORYSJ	unreviewed	Os03g0820400 protein (Putative Cys2/His2 zinc-finger protein)	OJ1754_E06.20 Os03g0820400	nucleic acid binding [GO:0003676]		osa:4334593;
12	LOC_Os12g39400	48.3317	-0.88859	0.39393	0.00949446	0.0326878	ZOS12-09 - C2H2 zinc finger protein, expressed	Os12g0583700	RZF71, DLN263, OsDLN263			Q0IM98	Q0IM98_ORYSJ	unreviewed	Os12g0583700 protein	Os12g0583700	nucleic acid binding [GO:0003676]		osa:4352653;
13	LOC_Os11g47630	29.4913	-0.938584	0.382557	0.00531007	0.0202062	ZOS11-10 - C2H2 zinc finger protein, expressed	Os11g0702400				Q53NL6	Q53NL6_ORYSJ	unreviewed	Os11g0702400 protein (Zinc finger, C2H2 type family protein, expressed) (cDNA clone:001-103-H07, full insert sequence) (cDNA clone:001-111-B01, full insert sequence)	LOC_Os11g47630 Os11g0702400 OSNPB_110702400	nucleic acid binding [GO:0003676]		osa:4351199;
14	LOC_Os03g55540	2160.38	-1.01009	0.167837	6.73e-10	1.08e-08	ZOS3-18 - C2H2 zinc finger protein, expressed	Os03g0764100	WZF1, OsWZF1, DLN99, OsDLN99			Q7G7I8	Q7G7I8_ORYSJ	unreviewed	Os03g0764100 protein (Zinc-finger protein 1, putative, expressed)	LOC_Os03g55540 Os03g0764100 OSNPB_030764100	nucleic acid binding [GO:0003676]		osa:4334213;
15	LOC_Os04g47860	66.6769	-1.05144	0.280831	6.34e-05	0.000421764	ZOS4-11 - C2H2 zinc finger protein, expressed	Os04g0566400	OsIDD10			B7EEB7	B7EEB7_ORYSJ	unreviewed	Os04g0566400 protein (cDNA clone:J013132I07, full insert sequence)	Os04g0566400 OSNPB_040566400
16	LOC_Os04g47860	66.6769	-1.05144	0.280831	6.34e-05	0.000421764	ZOS4-11 - C2H2 zinc finger protein, expressed	Os04g0566400	OsIDD10			A0A0P0WDK4	A0A0P0WDK4_ORYSJ	unreviewed	Os04g0566400 protein	Os04g0566400 OSNPB_040566400	nucleus [GO:0005634]; DNA-binding transcription factor activity [GO:0003700]; metal ion binding [GO:0046872]; nucleic acid binding [GO:0003676]			PF12171;
17	LOC_Os04g08060	22.725	-1.07317	0.440717	0.0044419	0.0173923	ZOS4-03 - C2H2 zinc finger protein, expressed	Os04g0162500	OsDLN107, WACH1, OsWACH1			Q7XSM9	Q7XSM9_ORYSJ	unreviewed	OSJNBb0028M18.8 protein (OSJNBb0050N09.1 protein)	OSJNBb0050N09.1 OsJ_13762 OSJNBb0028M18.8	nucleic acid binding [GO:0003676]		osa:4335039;
18	LOC_Os01g62190	53.6388	-1.36623	0.407131	0.000163818	0.000977965	ZOS1-15 - C2H2 zinc finger protein, expressed	Os01g0839100	OsZFP179, DLN27, OsDLN27			Q5NA09	Q5NA09_ORYSJ	unreviewed	Os01g0839100 protein (cDNA clone:002-140-F08, full insert sequence)	Os01g0839100 OSNPB_010839100	nucleic acid binding [GO:0003676]		osa:9272517;
19	LOC_Os04g59380	18.2939	-1.66664	0.529278	0.000253711	0.00144646	ZOS4-14 - C2H2 zinc finger protein, expressed	Os04g0690100				A0A0P0WH00	A0A0P0WH00_ORYSJ	unreviewed	Os04g0690100 protein (Fragment)	Os04g0690100	nucleic acid binding [GO:0003676]
20	LOC_Os01g62130	43.6414	-1.7619	0.469623	2.46e-05	0.000180842	ZOS1-14 - C2H2 zinc finger protein, expressed	Os01g0838600	OsDLN26			Q5NA12	Q5NA12_ORYSJ	unreviewed	Os01g0838600 protein	Os01g0838600 OSNPB_010838600	nucleic acid binding [GO:0003676]		osa:4327377;
21	LOC_Os11g06840	3.99805	-2.19104	1.42325	0.0113496	0.0379627	ZOS11-01 - C2H2 zinc finger protein, expressed	Os11g0169400				Q53JG9	Q53JG9_ORYSJ	unreviewed	Zinc finger, C2H2 type family protein, expressed	LOC_Os11g06840	nucleic acid binding [GO:0003676]		osa:4349886;
22	LOC_Os03g32230	183.326	-2.63186	0.280917	6.52e-22	4.38e-20	ZOS3-12 - C2H2 zinc finger protein, expressed	Os03g0437200	ZFP36, OsZFP36, OsBSRD1, Bsr-d1, bsr-d1, DLN91, OsDLN91			Q75KE5	ZFP36_ORYSJ	reviewed	Zinc finger protein 36 (Protein BROAD-SPECTRUM RESISTANCE DIGU 1)	ZFP36 BSR-D1 Os03g0437200 LOC_Os03g32230 OsJ_11395 OSJNBa0054H04.4 OSJNBb0034P05.8	DNA binding [GO:0003677]; metal ion binding [GO:0046872]; response to oxidative stress [GO:0006979]; response to water deprivation [GO:0009414]		osa:4333197;
23	LOC_Os03g15790	6.09909	-2.70163	1.12839	0.00183969	0.00821329	ZOS3-08 - C2H2 zinc finger protein, expressed	Os03g0264600				A0A0N7KGZ5	A0A0N7KGZ5_ORYSJ	unreviewed	Os03g0264600 protein (Fragment)	Os03g0264600 OSNPB_030264600	integral component of membrane [GO:0016021]; transcription regulatory region DNA binding [GO:0044212]

[truncated: 14 more sheets: C2H2_leaves_seedling, C2H2_leaves_mature, AP2_ERF_root, AP2_ERF_leaves_seedling, AP2_ERF_leaves_mature, MYB_root, MYB_leaves_seedling, MYB_leaves_mature, NAC_root, NAC_leaves_seedling, NAC_leaves_mature, WRKY_root, WRKY_leaves_seedling, WRKY_leaves_mature]
