# Supplementary material for: Transcriptomic Analysis Revealed Reactive Oxygen Species Scavenging Mechanisms Associated With Ferrous Iron Toxicity in Aromatic Keteki Joha Rice
Source: Front Plant Sci. 2022 Feb 24;13:798580. doi: 10.3389/fpls.2022.798580 (PMC8913046; doi:10.3389/fpls.2022.798580)
Supplement: Supplementary Table S5 — Differential expression of heavy metal related genes. [file Table_5.XLSX]

## Sheet: HMP_root
Sl No	HMA	baseMean	log2FoldChange	lfcSE	pvalue	padj	MSU_annotation	RAPD	Oryzabase_symbol	Custom.Annot	References	UNIPROT	Uniprot.Entry.name	Status	Protein.names	Gene.names	Gene.ontology..GO.	Subcellular.location..CC.	Cross.reference..KEGG.	Cross.reference..Pfam.
1	LOC_Os01g61070	117.706	2.89263	0.25817	4.47e-30	6.43e-28	heavy metal-associated domain containing protein, expressed	Os01g0826000	OsATX, OsHMP7, HMP7, OsHMP07			Q94D91	Q94D91_ORYSJ	unreviewed	Os01g0826000 protein	Os01g0826000 OSNPB_010826000	metal ion binding [GO:0046872]; metal ion transport [GO:0030001]		osa:4327517;	PF00403;
2	LOC_Os02g32814	292.695	1.99179	0.229785	6.05e-19	3.07e-17	heavy metal-associated domain containing protein, expressed	Os02g0530100	OsATX1, CCH, ATX1, OsHMP14, HMP14			A0A0P0VJT1	A0A0P0VJT1_ORYSJ	unreviewed	Os02g0530100 protein (Fragment)	Os02g0530100 OSNPB_020530100	metal ion binding [GO:0046872]; metal ion transport [GO:0030001]			PF00403;
3	LOC_Os01g70710	385.623	1.79747	0.1881	1.94e-22	1.39e-20	heavy metal-associated domain containing protein, expressed	Os01g0933200	OsHMP9, OsHMP09			Q5JMG8	Q5JMG8_ORYSJ	unreviewed	Os01g0933200 protein	Os01g0933200 OSNPB_010933200	metal ion binding [GO:0046872]; metal ion transport [GO:0030001]		osa:4326823;	PF00403;
4	LOC_Os01g74490	62.2413	1.16757	0.278928	8.47e-06	6.89e-05	heavy metal-associated domain containing protein, expressed	Os01g0976300	OsHMP10			Q94CS5	Q94CS5_ORYSJ	unreviewed	Os01g0976300 protein (cDNA clone:002-181-G11, full insert sequence)	Os01g0976300 OSNPB_010976300	metal ion binding [GO:0046872]; metal ion transport [GO:0030001]		osa:4324307;	PF00403;
5	LOC_Os06g35060	54.2589	1.16655	0.313368	5.85e-05	0.000394155	heavy metal-associated domain containing protein, expressed	Os06g0542300	OsHMP32			Q5Z6Y0	Q5Z6Y0_ORYSJ	unreviewed	Os06g0542300 protein (cDNA, clone: J100052L04, full insert sequence)	Os06g0542300 OSNPB_060542300	metal ion binding [GO:0046872]; metal ion transport [GO:0030001]		osa:4341233;	PF00403;
6	LOC_Os01g52160	135.141	1.02393	0.260284	3.03e-05	0.000218887	heavy metal-associated domain containing protein, expressed	Os01g0719600	OsHMP5, OsHMP05			Q5JL91	Q5JL91_ORYSJ	unreviewed	Os01g0719600 protein (cDNA clone:J023077M05, full insert sequence)	Os01g0719600 OSNPB_010719600	metal ion binding [GO:0046872]; metal ion transport [GO:0030001]		osa:4324699;	PF00403;
7	LOC_Os01g20830	37.4888	0.970907	0.338629	0.00154006	0.00703042	heavy metal-associated domain containing protein, expressed	Os01g0309800	OsHMP2, OsHMP02			Q0JNB2	Q0JNB2_ORYSJ	unreviewed	Os01g0309800 protein	Os01g0309800 OsJ_01474 OSJNBa0008D05.31 P0551A11.11	metal ion binding [GO:0046872]; metal ion transport [GO:0030001]		osa:4327761;	PF00403;
8	LOC_Os10g30450	287.597	0.94968	0.250524	6.03e-05	0.000404456	heavy-metal-associated domain-containing protein, putative, expressed	Os10g0440500	OsHMP43			Q7XE25	Q7XE25_ORYSJ	unreviewed	Heavy metal-associated domain containing protein, expressed	LOC_Os10g30450	metal ion binding [GO:0046872]; metal ion transport [GO:0030001]		osa:4348724;	PF00403;
9	LOC_Os03g60480	29.5103	0.820905	0.35978	0.0102549	0.0348862	heavy metal-associated domain containing protein, expressed	Os03g0819400	OsHMP22			A0A0P0W4R0	A0A0P0W4R0_ORYSJ	unreviewed	Os03g0819400 protein	OJ1754_E06.11 Os03g0819400 OsJ_13132	metal ion binding [GO:0046872]; metal ion transport [GO:0030001]		osa:4334586;	PF00403;
10	LOC_Os01g32330	288.694	0.800916	0.177195	3.21e-06	2.85e-05	heavy metal-associated domain containing protein, expressed	Os01g0507700	OsHMP3, OsHMP03			A0A0P0V3B3	A0A0P0V3B3_ORYSJ	unreviewed	Farnesylated protein 2-like (Os01g0507700 protein)	Os01g0507700 OsJ_01952 OSJNBa0094H06.28	metal ion binding [GO:0046872]; cadmium ion homeostasis [GO:0055073]; detoxification of cadmium ion [GO:0071585]; metal ion transport [GO:0030001]		osa:4324048;	PF00403;
11	LOC_Os06g45500	895.512	0.614897	0.145651	1.64e-05	0.000125052	copper-transporting ATPase, putative, expressed	Os06g0665800	OsHMA9, oshma9-1, oshma9-2, HMA9, OsHMP33, HMP33			A0A0P0X004	HMA9_ORYSJ	reviewed	Cation-transporting ATPase HMA5 (EC 7.2.2.-) (Protein HEAVY METAL ATPASE 5) (OsHMA5)	HMA9 Os06g0665800 LOC_Os06g45500 P0473H04.28	integral component of membrane [GO:0016021]; plasma membrane [GO:0005886]; copper ion binding [GO:0005507]; copper transmembrane transporter activity, phosphorylative mechanism [GO:0043682]; nucleotide binding [GO:0000166]; response to toxic substance [GO:0009636]	SUBCELLULAR LOCATION: Cell membrane {ECO:0000269|PubMed:17827266}.	osa:4341778;	PF00403;
12	LOC_Os02g10290	718.891	0.500209	0.159733	0.00133498	0.00619656	copper-transporting ATPase, putative, expressed	Os02g0196600	OsHMA7, osHMA4, HMA7, OsHMP12, HMP12			Q6H7M3	HMA4_ORYSJ	reviewed	Copper-transporting ATPase HMA4 (EC 7.2.2.8) (Protein HEAVY METAL ATPASE 4) (OsHMA4)	HMA4 Os02g0196600 LOC_Os02g10290 OJ1225_F07.30 OJ1524_D08.15 OsJ_05752	integral component of membrane [GO:0016021]; vacuolar membrane [GO:0005774]; ATP binding [GO:0005524]; ATPase-coupled cation transmembrane transporter activity [GO:0019829]; copper ion binding [GO:0005507]; metal ion transport [GO:0030001]	SUBCELLULAR LOCATION: Vacuole membrane {ECO:0000269|PubMed:27387148}; Multi-pass membrane protein {ECO:0000255}.	osa:4328616;	PF00403;
13	LOC_Os04g46940	803.732	0.353088	0.14594	0.0135902	0.0441163	copper-transporting ATPase 3, putative, expressed	Os04g0556000	OsHMA8, osHMA5, HMA8, OsHMP27, HMP27			A3AWA4	HMA5_ORYSJ	reviewed	Copper-transporting ATPase HMA5 (EC 7.2.2.8) (Protein HEAVY METAL ATPASE 5) (OsHMA5)	HMA5 Os04g0556000 LOC_Os04g46940 OsJ_15734 OSJNBb0012E24.8	integral component of membrane [GO:0016021]; plasma membrane [GO:0005886]; ATP binding [GO:0005524]; ATPase-coupled cation transmembrane transporter activity [GO:0019829]; copper ion binding [GO:0005507]; detoxification of copper ion [GO:0010273]; metal ion transport [GO:0030001]	SUBCELLULAR LOCATION: Cell membrane {ECO:0000269|PubMed:24064929}; Multi-pass membrane protein {ECO:0000255}.	osa:4336625;	PF00403;
14	LOC_Os12g05040	58.5736	-0.634074	0.270617	0.0118233	0.0392769	heavy-metal-associated domain-containing protein, putative, expressed	Os12g0144600	OsHMP46			Q2QXS5	Q2QXS5_ORYSJ	unreviewed	Heavy metal-associated domain containing protein, expressed	LOC_Os12g05040	metal ion binding [GO:0046872]; metal ion transport [GO:0030001]			PF00403;
15	LOC_Os01g70240	62.3696	-0.827662	0.309306	0.00343886	0.0139661	expressed protein	Os01g0927300	OsHMP8, OsHMP08			Q5JK04	Q5JK04_ORYSJ	unreviewed	Os01g0927300 protein (cDNA clone:J033021C11, full insert sequence)	Os01g0927300 OSNPB_010927300	metal ion binding [GO:0046872]; metal ion transport [GO:0030001]			PF00403;
16	LOC_Os01g03490	85.6665	-1.03367	0.245846	9.45e-06	7.64e-05	heavy-metal-associated domain-containing protein, putative, expressed	Os01g0125600	OsHMP1, OsHMP01			Q0JR23	Q0JR23_ORYSJ	unreviewed	Os01g0125600 protein	Os01g0125600 P0037C04.32	metal ion binding [GO:0046872]; metal ion transport [GO:0030001]		osa:4326005;	PF00403;
17	LOC_Os03g05750	435.618		0.190615	8.37e-09	1.13e-07	heavy-metal-associated domain-containing protein, putative, expressed	Os03g0152000	OsHMP18			Q0DV35	Q0DV35_ORYSJ	unreviewed	Os03g0152000 protein	Os03g0152000	metal ion binding [GO:0046872]; metal ion transport [GO:0030001]		osa:4331647;	PF00403;
18	LOC_Os03g64340	28.1555	-1.07364	0.463483	0.00585846	0.0218956	heavy metal-associated domain containing protein, expressed	Os03g0861400	OsHMP23			Q7Y1E4	Q7Y1E4_ORYSJ	unreviewed	Heavy metal-associated domain containing protein, expressed	LOC_Os03g64340	metal ion binding [GO:0046872]; metal ion transport [GO:0030001]			PF00403;
19	LOC_Os08g10480	2497.67	-1.34137	0.196812	2.24e-12	5.07e-11	heavy metal-associated domain containing protein, expressed	Os08g0205400	OsATX1, OsHMP37, HMP37			A3BQM1	A3BQM1_ORYSJ	unreviewed	Os08g0205400 protein (Putative copper chaperone)	Os08g0205400 OJ1119_C05.6 OsJ_26405 P0486F07.35	metal ion binding [GO:0046872]; metal ion transport [GO:0030001]		osa:4344925;	PF00403;
20	LOC_Os08g31340	27.0556	-1.40131	0.415304	0.000154108	0.000928655	heavy metal-associated domain containing protein, expressed	Os08g0405700	OsHMP40			A0A0P0XG11	A0A0P0XG11_ORYSJ	unreviewed	Os08g0405700 protein	Os08g0405700 OsJ_27250 P0685B10.33	metal ion binding [GO:0046872]; metal ion transport [GO:0030001]		osa:4345527;	PF00403;
21	LOC_Os04g17100	197.71	-1.60265	0.296797	1.15e-08	1.52e-07	heavy metal-associated domain containing protein, expressed	Os04g0244800	OsHMP24			Q7XWS9	Q7XWS9_ORYSJ	unreviewed	Os04g0244800 protein (cDNA clone:J023150J09, full insert sequence)	Os04g0244800 OSNPB_040244800	metal ion binding [GO:0046872]; metal ion transport [GO:0030001]		osa:4335295;	PF00403;
22	LOC_Os05g45820	8.09348	-2.90995	0.948489	0.000275816	0.00155542	heavy metal-associated domain containing protein, expressed	Os05g0534500	OsHMP31			Q0DGG0	Q0DGG0_ORYSJ	unreviewed	Os05g0534500 protein	Os05g0534500 OSJNBa0053E05.22	metal ion binding [GO:0046872]; metal ion transport [GO:0030001]		osa:4339433;	PF00403;
23	LOC_Os01g55320	36.8533	-3.46007	0.51211	1.61e-12	3.71e-11	heavy metal-associated domain containing protein, expressed	Os01g0758000	OsHMP6, OsHMP06			Q0JJ65	Q0JJ65_ORYSJ	unreviewed	Os01g0758000 protein	Os01g0758000	metal ion binding [GO:0046872]; metal ion transport [GO:0030001]		osa:4325307;	PF00403;

## Sheet: HMP_leaves_seedling
Sl no	HMA	baseMean	log2FoldChange	lfcSE	pvalue	padj	MSU_annotation	RAPD	Oryzabase_symbol	Custom.Annot	References	UNIPROT	Uniprot.Entry.name	Status	Protein.names	Gene.names	Gene.ontology..GO.	Subcellular.location..CC.	Cross.reference..KEGG.	Cross.reference..Pfam.
1	LOC_Os01g74490	139.135	4.1491	0.43571	1.08e-22	1.49e-20	heavy metal-associated domain containing protein, expressed	Os01g0976300	OsHMP10	NA	NA	Q94CS5	Q94CS5_ORYSJ	unreviewed	Os01g0976300 protein (cDNA clone:002-181-G11, full insert sequence)	Os01g0976300 OSNPB_010976300	metal ion binding [GO:0046872]; metal ion transport [GO:0030001]		osa:4324307;	PF00403;
2	LOC_Os03g05750	85.8724	2.83227	0.548926	1.93e-08	3.08e-07	heavy-metal-associated domain-containing protein, putative, expressed	Os03g0152000	OsHMP18	NA	NA	Q0DV35	Q0DV35_ORYSJ	unreviewed	Os03g0152000 protein	Os03g0152000	metal ion binding [GO:0046872]; metal ion transport [GO:0030001]		osa:4331647;	PF00403;
3	LOC_Os10g30450	144.643	2.56968	0.380086	1.27e-12	4.41e-11	heavy-metal-associated domain-containing protein, putative, expressed	Os10g0440500	OsHMP43	NA	NA	Q7XE25	Q7XE25_ORYSJ	unreviewed	Heavy metal-associated domain containing protein, expressed	LOC_Os10g30450	metal ion binding [GO:0046872]; metal ion transport [GO:0030001]		osa:4348724;	PF00403;
4	LOC_Os04g32030	148.339	2.52935	0.478595	1.13e-08	1.9e-07	heavy metal-associated domain containing protein, expressed	Os04g0390100	OsHMP25	NA	NA	A0A0P0W9Z3	A0A0P0W9Z3_ORYSJ	unreviewed	OSJNBa0053B21.14 protein	OSJNBa0053B21.14	metal ion binding [GO:0046872]; metal ion transport [GO:0030001]			PF00403;
5	LOC_Os02g10290	954.467	2.15703	0.23789	1.35e-20	1.45e-18	copper-transporting ATPase, putative, expressed	Os02g0196600	OsHMA7, osHMA4, HMA7, OsHMP12, HMP12	NA	NA	Q6H7M3	HMA4_ORYSJ	reviewed	Copper-transporting ATPase HMA4 (EC 7.2.2.8) (Protein HEAVY METAL ATPASE 4) (OsHMA4)	HMA4 Os02g0196600 LOC_Os02g10290 OJ1225_F07.30 OJ1524_D08.15 OsJ_05752	integral component of membrane [GO:0016021]; vacuolar membrane [GO:0005774]; ATP binding [GO:0005524]; ATPase-coupled cation transmembrane transporter activity [GO:0019829]; copper ion binding [GO:0005507]; metal ion transport [GO:0030001]	SUBCELLULAR LOCATION: Vacuole membrane {ECO:0000269|PubMed:27387148}; Multi-pass membrane protein {ECO:0000255}.	osa:4328616;	PF00403;
6	LOC_Os06g45500	474.501	1.99923	0.301471	4.15e-12	1.31e-10	copper-transporting ATPase, putative, expressed	Os06g0665800	OsHMA9, oshma9-1, oshma9-2, HMA9, OsHMP33, HMP33	NA	NA	A0A0P0X004	HMA9_ORYSJ	reviewed	Cation-transporting ATPase HMA5 (EC 7.2.2.-) (Protein HEAVY METAL ATPASE 5) (OsHMA5)	HMA9 Os06g0665800 LOC_Os06g45500 P0473H04.28	integral component of membrane [GO:0016021]; plasma membrane [GO:0005886]; copper ion binding [GO:0005507]; copper transmembrane transporter activity, phosphorylative mechanism [GO:0043682]; nucleotide binding [GO:0000166]; response to toxic substance [GO:0009636]	SUBCELLULAR LOCATION: Cell membrane {ECO:0000269|PubMed:17827266}.	osa:4341778;	PF00403;
7	LOC_Os01g61070	256.523	1.72282	0.342582	7.17e-08	1.01e-06	heavy metal-associated domain containing protein, expressed	Os01g0826000	OsATX, OsHMP7, HMP7, OsHMP07	NA	NA	Q94D91	Q94D91_ORYSJ	unreviewed	Os01g0826000 protein	Os01g0826000 OSNPB_010826000	metal ion binding [GO:0046872]; metal ion transport [GO:0030001]		osa:4327517;	PF00403;
8	LOC_Os08g10480	601.327	1.39307	0.240116	1.41e-09	2.88e-08	heavy metal-associated domain containing protein, expressed	Os08g0205400	OsATX1, OsHMP37, HMP37	NA	NA	A3BQM1	A3BQM1_ORYSJ	unreviewed	Os08g0205400 protein (Putative copper chaperone)	Os08g0205400 OJ1119_C05.6 OsJ_26405 P0486F07.35	metal ion binding [GO:0046872]; metal ion transport [GO:0030001]		osa:4344925;	PF00403;
9	LOC_Os01g70710	670.408	1.06931	0.170887	1.43e-10	3.46e-09	heavy metal-associated domain containing protein, expressed	Os01g0933200	OsHMP9, OsHMP09	NA	NA	Q5JMG8	Q5JMG8_ORYSJ	unreviewed	Os01g0933200 protein	Os01g0933200 OSNPB_010933200	metal ion binding [GO:0046872]; metal ion transport [GO:0030001]		osa:4326823;	PF00403;
10	LOC_Os03g08070	667.152	-0.880175	0.17759	3.13e-07	3.85e-06	copper-transporting ATPase PAA1, putative, expressed	Os03g0178100	OsHMA6, osHMA8, HMA6, OsHMP20, HMP20	NA	NA	Q10QZ2	Q10QZ2_ORYSJ	unreviewed	Copper-translocating P-type ATPase family protein, expressed	LOC_Os03g08070	integral component of membrane [GO:0016021]; ATP binding [GO:0005524]; ATPase-coupled cation transmembrane transporter activity [GO:0019829]; metal ion binding [GO:0046872]; metal ion transport [GO:0030001]	SUBCELLULAR LOCATION: Membrane {ECO:0000256|RuleBase:RU362081}.		PF00403;
11	LOC_Os03g08070	667.152	-0.880175	0.17759	3.13e-07	3.85e-06	copper-transporting ATPase PAA1, putative, expressed	Os03g0178100	OsHMA6, osHMA8, HMA6, OsHMP20, HMP20	NA	NA	Q10QZ3	Q10QZ3_ORYSJ	unreviewed	Copper-translocating P-type ATPase family protein, expressed	LOC_Os03g08070	integral component of membrane [GO:0016021]; ATP binding [GO:0005524]; ATPase-coupled cation transmembrane transporter activity [GO:0019829]; metal ion binding [GO:0046872]; metal ion transport [GO:0030001]	SUBCELLULAR LOCATION: Membrane {ECO:0000256|RuleBase:RU362081}.		PF00403;
12	LOC_Os02g30650	295.496	-1.10212	0.348355	0.00044185	0.0023723	heavy metal-associated domain containing protein, expressed	Os02g0510600	OsHMP13	NA	NA	B9F070	B9F070_ORYSJ	unreviewed	HMA domain-containing protein	OsJ_06872	metal ion binding [GO:0046872]; metal ion transport [GO:0030001]			PF00403;
13	LOC_Os02g30650	295.496	-1.10212	0.348355	0.00044185	0.0023723	heavy metal-associated domain containing protein, expressed	Os02g0510600	OsHMP13	NA	NA	Q6K793	Q6K793_ORYSJ	unreviewed	Os02g0510600 protein	Os02g0510600 OSNPB_020510600	metal ion binding [GO:0046872]; metal ion transport [GO:0030001]		osa:4329453;	PF00403;
14	LOC_Os07g47480	68.6946	-1.38291	0.441425	0.00033641	0.00187859	heavy metal-associated domain containing protein, expressed	Os07g0671400	OsHMP36	NA	NA	A3BNA4	A3BNA4_ORYSJ	unreviewed	HMA domain-containing protein	OsJ_25529	metal ion binding [GO:0046872]; metal ion transport [GO:0030001]		osa:4344246;	PF00403;
15	LOC_Os07g47480	68.6946	-1.38291	0.441425	0.00033641	0.00187859	heavy metal-associated domain containing protein, expressed	Os07g0671400	OsHMP36	NA	NA	A0A0P0XAA3	A0A0P0XAA3_ORYSJ	unreviewed	Os07g0671400 protein	Os07g0671400	metal ion binding [GO:0046872]; metal ion transport [GO:0030001]			PF00403;
16	LOC_Os11g05010	80.596	-1.57621	0.612631	0.00134695	0.00629527	heavy-metal-associated domain-containing protein, putative, expressed	Os11g0147500	OsHMP45	NA	NA	A3C8M1	A3C8M1_ORYSJ	unreviewed	Os11g0147500 protein	Os11g0147500 OsJ_32960	metal ion binding [GO:0046872]; metal ion transport [GO:0030001]		osa:4349767;	PF00403;
17	LOC_Os01g20830	345.179	-1.65508	0.367134	9.63e-07	1.06e-05	heavy metal-associated domain containing protein, expressed	Os01g0309800	OsHMP2, OsHMP02	NA	NA	Q0JNB2	Q0JNB2_ORYSJ	unreviewed	Os01g0309800 protein	Os01g0309800 OsJ_01474 OSJNBa0008D05.31 P0551A11.11	metal ion binding [GO:0046872]; metal ion transport [GO:0030001]		osa:4327761;	PF00403;
18	LOC_Os01g70240	249.623	-1.91137	0.25983	2.45e-14	1.1e-12	expressed protein	Os01g0927300	OsHMP8, OsHMP08	NA	NA	Q5JK04	Q5JK04_ORYSJ	unreviewed	Os01g0927300 protein (cDNA clone:J033021C11, full insert sequence)	Os01g0927300 OSNPB_010927300	metal ion binding [GO:0046872]; metal ion transport [GO:0030001]			PF00403;
19	LOC_Os04g32850	1784.8	-2.07025	0.481361	1.63e-06	1.7e-05	basic proline-rich protein, putative, expressed	Os04g0401000	pi21, rMg40, OsHMP26, HMP26	NA	NA	Q7XL73	PI21_ORYSJ	reviewed	Protein PYRICULARIA ORYZAE RESISTANCE 21 (Pi21)	PI21 rMg40 LOC_Os04g32850 Os04g0401000 OsJ_14657 OSJNBb0014D23.16 OSNPB_040401000	metal ion binding [GO:0046872]; defense response [GO:0006952]; regulation of defense response to fungus [GO:1900150]; response to parasitic fungus [GO:0009623]		osa:4335725;
20	LOC_Os10g14870	252.255	-2.16516	0.232123	1.21e-21	1.48e-19	heavy metal-associated domain containing protein, expressed	Os10g0209700	OsHMP42	NA	NA	A0A5S6RAM7	A0A5S6RAM7_ORYSJ	unreviewed	Os10g0209700 protein (Putative ATFP3)	Os10g0209700 OsJ_15324 OSJNBa0082N11.9	metal ion binding [GO:0046872]; metal ion transport [GO:0030001]		osa:4348282;	PF00403;
21	LOC_Os07g12900	13.6532	-2.49892	0.613125	5.26e-06	4.86e-05	cadmium/zinc-transporting ATPase, putative, expressed	Os07g0232900	HMA3, OsHMA3, OsHMA3a, OsHMA3n, osHMA3, OsHMP34, HMP34	NA	NA	Q8H384	HMA3_ORYSJ	reviewed	Cadmium/zinc-transporting ATPase HMA3 (EC 7.2.2.12) (EC 7.2.2.21) (Protein HEAVY METAL ATPASE 3) (OsHMA3)	HMA3 CASTLE1n Os07g0232900 LOC_Os07g12900 OSJNBa0061L20.105	integral component of membrane [GO:0016021]; vacuolar membrane [GO:0005774]; ATP binding [GO:0005524]; cadmium ion transmembrane transporter activity [GO:0015086]; cadmium transmembrane transporter activity, phosphorylative mechanism [GO:0008551]; hydrolase activity [GO:0016787]; metal ion binding [GO:0046872]; zinc ion transmembrane transporter activity [GO:0005385]; zinc transmembrane transport…	SUBCELLULAR LOCATION: Vacuole membrane {ECO:0000269|PubMed:20823253, ECO:0000269|PubMed:20840506}; Multi-pass membrane protein {ECO:0000255}. Note=Localizes to the tonoplast of root cells. {ECO:0000269|PubMed:20823253, ECO:0000269|PubMed:20840506}.	osa:4342783;	PF00403;
22	LOC_Os01g52160	22.1528	-2.51434	0.653458	1.41e-05	0.00011604	heavy metal-associated domain containing protein, expressed	Os01g0719600	OsHMP5, OsHMP05	NA	NA	Q5JL91	Q5JL91_ORYSJ	unreviewed	Os01g0719600 protein (cDNA clone:J023077M05, full insert sequence)	Os01g0719600 OSNPB_010719600	metal ion binding [GO:0046872]; metal ion transport [GO:0030001]		osa:4324699;	PF00403;
23	LOC_Os03g64340	6.93462	-3.79916	1.11076	7.45e-05	0.000500986	heavy metal-associated domain containing protein, expressed	Os03g0861400	OsHMP23	NA	NA	Q7Y1E4	Q7Y1E4_ORYSJ	unreviewed	Heavy metal-associated domain containing protein, expressed	LOC_Os03g64340	metal ion binding [GO:0046872]; metal ion transport [GO:0030001]			PF00403;

## Sheet: HMP_leaves_mature
Sl No	HMA	baseMean	log2FoldChange	lfcSE	pvalue	padj	MSU_annotation	RAPD	Oryzabase_symbol	Custom.Annot	References	UNIPROT	Uniprot.Entry.name	Status	Protein.names	Gene.names	Gene.ontology..GO.	Subcellular.location..CC.	Cross.reference..KEGG.	Cross.reference..Pfam.
1	LOC_Os01g61070	256.523	7.486	0.598025	6.04e-36	5.01e-34	heavy metal-associated domain containing protein, expressed	Os01g0826000	OsATX, OsHMP7, HMP7, OsHMP07	NA	NA	Q94D91	Q94D91_ORYSJ	unreviewed	Os01g0826000 protein	Os01g0826000 OSNPB_010826000	metal ion binding [GO:0046872]; metal ion transport [GO:0030001]		osa:4327517;	PF00403;
2	LOC_Os01g70710	670.408	2.9892	0.179347	3.74e-63	1.27e-60	heavy metal-associated domain containing protein, expressed	Os01g0933200	OsHMP9, OsHMP09	NA	NA	Q5JMG8	Q5JMG8_ORYSJ	unreviewed	Os01g0933200 protein	Os01g0933200 OSNPB_010933200	metal ion binding [GO:0046872]; metal ion transport [GO:0030001]		osa:4326823;	PF00403;
3	LOC_Os01g20830	345.179	2.36861	0.382546	8.75e-11	8.94e-10	heavy metal-associated domain containing protein, expressed	Os01g0309800	OsHMP2, OsHMP02	NA	NA	Q0JNB2	Q0JNB2_ORYSJ	unreviewed	Os01g0309800 protein	Os01g0309800 OsJ_01474 OSJNBa0008D05.31 P0551A11.11	metal ion binding [GO:0046872]; metal ion transport [GO:0030001]		osa:4327761;	PF00403;
4	LOC_Os06g35060	4.16731	2.18531	1.36887	0.0178104	0.0408798	heavy metal-associated domain containing protein, expressed	Os06g0542300	OsHMP32	NA	NA	Q5Z6Y0	Q5Z6Y0_ORYSJ	unreviewed	Os06g0542300 protein (cDNA, clone: J100052L04, full insert sequence)	Os06g0542300 OSNPB_060542300	metal ion binding [GO:0046872]; metal ion transport [GO:0030001]		osa:4341233;	PF00403;
5	LOC_Os02g37300	99.6707	2.00048	0.651837	0.000342939	0.00122948	heavy metal associated domain containing protein, expressed	Os02g0584800	OsHMP15	NA	NA	Q6YY33	Q6YY33_ORYSJ	unreviewed	Os02g0584800 protein (cDNA, clone: J100074H07, full insert sequence)	Os02g0584800 OSNPB_020584800	metal ion binding [GO:0046872]; metal ion transport [GO:0030001]		osa:4329803;	PF00403;
6	LOC_Os10g14870	252.255	1.9131	0.241487	4.97e-16	9.18e-15	heavy metal-associated domain containing protein, expressed	Os10g0209700	OsHMP42	NA	NA	A0A5S6RAM7	A0A5S6RAM7_ORYSJ	unreviewed	Os10g0209700 protein (Putative ATFP3)	Os10g0209700 OsJ_15324 OSJNBa0082N11.9	metal ion binding [GO:0046872]; metal ion transport [GO:0030001]		osa:4348282;	PF00403;
7	LOC_Os04g17100	544.703	1.79588	0.447112	1.38e-05	6.49e-05	heavy metal-associated domain containing protein, expressed	Os04g0244800	OsHMP24	NA	NA	Q7XWS9	Q7XWS9_ORYSJ	unreviewed	Os04g0244800 protein (cDNA clone:J023150J09, full insert sequence)	Os04g0244800 OSNPB_040244800	metal ion binding [GO:0046872]; metal ion transport [GO:0030001]		osa:4335295;	PF00403;
8	LOC_Os08g10480	601.327	1.67623	0.244043	1.89e-12	2.35e-11	heavy metal-associated domain containing protein, expressed	Os08g0205400	OsATX1, OsHMP37, HMP37	NA	NA	A3BQM1	A3BQM1_ORYSJ	unreviewed	Os08g0205400 protein (Putative copper chaperone)	Os08g0205400 OJ1119_C05.6 OsJ_26405 P0486F07.35	metal ion binding [GO:0046872]; metal ion transport [GO:0030001]		osa:4344925;	PF00403;
9	LOC_Os10g30450	144.643	0.894665	0.363514	0.00825906	0.0209269	heavy-metal-associated domain-containing protein, putative, expressed	Os10g0440500	OsHMP43	NA	NA	Q7XE25	Q7XE25_ORYSJ	unreviewed	Heavy metal-associated domain containing protein, expressed	LOC_Os10g30450	metal ion binding [GO:0046872]; metal ion transport [GO:0030001]		osa:4348724;	PF00403;
10	LOC_Os03g08070	667.152	-0.582739	0.193578	0.00197477	0.00595623	copper-transporting ATPase PAA1, putative, expressed	Os03g0178100	OsHMA6, osHMA8, HMA6, OsHMP20, HMP20	NA	NA	Q10QZ3	Q10QZ3_ORYSJ	unreviewed	Copper-translocating P-type ATPase family protein, expressed	LOC_Os03g08070	integral component of membrane [GO:0016021]; ATP binding [GO:0005524]; ATPase-coupled cation transmembrane transporter activity [GO:0019829]; metal ion binding [GO:0046872]; metal ion transport [GO:0030001]	SUBCELLULAR LOCATION: Membrane {ECO:0000256|RuleBase:RU362081}.		PF00403;
11	LOC_Os03g08070	667.152	-0.582739	0.193578	0.00197477	0.00595623	copper-transporting ATPase PAA1, putative, expressed	Os03g0178100	OsHMA6, osHMA8, HMA6, OsHMP20, HMP20	NA	NA	Q10QZ2	Q10QZ2_ORYSJ	unreviewed	Copper-translocating P-type ATPase family protein, expressed	LOC_Os03g08070	integral component of membrane [GO:0016021]; ATP binding [GO:0005524]; ATPase-coupled cation transmembrane transporter activity [GO:0019829]; metal ion binding [GO:0046872]; metal ion transport [GO:0030001]	SUBCELLULAR LOCATION: Membrane {ECO:0000256|RuleBase:RU362081}.		PF00403;
12	LOC_Os02g07630	493.771	-1.07605	0.159872	9.34e-12	1.07e-10	copper-transporting ATPase, putative, expressed	Os02g0172600	OsHMA5, osHMA6, HMA5, OsHMP11, HMP11	NA	NA	Q6H6Z1	Q6H6Z1_ORYSJ	unreviewed	Putative copper-exporting ATPase	P0030G02.51	integral component of membrane [GO:0016021]; ATP binding [GO:0005524]; ATPase-coupled cation transmembrane transporter activity [GO:0019829]; copper ion binding [GO:0005507]; metal ion transport [GO:0030001]	SUBCELLULAR LOCATION: Membrane {ECO:0000256|RuleBase:RU362081}.		PF00403;
13	LOC_Os02g10290	954.467	-1.15532	0.238311	6.3e-07	3.73e-06	copper-transporting ATPase, putative, expressed	Os02g0196600	OsHMA7, osHMA4, HMA7, OsHMP12, HMP12	NA	NA	Q6H7M3	HMA4_ORYSJ	reviewed	Copper-transporting ATPase HMA4 (EC 7.2.2.8) (Protein HEAVY METAL ATPASE 4) (OsHMA4)	HMA4 Os02g0196600 LOC_Os02g10290 OJ1225_F07.30 OJ1524_D08.15 OsJ_05752	integral component of membrane [GO:0016021]; vacuolar membrane [GO:0005774]; ATP binding [GO:0005524]; ATPase-coupled cation transmembrane transporter activity [GO:0019829]; copper ion binding [GO:0005507]; metal ion transport [GO:0030001]	SUBCELLULAR LOCATION: Vacuole membrane {ECO:0000269|PubMed:27387148}; Multi-pass membrane protein {ECO:0000255}.	osa:4328616;	PF00403;
14	LOC_Os04g46940	107.903	-2.25643	0.320904	3.27e-13	4.45e-12	copper-transporting ATPase 3, putative, expressed	Os04g0556000	OsHMA8, osHMA5, HMA8, OsHMP27, HMP27	NA	NA	A3AWA4	HMA5_ORYSJ	reviewed	Copper-transporting ATPase HMA5 (EC 7.2.2.8) (Protein HEAVY METAL ATPASE 5) (OsHMA5)	HMA5 Os04g0556000 LOC_Os04g46940 OsJ_15734 OSJNBb0012E24.8	integral component of membrane [GO:0016021]; plasma membrane [GO:0005886]; ATP binding [GO:0005524]; ATPase-coupled cation transmembrane transporter activity [GO:0019829]; copper ion binding [GO:0005507]; detoxification of copper ion [GO:0010273]; metal ion transport [GO:0030001]	SUBCELLULAR LOCATION: Cell membrane {ECO:0000269|PubMed:24064929}; Multi-pass membrane protein {ECO:0000255}.	osa:4336625;	PF00403;
15	LOC_Os08g31140	62.0053	-2.26801	0.575148	1.28e-05	6.05e-05	heavy metal-associated domain containing protein, expressed	Os08g0403300	OsHMP39	NA	NA	Q6Z273	Q6Z273_ORYSJ	unreviewed	Os08g0403300 protein	Os08g0403300 OSNPB_080403300	metal ion binding [GO:0046872]; metal ion transport [GO:0030001]		osa:4345520;	PF00403;
16	LOC_Os01g03490	104.251	-2.34836	0.512818	6.88e-07	4.06e-06	heavy-metal-associated domain-containing protein, putative, expressed	Os01g0125600	OsHMP1, OsHMP01	NA	NA	Q0JR23	Q0JR23_ORYSJ	unreviewed	Os01g0125600 protein	Os01g0125600 P0037C04.32	metal ion binding [GO:0046872]; metal ion transport [GO:0030001]		osa:4326005;	PF00403;
17	LOC_Os02g30650	295.496	-2.43791	0.350146	4.77e-13	6.37e-12	heavy metal-associated domain containing protein, expressed	Os02g0510600	OsHMP13	NA	NA	B9F070	B9F070_ORYSJ	unreviewed	HMA domain-containing protein	OsJ_06872	metal ion binding [GO:0046872]; metal ion transport [GO:0030001]			PF00403;
18	LOC_Os02g30650	295.496	-2.43791	0.350146	4.77e-13	6.37e-12	heavy metal-associated domain containing protein, expressed	Os02g0510600	OsHMP13	NA	NA	Q6K793	Q6K793_ORYSJ	unreviewed	Os02g0510600 protein	Os02g0510600 OSNPB_020510600	metal ion binding [GO:0046872]; metal ion transport [GO:0030001]		osa:4329453;	PF00403;
19	LOC_Os02g32814	663.802	-2.76954	0.473262	5.46e-10	5.07e-09	heavy metal-associated domain containing protein, expressed	Os02g0530100	OsATX1, CCH, ATX1, OsHMP14, HMP14	NA	NA	A0A0P0VJT1	A0A0P0VJT1_ORYSJ	unreviewed	Os02g0530100 protein (Fragment)	Os02g0530100 OSNPB_020530100	metal ion binding [GO:0046872]; metal ion transport [GO:0030001]			PF00403;
20	LOC_Os01g52160	22.1528	-3.0112	0.548795	5.31e-09	4.31e-08	heavy metal-associated domain containing protein, expressed	Os01g0719600	OsHMP5, OsHMP05	NA	NA	Q5JL91	Q5JL91_ORYSJ	unreviewed	Os01g0719600 protein (cDNA clone:J023077M05, full insert sequence)	Os01g0719600 OSNPB_010719600	metal ion binding [GO:0046872]; metal ion transport [GO:0030001]		osa:4324699;	PF00403;
21	LOC_Os08g31340	16.3148	-3.07286	0.780646	1.08e-05	5.2e-05	heavy metal-associated domain containing protein, expressed	Os08g0405700	OsHMP40	NA	NA	A0A0P0XG11	A0A0P0XG11_ORYSJ	unreviewed	Os08g0405700 protein	Os08g0405700 OsJ_27250 P0685B10.33	metal ion binding [GO:0046872]; metal ion transport [GO:0030001]		osa:4345527;	PF00403;
22	LOC_Os04g32850	1784.8	-3.13348	0.477614	5.29e-12	6.23e-11	basic proline-rich protein, putative, expressed	Os04g0401000	pi21, rMg40, OsHMP26, HMP26	NA	NA	Q7XL73	PI21_ORYSJ	reviewed	Protein PYRICULARIA ORYZAE RESISTANCE 21 (Pi21)	PI21 rMg40 LOC_Os04g32850 Os04g0401000 OsJ_14657 OSJNBb0014D23.16 OSNPB_040401000	metal ion binding [GO:0046872]; defense response [GO:0006952]; regulation of defense response to fungus [GO:1900150]; response to parasitic fungus [GO:0009623]		osa:4335725;
23	LOC_Os01g70240	249.623	-3.66013	0.283851	5.67e-39	5.58e-37	expressed protein	Os01g0927300	OsHMP8, OsHMP08	NA	NA	Q5JK04	Q5JK04_ORYSJ	unreviewed	Os01g0927300 protein (cDNA clone:J033021C11, full insert sequence)	Os01g0927300 OSNPB_010927300	metal ion binding [GO:0046872]; metal ion transport [GO:0030001]			PF00403;
24	LOC_Os11g05010	80.596	-3.89594	0.593381	4.65e-12	5.5e-11	heavy-metal-associated domain-containing protein, putative, expressed	Os11g0147500	OsHMP45	NA	NA	A3C8M1	A3C8M1_ORYSJ	unreviewed	Os11g0147500 protein	Os11g0147500 OsJ_32960	metal ion binding [GO:0046872]; metal ion transport [GO:0030001]		osa:4349767;	PF00403;
25	LOC_Os04g32030	148.339	-5.05603	0.48906	3.18e-26	1.38e-24	heavy metal-associated domain containing protein, expressed	Os04g0390100	OsHMP25	NA	NA	A0A0P0W9Z3	A0A0P0W9Z3_ORYSJ	unreviewed	OSJNBa0053B21.14 protein	OSJNBa0053B21.14	metal ion binding [GO:0046872]; metal ion transport [GO:0030001]			PF00403;
26	LOC_Os12g05040	45.9452	-7.6847	1.23734	3.68e-10	3.49e-09	heavy-metal-associated domain-containing protein, putative, expressed	Os12g0144600	OsHMP46	NA	NA	Q2QXS5	Q2QXS5_ORYSJ	unreviewed	Heavy metal-associated domain containing protein, expressed	LOC_Os12g05040	metal ion binding [GO:0046872]; metal ion transport [GO:0030001]			PF00403;
27	LOC_Os07g47480	68.6946	-11.4045	3.10582	6.82e-17	1.34e-15	heavy metal-associated domain containing protein, expressed	Os07g0671400	OsHMP36	NA	NA	A3BNA4	A3BNA4_ORYSJ	unreviewed	HMA domain-containing protein	OsJ_25529	metal ion binding [GO:0046872]; metal ion transport [GO:0030001]		osa:4344246;	PF00403;
28	LOC_Os07g47480	68.6946	-11.4045	3.10582	6.82e-17	1.34e-15	heavy metal-associated domain containing protein, expressed	Os07g0671400	OsHMP36	NA	NA	A0A0P0XAA3	A0A0P0XAA3_ORYSJ	unreviewed	Os07g0671400 protein	Os07g0671400	metal ion binding [GO:0046872]; metal ion transport [GO:0030001]			PF00403;

## Sheet: MRP_root
Sl no	MRP	baseMean	log2FoldChange	lfcSE	pvalue	padj	MSU_annotation	RAPD	Oryzabase_symbol	Custom.Annot	References	UNIPROT	Uniprot.Entry.name	Status	Protein.names	Gene.names	Gene.ontology..GO.	Subcellular.location..CC.	Cross.reference..KEGG.	Cross.reference..Pfam.
1	LOC_Os11g05700	464.356	2.63439	0.208832	1.74e-37	4.32e-35	ABC transporter family protein, putative, expressed	Os11g0155600	OsABCC16, OsMRP16			Q53QH6	Q53QH6_ORYSJ	unreviewed	ABC transporter, putative	LOC_Os11g05700 OsJ_33016	integral component of membrane [GO:0016021]; ATP binding [GO:0005524]; ATPase activity [GO:0016887]; ATPase-coupled transmembrane transporter activity [GO:0042626]			PF00664;PF00005;
2	LOC_Os04g13220	122.584	2.29577	0.249201	4.12e-21	2.58e-19	ABC transporter family protein, putative, expressed	Os04g0209300	OsABCC10, OsMRP10			Q0JES1	Q0JES1_ORYSJ	unreviewed	OSJNBb0022P19.1 protein (Os04g0209300 protein)	Os04g0209300 OSJNBb0022P19.1	integral component of membrane [GO:0016021]; membrane [GO:0016020]; plant-type vacuole [GO:0000325]; vacuolar membrane [GO:0005774]; ATP binding [GO:0005524]; ATPase activity [GO:0016887]; ATPase-coupled transmembrane transporter activity [GO:0042626]; transmembrane transport [GO:0055085]		osa:4335177;	PF00664;PF00005;
3	LOC_Os04g49890	657.875	1.7868	0.204262	3.51e-19	1.82e-17	multidrug resistance-associated protein, putative, expressed	NA	NA			B9FC70	B9FC70_ORYSJ	unreviewed	Uncharacterized protein	OsJ_15949	integral component of membrane [GO:0016021]; ATP binding [GO:0005524]; ATPase activity [GO:0016887]; ATPase-coupled transmembrane transporter activity [GO:0042626]			PF00664;PF00005;
4	LOC_Os01g07870	1534.95	1.50779	0.130523	1.45e-31	2.47e-29	ABC transporter family protein, putative, expressed	Os01g0173900	OsABCC3, OsMRP3			Q0JQA5	Q0JQA5_ORYSJ	unreviewed	Os01g0173900 protein	Os01g0173900 OSNPB_010173900	integral component of membrane [GO:0016021]; membrane [GO:0016020]; plant-type vacuole [GO:0000325]; vacuolar membrane [GO:0005774]; ATP binding [GO:0005524]; ATPase activity [GO:0016887]; ATPase-coupled transmembrane transporter activity [GO:0042626]; transmembrane transport [GO:0055085]		osa:4327122;	PF00664;PF00005;
5	LOC_Os05g10730	192.793	1.4397	0.256662	4.33e-09	6.13e-08	ABC transporter, ATP-binding protein, putative, expressed	Os05g0196100	OsABCC14, OsMRP14, OsABCC14-1, OsABCC14-2			A0A0P0WJ59	A0A0P0WJ59_ORYSJ	unreviewed	Os05g0196100 protein	Os05g0196100 OSNPB_050196100	integral component of membrane [GO:0016021]; membrane [GO:0016020]; plant-type vacuole [GO:0000325]; vacuolar membrane [GO:0005774]; ATP binding [GO:0005524]; ATPase activity [GO:0016887]; ATPase-coupled transmembrane transporter activity [GO:0042626]; transmembrane transport [GO:0055085]			PF00664;PF00005;
6	LOC_Os05g10730	192.793	1.4397	0.256662	4.33e-09	6.13e-08	ABC transporter, ATP-binding protein, putative, expressed	Os05g0196250				A0A0P0WJ59	A0A0P0WJ59_ORYSJ	unreviewed	Os05g0196100 protein	Os05g0196100 OSNPB_050196100	integral component of membrane [GO:0016021]; membrane [GO:0016020]; plant-type vacuole [GO:0000325]; vacuolar membrane [GO:0005774]; ATP binding [GO:0005524]; ATPase activity [GO:0016887]; ATPase-coupled transmembrane transporter activity [GO:0042626]; transmembrane transport [GO:0055085]			PF00664;PF00005;
7	LOC_Os12g37580	9.61557	1.24528	0.676306	0.0131932	0.0430285	ABC transporter, ATP-binding protein, putative, expressed	Os12g0562700	OsABCC17, OsMRP17			Q2QNJ9	Q2QNJ9_ORYSJ	unreviewed	Multidrug-resistance associated protein 3, putative	LOC_Os12g37580	integral component of membrane [GO:0016021]; ATP binding [GO:0005524]; ATPase activity [GO:0016887]; ATPase-coupled transmembrane transporter activity [GO:0042626]			PF00664;PF00005;
8	LOC_Os04g52900	4958.28	0.90993	0.151985	9.41e-10	1.47e-08	ABC transporter family protein, putative, expressed	Os04g0620000	OsABCC1, ABCC1, OsABCC1-1, OsABCC1-2, OsMRP1			Q7XTT6	Q7XTT6_ORYSJ	unreviewed	OSJNBa0058K23.17 protein	OSJNBa0058K23.17	integral component of membrane [GO:0016021]; ATP binding [GO:0005524]; ATPase activity [GO:0016887]; ATPase-coupled transmembrane transporter activity [GO:0042626]			PF00664;PF00005;

## Sheet: MRP_leaves_seedling
Sl No	MRP	baseMean	log2FoldChange	lfcSE	pvalue	padj	MSU_annotation	RAPD	Oryzabase_symbol	Custom.Annot	References	UNIPROT	Uniprot.Entry.name	Status	Protein.names	Gene.names	Gene.ontology..GO.	Subcellular.location..CC.	Cross.reference..KEGG.	Cross.reference..Pfam.
1	LOC_Os02g18670	26.505	2.80493	0.526133	8.53e-09	1.47e-07	ABC transporter family protein, putative, expressed	Os02g0288400	OsABCC5, OsMRP5	NA	NA	Q0E1Z1	Q0E1Z1_ORYSJ	unreviewed	Os02g0288400 protein	Os02g0288400	integral component of membrane [GO:0016021]; ATP binding [GO:0005524]; ATPase activity [GO:0016887]; ATPase-coupled transmembrane transporter activity [GO:0042626]			PF00664;PF00005;
2	LOC_Os01g07870	1960.43	2.715	0.335549	4.98e-17	3.27e-15	ABC transporter family protein, putative, expressed	Os01g0173900	OsABCC3, OsMRP3	NA	NA	Q0JQA5	Q0JQA5_ORYSJ	unreviewed	Os01g0173900 protein	Os01g0173900 OSNPB_010173900	integral component of membrane [GO:0016021]; membrane [GO:0016020]; plant-type vacuole [GO:0000325]; vacuolar membrane [GO:0005774]; ATP binding [GO:0005524]; ATPase activity [GO:0016887]; ATPase-coupled transmembrane transporter activity [GO:0042626]; transmembrane transport [GO:0055085]		osa:4327122;	PF00664;PF00005;
3	LOC_Os03g04920	1273.64	1.3523	0.287787	5.93e-07	6.81e-06	multidrug resistance-associated protein, putative, expressed	Os03g0142800	OsABCC13, OsMRP13, OsMRP5	NA	NA	Q10RX7	AB13C_ORYSJ	reviewed	ABC transporter C family member 13 (OsABCC13) (EC 7.-.-.-) (Multidrug resistance-associated protein 13) (OsMRP13) (OsMRP5) (Protein LOW PHYTIC ACID 2)	ABCC13 LPA2 Os03g0142800 LOC_Os03g04920	cell [GO:0005623]; integral component of membrane [GO:0016021]; membrane [GO:0016020]; plant-type vacuole [GO:0000325]; vacuolar membrane [GO:0005774]; ATP binding [GO:0005524]; ATPase activity [GO:0016887]; ATPase-coupled transmembrane transporter activity [GO:0042626]; sulfonylurea receptor activity [GO:0008281]; abscisic acid-activated signaling pathway involved in stomatal movement [GO:190152…	SUBCELLULAR LOCATION: Membrane {ECO:0000255}; Multi-pass membrane protein {ECO:0000255}.	osa:4331585;	PF00664;PF00005;
4	LOC_Os05g10730	1408.3	1.15089	0.237504	3.42e-07	4.16e-06	ABC transporter, ATP-binding protein, putative, expressed	Os05g0196100	OsABCC14, OsMRP14, OsABCC14-1, OsABCC14-2	NA	NA	A0A0P0WJ59	A0A0P0WJ59_ORYSJ	unreviewed	Os05g0196100 protein	Os05g0196100 OSNPB_050196100	integral component of membrane [GO:0016021]; membrane [GO:0016020]; plant-type vacuole [GO:0000325]; vacuolar membrane [GO:0005774]; ATP binding [GO:0005524]; ATPase activity [GO:0016887]; ATPase-coupled transmembrane transporter activity [GO:0042626]; transmembrane transport [GO:0055085]			PF00664;PF00005;
5	LOC_Os05g10730	1408.3	1.15089	0.237504	3.42e-07	4.16e-06	ABC transporter, ATP-binding protein, putative, expressed	Os05g0196250		NA	NA	A0A0P0WJ59	A0A0P0WJ59_ORYSJ	unreviewed	Os05g0196100 protein	Os05g0196100 OSNPB_050196100	integral component of membrane [GO:0016021]; membrane [GO:0016020]; plant-type vacuole [GO:0000325]; vacuolar membrane [GO:0005774]; ATP binding [GO:0005524]; ATPase activity [GO:0016887]; ATPase-coupled transmembrane transporter activity [GO:0042626]; transmembrane transport [GO:0055085]			PF00664;PF00005;
6	LOC_Os04g13220	270.11	0.814418	0.223446	0.000132995	0.00083114	ABC transporter family protein, putative, expressed	Os04g0209300	OsABCC10, OsMRP10	NA	NA	Q0JES1	Q0JES1_ORYSJ	unreviewed	OSJNBb0022P19.1 protein (Os04g0209300 protein)	Os04g0209300 OSJNBb0022P19.1	integral component of membrane [GO:0016021]; membrane [GO:0016020]; plant-type vacuole [GO:0000325]; vacuolar membrane [GO:0005774]; ATP binding [GO:0005524]; ATPase activity [GO:0016887]; ATPase-coupled transmembrane transporter activity [GO:0042626]; transmembrane transport [GO:0055085]		osa:4335177;	PF00664;PF00005;
7	LOC_Os04g52900	5821.63	0.322885	0.108187	0.00245021	0.0105289	ABC transporter family protein, putative, expressed	Os04g0620000	OsABCC1, ABCC1, OsABCC1-1, OsABCC1-2, OsMRP1	NA	NA	Q7XTT6	Q7XTT6_ORYSJ	unreviewed	OSJNBa0058K23.17 protein	OSJNBa0058K23.17	integral component of membrane [GO:0016021]; ATP binding [GO:0005524]; ATPase activity [GO:0016887]; ATPase-coupled transmembrane transporter activity [GO:0042626]			PF00664;PF00005;
8	LOC_Os06g08560	206.652	-1.02163	0.150223	3.66e-12	1.17e-10	multidrug resistance-associated protein 11, putative, expressed	Os06g0184700	OsABCC12, OsMRP12	NA	NA	B9FRW1	B9FRW1_ORYSJ	unreviewed	Uncharacterized protein	OsJ_20370	integral component of membrane [GO:0016021]; ATP binding [GO:0005524]; ATPase activity [GO:0016887]; ATPase-coupled transmembrane transporter activity [GO:0042626]			PF00664;PF00005;
9	LOC_Os06g08560	206.652	-1.02163	0.150223	3.66e-12	1.17e-10	multidrug resistance-associated protein 11, putative, expressed	Os06g0184766		NA	NA	B9FRW1	B9FRW1_ORYSJ	unreviewed	Uncharacterized protein	OsJ_20370	integral component of membrane [GO:0016021]; ATP binding [GO:0005524]; ATPase activity [GO:0016887]; ATPase-coupled transmembrane transporter activity [GO:0042626]			PF00664;PF00005;
10	LOC_Os04g49890	358.883	-1.34778	0.291793	8.47e-07	9.39e-06	multidrug resistance-associated protein, putative, expressed	NA	NA	NA	NA	B9FC70	B9FC70_ORYSJ	unreviewed	Uncharacterized protein	OsJ_15949	integral component of membrane [GO:0016021]; ATP binding [GO:0005524]; ATPase activity [GO:0016887]; ATPase-coupled transmembrane transporter activity [GO:0042626]			PF00664;PF00005;
11	LOC_Os06g36650	5.16944	-2.27347	1.47512	0.0101672	0.0348657	ABC transporter family protein, putative, expressed	Os06g0561800	OsABCC11, OsMRP11	NA	NA	C7J4D9	C7J4D9_ORYSJ	unreviewed	Os06g0561800 protein	Os06g0561800	integral component of membrane [GO:0016021]; ATP binding [GO:0005524]; ATPase activity [GO:0016887]; ATPase-coupled transmembrane transporter activity [GO:0042626]			PF00664;PF00005;

## Sheet: MRP_leaves_mature
Sl No	MRP	baseMean	log2FoldChange	lfcSE	pvalue	padj	MSU_annotation	RAPD	Oryzabase_symbol	Custom.Annot	References	UNIPROT	Uniprot.Entry.name	Status	Protein.names	Gene.names	Gene.ontology..GO.	Subcellular.location..CC.	Cross.reference..KEGG.	Cross.reference..Pfam.
1	LOC_Os02g18670	26.505	4.59084	1.30722	4.11e-05	0.000178689	ABC transporter family protein, putative, expressed	Os02g0288400	OsABCC5, OsMRP5	NA	NA	Q0E1Z1	Q0E1Z1_ORYSJ	unreviewed	Os02g0288400 protein	Os02g0288400	integral component of membrane [GO:0016021]; ATP binding [GO:0005524]; ATPase activity [GO:0016887]; ATPase-coupled transmembrane transporter activity [GO:0042626]			PF00664;PF00005;
2	LOC_Os04g13220	270.11	4.16799	0.285491	3.9e-49	6.95e-47	ABC transporter family protein, putative, expressed	Os04g0209300	OsABCC10, OsMRP10	NA	NA	Q0JES1	Q0JES1_ORYSJ	unreviewed	OSJNBb0022P19.1 protein (Os04g0209300 protein)	Os04g0209300 OSJNBb0022P19.1	integral component of membrane [GO:0016021]; membrane [GO:0016020]; plant-type vacuole [GO:0000325]; vacuolar membrane [GO:0005774]; ATP binding [GO:0005524]; ATPase activity [GO:0016887]; ATPase-coupled transmembrane transporter activity [GO:0042626]; transmembrane transport [GO:0055085]		osa:4335177;	PF00664;PF00005;
3	LOC_Os11g05700	479.557	3.8588	0.40809	3.71e-22	1.16e-20	ABC transporter family protein, putative, expressed	Os11g0155600	OsABCC16, OsMRP16	NA	NA	Q53QH6	Q53QH6_ORYSJ	unreviewed	ABC transporter, putative	LOC_Os11g05700 OsJ_33016	integral component of membrane [GO:0016021]; ATP binding [GO:0005524]; ATPase activity [GO:0016887]; ATPase-coupled transmembrane transporter activity [GO:0042626]			PF00664;PF00005;
4	LOC_Os05g10730	1408.3	3.69729	0.24791	2.02e-51	4.06e-49	ABC transporter, ATP-binding protein, putative, expressed	Os05g0196100	OsABCC14, OsMRP14, OsABCC14-1, OsABCC14-2	NA	NA	A0A0P0WJ59	A0A0P0WJ59_ORYSJ	unreviewed	Os05g0196100 protein	Os05g0196100 OSNPB_050196100	integral component of membrane [GO:0016021]; membrane [GO:0016020]; plant-type vacuole [GO:0000325]; vacuolar membrane [GO:0005774]; ATP binding [GO:0005524]; ATPase activity [GO:0016887]; ATPase-coupled transmembrane transporter activity [GO:0042626]; transmembrane transport [GO:0055085]			PF00664;PF00005;
5	LOC_Os05g10730	1408.3	3.69729	0.24791	2.02e-51	4.06e-49	ABC transporter, ATP-binding protein, putative, expressed	Os05g0196250		NA	NA	A0A0P0WJ59	A0A0P0WJ59_ORYSJ	unreviewed	Os05g0196100 protein	Os05g0196100 OSNPB_050196100	integral component of membrane [GO:0016021]; membrane [GO:0016020]; plant-type vacuole [GO:0000325]; vacuolar membrane [GO:0005774]; ATP binding [GO:0005524]; ATPase activity [GO:0016887]; ATPase-coupled transmembrane transporter activity [GO:0042626]; transmembrane transport [GO:0055085]			PF00664;PF00005;
6	LOC_Os01g07870	1960.43	2.58163	0.341782	6.05e-15	9.99e-14	ABC transporter family protein, putative, expressed	Os01g0173900	OsABCC3, OsMRP3	NA	NA	Q0JQA5	Q0JQA5_ORYSJ	unreviewed	Os01g0173900 protein	Os01g0173900 OSNPB_010173900	integral component of membrane [GO:0016021]; membrane [GO:0016020]; plant-type vacuole [GO:0000325]; vacuolar membrane [GO:0005774]; ATP binding [GO:0005524]; ATPase activity [GO:0016887]; ATPase-coupled transmembrane transporter activity [GO:0042626]; transmembrane transport [GO:0055085]		osa:4327122;	PF00664;PF00005;
7	LOC_Os12g37580	20.7176	1.37484	0.482927	0.00161967	0.00499117	ABC transporter, ATP-binding protein, putative, expressed	Os12g0562700	OsABCC17, OsMRP17	NA	NA	Q2QNJ9	Q2QNJ9_ORYSJ	unreviewed	Multidrug-resistance associated protein 3, putative	LOC_Os12g37580	integral component of membrane [GO:0016021]; ATP binding [GO:0005524]; ATPase activity [GO:0016887]; ATPase-coupled transmembrane transporter activity [GO:0042626]			PF00664;PF00005;
8	LOC_Os04g52900	5821.63	0.902801	0.10743	2.58e-17	5.29e-16	ABC transporter family protein, putative, expressed	Os04g0620000	OsABCC1, ABCC1, OsABCC1-1, OsABCC1-2, OsMRP1	NA	NA	Q7XTT6	Q7XTT6_ORYSJ	unreviewed	OSJNBa0058K23.17 protein	OSJNBa0058K23.17	integral component of membrane [GO:0016021]; ATP binding [GO:0005524]; ATPase activity [GO:0016887]; ATPase-coupled transmembrane transporter activity [GO:0042626]			PF00664;PF00005;
9	LOC_Os06g08560	206.652	0.610653	0.150234	3.99e-05	0.000173738	multidrug resistance-associated protein 11, putative, expressed	Os06g0184700	OsABCC12, OsMRP12	NA	NA	B9FRW1	B9FRW1_ORYSJ	unreviewed	Uncharacterized protein	OsJ_20370	integral component of membrane [GO:0016021]; ATP binding [GO:0005524]; ATPase activity [GO:0016887]; ATPase-coupled transmembrane transporter activity [GO:0042626]			PF00664;PF00005;
10	LOC_Os06g08560	206.652	0.610653	0.150234	3.99e-05	0.000173738	multidrug resistance-associated protein 11, putative, expressed	Os06g0184766		NA	NA	B9FRW1	B9FRW1_ORYSJ	unreviewed	Uncharacterized protein	OsJ_20370	integral component of membrane [GO:0016021]; ATP binding [GO:0005524]; ATPase activity [GO:0016887]; ATPase-coupled transmembrane transporter activity [GO:0042626]			PF00664;PF00005;
11	LOC_Os04g49890	358.883	-0.731233	0.28697	0.00769683	0.0196453	multidrug resistance-associated protein, putative, expressed	NA	NA	NA	NA	B9FC70	B9FC70_ORYSJ	unreviewed	Uncharacterized protein	OsJ_15949	integral component of membrane [GO:0016021]; ATP binding [GO:0005524]; ATPase activity [GO:0016887]; ATPase-coupled transmembrane transporter activity [GO:0042626]			PF00664;PF00005;
12	LOC_Os06g06440	128.223	-3.29806	0.701513	2.24e-07	1.43e-06	ABC transporter, ATP-binding protein, putative, expressed	Os06g0158900	OsABCC15, OsMRP15	NA	NA	A0A0N7KLK4	A0A0N7KLK4_ORYSJ	unreviewed	Os06g0158900 protein	Os06g0158900 OSNPB_060158900	integral component of membrane [GO:0016021]; membrane [GO:0016020]; plant-type vacuole [GO:0000325]; vacuolar membrane [GO:0005774]; ATP binding [GO:0005524]; ATPase activity [GO:0016887]; ATPase-coupled transmembrane transporter activity [GO:0042626]; transmembrane transport [GO:0055085]		osa:4340195;	PF00664;PF00005;

## Sheet: MTP_root
Sl No	MTP	baseMean	log2FoldChange	lfcSE	pvalue	padj	MSU_annotation	RAPD	Oryzabase_symbol	Custom.Annot	References	UNIPROT	Uniprot.Entry.name	Status	Protein.names	Gene.names	Gene.ontology..GO.	Subcellular.location..CC.	Cross.reference..KEGG.	Cross.reference..Pfam.
1	LOC_Os03g12530	211.414	0.823119	0.242026	0.000328703	0.00182025	cation efflux family protein, putative, expressed	Os03g0226400	OsMTP8.1			Q10PP8	MTP4_ORYSJ	reviewed	Metal tolerance protein 4 (OsMTP4)	MTP4 Os03g0226400 LOC_Os03g12530 OsJ_09993 OSJNBa0081P02.21	cell [GO:0005623]; integral component of membrane [GO:0016021]; membrane [GO:0016020]; plasma membrane [GO:0005886]; vacuolar membrane [GO:0005774]; cadmium ion transmembrane transporter activity [GO:0015086]; cation transmembrane transporter activity [GO:0008324]; ferrous iron transmembrane transporter activity [GO:0015093]; manganese ion transmembrane transporter activity [GO:0005384]; zinc eff…	SUBCELLULAR LOCATION: Vacuole membrane {ECO:0000250}; Multi-pass membrane protein {ECO:0000250}. Note=Tonoplast.	osa:4332125;	PF01545;PF16916;
2	LOC_Os05g03780	675.221	-0.769157	0.211694	0.000146805	0.000887506	cation efflux family protein, putative, expressed	Os05g0128400	OsMTP1			Q688R1	MTP1_ORYSJ	reviewed	Metal tolerance protein 1 (OsMTP1)	MTP1 Os05g0128400 LOC_Os05g03780 OsJ_16988 OSJNBa0056I11.9	integral component of membrane [GO:0016021]; plant-type vacuole [GO:0000325]; vacuolar membrane [GO:0005774]; vacuole [GO:0005773]; cation transmembrane transporter activity [GO:0008324]; zinc ion transport [GO:0006829]	SUBCELLULAR LOCATION: Vacuole membrane {ECO:0000250}; Multi-pass membrane protein {ECO:0000250}. Note=Tonoplast.	osa:4337694;	PF01545;

## Sheet: MTP_leaves_seedling
Sl No	MTP	baseMean	log2FoldChange	lfcSE	pvalue	padj	MSU_annotation	RAPD	Oryzabase_symbol	Custom.Annot	References	UNIPROT	Uniprot.Entry.name	Status	Protein.names	Gene.names	Gene.ontology..GO.	Subcellular.location..CC.	Cross.reference..KEGG.	Cross.reference..Pfam.
1	LOC_Os01g03914	727.517	2.5726	0.340897	4.11e-15	2.07e-13	cation efflux family protein, putative, expressed	Os01g0130000	OsMTP9	NA	NA	Q9LDU0	MTP7_ORYSJ	reviewed	Metal tolerance protein 7 (OsMTP7)	MTP7 Os01g0130000 LOC_Os01g03914 OsJ_00239 P0408F06.28 P0504H10.3	cell [GO:0005623]; integral component of membrane [GO:0016021]; membrane [GO:0016020]; plasma membrane [GO:0005886]; vacuolar membrane [GO:0005774]; cadmium ion transmembrane transporter activity [GO:0015086]; cation transmembrane transporter activity [GO:0008324]; ferrous iron transmembrane transporter activity [GO:0015093]; zinc efflux active transmembrane transporter activity [GO:0015341]; cad…	SUBCELLULAR LOCATION: Vacuole membrane {ECO:0000250}; Multi-pass membrane protein {ECO:0000250}. Note=Tonoplast.	osa:4325974;	PF01545;PF16916;
2	LOC_Os03g22550	87.6602	-0.519651	0.216388	0.0118363	0.0395219	cation efflux family protein, putative, expressed	Os03g0346800	OsMTP6	NA	NA	Q10LJ2	MTP2_ORYSJ	reviewed	Metal tolerance protein 2 (OsMTP2)	MTP2 Os03g0346800 LOC_Os03g22550 OsJ_10821	cell [GO:0005623]; integral component of membrane [GO:0016021]; membrane [GO:0016020]; plasma membrane [GO:0005886]; vacuolar membrane [GO:0005774]; cadmium ion transmembrane transporter activity [GO:0015086]; cation transmembrane transporter activity [GO:0008324]; ferrous iron transmembrane transporter activity [GO:0015093]; zinc efflux active transmembrane transporter activity [GO:0015341]; cad…	SUBCELLULAR LOCATION: Vacuole membrane {ECO:0000250}; Multi-pass membrane protein {ECO:0000250}. Note=Tonoplast.		PF01545;PF16916;
3	LOC_Os03g12530	841.17	-1.30419	0.350716	4.28e-05	0.000309547	cation efflux family protein, putative, expressed	Os03g0226400	OsMTP8.1	NA	NA	Q10PP8	MTP4_ORYSJ	reviewed	Metal tolerance protein 4 (OsMTP4)	MTP4 Os03g0226400 LOC_Os03g12530 OsJ_09993 OSJNBa0081P02.21	cell [GO:0005623]; integral component of membrane [GO:0016021]; membrane [GO:0016020]; plasma membrane [GO:0005886]; vacuolar membrane [GO:0005774]; cadmium ion transmembrane transporter activity [GO:0015086]; cation transmembrane transporter activity [GO:0008324]; ferrous iron transmembrane transporter activity [GO:0015093]; manganese ion transmembrane transporter activity [GO:0005384]; zinc eff…	SUBCELLULAR LOCATION: Vacuole membrane {ECO:0000250}; Multi-pass membrane protein {ECO:0000250}. Note=Tonoplast.	osa:4332125;	PF01545;PF16916;
4	LOC_Os02g53490	146.289	-1.37526	0.218808	7.03e-11	1.79e-09	cation efflux family protein, putative, expressed	Os02g0775100	OsMTP8, MTP8.2, OsMTP8.2	NA	NA	Q6Z7K5	MTP3_ORYSJ	reviewed	Metal tolerance protein 3 (OsMTP3)	MTP3 Os02g0775100 LOC_Os02g53490 OJ1448_G06.19 OsJ_08570	cell [GO:0005623]; integral component of membrane [GO:0016021]; membrane [GO:0016020]; plasma membrane [GO:0005886]; vacuolar membrane [GO:0005774]; cadmium ion transmembrane transporter activity [GO:0015086]; cation transmembrane transporter activity [GO:0008324]; ferrous iron transmembrane transporter activity [GO:0015093]; manganese ion transmembrane transporter activity [GO:0005384]; zinc eff…	SUBCELLULAR LOCATION: Vacuole membrane {ECO:0000250}; Multi-pass membrane protein {ECO:0000250}. Note=Tonoplast.	osa:4330894;	PF01545;PF16916;

## Sheet: MTP_leaves_mature
Sl No	MTP	baseMean	log2FoldChange	lfcSE	pvalue	padj	MSU_annotation	RAPD	Oryzabase_symbol	Custom.Annot	References	UNIPROT	Uniprot.Entry.name	Status	Protein.names	Gene.names	Gene.ontology..GO.	Subcellular.location..CC.	Cross.reference..KEGG.	Cross.reference..Pfam.
1	LOC_Os01g62070	724.626	2.25111	0.191683	1.77e-32	1.2e-30	cation efflux family protein, putative, expressed	Os01g0837800	OsMTP11	NA	NA	Q5NA18	MTP5_ORYSJ	reviewed	Metal tolerance protein 5 (OsMTP5)	MTP5 Os01g0837800 LOC_Os01g62070 OsJ_04008 P0031D11.3	cell [GO:0005623]; integral component of membrane [GO:0016021]; membrane [GO:0016020]; plasma membrane [GO:0005886]; vacuolar membrane [GO:0005774]; cadmium ion transmembrane transporter activity [GO:0015086]; cation transmembrane transporter activity [GO:0008324]; ferrous iron transmembrane transporter activity [GO:0015093]; manganese:proton antiporter activity [GO:0010486]; zinc efflux active t…	SUBCELLULAR LOCATION: Vacuole membrane {ECO:0000250}; Multi-pass membrane protein {ECO:0000250}. Note=Tonoplast.	osa:4327371;	PF01545;PF16916;
2	LOC_Os05g03780	682.937	-0.529066	0.171249	0.00168135	0.00515546	cation efflux family protein, putative, expressed	Os05g0128400	OsMTP1	NA	NA	Q688R1	MTP1_ORYSJ	reviewed	Metal tolerance protein 1 (OsMTP1)	MTP1 Os05g0128400 LOC_Os05g03780 OsJ_16988 OSJNBa0056I11.9	integral component of membrane [GO:0016021]; plant-type vacuole [GO:0000325]; vacuolar membrane [GO:0005774]; vacuole [GO:0005773]; cation transmembrane transporter activity [GO:0008324]; zinc ion transport [GO:0006829]	SUBCELLULAR LOCATION: Vacuole membrane {ECO:0000250}; Multi-pass membrane protein {ECO:0000250}. Note=Tonoplast.	osa:4337694;	PF01545;
3	LOC_Os02g58580	148.514	-0.695033	0.214647	0.000907284	0.00296535	cation efflux family protein, putative, expressed	Os02g0832700	OsMTP5	NA	NA	Q6ESC2	Q6ESC2_ORYSJ	unreviewed	Cation efflux family protein-like (Os02g0832700 protein)	OJ1149_C12.26-1 Os02g0832700 OJ1282_E10.2-1	Golgi apparatus [GO:0005794]; integral component of membrane [GO:0016021]; cation transmembrane transporter activity [GO:0008324]; response to nematode [GO:0009624]			PF01545;
4	LOC_Os03g12530	841.17	-2.91839	0.363434	1.01e-16	1.96e-15	cation efflux family protein, putative, expressed	Os03g0226400	OsMTP8.1	NA	NA	Q10PP8	MTP4_ORYSJ	reviewed	Metal tolerance protein 4 (OsMTP4)	MTP4 Os03g0226400 LOC_Os03g12530 OsJ_09993 OSJNBa0081P02.21	cell [GO:0005623]; integral component of membrane [GO:0016021]; membrane [GO:0016020]; plasma membrane [GO:0005886]; vacuolar membrane [GO:0005774]; cadmium ion transmembrane transporter activity [GO:0015086]; cation transmembrane transporter activity [GO:0008324]; ferrous iron transmembrane transporter activity [GO:0015093]; manganese ion transmembrane transporter activity [GO:0005384]; zinc eff…	SUBCELLULAR LOCATION: Vacuole membrane {ECO:0000250}; Multi-pass membrane protein {ECO:0000250}. Note=Tonoplast.	osa:4332125;	PF01545;PF16916;

## Sheet: NRAMP_root
Sl No	NRAMP	baseMean	log2FoldChange	lfcSE	pvalue	padj	MSU_annotation	RAPD	Oryzabase_symbol	Custom.Annot	References	UNIPROT	Uniprot.Entry.name	Status	Protein.names	Gene.names	Gene.ontology..GO.	Subcellular.location..CC.	Cross.reference..KEGG.	Cross.reference..Pfam.
1	LOC_Os03g11010	165.828	0.5881	0.24767	0.0117626	0.0390966	natural resistance-associated macrophage protein, putative, expressed	Os03g0208500	OsNramp2, OsNRAMP2			Q10Q65	NRAM2_ORYSJ	reviewed	Metal transporter Nramp2 (OsNramp2)	NRAMP2 Os03g0208500 LOC_Os03g11010 OSJNBa0014O06.13	integral component of membrane [GO:0016021]; cadmium ion transmembrane transporter activity [GO:0015086]; manganese ion transmembrane transporter activity [GO:0005384]; iron ion homeostasis [GO:0055072]	SUBCELLULAR LOCATION: Membrane {ECO:0000305}; Multi-pass membrane protein {ECO:0000305}.	osa:4332012;	PF01566;
2	LOC_Os06g46310	323.743	0.39822	0.152212	0.00750563	0.0269425	metal transporter Nramp6, putative, expressed	Os06g0676000	OsNramp3, OsNRAMP3			T2HST0	T2HST0_ORYSJ	unreviewed	Metal transporter Nramp3	OsNramp3	integral component of membrane [GO:0016021]; metal ion transmembrane transporter activity [GO:0046873]		osa:9267339;	PF01566;
3	LOC_Os07g15370	506.105	-1.01028	0.168814	8.23e-10	1.3e-08	metal transporter Nramp6, putative, expressed	Os07g0257200	NRAMP5, OsNRAMP5, OsNramp5, OsLCD1			I7GYG6	I7GYG6_ORYSJ	unreviewed	Nramp metal transporter	OsNramp5	integral component of membrane [GO:0016021]; metal ion transmembrane transporter activity [GO:0046873]		osa:4342859;	PF01566;
4	LOC_Os02g03900	270.465	-1.31186	0.219095	5.26e-10	8.58e-09	metal transporter Nramp6, putative, expressed	Os02g0131800	OsNRAMP4, Nrat1, Nramp6, OsNRAT1, FCO5			Q6ZG85	NRAT1_ORYSJ	reviewed	Metal transporter NRAT1 (Protein NRAMP ALUMINUM TRANSPORTER 1)	NRAT1 Os02g0131800 LOC_Os02g03900 OJ1007_D04.24 OsJ_05257	integral component of membrane [GO:0016021]; plasma membrane [GO:0005886]; aluminum ion transmembrane transporter activity [GO:0015083]; cadmium ion transmembrane transporter activity [GO:0015086]; manganese ion transmembrane transporter activity [GO:0005384]; aluminum cation transport [GO:0015690]; iron ion transmembrane transport [GO:0034755]; response to aluminum ion [GO:0010044]	SUBCELLULAR LOCATION: Cell membrane {ECO:0000269|PubMed:20937890}; Multi-pass membrane protein {ECO:0000269|PubMed:20937890}.	osa:4328200;	PF01566;
5	LOC_Os07g15460	517.543	-3.04903	0.267606	3.35e-31	5.48e-29	metal transporter Nramp6, putative, expressed	Os07g0258400	OsNramp1, OsNRAMP1, OsNramp6	OsNramp1		A0A1Y1B854	A0A1Y1B854_ORYSJ	unreviewed	Metal transporter	OsNRAMP1	integral component of membrane [GO:0016021]; metal ion transmembrane transporter activity [GO:0046873]		osa:4342862;	PF01566;

[truncated: 5 more sheets: NRAMP_leaves_seedling, NRAMP_leaves_mature, ZIP_root, ZIP_leaves_seedling, ZIP_leaves_mature]
